# Supplementary material for: The tRNA thiolation-mediated translational control is essential for plant immunity
Source: eLife. 2024 Jan 29;13:e93517. doi: 10.7554/eLife.93517 (PMC10863982; doi:10.7554/eLife.93517)
Supplement: Figure 1—source data 1. [file elife-93517-fig1-data1.xlsx]

## Sheet: Sheet1
WT	cgb	COM	rol5-c	npr1
4.53148	5.14613	4.88081	5.61278	7.72428
4.74819	7.03342	4.51851	6.64345	7.77159
4.88649	7.32222	4.61278	7.5682	7.41497
4.32222	6.82608	5.04139	6.53148	7.70757
3.38021	6.25527	3.38021	5.81954	7.14613
4.65321	6.47712	3.53148	5.88649	7.37658
4.53148	7.04532	3.38021	5.82608	7.58092
