# Supplementary material for: The tRNA thiolation-mediated translational control is essential for plant immunity
Source: eLife. 2024 Jan 29;13:e93517. doi: 10.7554/eLife.93517 (PMC10863982; doi:10.7554/eLife.93517)
Supplement: Figure 3—source data 1. [file elife-93517-fig3-data1.xlsx]

## Sheet: Sheet1
WT	rol5-c	ctu2-1
4.27875	5.7271	5.47712
4.32222	5.99564	5.716
4.54407	5.72119	5.99123
4.716	6.27875	5.69897
4.61278	5.62325	5.36173
3.83885	5.89763	6.14613
3.89763	5.65321	5.79934
