# Supplementary material for: The tRNA thiolation-mediated translational control is essential for plant immunity
Source: eLife. 2024 Jan 29;13:e93517. doi: 10.7554/eLife.93517 (PMC10863982; doi:10.7554/eLife.93517)
Supplement: Figure 3—source data 2. [file elife-93517-fig3-data2.xlsx]

## Sheet: mcm5s2data1
Time	Intensity	Genotype	Modifications
0.00476706	19.1576	rol5-c	mcm5U
0.0114662	19.1576	rol5-c	mcm5U
0.018155	14.2112	rol5-c	mcm5U
0.024844	4.12372	rol5-c	mcm5U
0.0315398	0	rol5-c	mcm5U
0.0382314	0	rol5-c	mcm5U
0.0449238	0	rol5-c	mcm5U
0.0516167	0	rol5-c	mcm5U
0.058306	0	rol5-c	mcm5U
0.0649981	0	rol5-c	mcm5U
0.0716896	0	rol5-c	mcm5U
0.0783784	0	rol5-c	mcm5U
0.0850734	0	rol5-c	mcm5U
0.0917632	0	rol5-c	mcm5U
0.0984549	0	rol5-c	mcm5U
0.105145	0	rol5-c	mcm5U
0.111834	0	rol5-c	mcm5U
0.118523	7.88716	rol5-c	mcm5U
0.125215	18.4013	rol5-c	mcm5U
0.131905	12.6756	rol5-c	mcm5U
0.138595	2.33543	rol5-c	mcm5U
0.145286	0	rol5-c	mcm5U
0.151976	5.78874	rol5-c	mcm5U
0.158667	24.4559	rol5-c	mcm5U
0.16536	31.6348	rol5-c	mcm5U
0.172055	12.7533	rol5-c	mcm5U
0.178748	0	rol5-c	mcm5U
0.18544	0	rol5-c	mcm5U
0.192131	0	rol5-c	mcm5U
0.198825	0	rol5-c	mcm5U
0.20552	0	rol5-c	mcm5U
0.212212	0	rol5-c	mcm5U
0.218902	0	rol5-c	mcm5U
0.22559	0	rol5-c	mcm5U
0.23228	0	rol5-c	mcm5U
0.238974	5.24423	rol5-c	mcm5U
0.245664	26.7407	rol5-c	mcm5U
0.252357	38.01	rol5-c	mcm5U
0.259048	16.1761	rol5-c	mcm5U
0.26574	47.35	rol5-c	mcm5U
0.272434	96.5631	rol5-c	mcm5U
0.279125	72.2291	rol5-c	mcm5U
0.285815	56.321	rol5-c	mcm5U
0.292507	42.8456	rol5-c	mcm5U
0.299198	16.9559	rol5-c	mcm5U
0.30589	5.20877	rol5-c	mcm5U
0.312578	15.9763	rol5-c	mcm5U
0.31927	32.5812	rol5-c	mcm5U
0.32596	16.1059	rol5-c	mcm5U
0.332655	29.1885	rol5-c	mcm5U
0.339346	59.5255	rol5-c	mcm5U
0.346041	49.0756	rol5-c	mcm5U
0.352728	40.0737	rol5-c	mcm5U
0.359417	19.8097	rol5-c	mcm5U
0.366108	0	rol5-c	mcm5U
0.372798	0	rol5-c	mcm5U
0.37949	0	rol5-c	mcm5U
0.386178	0	rol5-c	mcm5U
0.392868	0	rol5-c	mcm5U
0.399557	0	rol5-c	mcm5U
0.406246	0	rol5-c	mcm5U
0.41294	0	rol5-c	mcm5U
0.419636	0	rol5-c	mcm5U
0.426325	0	rol5-c	mcm5U
0.433014	0	rol5-c	mcm5U
0.439703	0	rol5-c	mcm5U
0.446395	0	rol5-c	mcm5U
0.453086	0	rol5-c	mcm5U
0.459776	0	rol5-c	mcm5U
0.46647	0	rol5-c	mcm5U
0.473158	0	rol5-c	mcm5U
0.47985	0	rol5-c	mcm5U
0.486538	0	rol5-c	mcm5U
0.493227	0	rol5-c	mcm5U
0.499922	0	rol5-c	mcm5U
0.506615	0	rol5-c	mcm5U
0.513306	0	rol5-c	mcm5U
0.519997	0	rol5-c	mcm5U
0.526689	0	rol5-c	mcm5U
0.533379	0	rol5-c	mcm5U
0.540071	0	rol5-c	mcm5U
0.546761	0	rol5-c	mcm5U
0.55345	0	rol5-c	mcm5U
0.560141	0	rol5-c	mcm5U
0.566833	0	rol5-c	mcm5U
0.573524	0	rol5-c	mcm5U
0.580213	0	rol5-c	mcm5U
0.586902	0	rol5-c	mcm5U
0.593593	0	rol5-c	mcm5U
0.600285	0	rol5-c	mcm5U
0.606975	0	rol5-c	mcm5U
0.613665	0	rol5-c	mcm5U
0.620355	0	rol5-c	mcm5U
0.627047	0	rol5-c	mcm5U
0.633739	0	rol5-c	mcm5U
0.640428	0	rol5-c	mcm5U
0.647122	0	rol5-c	mcm5U
0.653814	0	rol5-c	mcm5U
0.660505	0	rol5-c	mcm5U
0.667201	0	rol5-c	mcm5U
0.673889	0	rol5-c	mcm5U
0.680577	0	rol5-c	mcm5U
0.687271	0	rol5-c	mcm5U
0.69396	0	rol5-c	mcm5U
0.700653	0	rol5-c	mcm5U
0.707344	0	rol5-c	mcm5U
0.714035	18.2084	rol5-c	mcm5U
0.720723	37.1332	rol5-c	mcm5U
0.727411	18.3561	rol5-c	mcm5U
0.734103	9.76938	rol5-c	mcm5U
0.740794	19.9232	rol5-c	mcm5U
0.747489	9.84864	rol5-c	mcm5U
0.754179	0	rol5-c	mcm5U
0.76087	0	rol5-c	mcm5U
0.767562	23.4309	rol5-c	mcm5U
0.774254	47.7838	rol5-c	mcm5U
0.780944	23.621	rol5-c	mcm5U
0.787634	0	rol5-c	mcm5U
0.794323	0	rol5-c	mcm5U
0.801017	0	rol5-c	mcm5U
0.807709	12.3648	rol5-c	mcm5U
0.814404	25.2162	rol5-c	mcm5U
0.821092	23.482	rol5-c	mcm5U
0.827782	22.4671	rol5-c	mcm5U
0.834474	11.1062	rol5-c	mcm5U
0.841164	0	rol5-c	mcm5U
0.847858	0	rol5-c	mcm5U
0.854553	0	rol5-c	mcm5U
0.861247	0	rol5-c	mcm5U
0.867941	0	rol5-c	mcm5U
0.874629	0	rol5-c	mcm5U
0.88132	0	rol5-c	mcm5U
0.888009	0	rol5-c	mcm5U
0.8947	0	rol5-c	mcm5U
0.901389	0	rol5-c	mcm5U
0.908078	0	rol5-c	mcm5U
0.914773	0	rol5-c	mcm5U
0.921461	0	rol5-c	mcm5U
0.928152	0	rol5-c	mcm5U
0.934843	0	rol5-c	mcm5U
0.941535	1.63978	rol5-c	mcm5U
0.948225	3.34409	rol5-c	mcm5U
0.954912	1.65308	rol5-c	mcm5U
0.961604	15.3745	rol5-c	mcm5U
0.968295	31.3542	rol5-c	mcm5U
0.974987	44.3713	rol5-c	mcm5U
0.981676	58.8797	rol5-c	mcm5U
0.988367	29.106	rol5-c	mcm5U
0.995055	0	rol5-c	mcm5U
1.00175	17.0911	rol5-c	mcm5U
1.00844	34.8546	rol5-c	mcm5U
1.01513	17.2297	rol5-c	mcm5U
1.02182	0	rol5-c	mcm5U
1.02851	0	rol5-c	mcm5U
1.03521	9.49578	rol5-c	mcm5U
1.0419	19.3652	rol5-c	mcm5U
1.04859	21.5446	rol5-c	mcm5U
1.05528	76.2793	rol5-c	mcm5U
1.06198	142.648	rol5-c	mcm5U
1.06867	102.879	rol5-c	mcm5U
1.07536	36.612	rol5-c	mcm5U
1.08206	35.2073	rol5-c	mcm5U
1.08875	57.6568	rol5-c	mcm5U
1.09544	99.3699	rol5-c	mcm5U
1.10213	141.173	rol5-c	mcm5U
1.10882	129.373	rol5-c	mcm5U
1.11551	73.8315	rol5-c	mcm5U
1.1222	72.6705	rol5-c	mcm5U
1.12889	118.146	rol5-c	mcm5U
1.13559	126.554	rol5-c	mcm5U
1.14228	115.88	rol5-c	mcm5U
1.14897	68.7104	rol5-c	mcm5U
1.15566	80.9088	rol5-c	mcm5U
1.16234	119.678	rol5-c	mcm5U
1.16904	92.0794	rol5-c	mcm5U
1.17573	106.223	rol5-c	mcm5U
1.18242	103.274	rol5-c	mcm5U
1.18911	45.9631	rol5-c	mcm5U
1.1958	32.5089	rol5-c	mcm5U
1.20249	38.5278	rol5-c	mcm5U
1.20918	16.0787	rol5-c	mcm5U
1.21587	18.6075	rol5-c	mcm5U
1.22257	67.158	rol5-c	mcm5U
1.22926	104.33	rol5-c	mcm5U
1.23594	92.6598	rol5-c	mcm5U
1.24264	46.9872	rol5-c	mcm5U
1.24933	10.27	rol5-c	mcm5U
1.25602	0	rol5-c	mcm5U
1.26272	0	rol5-c	mcm5U
1.26941	0	rol5-c	mcm5U
1.2761	0	rol5-c	mcm5U
1.28279	0	rol5-c	mcm5U
1.28948	0	rol5-c	mcm5U
1.29617	0	rol5-c	mcm5U
1.30286	0	rol5-c	mcm5U
1.30955	0	rol5-c	mcm5U
1.31624	25.9343	rol5-c	mcm5U
1.32293	55.6588	rol5-c	mcm5U
1.32962	41.8091	rol5-c	mcm5U
1.33631	23.2182	rol5-c	mcm5U
1.343	10.0972	rol5-c	mcm5U
1.34969	0	rol5-c	mcm5U
1.35638	0	rol5-c	mcm5U
1.36307	0	rol5-c	mcm5U
1.36977	0	rol5-c	mcm5U
1.37646	0	rol5-c	mcm5U
1.38315	0	rol5-c	mcm5U
1.38984	0	rol5-c	mcm5U
1.39653	0	rol5-c	mcm5U
1.40322	0	rol5-c	mcm5U
1.40991	0	rol5-c	mcm5U
1.4166	0	rol5-c	mcm5U
1.42329	0	rol5-c	mcm5U
1.42999	0	rol5-c	mcm5U
1.43668	0	rol5-c	mcm5U
1.44337	0	rol5-c	mcm5U
1.45006	0	rol5-c	mcm5U
1.45675	0	rol5-c	mcm5U
1.46344	0	rol5-c	mcm5U
1.47014	0	rol5-c	mcm5U
1.47683	0	rol5-c	mcm5U
1.48352	0	rol5-c	mcm5U
1.49021	0	rol5-c	mcm5U
1.49691	0	rol5-c	mcm5U
1.5036	0	rol5-c	mcm5U
1.51029	0	rol5-c	mcm5U
1.51698	0	rol5-c	mcm5U
1.52367	0	rol5-c	mcm5U
1.53036	0	rol5-c	mcm5U
1.53705	0	rol5-c	mcm5U
1.54374	0	rol5-c	mcm5U
1.55043	0	rol5-c	mcm5U
1.55712	0	rol5-c	mcm5U
1.56381	0	rol5-c	mcm5U
1.57051	0	rol5-c	mcm5U
1.5772	0	rol5-c	mcm5U
1.58389	0	rol5-c	mcm5U
1.59058	0	rol5-c	mcm5U
1.59727	0	rol5-c	mcm5U
1.60396	0	rol5-c	mcm5U
1.61065	0	rol5-c	mcm5U
1.61734	0	rol5-c	mcm5U
1.62403	0	rol5-c	mcm5U
1.63072	0	rol5-c	mcm5U
1.63741	0	rol5-c	mcm5U
1.6441	0	rol5-c	mcm5U
1.65079	0	rol5-c	mcm5U
1.65748	0	rol5-c	mcm5U
1.66418	0	rol5-c	mcm5U
1.67087	0	rol5-c	mcm5U
1.67756	0	rol5-c	mcm5U
1.68425	10.2359	rol5-c	mcm5U
1.69094	20.8746	rol5-c	mcm5U
1.69763	10.319	rol5-c	mcm5U
1.70432	0	rol5-c	mcm5U
1.71101	0	rol5-c	mcm5U
1.7177	0	rol5-c	mcm5U
1.72439	0	rol5-c	mcm5U
1.73108	0	rol5-c	mcm5U
1.73777	0	rol5-c	mcm5U
1.74446	0	rol5-c	mcm5U
1.75116	9.51773	rol5-c	mcm5U
1.75784	24.2698	rol5-c	mcm5U
1.76454	26.1726	rol5-c	mcm5U
1.77123	20.8243	rol5-c	mcm5U
1.77792	18.4277	rol5-c	mcm5U
1.78462	44.0828	rol5-c	mcm5U
1.79131	73.4286	rol5-c	mcm5U
1.798	48.8939	rol5-c	mcm5U
1.80469	43.0468	rol5-c	mcm5U
1.81139	80.9597	rol5-c	mcm5U
1.81808	57.778	rol5-c	mcm5U
1.82477	44.9632	rol5-c	mcm5U
1.83146	66.871	rol5-c	mcm5U
1.83816	45.7813	rol5-c	mcm5U
1.84485	25.1224	rol5-c	mcm5U
1.85154	19.6838	rol5-c	mcm5U
1.85823	44.0086	rol5-c	mcm5U
1.86493	111.567	rol5-c	mcm5U
1.87162	145.135	rol5-c	mcm5U
1.87831	144.37	rol5-c	mcm5U
1.885	175.606	rol5-c	mcm5U
1.89169	197.221	rol5-c	mcm5U
1.89838	150.306	rol5-c	mcm5U
1.90507	106.091	rol5-c	mcm5U
1.91177	98.7457	rol5-c	mcm5U
1.91846	95.7343	rol5-c	mcm5U
1.92515	149.514	rol5-c	mcm5U
1.93185	248.343	rol5-c	mcm5U
1.93854	257.091	rol5-c	mcm5U
1.94523	239.467	rol5-c	mcm5U
1.95192	384.346	rol5-c	mcm5U
1.95861	527.56	rol5-c	mcm5U
1.96531	418.807	rol5-c	mcm5U
1.972	299.192	rol5-c	mcm5U
1.97869	431.922	rol5-c	mcm5U
1.98538	521.063	rol5-c	mcm5U
1.99207	530.875	rol5-c	mcm5U
1.99877	566.666	rol5-c	mcm5U
2.00546	559.148	rol5-c	mcm5U
2.01215	617.377	rol5-c	mcm5U
2.01884	673.381	rol5-c	mcm5U
2.02553	676.67	rol5-c	mcm5U
2.03223	578.539	rol5-c	mcm5U
2.03892	474.878	rol5-c	mcm5U
2.04561	677.42	rol5-c	mcm5U
2.05231	880.257	rol5-c	mcm5U
2.059	871.211	rol5-c	mcm5U
2.06569	922.861	rol5-c	mcm5U
2.07238	1131.07	rol5-c	mcm5U
2.07907	1163.51	rol5-c	mcm5U
2.08577	1007.07	rol5-c	mcm5U
2.09246	980.003	rol5-c	mcm5U
2.09915	944.291	rol5-c	mcm5U
2.10585	999.73	rol5-c	mcm5U
2.11253	1019.85	rol5-c	mcm5U
2.11922	857.045	rol5-c	mcm5U
2.12592	885.466	rol5-c	mcm5U
2.13261	888.191	rol5-c	mcm5U
2.1393	702.002	rol5-c	mcm5U
2.14599	633.884	rol5-c	mcm5U
2.15267	587.153	rol5-c	mcm5U
2.15937	581.881	rol5-c	mcm5U
2.16606	729.664	rol5-c	mcm5U
2.17275	965.265	rol5-c	mcm5U
2.17944	946.214	rol5-c	mcm5U
2.18614	798.554	rol5-c	mcm5U
2.19283	833.217	rol5-c	mcm5U
2.19952	818.898	rol5-c	mcm5U
2.20621	743.645	rol5-c	mcm5U
2.2129	676.63	rol5-c	mcm5U
2.21959	538.747	rol5-c	mcm5U
2.22628	444.553	rol5-c	mcm5U
2.23298	469.748	rol5-c	mcm5U
2.23967	567.66	rol5-c	mcm5U
2.24636	545.712	rol5-c	mcm5U
2.25306	556.155	rol5-c	mcm5U
2.25974	666.072	rol5-c	mcm5U
2.26644	704.908	rol5-c	mcm5U
2.27313	692.622	rol5-c	mcm5U
2.27982	607.478	rol5-c	mcm5U
2.28651	596.98	rol5-c	mcm5U
2.29321	616.497	rol5-c	mcm5U
2.2999	613.047	rol5-c	mcm5U
2.30659	614.869	rol5-c	mcm5U
2.31328	535.861	rol5-c	mcm5U
2.31997	516.134	rol5-c	mcm5U
2.32666	593.337	rol5-c	mcm5U
2.33336	575.993	rol5-c	mcm5U
2.34005	531.058	rol5-c	mcm5U
2.34674	546.008	rol5-c	mcm5U
2.35343	573.571	rol5-c	mcm5U
2.36012	600.931	rol5-c	mcm5U
2.36681	516.324	rol5-c	mcm5U
2.3735	405.096	rol5-c	mcm5U
2.38019	516.471	rol5-c	mcm5U
2.38688	635.697	rol5-c	mcm5U
2.39358	547.864	rol5-c	mcm5U
2.40027	508.365	rol5-c	mcm5U
2.40696	560.649	rol5-c	mcm5U
2.41365	464.465	rol5-c	mcm5U
2.42035	293.3	rol5-c	mcm5U
2.42704	222.859	rol5-c	mcm5U
2.43373	321.353	rol5-c	mcm5U
2.44042	518.489	rol5-c	mcm5U
2.44712	576.141	rol5-c	mcm5U
2.45381	575.609	rol5-c	mcm5U
2.4605	543.447	rol5-c	mcm5U
2.46719	477.043	rol5-c	mcm5U
2.47388	569.983	rol5-c	mcm5U
2.48057	721.268	rol5-c	mcm5U
2.48726	725.914	rol5-c	mcm5U
2.49395	584.272	rol5-c	mcm5U
2.50065	454.773	rol5-c	mcm5U
2.50734	439.101	rol5-c	mcm5U
2.51403	549.324	rol5-c	mcm5U
2.52072	635.544	rol5-c	mcm5U
2.52742	624.005	rol5-c	mcm5U
2.53411	520.914	rol5-c	mcm5U
2.5408	353.242	rol5-c	mcm5U
2.54749	221.589	rol5-c	mcm5U
2.55418	300.87	rol5-c	mcm5U
2.56087	426.237	rol5-c	mcm5U
2.56756	378.785	rol5-c	mcm5U
2.57426	298.75	rol5-c	mcm5U
2.58095	236.371	rol5-c	mcm5U
2.58764	233.021	rol5-c	mcm5U
2.59434	255.655	rol5-c	mcm5U
2.60103	296.094	rol5-c	mcm5U
2.60772	351.863	rol5-c	mcm5U
2.61441	312.641	rol5-c	mcm5U
2.62111	183.992	rol5-c	mcm5U
2.62779	144.837	rol5-c	mcm5U
2.63448	235.047	rol5-c	mcm5U
2.64118	307.052	rol5-c	mcm5U
2.64787	245.938	rol5-c	mcm5U
2.65456	127.916	rol5-c	mcm5U
2.66126	80.4899	rol5-c	mcm5U
2.66795	135.831	rol5-c	mcm5U
2.67465	210.189	rol5-c	mcm5U
2.68134	215.168	rol5-c	mcm5U
2.68803	152.781	rol5-c	mcm5U
2.69472	149.699	rol5-c	mcm5U
2.70141	235.028	rol5-c	mcm5U
2.7081	227.511	rol5-c	mcm5U
2.71479	129.092	rol5-c	mcm5U
2.72148	42.3841	rol5-c	mcm5U
2.72817	4.51288	rol5-c	mcm5U
2.73487	28.7461	rol5-c	mcm5U
2.74156	131.042	rol5-c	mcm5U
2.74825	199.293	rol5-c	mcm5U
2.75494	155.823	rol5-c	mcm5U
2.76163	124.169	rol5-c	mcm5U
2.76832	85.0392	rol5-c	mcm5U
2.77502	39.8668	rol5-c	mcm5U
2.78171	49.1263	rol5-c	mcm5U
2.7884	97.5816	rol5-c	mcm5U
2.79509	121.073	rol5-c	mcm5U
2.80178	160.275	rol5-c	mcm5U
2.80847	172.124	rol5-c	mcm5U
2.81516	114.689	rol5-c	mcm5U
2.82185	96.7248	rol5-c	mcm5U
2.82854	60.8116	rol5-c	mcm5U
2.83524	45.2983	rol5-c	mcm5U
2.84193	82.2851	rol5-c	mcm5U
2.84862	98.4789	rol5-c	mcm5U
2.85531	83.0504	rol5-c	mcm5U
2.86201	33.337	rol5-c	mcm5U
2.8687	8.91802	rol5-c	mcm5U
2.87539	15.8773	rol5-c	mcm5U
2.88208	31.1992	rol5-c	mcm5U
2.88877	45.9863	rol5-c	mcm5U
2.89546	28.0992	rol5-c	mcm5U
2.90216	4.77224	rol5-c	mcm5U
2.90885	0	rol5-c	mcm5U
2.91554	0	rol5-c	mcm5U
2.92223	0	rol5-c	mcm5U
2.92892	1.27666	rol5-c	mcm5U
2.93561	22.7539	rol5-c	mcm5U
2.94231	42.3807	rol5-c	mcm5U
2.949	48.7861	rol5-c	mcm5U
2.95569	88.9216	rol5-c	mcm5U
2.96238	96.0083	rol5-c	mcm5U
2.96907	40.0337	rol5-c	mcm5U
2.97577	4.41285	rol5-c	mcm5U
2.98246	0	rol5-c	mcm5U
2.98915	0	rol5-c	mcm5U
2.99584	0	rol5-c	mcm5U
3.00253	0	rol5-c	mcm5U
3.00922	0	rol5-c	mcm5U
3.01592	36.1641	rol5-c	mcm5U
3.02261	73.7511	rol5-c	mcm5U
3.0293	55.7104	rol5-c	mcm5U
3.036	69.0069	rol5-c	mcm5U
3.04269	96.1337	rol5-c	mcm5U
3.04938	78.8282	rol5-c	mcm5U
3.05607	73.8541	rol5-c	mcm5U
3.06277	79.865	rol5-c	mcm5U
3.06946	51.457	rol5-c	mcm5U
3.07615	25.5432	rol5-c	mcm5U
3.08285	27.2821	rol5-c	mcm5U
3.08954	16.2502	rol5-c	mcm5U
3.09622	13.9766	rol5-c	mcm5U
3.10292	24.8254	rol5-c	mcm5U
3.10961	15.3629	rol5-c	mcm5U
3.1163	6.30342	rol5-c	mcm5U
3.12299	6.24497	rol5-c	mcm5U
3.12969	27.3092	rol5-c	mcm5U
3.13638	45.834	rol5-c	mcm5U
3.14307	21.0978	rol5-c	mcm5U
3.14976	0	rol5-c	mcm5U
3.15646	0	rol5-c	mcm5U
3.16315	0	rol5-c	mcm5U
3.16985	0	rol5-c	mcm5U
3.17654	0	rol5-c	mcm5U
3.18323	0	rol5-c	mcm5U
3.18993	22.3895	rol5-c	mcm5U
3.19662	72.7497	rol5-c	mcm5U
3.20331	88.5227	rol5-c	mcm5U
3.21	49.1434	rol5-c	mcm5U
3.21669	47.625	rol5-c	mcm5U
3.22338	105.088	rol5-c	mcm5U
3.23007	103.541	rol5-c	mcm5U
3.23676	54.8879	rol5-c	mcm5U
3.24346	53.737	rol5-c	mcm5U
3.25015	70.6323	rol5-c	mcm5U
3.25684	53.3187	rol5-c	mcm5U
3.26354	16.7256	rol5-c	mcm5U
3.27023	2.80292	rol5-c	mcm5U
3.27692	5.71615	rol5-c	mcm5U
3.28361	2.82568	rol5-c	mcm5U
3.2903	19.9235	rol5-c	mcm5U
3.29699	50.6852	rol5-c	mcm5U
3.30368	40.5891	rol5-c	mcm5U
3.31037	15.2459	rol5-c	mcm5U
3.31707	19.8306	rol5-c	mcm5U
3.32376	24.4247	rol5-c	mcm5U
3.33045	9.54513	rol5-c	mcm5U
3.33714	0	rol5-c	mcm5U
3.34383	0	rol5-c	mcm5U
3.35052	0	rol5-c	mcm5U
3.35721	0	rol5-c	mcm5U
3.36391	0	rol5-c	mcm5U
3.3706	0	rol5-c	mcm5U
3.37729	1.33038	rol5-c	mcm5U
3.38398	2.7131	rol5-c	mcm5U
3.39067	1.34117	rol5-c	mcm5U
3.39736	0	rol5-c	mcm5U
3.40405	7.28913	rol5-c	mcm5U
3.41074	14.8651	rol5-c	mcm5U
3.41743	7.34833	rol5-c	mcm5U
3.42413	0.00013	rol5-c	mcm5U
3.43082	6.5e-05	rol5-c	mcm5U
3.43751	0	rol5-c	mcm5U
3.44421	0	rol5-c	mcm5U
3.4509	0	rol5-c	mcm5U
3.45759	0	rol5-c	mcm5U
3.46428	0	rol5-c	mcm5U
3.47097	0	rol5-c	mcm5U
3.47767	0	rol5-c	mcm5U
3.48435	29.5354	rol5-c	mcm5U
3.49104	60.2331	rol5-c	mcm5U
3.49774	29.7751	rol5-c	mcm5U
3.50443	0	rol5-c	mcm5U
3.51112	4e-06	rol5-c	mcm5U
3.51782	9.67814	rol5-c	mcm5U
3.52451	19.7371	rol5-c	mcm5U
3.5312	9.75665	rol5-c	mcm5U
3.53789	0	rol5-c	mcm5U
3.54458	0	rol5-c	mcm5U
3.55127	0	rol5-c	mcm5U
3.55796	16.8284	rol5-c	mcm5U
3.56466	34.319	rol5-c	mcm5U
3.57135	68.1948	rol5-c	mcm5U
3.57804	115.88	rol5-c	mcm5U
3.58474	74.9034	rol5-c	mcm5U
3.59143	20.8857	rol5-c	mcm5U
3.59813	19.1465	rol5-c	mcm5U
3.60482	14.7467	rol5-c	mcm5U
3.6115	51.8092	rol5-c	mcm5U
3.61819	152.371	rol5-c	mcm5U
3.62489	285.258	rol5-c	mcm5U
3.63158	334.067	rol5-c	mcm5U
3.63827	258.003	rol5-c	mcm5U
3.64496	228.991	rol5-c	mcm5U
3.65165	206.107	rol5-c	mcm5U
3.65834	150.611	rol5-c	mcm5U
3.66503	113.265	rol5-c	mcm5U
3.67172	104.075	rol5-c	mcm5U
3.67841	200.634	rol5-c	mcm5U
3.68511	330.122	rol5-c	mcm5U
3.6918	284.069	rol5-c	mcm5U
3.69849	153.041	rol5-c	mcm5U
3.70518	107.03	rol5-c	mcm5U
3.71187	72.2688	rol5-c	mcm5U
3.71856	71.8821	rol5-c	mcm5U
3.72525	121.08	rol5-c	mcm5U
3.73194	133.274	rol5-c	mcm5U
3.73863	95.6008	rol5-c	mcm5U
3.74532	61.0424	rol5-c	mcm5U
3.75202	49.2458	rol5-c	mcm5U
3.75872	62.5116	rol5-c	mcm5U
3.76541	48.2406	rol5-c	mcm5U
3.7721	11.3137	rol5-c	mcm5U
3.77879	14.2221	rol5-c	mcm5U
3.78548	34.8953	rol5-c	mcm5U
3.79217	38.6766	rol5-c	mcm5U
3.79886	31.0727	rol5-c	mcm5U
3.80555	12.4242	rol5-c	mcm5U
3.81225	0	rol5-c	mcm5U
3.81894	0	rol5-c	mcm5U
3.82563	18.5586	rol5-c	mcm5U
3.83233	37.8475	rol5-c	mcm5U
3.83902	18.7092	rol5-c	mcm5U
3.84571	0	rol5-c	mcm5U
3.85239	32.3655	rol5-c	mcm5U
3.85909	79.6879	rol5-c	mcm5U
3.86578	60.5331	rol5-c	mcm5U
3.87247	37.2812	rol5-c	mcm5U
3.87917	47.8979	rol5-c	mcm5U
3.88586	51.1609	rol5-c	mcm5U
3.89255	56.0484	rol5-c	mcm5U
3.89924	39.32	rol5-c	mcm5U
3.90593	44.1306	rol5-c	mcm5U
3.91263	55.5601	rol5-c	mcm5U
3.91932	25.0069	rol5-c	mcm5U
3.92601	13.1008	rol5-c	mcm5U
3.9327	22.2868	rol5-c	mcm5U
3.9394	11.0171	rol5-c	mcm5U
3.94609	0	rol5-c	mcm5U
3.95278	0	rol5-c	mcm5U
3.95947	0	rol5-c	mcm5U
3.96616	0	rol5-c	mcm5U
3.97285	0	rol5-c	mcm5U
3.97954	15.8827	rol5-c	mcm5U
3.98623	41.7631	rol5-c	mcm5U
3.99293	35.1258	rol5-c	mcm5U
3.99962	7.83054	rol5-c	mcm5U
4.00631	0	rol5-c	mcm5U
4.01301	0	rol5-c	mcm5U
4.0197	0	rol5-c	mcm5U
4.02639	0	rol5-c	mcm5U
4.03308	0	rol5-c	mcm5U
4.03977	0	rol5-c	mcm5U
4.04646	0	rol5-c	mcm5U
4.05315	0	rol5-c	mcm5U
4.05984	0	rol5-c	mcm5U
4.06654	0	rol5-c	mcm5U
4.07323	23.8263	rol5-c	mcm5U
4.07992	57.4744	rol5-c	mcm5U
4.08662	42.1378	rol5-c	mcm5U
4.09331	8.95632	rol5-c	mcm5U
4.1	19.1099	rol5-c	mcm5U
4.10669	38.9718	rol5-c	mcm5U
4.11338	19.265	rol5-c	mcm5U
4.12008	8.21104	rol5-c	mcm5U
4.12677	16.7452	rol5-c	mcm5U
4.13346	8.27765	rol5-c	mcm5U
4.14015	0	rol5-c	mcm5U
4.14684	0	rol5-c	mcm5U
4.15353	0	rol5-c	mcm5U
4.16022	8.40526	rol5-c	mcm5U
4.16692	17.1413	rol5-c	mcm5U
4.17362	19.562	rol5-c	mcm5U
4.18031	25.5924	rol5-c	mcm5U
4.187	22.7896	rol5-c	mcm5U
4.19369	34.152	rol5-c	mcm5U
4.20039	46.0805	rol5-c	mcm5U
4.20708	20.0202	rol5-c	mcm5U
4.21377	0	rol5-c	mcm5U
4.22046	0	rol5-c	mcm5U
4.22715	0	rol5-c	mcm5U
4.23384	0	rol5-c	mcm5U
4.24053	0	rol5-c	mcm5U
4.24722	0	rol5-c	mcm5U
4.25392	0	rol5-c	mcm5U
4.26061	0	rol5-c	mcm5U
4.2673	0	rol5-c	mcm5U
4.27399	10.7186	rol5-c	mcm5U
4.28069	21.859	rol5-c	mcm5U
4.28738	10.8056	rol5-c	mcm5U
4.29407	0	rol5-c	mcm5U
4.30076	0	rol5-c	mcm5U
4.30745	0	rol5-c	mcm5U
4.31414	0	rol5-c	mcm5U
4.32083	20.1204	rol5-c	mcm5U
4.32752	52.6163	rol5-c	mcm5U
4.33422	43.9072	rol5-c	mcm5U
4.34091	11.6779	rol5-c	mcm5U
4.3476	0	rol5-c	mcm5U
4.35429	0	rol5-c	mcm5U
4.36099	0	rol5-c	mcm5U
4.36768	0	rol5-c	mcm5U
4.37437	0	rol5-c	mcm5U
4.38106	0	rol5-c	mcm5U
4.38775	0	rol5-c	mcm5U
4.39444	0	rol5-c	mcm5U
4.40114	0	rol5-c	mcm5U
4.40783	0	rol5-c	mcm5U
4.41453	0	rol5-c	mcm5U
4.42121	0	rol5-c	mcm5U
4.42791	13.7615	rol5-c	mcm5U
4.4346	28.0644	rol5-c	mcm5U
4.44129	13.8731	rol5-c	mcm5U
4.44798	10.8601	rol5-c	mcm5U
4.45467	22.1476	rol5-c	mcm5U
4.46136	10.9482	rol5-c	mcm5U
4.46805	0	rol5-c	mcm5U
4.47475	0	rol5-c	mcm5U
4.48144	0	rol5-c	mcm5U
4.48813	0	rol5-c	mcm5U
4.49483	0	rol5-c	mcm5U
4.50152	0	rol5-c	mcm5U
4.50821	0	rol5-c	mcm5U
4.5149	0	rol5-c	mcm5U
4.52159	0	rol5-c	mcm5U
4.52828	0	rol5-c	mcm5U
4.53497	0	rol5-c	mcm5U
4.54167	0	rol5-c	mcm5U
4.54835	0	rol5-c	mcm5U
4.55505	0	rol5-c	mcm5U
4.56174	0	rol5-c	mcm5U
4.56843	0	rol5-c	mcm5U
4.57512	0	rol5-c	mcm5U
4.58182	0	rol5-c	mcm5U
4.58851	0	rol5-c	mcm5U
4.5952	0	rol5-c	mcm5U
4.60189	0	rol5-c	mcm5U
4.60859	0	rol5-c	mcm5U
4.61528	0	rol5-c	mcm5U
4.62197	0	rol5-c	mcm5U
4.62867	0	rol5-c	mcm5U
4.63536	0	rol5-c	mcm5U
4.64205	7.81469	rol5-c	mcm5U
4.64874	46.8583	rol5-c	mcm5U
4.65544	70.9377	rol5-c	mcm5U
4.66213	31.1723	rol5-c	mcm5U
4.66883	0	rol5-c	mcm5U
4.67552	7.2797	rol5-c	mcm5U
4.68221	14.8458	rol5-c	mcm5U
4.6889	7.33876	rol5-c	mcm5U
4.69559	0	rol5-c	mcm5U
4.70229	0	rol5-c	mcm5U
4.70898	0	rol5-c	mcm5U
4.71567	0	rol5-c	mcm5U
4.72236	0	rol5-c	mcm5U
4.72905	0	rol5-c	mcm5U
4.73574	0	rol5-c	mcm5U
4.74244	0	rol5-c	mcm5U
4.74913	0	rol5-c	mcm5U
4.75582	0	rol5-c	mcm5U
4.76251	0	rol5-c	mcm5U
4.76921	0	rol5-c	mcm5U
4.7759	0	rol5-c	mcm5U
4.78259	0	rol5-c	mcm5U
4.78928	0	rol5-c	mcm5U
4.79597	0	rol5-c	mcm5U
4.80267	0	rol5-c	mcm5U
4.80936	0	rol5-c	mcm5U
4.81605	0	rol5-c	mcm5U
4.82275	0	rol5-c	mcm5U
4.82944	0	rol5-c	mcm5U
4.83613	7.5e-05	rol5-c	mcm5U
4.84282	0.000152	rol5-c	mcm5U
4.84952	15.4968	rol5-c	mcm5U
4.85621	31.6033	rol5-c	mcm5U
4.8629	15.6227	rol5-c	mcm5U
4.8696	8.54321	rol5-c	mcm5U
4.87629	45.7891	rol5-c	mcm5U
4.88297	66.4622	rol5-c	mcm5U
4.88967	28.597	rol5-c	mcm5U
4.89636	21.0721	rol5-c	mcm5U
4.90305	48.2605	rol5-c	mcm5U
4.90974	52.4105	rol5-c	mcm5U
4.91644	46.9017	rol5-c	mcm5U
4.92312	21.1396	rol5-c	mcm5U
4.92982	1.20242	rol5-c	mcm5U
4.93651	0.594391	rol5-c	mcm5U
4.94321	0	rol5-c	mcm5U
4.9499	0	rol5-c	mcm5U
4.95659	0	rol5-c	mcm5U
4.96328	12.6835	rol5-c	mcm5U
4.96997	34.6371	rol5-c	mcm5U
4.97666	30.6736	rol5-c	mcm5U
4.98336	8.8422	rol5-c	mcm5U
4.99005	0	rol5-c	mcm5U
4.99674	0	rol5-c	mcm5U
5.00343	0	rol5-c	mcm5U
5.01012	0	rol5-c	mcm5U
5.01682	0	rol5-c	mcm5U
5.02351	0	rol5-c	mcm5U
5.0302	0	rol5-c	mcm5U
5.03689	0	rol5-c	mcm5U
5.04358	0	rol5-c	mcm5U
5.05027	0	rol5-c	mcm5U
5.05696	0	rol5-c	mcm5U
5.06365	0	rol5-c	mcm5U
5.07034	0	rol5-c	mcm5U
5.07703	0	rol5-c	mcm5U
5.08373	0	rol5-c	mcm5U
5.09042	0	rol5-c	mcm5U
5.09711	0	rol5-c	mcm5U
5.1038	0	rol5-c	mcm5U
5.11049	0	rol5-c	mcm5U
5.11718	0	rol5-c	mcm5U
5.12387	0	rol5-c	mcm5U
5.13056	19.3105	rol5-c	mcm5U
5.13726	46.2612	rol5-c	mcm5U
5.14395	33.4988	rol5-c	mcm5U
5.15064	7.00594	rol5-c	mcm5U
5.15733	15.544	rol5-c	mcm5U
5.16402	31.6996	rol5-c	mcm5U
5.17072	15.6701	rol5-c	mcm5U
5.17741	0	rol5-c	mcm5U
5.1841	16.1102	rol5-c	mcm5U
5.19079	34.7974	rol5-c	mcm5U
5.19748	20.2036	rol5-c	mcm5U
5.20417	32.7426	rol5-c	mcm5U
5.21087	89.4694	rol5-c	mcm5U
5.21756	109.419	rol5-c	mcm5U
5.22425	75.7583	rol5-c	mcm5U
5.23094	24.1621	rol5-c	mcm5U
5.23763	7e-06	rol5-c	mcm5U
5.24432	0	rol5-c	mcm5U
5.25102	7.34446	rol5-c	mcm5U
5.25771	14.9779	rol5-c	mcm5U
5.2644	7.40404	rol5-c	mcm5U
5.27109	7.67352	rol5-c	mcm5U
5.27779	15.649	rol5-c	mcm5U
5.28448	7.73578	rol5-c	mcm5U
5.29117	2.40692	rol5-c	mcm5U
5.29787	4.90855	rol5-c	mcm5U
5.30456	3.869	rol5-c	mcm5U
5.31125	2.94188	rol5-c	mcm5U
5.31794	1.45426	rol5-c	mcm5U
5.32463	9.63906	rol5-c	mcm5U
5.33133	19.6574	rol5-c	mcm5U
5.33802	23.9238	rol5-c	mcm5U
5.34471	49.7146	rol5-c	mcm5U
5.3514	56.6229	rol5-c	mcm5U
5.35809	20.9107	rol5-c	mcm5U
5.36479	6.49968	rol5-c	mcm5U
5.37148	13.2552	rol5-c	mcm5U
5.37817	7.29384	rol5-c	mcm5U
5.38486	1.51192	rol5-c	mcm5U
5.39156	39.6473	rol5-c	mcm5U
5.39825	82.178	rol5-c	mcm5U
5.40494	45.0228	rol5-c	mcm5U
5.41163	2.87117	rol5-c	mcm5U
5.41833	0.000289	rol5-c	mcm5U
5.42502	0	rol5-c	mcm5U
5.43172	0	rol5-c	mcm5U
5.43841	0	rol5-c	mcm5U
5.4451	0	rol5-c	mcm5U
5.45179	0	rol5-c	mcm5U
5.45848	0	rol5-c	mcm5U
5.46518	0	rol5-c	mcm5U
5.47187	0	rol5-c	mcm5U
5.47856	12.4476	rol5-c	mcm5U
5.48525	25.385	rol5-c	mcm5U
5.49194	12.5486	rol5-c	mcm5U
5.49863	0	rol5-c	mcm5U
5.50533	0.000212	rol5-c	mcm5U
5.51202	0.000432	rol5-c	mcm5U
5.51871	11.9679	rol5-c	mcm5U
5.5254	24.4063	rol5-c	mcm5U
5.5321	12.0648	rol5-c	mcm5U
5.53879	0	rol5-c	mcm5U
5.54548	0	rol5-c	mcm5U
5.55217	35.5063	rol5-c	mcm5U
5.55887	72.4096	rol5-c	mcm5U
5.56556	44.0926	rol5-c	mcm5U
5.57225	34.9626	rol5-c	mcm5U
5.57894	45.1544	rol5-c	mcm5U
5.58564	18.1858	rol5-c	mcm5U
5.59233	0	rol5-c	mcm5U
5.59902	0	rol5-c	mcm5U
5.60571	0	rol5-c	mcm5U
5.61241	0	rol5-c	mcm5U
5.6191	0	rol5-c	mcm5U
5.62579	19.6288	rol5-c	mcm5U
5.63249	49.0474	rol5-c	mcm5U
5.63918	47.9693	rol5-c	mcm5U
5.64587	29.2973	rol5-c	mcm5U
5.65256	9.98879	rol5-c	mcm5U
5.65925	0	rol5-c	mcm5U
5.66594	0	rol5-c	mcm5U
5.67264	0	rol5-c	mcm5U
5.67933	0	rol5-c	mcm5U
5.68602	0	rol5-c	mcm5U
5.69271	3.68208	rol5-c	mcm5U
5.69941	7.50904	rol5-c	mcm5U
5.7061	31.5459	rol5-c	mcm5U
5.71279	56.7631	rol5-c	mcm5U
5.71948	28.0598	rol5-c	mcm5U
5.72617	0	rol5-c	mcm5U
5.73286	0	rol5-c	mcm5U
5.73955	0	rol5-c	mcm5U
5.74624	0	rol5-c	mcm5U
5.75294	0.000125	rol5-c	mcm5U
5.75963	27.8764	rol5-c	mcm5U
5.76632	56.8493	rol5-c	mcm5U
5.77301	28.1023	rol5-c	mcm5U
5.77971	7.36193	rol5-c	mcm5U
5.7864	15.0135	rol5-c	mcm5U
5.79309	7.42166	rol5-c	mcm5U
5.79978	0	rol5-c	mcm5U
5.80647	0.000133	rol5-c	mcm5U
5.81316	0.000271	rol5-c	mcm5U
5.81985	0.000134	rol5-c	mcm5U
5.82654	0	rol5-c	mcm5U
5.83324	0	rol5-c	mcm5U
5.83993	20.942	rol5-c	mcm5U
5.84662	42.7081	rol5-c	mcm5U
5.85331	21.1119	rol5-c	mcm5U
5.86	0	rol5-c	mcm5U
5.8667	0	rol5-c	mcm5U
5.87339	0	rol5-c	mcm5U
5.88008	0	rol5-c	mcm5U
5.88677	0	rol5-c	mcm5U
5.89346	8.24541	rol5-c	mcm5U
5.90015	21.5874	rol5-c	mcm5U
5.90684	18.0444	rol5-c	mcm5U
5.91353	7.50842	rol5-c	mcm5U
5.92023	5.50125	rol5-c	mcm5U
5.92692	2.71944	rol5-c	mcm5U
5.93361	0	rol5-c	mcm5U
5.9403	0	rol5-c	mcm5U
5.94699	0	rol5-c	mcm5U
5.95368	0	rol5-c	mcm5U
5.96038	0	rol5-c	mcm5U
5.96707	1.9e-05	rol5-c	mcm5U
5.97376	3.8e-05	rol5-c	mcm5U
5.98045	1.9e-05	rol5-c	mcm5U
5.98714	0	rol5-c	mcm5U
5.99383	23.7074	rol5-c	mcm5U
6.00053	52.5751	rol5-c	mcm5U
6.00722	32.5786	rol5-c	mcm5U
6.01391	4.30237	rol5-c	mcm5U
6.0206	0	rol5-c	mcm5U
6.02729	0	rol5-c	mcm5U
6.03398	26.1009	rol5-c	mcm5U
6.04068	53.2288	rol5-c	mcm5U
6.04737	26.3127	rol5-c	mcm5U
6.05406	0	rol5-c	mcm5U
6.06075	10.9736	rol5-c	mcm5U
6.06744	22.379	rol5-c	mcm5U
6.07413	11.0626	rol5-c	mcm5U
6.08083	0	rol5-c	mcm5U
6.08751	0	rol5-c	mcm5U
6.0942	0	rol5-c	mcm5U
6.1009	8.60435	rol5-c	mcm5U
6.10759	17.5473	rol5-c	mcm5U
6.11428	21.5358	rol5-c	mcm5U
6.12097	26.2294	rol5-c	mcm5U
6.12767	34.9915	rol5-c	mcm5U
6.13436	44.9177	rol5-c	mcm5U
6.14105	24.7617	rol5-c	mcm5U
6.14774	24.4316	rol5-c	mcm5U
6.15443	49.9726	rol5-c	mcm5U
6.16112	36.1071	rol5-c	mcm5U
6.16782	8.27267	rol5-c	mcm5U
6.17451	4.9166	rol5-c	mcm5U
6.1812	10.0267	rol5-c	mcm5U
6.18789	10.8145	rol5-c	mcm5U
6.19458	14.2208	rol5-c	mcm5U
6.20127	21.9275	rol5-c	mcm5U
6.20797	26.2238	rol5-c	mcm5U
6.21466	11.8621	rol5-c	mcm5U
6.22134	0	rol5-c	mcm5U
6.22803	0	rol5-c	mcm5U
6.23473	0.763674	rol5-c	mcm5U
6.24142	1.5574	rol5-c	mcm5U
6.24811	0.76987	rol5-c	mcm5U
6.25481	0	rol5-c	mcm5U
6.2615	0	rol5-c	mcm5U
6.26819	0	rol5-c	mcm5U
6.27488	0	rol5-c	mcm5U
6.28158	0	rol5-c	mcm5U
6.28827	0	rol5-c	mcm5U
6.29497	0	rol5-c	mcm5U
6.30166	0	rol5-c	mcm5U
6.30835	0	rol5-c	mcm5U
6.31504	0	rol5-c	mcm5U
6.32173	0	rol5-c	mcm5U
6.32842	22.3351	rol5-c	mcm5U
6.33512	49.5293	rol5-c	mcm5U
6.34181	30.6332	rol5-c	mcm5U
6.34851	17.9436	rol5-c	mcm5U
6.3552	28.4105	rol5-c	mcm5U
6.36189	16.2784	rol5-c	mcm5U
6.36858	4.55636	rol5-c	mcm5U
6.37527	2.25235	rol5-c	mcm5U
6.38197	0	rol5-c	mcm5U
6.38865	0	rol5-c	mcm5U
6.39534	0	rol5-c	mcm5U
6.40204	0.000125	rol5-c	mcm5U
6.40873	0.000255	rol5-c	mcm5U
6.41542	0.000126	rol5-c	mcm5U
6.42211	4.24049	rol5-c	mcm5U
6.42881	8.64783	rol5-c	mcm5U
6.4355	7.84199	rol5-c	mcm5U
6.44219	31.1724	rol5-c	mcm5U
6.44888	52.3321	rol5-c	mcm5U
6.45557	35.396	rol5-c	mcm5U
6.46227	23.0534	rol5-c	mcm5U
6.46896	19.8094	rol5-c	mcm5U
6.47565	80.5571	rol5-c	mcm5U
6.48234	147.567	rol5-c	mcm5U
6.48903	83.1109	rol5-c	mcm5U
6.49572	49.7697	rol5-c	mcm5U
6.50242	113.453	rol5-c	mcm5U
6.50911	102.104	rol5-c	mcm5U
6.5158	30.0284	rol5-c	mcm5U
6.52249	9.60847	rol5-c	mcm5U
6.52919	19.595	rol5-c	mcm5U
6.53588	17.1122	rol5-c	mcm5U
6.54257	15.1437	rol5-c	mcm5U
6.54927	10.5769	rol5-c	mcm5U
6.55596	6.30346	rol5-c	mcm5U
6.56265	7.81815	rol5-c	mcm5U
6.56934	30.1943	rol5-c	mcm5U
6.57603	58.2468	rol5-c	mcm5U
6.58273	53.6105	rol5-c	mcm5U
6.58942	34.5572	rol5-c	mcm5U
6.59611	17.327	rol5-c	mcm5U
6.6028	3.87363	rol5-c	mcm5U
6.60949	0	rol5-c	mcm5U
6.61618	0	rol5-c	mcm5U
6.62287	0	rol5-c	mcm5U
6.62956	0	rol5-c	mcm5U
6.63625	0	rol5-c	mcm5U
6.64294	0	rol5-c	mcm5U
6.64964	4.89719	rol5-c	mcm5U
6.65633	9.98708	rol5-c	mcm5U
6.66302	11.687	rol5-c	mcm5U
6.66971	13.7657	rol5-c	mcm5U
6.6764	25.2525	rol5-c	mcm5U
6.68309	37.6213	rol5-c	mcm5U
6.68979	18.5974	rol5-c	mcm5U
6.69648	14.4612	rol5-c	mcm5U
6.70317	29.4914	rol5-c	mcm5U
6.70986	14.5785	rol5-c	mcm5U
6.71655	3.53012	rol5-c	mcm5U
6.72324	7.19915	rol5-c	mcm5U
6.72993	3.55876	rol5-c	mcm5U
6.73663	0	rol5-c	mcm5U
6.74332	9.99488	rol5-c	mcm5U
6.75001	20.383	rol5-c	mcm5U
6.7567	19.6341	rol5-c	mcm5U
6.76339	36.7582	rol5-c	mcm5U
6.77009	44.8468	rol5-c	mcm5U
6.77677	17.4059	rol5-c	mcm5U
6.78347	0	rol5-c	mcm5U
6.79016	31.9919	rol5-c	mcm5U
6.79685	69.4373	rol5-c	mcm5U
6.80354	40.8059	rol5-c	mcm5U
6.81023	3.77564	rol5-c	mcm5U
6.81692	0.006665	rol5-c	mcm5U
6.82362	0.013581	rol5-c	mcm5U
6.83031	0.006714	rol5-c	mcm5U
6.837	0	rol5-c	mcm5U
6.84369	0	rol5-c	mcm5U
6.85038	0	rol5-c	mcm5U
6.85707	0	rol5-c	mcm5U
6.86376	0	rol5-c	mcm5U
6.87046	0	rol5-c	mcm5U
6.87715	13.6573	rol5-c	mcm5U
6.88384	27.8519	rol5-c	mcm5U
6.89053	16.3059	rol5-c	mcm5U
6.89723	5.17558	rol5-c	mcm5U
6.90392	2.55845	rol5-c	mcm5U
6.91061	0	rol5-c	mcm5U
6.91731	15.4391	rol5-c	mcm5U
6.924	31.4857	rol5-c	mcm5U
6.93069	15.5644	rol5-c	mcm5U
6.93738	0	rol5-c	mcm5U
6.94407	0	rol5-c	mcm5U
6.95077	27.1729	rol5-c	mcm5U
6.95746	55.4149	rol5-c	mcm5U
6.96415	52.0524	rol5-c	mcm5U
6.97084	50.2885	rol5-c	mcm5U
6.97753	24.8592	rol5-c	mcm5U
6.98422	0	rol5-c	mcm5U
6.99092	0	rol5-c	mcm5U
6.99761	0	rol5-c	mcm5U
7.0043	0	rol5-c	mcm5U
7.01099	0	rol5-c	mcm5U
7.01768	0	rol5-c	mcm5U
7.02437	0	rol5-c	mcm5U
7.03106	0	rol5-c	mcm5U
7.03775	0	rol5-c	mcm5U
7.04444	0	rol5-c	mcm5U
7.05114	0	rol5-c	mcm5U
7.05783	0	rol5-c	mcm5U
7.06452	0	rol5-c	mcm5U
7.07121	0	rol5-c	mcm5U
7.0779	0	rol5-c	mcm5U
7.0846	0	rol5-c	mcm5U
7.09129	0	rol5-c	mcm5U
7.09799	0	rol5-c	mcm5U
7.10468	0	rol5-c	mcm5U
7.11137	0	rol5-c	mcm5U
7.11806	0	rol5-c	mcm5U
7.12475	0	rol5-c	mcm5U
7.13144	0	rol5-c	mcm5U
7.13813	0	rol5-c	mcm5U
7.14483	0	rol5-c	mcm5U
7.15152	17.6522	rol5-c	mcm5U
7.15821	41.6035	rol5-c	mcm5U
7.16491	29.2251	rol5-c	mcm5U
7.1716	5.65005	rol5-c	mcm5U
7.17829	23.9879	rol5-c	mcm5U
7.18498	48.9198	rol5-c	mcm5U
7.19167	24.1825	rol5-c	mcm5U
7.19837	0	rol5-c	mcm5U
7.20506	3.10763	rol5-c	mcm5U
7.21175	6.36264	rol5-c	mcm5U
7.21844	3.14638	rol5-c	mcm5U
7.22513	0	rol5-c	mcm5U
7.23182	0	rol5-c	mcm5U
7.23852	0	rol5-c	mcm5U
7.24521	0	rol5-c	mcm5U
7.2519	0	rol5-c	mcm5U
7.25859	0	rol5-c	mcm5U
7.26529	0	rol5-c	mcm5U
7.27198	0	rol5-c	mcm5U
7.27867	0	rol5-c	mcm5U
7.28536	0	rol5-c	mcm5U
7.29205	0	rol5-c	mcm5U
7.29874	0	rol5-c	mcm5U
7.30544	0	rol5-c	mcm5U
7.31213	0	rol5-c	mcm5U
7.31882	0	rol5-c	mcm5U
7.32551	0	rol5-c	mcm5U
7.33221	15.9737	rol5-c	mcm5U
7.33889	32.576	rol5-c	mcm5U
7.34559	16.1033	rol5-c	mcm5U
7.35228	0	rol5-c	mcm5U
7.35897	0	rol5-c	mcm5U
7.36567	0	rol5-c	mcm5U
7.37236	0	rol5-c	mcm5U
7.37905	0	rol5-c	mcm5U
7.38574	0	rol5-c	mcm5U
7.39243	0	rol5-c	mcm5U
7.39912	0	rol5-c	mcm5U
7.40581	0	rol5-c	mcm5U
7.4125	0	rol5-c	mcm5U
7.4192	0	rol5-c	mcm5U
7.42589	0	rol5-c	mcm5U
7.43258	0	rol5-c	mcm5U
7.43928	8.02207	rol5-c	mcm5U
7.44597	16.3598	rol5-c	mcm5U
7.45266	8.08715	rol5-c	mcm5U
7.45935	10.137	rol5-c	mcm5U
7.46604	25.7462	rol5-c	mcm5U
7.47274	26.2132	rol5-c	mcm5U
7.47943	16.6321	rol5-c	mcm5U
7.48612	5.69355	rol5-c	mcm5U
7.49281	21.5185	rol5-c	mcm5U
7.49951	62.8497	rol5-c	mcm5U
7.5062	60.3712	rol5-c	mcm5U
7.51289	22.4462	rol5-c	mcm5U
7.51958	18.3165	rol5-c	mcm5U
7.52627	38.5018	rol5-c	mcm5U
7.53297	41.4393	rol5-c	mcm5U
7.53966	24.1583	rol5-c	mcm5U
7.54635	6.14699	rol5-c	mcm5U
7.55304	0	rol5-c	mcm5U
7.55973	0	rol5-c	mcm5U
7.56642	0	rol5-c	mcm5U
7.57311	0	rol5-c	mcm5U
7.5798	10.6007	rol5-c	mcm5U
7.5865	21.6185	rol5-c	mcm5U
7.59319	10.6867	rol5-c	mcm5U
7.59988	0	rol5-c	mcm5U
7.60658	0	rol5-c	mcm5U
7.61327	0	rol5-c	mcm5U
7.61996	0	rol5-c	mcm5U
7.62666	0	rol5-c	mcm5U
7.63335	0	rol5-c	mcm5U
7.64004	12.8286	rol5-c	mcm5U
7.64674	36.6433	rol5-c	mcm5U
7.65343	34.3077	rol5-c	mcm5U
7.66012	10.5663	rol5-c	mcm5U
7.66682	29.3837	rol5-c	mcm5U
7.67351	83.38	rol5-c	mcm5U
7.6802	77.4579	rol5-c	mcm5U
7.68689	23.6468	rol5-c	mcm5U
7.69358	0	rol5-c	mcm5U
7.70027	0	rol5-c	mcm5U
7.70697	17.4817	rol5-c	mcm5U
7.71366	42.9748	rol5-c	mcm5U
7.72035	32.5586	rol5-c	mcm5U
7.72704	9.10516	rol5-c	mcm5U
7.73373	3.51235	rol5-c	mcm5U
7.74042	1.73626	rol5-c	mcm5U
7.74712	0	rol5-c	mcm5U
7.75381	0	rol5-c	mcm5U
7.76051	0	rol5-c	mcm5U
7.7672	0	rol5-c	mcm5U
7.77389	1.88606	rol5-c	mcm5U
7.78058	3.84633	rol5-c	mcm5U
7.78727	1.90136	rol5-c	mcm5U
7.79397	0	rol5-c	mcm5U
7.80066	0	rol5-c	mcm5U
7.80735	0	rol5-c	mcm5U
7.81404	0	rol5-c	mcm5U
7.82073	18.3545	rol5-c	mcm5U
7.82742	37.4311	rol5-c	mcm5U
7.83412	18.5034	rol5-c	mcm5U
7.84081	0	rol5-c	mcm5U
7.8475	0	rol5-c	mcm5U
7.85419	3.09656	rol5-c	mcm5U
7.86088	6.31497	rol5-c	mcm5U
7.86757	3.12168	rol5-c	mcm5U
7.87427	0	rol5-c	mcm5U
7.88096	0	rol5-c	mcm5U
7.88765	0.000376	rol5-c	mcm5U
7.89434	18.4613	rol5-c	mcm5U
7.90103	37.6487	rol5-c	mcm5U
7.90772	18.6109	rol5-c	mcm5U
7.91442	0	rol5-c	mcm5U
7.92111	0	rol5-c	mcm5U
7.9278	0	rol5-c	mcm5U
7.9345	15.2737	rol5-c	mcm5U
7.94119	31.1485	rol5-c	mcm5U
7.94788	37.2386	rol5-c	mcm5U
7.95457	44.5414	rol5-c	mcm5U
7.96127	22.0182	rol5-c	mcm5U
7.96796	6.09972	rol5-c	mcm5U
7.97465	12.4395	rol5-c	mcm5U
7.98134	33.8106	rol5-c	mcm5U
7.98803	56.4112	rol5-c	mcm5U
7.99472	27.8858	rol5-c	mcm5U
8.00142	0	rol5-c	mcm5U
8.00811	0	rol5-c	mcm5U
8.0148	0	rol5-c	mcm5U
8.02149	0	rol5-c	mcm5U
8.02819	1.91105	rol5-c	mcm5U
8.03488	3.89731	rol5-c	mcm5U
8.04157	1.92656	rol5-c	mcm5U
8.04826	0	rol5-c	mcm5U
8.05496	0	rol5-c	mcm5U
8.06165	0	rol5-c	mcm5U
8.06834	0	rol5-c	mcm5U
8.07503	0	rol5-c	mcm5U
8.08173	0	rol5-c	mcm5U
8.08842	0	rol5-c	mcm5U
8.09511	0	rol5-c	mcm5U
8.1018	0	rol5-c	mcm5U
8.1085	0	rol5-c	mcm5U
8.11519	0	rol5-c	mcm5U
8.12187	0	rol5-c	mcm5U
8.12857	0	rol5-c	mcm5U
8.13526	0	rol5-c	mcm5U
8.14195	0	rol5-c	mcm5U
8.14864	0	rol5-c	mcm5U
8.15533	6.1e-05	rol5-c	mcm5U
8.16202	0.000125	rol5-c	mcm5U
8.16872	6.2e-05	rol5-c	mcm5U
8.17541	0	rol5-c	mcm5U
8.1821	0	rol5-c	mcm5U
8.18879	0	rol5-c	mcm5U
8.19548	0	rol5-c	mcm5U
8.20218	0	rol5-c	mcm5U
8.20887	28.7849	rol5-c	mcm5U
8.21556	58.7024	rol5-c	mcm5U
8.22225	57.7615	rol5-c	mcm5U
8.22894	67.0807	rol5-c	mcm5U
8.23563	46.2364	rol5-c	mcm5U
8.24233	64.6089	rol5-c	mcm5U
8.24902	114.36	rol5-c	mcm5U
8.25571	56.5316	rol5-c	mcm5U
8.26241	0	rol5-c	mcm5U
8.2691	0	rol5-c	mcm5U
8.27579	0	rol5-c	mcm5U
8.28248	0	rol5-c	mcm5U
8.28918	0	rol5-c	mcm5U
8.29587	0	rol5-c	mcm5U
8.30256	2.30786	rol5-c	mcm5U
8.30925	15.1029	rol5-c	mcm5U
8.31594	35.5546	rol5-c	mcm5U
8.32263	35.0063	rol5-c	mcm5U
8.32932	13.4186	rol5-c	mcm5U
8.33602	2.64057	rol5-c	mcm5U
8.34271	1.30532	rol5-c	mcm5U
8.3494	0	rol5-c	mcm5U
8.3561	0	rol5-c	mcm5U
8.36279	0	rol5-c	mcm5U
8.36948	0	rol5-c	mcm5U
8.37617	0	rol5-c	mcm5U
8.38287	46.7006	rol5-c	mcm5U
8.38956	95.2388	rol5-c	mcm5U
8.39624	47.0795	rol5-c	mcm5U
8.40294	0	rol5-c	mcm5U
8.40963	0	rol5-c	mcm5U
8.41632	0	rol5-c	mcm5U
8.42302	0	rol5-c	mcm5U
8.42971	0	rol5-c	mcm5U
8.4364	0	rol5-c	mcm5U
8.44309	0	rol5-c	mcm5U
8.44979	0	rol5-c	mcm5U
8.45648	15.2366	rol5-c	mcm5U
8.46317	31.0727	rol5-c	mcm5U
8.46987	15.3602	rol5-c	mcm5U
8.47656	35.3669	rol5-c	mcm5U
8.48325	94.9264	rol5-c	mcm5U
8.48994	147.775	rol5-c	mcm5U
8.49663	183.811	rol5-c	mcm5U
8.50332	120.99	rol5-c	mcm5U
8.51002	145.485	rol5-c	mcm5U
8.51671	312.053	rol5-c	mcm5U
8.5234	314.467	rol5-c	mcm5U
8.53009	459.874	rol5-c	mcm5U
8.53678	849.523	rol5-c	mcm5U
8.54347	966.221	rol5-c	mcm5U
8.55017	1207.72	rol5-c	mcm5U
8.55686	1868.81	rol5-c	mcm5U
8.56356	2334.24	rol5-c	mcm5U
8.57025	2536.16	rol5-c	mcm5U
8.57694	2876.93	rol5-c	mcm5U
8.58364	3479.89	rol5-c	mcm5U
8.59034	4025.42	rol5-c	mcm5U
8.59703	4489.27	rol5-c	mcm5U
8.60372	5212.3	rol5-c	mcm5U
8.61042	5625.35	rol5-c	mcm5U
8.61711	5355.58	rol5-c	mcm5U
8.6238	5559.3	rol5-c	mcm5U
8.63049	6159.43	rol5-c	mcm5U
8.63718	6117.14	rol5-c	mcm5U
8.64387	6212.82	rol5-c	mcm5U
8.65057	6131.4	rol5-c	mcm5U
8.65726	5439.53	rol5-c	mcm5U
8.66395	4771.59	rol5-c	mcm5U
8.67064	4389.47	rol5-c	mcm5U
8.67733	4230.7	rol5-c	mcm5U
8.68402	3492.37	rol5-c	mcm5U
8.69071	2873.23	rol5-c	mcm5U
8.6974	2654.05	rol5-c	mcm5U
8.70409	2135.63	rol5-c	mcm5U
8.71079	1799.8	rol5-c	mcm5U
8.71748	1724.19	rol5-c	mcm5U
8.72417	1407.33	rol5-c	mcm5U
8.73087	1135.61	rol5-c	mcm5U
8.73756	978.767	rol5-c	mcm5U
8.74425	633.287	rol5-c	mcm5U
8.75094	427.589	rol5-c	mcm5U
8.75764	445.5	rol5-c	mcm5U
8.76433	343.64	rol5-c	mcm5U
8.77102	271.194	rol5-c	mcm5U
8.77771	328.775	rol5-c	mcm5U
8.7844	290.529	rol5-c	mcm5U
8.79109	166.443	rol5-c	mcm5U
8.79779	95.1669	rol5-c	mcm5U
8.80448	58.171	rol5-c	mcm5U
8.81117	60.1411	rol5-c	mcm5U
8.81787	87.5783	rol5-c	mcm5U
8.82456	80.7494	rol5-c	mcm5U
8.83125	64.4256	rol5-c	mcm5U
8.83794	73.2669	rol5-c	mcm5U
8.84463	50.9638	rol5-c	mcm5U
8.85132	82.3456	rol5-c	mcm5U
8.85802	188.644	rol5-c	mcm5U
8.86471	177.372	rol5-c	mcm5U
8.8714	121.255	rol5-c	mcm5U
8.87809	144.676	rol5-c	mcm5U
8.88479	130.521	rol5-c	mcm5U
8.89148	86.7427	rol5-c	mcm5U
8.89818	52.6954	rol5-c	mcm5U
8.90487	25.9528	rol5-c	mcm5U
8.91156	25.3602	rol5-c	mcm5U
8.91825	16.1006	rol5-c	mcm5U
8.92495	2.32567	rol5-c	mcm5U
8.93164	14.7195	rol5-c	mcm5U
8.93834	51.5512	rol5-c	mcm5U
8.94503	76.2499	rol5-c	mcm5U
8.95172	60.658	rol5-c	mcm5U
8.95842	32.7943	rol5-c	mcm5U
8.96511	21.6227	rol5-c	mcm5U
8.9718	36.524	rol5-c	mcm5U
8.97849	79.0629	rol5-c	mcm5U
8.98519	87.0993	rol5-c	mcm5U
8.99188	53.0961	rol5-c	mcm5U
8.99858	32.9079	rol5-c	mcm5U
9.00527	26.677	rol5-c	mcm5U
9.01196	27.3978	rol5-c	mcm5U
9.01865	57.2819	rol5-c	mcm5U
9.02534	95.9002	rol5-c	mcm5U
9.03204	87.7392	rol5-c	mcm5U
9.03873	31.7229	rol5-c	mcm5U
9.04542	32.3108	rol5-c	mcm5U
9.05211	65.893	rol5-c	mcm5U
9.0588	32.5729	rol5-c	mcm5U
9.06549	5.07007	rol5-c	mcm5U
9.07219	10.3396	rol5-c	mcm5U
9.07888	8.45551	rol5-c	mcm5U
9.08557	18.8011	rol5-c	mcm5U
9.09226	34.7278	rol5-c	mcm5U
9.09896	47.0118	rol5-c	mcm5U
9.10565	49.4283	rol5-c	mcm5U
9.11234	20.9838	rol5-c	mcm5U
9.11903	8.43518	rol5-c	mcm5U
9.12572	17.2023	rol5-c	mcm5U
9.13242	8.50361	rol5-c	mcm5U
9.13912	17.1531	rol5-c	mcm5U
9.14581	35.5322	rol5-c	mcm5U
9.1525	18.8783	rol5-c	mcm5U
9.15919	2.34101	rol5-c	mcm5U
9.16589	1.15723	rol5-c	mcm5U
9.17258	0	rol5-c	mcm5U
9.17927	0	rol5-c	mcm5U
9.18597	6.54375	rol5-c	mcm5U
9.19266	13.345	rol5-c	mcm5U
9.19935	6.59684	rol5-c	mcm5U
9.20604	0	rol5-c	mcm5U
9.21273	0	rol5-c	mcm5U
9.21942	3.48477	rol5-c	mcm5U
9.22611	7.10667	rol5-c	mcm5U
9.23281	3.51304	rol5-c	mcm5U
9.2395	0	rol5-c	mcm5U
9.24619	0	rol5-c	mcm5U
9.25288	0	rol5-c	mcm5U
9.25957	0	rol5-c	mcm5U
9.26626	0	rol5-c	mcm5U
9.27296	0	rol5-c	mcm5U
9.27965	0	rol5-c	mcm5U
9.28634	0	rol5-c	mcm5U
9.29304	0	rol5-c	mcm5U
9.29973	0	rol5-c	mcm5U
9.30642	0	rol5-c	mcm5U
9.31312	0	rol5-c	mcm5U
9.31981	0	rol5-c	mcm5U
9.3265	8.7249	rol5-c	mcm5U
9.33319	17.7931	rol5-c	mcm5U
9.33988	13.0009	rol5-c	mcm5U
9.34657	8.57592	rol5-c	mcm5U
9.35326	4.23934	rol5-c	mcm5U
9.35996	0	rol5-c	mcm5U
9.36665	4.59561	rol5-c	mcm5U
9.37334	21.9398	rol5-c	mcm5U
9.38003	29.3455	rol5-c	mcm5U
9.38672	12.0532	rol5-c	mcm5U
9.39342	0	rol5-c	mcm5U
9.40011	0	rol5-c	mcm5U
9.4068	0	rol5-c	mcm5U
9.41349	0	rol5-c	mcm5U
9.42019	0	rol5-c	mcm5U
9.42687	0	rol5-c	mcm5U
9.43357	0	rol5-c	mcm5U
9.44026	0	rol5-c	mcm5U
9.44695	0	rol5-c	mcm5U
9.45364	0	rol5-c	mcm5U
9.46033	0	rol5-c	mcm5U
9.46702	0	rol5-c	mcm5U
9.47371	0	rol5-c	mcm5U
9.4804	0	rol5-c	mcm5U
9.48709	0	rol5-c	mcm5U
9.49378	0	rol5-c	mcm5U
9.50048	0	rol5-c	mcm5U
9.50717	0	rol5-c	mcm5U
9.51386	0	rol5-c	mcm5U
9.52056	0	rol5-c	mcm5U
9.52725	0	rol5-c	mcm5U
9.53394	0	rol5-c	mcm5U
9.54063	0	rol5-c	mcm5U
9.54732	0	rol5-c	mcm5U
9.55402	0	rol5-c	mcm5U
9.56071	0	rol5-c	mcm5U
9.5674	0	rol5-c	mcm5U
9.57409	0	rol5-c	mcm5U
9.58078	0	rol5-c	mcm5U
9.58748	0	rol5-c	mcm5U
9.59417	0	rol5-c	mcm5U
9.60087	0	rol5-c	mcm5U
9.60756	1.01256	rol5-c	mcm5U
9.61425	2.06496	rol5-c	mcm5U
9.62094	1.02077	rol5-c	mcm5U
9.62763	0	rol5-c	mcm5U
9.63432	0	rol5-c	mcm5U
9.64101	0	rol5-c	mcm5U
9.64771	7.17617	rol5-c	mcm5U
9.6544	14.6347	rol5-c	mcm5U
9.66109	7.23439	rol5-c	mcm5U
9.66779	15.5483	rol5-c	mcm5U
9.67448	32.7284	rol5-c	mcm5U
9.68117	16.4855	rol5-c	mcm5U
9.68786	0	rol5-c	mcm5U
9.69456	0	rol5-c	mcm5U
9.70125	0	rol5-c	mcm5U
9.70794	0	rol5-c	mcm5U
9.71463	19.0486	rol5-c	mcm5U
9.72132	38.8467	rol5-c	mcm5U
9.72801	28.9309	rol5-c	mcm5U
9.7347	35.456	rol5-c	mcm5U
9.74139	41.6567	rol5-c	mcm5U
9.74809	17.8518	rol5-c	mcm5U
9.75478	14.2111	rol5-c	mcm5U
9.76147	22.3414	rol5-c	mcm5U
9.76817	20.1956	rol5-c	mcm5U
9.77486	20.805	rol5-c	mcm5U
9.78155	10.2845	rol5-c	mcm5U
9.78824	1.07997	rol5-c	mcm5U
9.79493	2.20243	rol5-c	mcm5U
9.80162	1.08873	rol5-c	mcm5U
9.80832	0	rol5-c	mcm5U
9.81501	0	rol5-c	mcm5U
9.82169	0	rol5-c	mcm5U
9.82839	1.04426	rol5-c	mcm5U
9.83508	2.12961	rol5-c	mcm5U
9.84177	1.05273	rol5-c	mcm5U
9.84847	0	rol5-c	mcm5U
9.85516	0	rol5-c	mcm5U
9.86185	0	rol5-c	mcm5U
9.86854	0	rol5-c	mcm5U
9.87523	0	rol5-c	mcm5U
9.88192	0	rol5-c	mcm5U
9.88861	0.000289	rol5-c	mcm5U
9.8953	0.000589	rol5-c	mcm5U
9.90199	0.000291	rol5-c	mcm5U
9.90869	0	rol5-c	mcm5U
9.91539	0	rol5-c	mcm5U
9.92208	0	rol5-c	mcm5U
9.92877	0	rol5-c	mcm5U
9.93547	0.000457	rol5-c	mcm5U
9.94216	0.000933	rol5-c	mcm5U
9.94885	0.000461	rol5-c	mcm5U
9.95554	0	rol5-c	mcm5U
9.96223	0	rol5-c	mcm5U
9.96892	0	rol5-c	mcm5U
9.97562	0	rol5-c	mcm5U
9.98231	26.146	rol5-c	mcm5U
9.989	57.9721	rol5-c	mcm5U
9.99569	35.8437	rol5-c	mcm5U
10.0024	28.3318	rol5-c	mcm5U
10.0091	48.2158	rol5-c	mcm5U
10.0158	23.8346	rol5-c	mcm5U
10.0225	37.2312	rol5-c	mcm5U
10.0292	75.9274	rol5-c	mcm5U
10.0358	37.5332	rol5-c	mcm5U
10.0425	0	rol5-c	mcm5U
10.0492	9.09406	rol5-c	mcm5U
10.0559	18.546	rol5-c	mcm5U
10.0626	9.16784	rol5-c	mcm5U
10.0693	0	rol5-c	mcm5U
10.076	0	rol5-c	mcm5U
10.0827	0	rol5-c	mcm5U
10.0894	0	rol5-c	mcm5U
10.0961	0	rol5-c	mcm5U
10.1028	8.762	rol5-c	mcm5U
10.1095	17.8688	rol5-c	mcm5U
10.1162	26.9019	rol5-c	mcm5U
10.1228	36.8486	rol5-c	mcm5U
10.1295	18.2155	rol5-c	mcm5U
10.1362	9.2e-05	rol5-c	mcm5U
10.1429	23.1797	rol5-c	mcm5U
10.1496	47.2715	rol5-c	mcm5U
10.1563	23.3677	rol5-c	mcm5U
10.163	0	rol5-c	mcm5U
10.1697	19.9267	rol5-c	mcm5U
10.1764	40.6375	rol5-c	mcm5U
10.1831	20.0884	rol5-c	mcm5U
10.1898	0	rol5-c	mcm5U
10.1965	26.3711	rol5-c	mcm5U
10.2032	53.7798	rol5-c	mcm5U
10.2098	26.585	rol5-c	mcm5U
10.2165	0	rol5-c	mcm5U
10.2232	0	rol5-c	mcm5U
10.2299	0	rol5-c	mcm5U
10.2366	0	rol5-c	mcm5U
10.2433	0	rol5-c	mcm5U
10.25	0	rol5-c	mcm5U
10.2567	28.2491	rol5-c	mcm5U
10.2634	57.6098	rol5-c	mcm5U
10.2701	35.8786	rol5-c	mcm5U
10.2768	15.0919	rol5-c	mcm5U
10.2835	7.46037	rol5-c	mcm5U
10.2902	6.92418	rol5-c	mcm5U
10.2968	14.1208	rol5-c	mcm5U
10.3035	11.395	rol5-c	mcm5U
10.3102	9.00296	rol5-c	mcm5U
10.3169	4.45044	rol5-c	mcm5U
10.3236	0	rol5-c	mcm5U
10.3303	0	rol5-c	mcm5U
10.337	0	rol5-c	mcm5U
10.3437	0	rol5-c	mcm5U
10.3504	0	rol5-c	mcm5U
10.3571	0	rol5-c	mcm5U
10.3638	0	rol5-c	mcm5U
10.3705	0	rol5-c	mcm5U
10.3772	0	rol5-c	mcm5U
10.3838	0.000358	rol5-c	mcm5U
10.3905	0.00073	rol5-c	mcm5U
10.3972	0.000361	rol5-c	mcm5U
10.4039	12.2963	rol5-c	mcm5U
10.4106	25.0765	rol5-c	mcm5U
10.4173	12.3961	rol5-c	mcm5U
10.424	0	rol5-c	mcm5U
10.4307	0	rol5-c	mcm5U
10.4374	0	rol5-c	mcm5U
10.4441	0	rol5-c	mcm5U
10.4508	0	rol5-c	mcm5U
10.4575	0	rol5-c	mcm5U
10.4642	0	rol5-c	mcm5U
10.4709	4.29918	rol5-c	mcm5U
10.4775	8.76753	rol5-c	mcm5U
10.4842	15.8223	rol5-c	mcm5U
10.4909	34.8064	rol5-c	mcm5U
10.4976	34.7848	rol5-c	mcm5U
10.5043	18.7572	rol5-c	mcm5U
10.511	19.6958	rol5-c	mcm5U
10.5177	17.2063	rol5-c	mcm5U
10.5244	4.87417	rol5-c	mcm5U
10.5311	0	rol5-c	mcm5U
10.5378	0	rol5-c	mcm5U
10.5445	0	rol5-c	mcm5U
10.5512	0	rol5-c	mcm5U
10.5579	0.000263	rol5-c	mcm5U
10.5645	0.000536	rol5-c	mcm5U
10.5712	0.000265	rol5-c	mcm5U
10.5779	0	rol5-c	mcm5U
10.5846	0	rol5-c	mcm5U
10.5913	11.6519	rol5-c	mcm5U
10.598	23.7623	rol5-c	mcm5U
10.6047	24.6477	rol5-c	mcm5U
10.6114	26.3101	rol5-c	mcm5U
10.6181	13.0059	rol5-c	mcm5U
10.6248	0	rol5-c	mcm5U
10.6315	0	rol5-c	mcm5U
10.6382	0	rol5-c	mcm5U
10.6449	0	rol5-c	mcm5U
10.6516	17.6198	rol5-c	mcm5U
10.6583	35.9328	rol5-c	mcm5U
10.6649	17.7627	rol5-c	mcm5U
10.6716	0	rol5-c	mcm5U
10.6783	11.8549	rol5-c	mcm5U
10.685	24.1762	rol5-c	mcm5U
10.6917	11.951	rol5-c	mcm5U
10.6984	0	rol5-c	mcm5U
10.7051	0	rol5-c	mcm5U
10.7118	5.58843	rol5-c	mcm5U
10.7185	11.3968	rol5-c	mcm5U
10.7252	5.63377	rol5-c	mcm5U
10.7319	9.66584	rol5-c	mcm5U
10.7386	19.712	rol5-c	mcm5U
10.7453	16.0912	rol5-c	mcm5U
10.752	12.9437	rol5-c	mcm5U
10.7586	18.0884	rol5-c	mcm5U
10.7653	23.8399	rol5-c	mcm5U
10.772	12.929	rol5-c	mcm5U
10.7787	2.33339	rol5-c	mcm5U
10.7854	1.15347	rol5-c	mcm5U
10.7921	0	rol5-c	mcm5U
10.7988	0	rol5-c	mcm5U
10.8055	0	rol5-c	mcm5U
10.8122	0	rol5-c	mcm5U
10.8189	0	rol5-c	mcm5U
10.8256	0	rol5-c	mcm5U
10.8323	0	rol5-c	mcm5U
10.839	0	rol5-c	mcm5U
10.8456	0	rol5-c	mcm5U
10.8523	0	rol5-c	mcm5U
10.859	0	rol5-c	mcm5U
10.8657	0	rol5-c	mcm5U
10.8724	0	rol5-c	mcm5U
10.8791	0	rol5-c	mcm5U
10.8858	0	rol5-c	mcm5U
10.8925	0	rol5-c	mcm5U
10.8992	0	rol5-c	mcm5U
10.9059	0	rol5-c	mcm5U
10.9126	0	rol5-c	mcm5U
10.9193	0	rol5-c	mcm5U
10.926	0	rol5-c	mcm5U
10.9326	0	rol5-c	mcm5U
10.9393	0	rol5-c	mcm5U
10.946	0	rol5-c	mcm5U
10.9527	8.3725	rol5-c	mcm5U
10.9594	17.0745	rol5-c	mcm5U
10.9661	8.44043	rol5-c	mcm5U
10.9728	0	rol5-c	mcm5U
10.9795	0	rol5-c	mcm5U
10.9862	0	rol5-c	mcm5U
10.9929	0	rol5-c	mcm5U
10.9996	0	rol5-c	mcm5U
11.0063	0	rol5-c	mcm5U
11.0129	0	rol5-c	mcm5U
11.0196	0	rol5-c	mcm5U
11.0263	0	rol5-c	mcm5U
11.033	0	rol5-c	mcm5U
11.0397	0	rol5-c	mcm5U
11.0464	0	rol5-c	mcm5U
11.0531	0	rol5-c	mcm5U
11.0598	0	rol5-c	mcm5U
11.0665	0	rol5-c	mcm5U
11.0732	0	rol5-c	mcm5U
11.0799	0	rol5-c	mcm5U
11.0866	0	rol5-c	mcm5U
11.0933	0	rol5-c	mcm5U
11.1	0	rol5-c	mcm5U
11.1066	0	rol5-c	mcm5U
11.1133	0	rol5-c	mcm5U
11.12	0	rol5-c	mcm5U
11.1267	0	rol5-c	mcm5U
11.1334	0	rol5-c	mcm5U
11.1401	0	rol5-c	mcm5U
11.1468	0	rol5-c	mcm5U
11.1535	0	rol5-c	mcm5U
11.1602	0	rol5-c	mcm5U
11.1669	0	rol5-c	mcm5U
11.1736	0	rol5-c	mcm5U
11.1803	0	rol5-c	mcm5U
11.187	0	rol5-c	mcm5U
11.1936	0	rol5-c	mcm5U
11.2003	0	rol5-c	mcm5U
11.207	0.000196	rol5-c	mcm5U
11.2137	0.0004	rol5-c	mcm5U
11.2204	0.000197	rol5-c	mcm5U
11.2271	0	rol5-c	mcm5U
11.2338	30.494	rol5-c	mcm5U
11.2405	62.1879	rol5-c	mcm5U
11.2472	30.7414	rol5-c	mcm5U
11.2539	0	rol5-c	mcm5U
11.2606	0	rol5-c	mcm5U
11.2673	0	rol5-c	mcm5U
11.274	0	rol5-c	mcm5U
11.2807	0	rol5-c	mcm5U
11.2873	0	rol5-c	mcm5U
11.294	0	rol5-c	mcm5U
11.3007	0	rol5-c	mcm5U
11.3074	0	rol5-c	mcm5U
11.3141	0	rol5-c	mcm5U
11.3208	0	rol5-c	mcm5U
11.3275	23.1078	rol5-c	mcm5U
11.3342	47.1248	rol5-c	mcm5U
11.3409	67.5841	rol5-c	mcm5U
11.3476	90.3204	rol5-c	mcm5U
11.3543	44.6481	rol5-c	mcm5U
11.361	0	rol5-c	mcm5U
11.3677	0.00055	rol5-c	mcm5U
11.3743	0.001122	rol5-c	mcm5U
11.381	0.000554	rol5-c	mcm5U
11.3877	0	rol5-c	mcm5U
11.3944	0	rol5-c	mcm5U
11.4011	0	rol5-c	mcm5U
11.4078	0	rol5-c	mcm5U
11.4145	0	rol5-c	mcm5U
11.4212	0	rol5-c	mcm5U
11.4279	0	rol5-c	mcm5U
11.4346	0	rol5-c	mcm5U
11.4413	0	rol5-c	mcm5U
11.448	0	rol5-c	mcm5U
11.4546	0	rol5-c	mcm5U
11.4613	0	rol5-c	mcm5U
11.468	0	rol5-c	mcm5U
11.4747	0	rol5-c	mcm5U
11.4814	0	rol5-c	mcm5U
11.4881	0	rol5-c	mcm5U
11.4948	0	rol5-c	mcm5U
11.5015	0	rol5-c	mcm5U
11.5082	0	rol5-c	mcm5U
11.5149	0	rol5-c	mcm5U
11.5216	3.26611	rol5-c	mcm5U
11.5283	19.561	rol5-c	mcm5U
11.535	29.6007	rol5-c	mcm5U
11.5416	13.0049	rol5-c	mcm5U
11.5483	0	rol5-c	mcm5U
11.555	45.6189	rol5-c	mcm5U
11.5617	93.0327	rol5-c	mcm5U
11.5684	45.9889	rol5-c	mcm5U
11.5751	0	rol5-c	mcm5U
11.5818	0	rol5-c	mcm5U
11.5885	0	rol5-c	mcm5U
11.5952	0	rol5-c	mcm5U
11.6019	0	rol5-c	mcm5U
11.6086	0	rol5-c	mcm5U
11.6153	0	rol5-c	mcm5U
11.622	0	rol5-c	mcm5U
11.6286	0	rol5-c	mcm5U
11.6353	0	rol5-c	mcm5U
11.642	11.5316	rol5-c	mcm5U
11.6487	58.0743	rol5-c	mcm5U
11.6554	82.0995	rol5-c	mcm5U
11.6621	34.8376	rol5-c	mcm5U
11.6688	0	rol5-c	mcm5U
11.6755	0	rol5-c	mcm5U
11.6822	5.85048	rol5-c	mcm5U
11.6889	11.9312	rol5-c	mcm5U
11.6956	5.89794	rol5-c	mcm5U
11.7023	5.11289	rol5-c	mcm5U
11.709	10.427	rol5-c	mcm5U
11.7157	18.9976	rol5-c	mcm5U
11.7223	28.2312	rol5-c	mcm5U
11.729	13.9555	rol5-c	mcm5U
11.7357	0	rol5-c	mcm5U
11.7424	0	rol5-c	mcm5U
11.7491	14.4265	rol5-c	mcm5U
11.7558	63.376	rol5-c	mcm5U
11.7625	98.4774	rol5-c	mcm5U
11.7692	84.2899	rol5-c	mcm5U
11.7759	55.8117	rol5-c	mcm5U
11.7826	20.2703	rol5-c	mcm5U
11.7893	19.3031	rol5-c	mcm5U
11.796	39.3657	rol5-c	mcm5U
11.8026	19.4597	rol5-c	mcm5U
11.8093	0	rol5-c	mcm5U
11.816	0	rol5-c	mcm5U
11.8227	0	rol5-c	mcm5U
11.8294	0	rol5-c	mcm5U
11.8361	0	rol5-c	mcm5U
11.8428	11.2373	rol5-c	mcm5U
11.8495	22.9168	rol5-c	mcm5U
11.8562	11.3285	rol5-c	mcm5U
11.8629	0	rol5-c	mcm5U
11.8696	0	rol5-c	mcm5U
11.8763	0	rol5-c	mcm5U
11.8829	0	rol5-c	mcm5U
11.8896	0	rol5-c	mcm5U
11.8963	0	rol5-c	mcm5U
11.903	0	rol5-c	mcm5U
11.9097	0	rol5-c	mcm5U
11.9164	0	rol5-c	mcm5U
11.9231	0	rol5-c	mcm5U
11.9298	0	rol5-c	mcm5U
11.9365	0	rol5-c	mcm5U
11.9432	7.65364	rol5-c	mcm5U
11.9499	15.6084	rol5-c	mcm5U
11.9566	17.3532	rol5-c	mcm5U
11.9632	19.6542	rol5-c	mcm5U
11.9699	9.7157	rol5-c	mcm5U
11.9766	0	rol5-c	mcm5U
11.9833	0	rol5-c	mcm5U
11.99	8.59388	rol5-c	mcm5U
11.9967	17.5259	rol5-c	mcm5U
12.0034	8.66361	rol5-c	mcm5U
12.0101	0	rol5-c	mcm5U
12.0168	0	rol5-c	mcm5U
12.0235	0	rol5-c	mcm5U
12.0302	0	rol5-c	mcm5U
12.0369	0	rol5-c	mcm5U
12.0435	0	rol5-c	mcm5U
12.0502	0	rol5-c	mcm5U
12.0569	0	rol5-c	mcm5U
12.0636	0	rol5-c	mcm5U
12.0703	0	rol5-c	mcm5U
12.077	0	rol5-c	mcm5U
12.0837	0	rol5-c	mcm5U
12.0904	0	rol5-c	mcm5U
12.0971	0	rol5-c	mcm5U
12.1038	0	rol5-c	mcm5U
12.1105	0	rol5-c	mcm5U
12.1172	0	rol5-c	mcm5U
12.1239	0	rol5-c	mcm5U
12.1306	0	rol5-c	mcm5U
12.1372	0	rol5-c	mcm5U
12.1439	0	rol5-c	mcm5U
12.1506	0	rol5-c	mcm5U
12.1573	0	rol5-c	mcm5U
12.164	0	rol5-c	mcm5U
12.1707	0	rol5-c	mcm5U
12.1774	0	rol5-c	mcm5U
12.1841	0	rol5-c	mcm5U
12.1908	0	rol5-c	mcm5U
12.1975	0	rol5-c	mcm5U
12.2042	0	rol5-c	mcm5U
12.2109	18.4809	rol5-c	mcm5U
12.2176	37.689	rol5-c	mcm5U
12.2243	18.6308	rol5-c	mcm5U
12.2309	4.23071	rol5-c	mcm5U
12.2376	8.6279	rol5-c	mcm5U
12.2443	4.26504	rol5-c	mcm5U
12.251	0	rol5-c	mcm5U
12.2577	0	rol5-c	mcm5U
12.2644	0	rol5-c	mcm5U
12.2711	0	rol5-c	mcm5U
12.2778	4.70993	rol5-c	mcm5U
12.2845	9.60519	rol5-c	mcm5U
12.2912	4.74814	rol5-c	mcm5U
12.2979	0	rol5-c	mcm5U
12.3046	0	rol5-c	mcm5U
12.3113	0	rol5-c	mcm5U
12.318	0	rol5-c	mcm5U
12.3246	0	rol5-c	mcm5U
12.3313	0	rol5-c	mcm5U
12.338	0	rol5-c	mcm5U
12.3447	0	rol5-c	mcm5U
12.3514	0	rol5-c	mcm5U
12.3581	0	rol5-c	mcm5U
12.3648	0	rol5-c	mcm5U
12.3715	0	rol5-c	mcm5U
12.3782	0	rol5-c	mcm5U
12.3849	0	rol5-c	mcm5U
12.3916	0	rol5-c	mcm5U
12.3983	0	rol5-c	mcm5U
12.405	0	rol5-c	mcm5U
12.4116	0	rol5-c	mcm5U
12.4183	0	rol5-c	mcm5U
12.425	0	rol5-c	mcm5U
12.4317	0	rol5-c	mcm5U
12.4384	0	rol5-c	mcm5U
12.4451	0	rol5-c	mcm5U
12.4518	0	rol5-c	mcm5U
12.4585	0	rol5-c	mcm5U
12.4652	0	rol5-c	mcm5U
12.4719	0	rol5-c	mcm5U
12.4786	0	rol5-c	mcm5U
12.4853	0.000365	rol5-c	mcm5U
12.4919	0.000743	rol5-c	mcm5U
12.4986	0.000367	rol5-c	mcm5U
12.5053	0	rol5-c	mcm5U
12.512	0	rol5-c	mcm5U
12.5187	0	rol5-c	mcm5U
12.5254	0	rol5-c	mcm5U
12.5321	0	rol5-c	mcm5U
12.5388	0	rol5-c	mcm5U
12.5455	0	rol5-c	mcm5U
12.5522	0	rol5-c	mcm5U
12.5589	0	rol5-c	mcm5U
12.5656	0	rol5-c	mcm5U
12.5723	0	rol5-c	mcm5U
12.579	0	rol5-c	mcm5U
12.5856	0	rol5-c	mcm5U
12.5923	0	rol5-c	mcm5U
12.599	0	rol5-c	mcm5U
12.6057	0	rol5-c	mcm5U
12.6124	0	rol5-c	mcm5U
12.6191	0	rol5-c	mcm5U
12.6258	0	rol5-c	mcm5U
12.6325	0	rol5-c	mcm5U
12.6392	0	rol5-c	mcm5U
12.6459	1.18022	rol5-c	mcm5U
12.6526	2.40688	rol5-c	mcm5U
12.6593	4.35875	rol5-c	mcm5U
12.6659	6.4626	rol5-c	mcm5U
12.6726	3.19466	rol5-c	mcm5U
12.6793	0	rol5-c	mcm5U
12.686	0	rol5-c	mcm5U
12.6927	0	rol5-c	mcm5U
12.6994	0	rol5-c	mcm5U
12.7061	0	rol5-c	mcm5U
12.7128	10.259	rol5-c	mcm5U
12.7195	20.9216	rol5-c	mcm5U
12.7262	12.9143	rol5-c	mcm5U
12.7329	19.4679	rol5-c	mcm5U
12.7396	41.5603	rol5-c	mcm5U
12.7463	36.7647	rol5-c	mcm5U
12.753	17.2694	rol5-c	mcm5U
12.7597	8.16243	rol5-c	mcm5U
12.7663	3.00559	rol5-c	mcm5U
12.773	0	rol5-c	mcm5U
12.7797	33.718	rol5-c	mcm5U
12.7864	68.7627	rol5-c	mcm5U
12.7931	33.9915	rol5-c	mcm5U
12.7998	0	rol5-c	mcm5U
12.8065	0	rol5-c	mcm5U
12.8132	0	rol5-c	mcm5U
12.8199	0	rol5-c	mcm5U
12.8266	0	rol5-c	mcm5U
12.8333	0	rol5-c	mcm5U
12.84	0	rol5-c	mcm5U
12.8467	0	rol5-c	mcm5U
12.8533	0	rol5-c	mcm5U
12.86	0	rol5-c	mcm5U
12.8667	0	rol5-c	mcm5U
12.8734	0	rol5-c	mcm5U
12.8801	0	rol5-c	mcm5U
12.8868	0	rol5-c	mcm5U
12.8935	0	rol5-c	mcm5U
12.9002	0	rol5-c	mcm5U
12.9069	0	rol5-c	mcm5U
12.9136	0	rol5-c	mcm5U
12.9203	0	rol5-c	mcm5U
12.927	0	rol5-c	mcm5U
12.9337	0	rol5-c	mcm5U
12.9404	0	rol5-c	mcm5U
12.947	0	rol5-c	mcm5U
12.9537	0	rol5-c	mcm5U
12.9604	19.492	rol5-c	mcm5U
12.9671	39.751	rol5-c	mcm5U
12.9738	19.6502	rol5-c	mcm5U
12.9805	0	rol5-c	mcm5U
12.9872	16.0325	rol5-c	mcm5U
12.9939	32.6959	rol5-c	mcm5U
13.0006	16.1626	rol5-c	mcm5U
13.0073	9.32732	rol5-c	mcm5U
13.014	34.8404	rol5-c	mcm5U
13.0207	41.6629	rol5-c	mcm5U
13.0274	15.9471	rol5-c	mcm5U
13.0341	0	rol5-c	mcm5U
13.0408	0	rol5-c	mcm5U
13.0474	0	rol5-c	mcm5U
13.0541	0	rol5-c	mcm5U
13.0608	16.3193	rol5-c	mcm5U
13.0675	33.2807	rol5-c	mcm5U
13.0742	16.4517	rol5-c	mcm5U
13.0809	0	rol5-c	mcm5U
13.0876	0	rol5-c	mcm5U
13.0943	0	rol5-c	mcm5U
13.101	7.00573	rol5-c	mcm5U
13.1077	42.138	rol5-c	mcm5U
13.1144	63.8601	rol5-c	mcm5U
13.1211	48.3692	rol5-c	mcm5U
13.1278	55.2137	rol5-c	mcm5U
13.1345	61.7093	rol5-c	mcm5U
13.1411	56.9285	rol5-c	mcm5U
13.1478	59.9356	rol5-c	mcm5U
13.1545	43.7367	rol5-c	mcm5U
13.1612	35.6953	rol5-c	mcm5U
13.1679	45.3954	rol5-c	mcm5U
13.1746	22.4403	rol5-c	mcm5U
13.1813	37.9141	rol5-c	mcm5U
13.188	89.4112	rol5-c	mcm5U
13.1947	69.6902	rol5-c	mcm5U
13.2014	44.0911	rol5-c	mcm5U
13.2081	86.305	rol5-c	mcm5U
13.2148	110.724	rol5-c	mcm5U
13.2214	86.5775	rol5-c	mcm5U
13.2281	121.5	rol5-c	mcm5U
13.2348	146.962	rol5-c	mcm5U
13.2415	164.738	rol5-c	mcm5U
13.2482	224.347	rol5-c	mcm5U
13.2549	142.059	rol5-c	mcm5U
13.2616	51.8081	rol5-c	mcm5U
13.2683	88.6136	rol5-c	mcm5U
13.275	88.9657	rol5-c	mcm5U
13.2817	29.4671	rol5-c	mcm5U
13.2884	0	rol5-c	mcm5U
13.2951	23.9473	rol5-c	mcm5U
13.3018	48.8369	rol5-c	mcm5U
13.3084	29.3612	rol5-c	mcm5U
13.3151	23.1931	rol5-c	mcm5U
13.3218	49.9817	rol5-c	mcm5U
13.3285	96.5116	rol5-c	mcm5U
13.3352	130.257	rol5-c	mcm5U
13.3419	105.336	rol5-c	mcm5U
13.3486	59.7587	rol5-c	mcm5U
13.3553	55.7034	rol5-c	mcm5U
13.362	114.857	rol5-c	mcm5U
13.3687	149.577	rol5-c	mcm5U
13.3754	102.402	rol5-c	mcm5U
[truncated: 33,873 more rows]
