# Supplementary material for: The tRNA thiolation-mediated translational control is essential for plant immunity
Source: eLife. 2024 Jan 29;13:e93517. doi: 10.7554/eLife.93517 (PMC10863982; doi:10.7554/eLife.93517)
Supplement: Figure 4—source data 1. [file elife-93517-fig4-data1.xlsx]

## Sheet: DEG_COM
The differentially expressed genes after Psm infection in the cgb mutant and its complementation line.
TAIR_Locus	Symbol	Annotation	Log2FoldChange	pvalue	UP_or_DOWN_regulated
AT1G73260	ATKTI1	Encodes a trypsin inhibitor involved in modulating programmed cell death in plant-pathogen interactions.	9.90423	5.88195e-149	UP
AT3G12230	NA	NA	9.43745	1.16122e-14	UP
AT5G43580	UPI	Predicted to encode a PR (pathogenesis-related) peptide that belongs to the PR-6 proteinase inhibitor family. Six putative PR-6-type protein encoding genes are found in Arabidopsis: At2g38900, At2g38870, At5g43570, At5g43580, At3g50020 and At3g46860.	9.41061	1.78145e-14	UP
AT3G21305	NA	NA	9.13155	5.35028e-14	UP
AT3G21500	DXL1	Encodes a protein postulated to have 1-deoxy-D-xylulose 5-phosphate synthase activity.	8.86986	5.12366e-25	UP
AT1G69880	ATH8	NA	8.64842	2.02562e-23	UP
AT4G11650	ATOSM34	osmotin-like protein	8.53831	2.00996e-12	UP
AT1G13310	NA	NA	8.45161	5.45158e-23	UP
AT2G21900	NA	NA	8.25242	9.83731e-12	UP
AT2G45570	CYP76C2	member of CYP76C	8.20315	1.22324e-94	UP
AT4G14010	RALFL32	Member of a diversely expressed predicted peptide family showing sequence similarity to tobacco Rapid Alkalinization Factor (RALF), and is believed to play an essential role in the physiology of Arabidopsis. Consists of a single exon and is characterized by a conserved C-terminal motif and N-terminal signal peptide.	8.19159	3.00011e-10	UP
AT5G05340	PRX52	NA	8.18463	8.30559e-292	UP
AT4G28040	UMAMIT33	NA	8.1365	7.70883e-11	UP
AT3G60140	BGLU30	Encodes a protein similar to beta-glucosidase and is a member of glycoside hydrolase family 1. Expression is induced after 24 hours of dark treatment, in senescing leaves and treatment with exogenous photosynthesis inhibitor. Induction of gene expression was suppressed in excised leaves supplied with sugar. The authors suggest that the gene's expression pattern is responding to the level of sugar…	8.10671	2.27474e-11	UP
AT2G46670	NA	NA	8.03817	2.40251e-10	UP
AT3G51360	NA	NA	8.02895	2.33775e-10	UP
AT3G61930	NA	NA	7.98895	9.89549e-11	UP
AT2G02580	CYP71B9	member of CYP71B	7.98729	1.61899e-10	UP
AT1G80590	ATWRKY66	member of WRKY Transcription Factor; Group III	7.9561	3.96551e-10	UP
AT4G18360	GOX3	NA	7.72826	1.94038e-13	UP
AT3G01420	ALPHA-DOX1	Encodes an alpha-dioxygenase involved in protection against oxidative stress and cell death. Induced in response to Salicylic acid and oxidative stress. Independent of NPR1 in induction by salicylic acid.	7.68684	4.99548e-42	UP
AT4G23680	NA	NA	7.60105	6.58584e-51	UP
AT3G44540	FAR4	Encodes a member of the eight-member gene family encoding alcohol-forming fatty acyl-CoA reductases (FARs) identified in Arabidopsis thaliana. Three of the FARs, FAR1 (At5g22500), FAR4 (At3g44540) and FAR5 (At3g44550), are shown to generate the fatty alcohols found in root, seed coat, and wound-induced leaf tissue.	7.57922	2.23092e-09	UP
AT3G08860	PYD4	Encodes a protein that is predicted to have beta-alanine aminotransferase activity.	7.56388	1.12449e-48	UP
AT3G57380	NA	NA	7.50772	3.87355e-18	UP
AT3G46230	ATHSP17.4	member of the class I small heat-shock protein (sHSP) family, which accounts for the majority of sHSPs in maturing seeds	7.49322	3.5984e-09	UP
AT1G26400	NA	NA	7.44874	6.7161e-09	UP
AT3G53065	NA	NA	7.44826	5.33689e-09	UP
AT1G66570	ATSUC7	NA	7.44195	2.44923e-17	UP
AT1G80160	GLYI7	NA	7.39088	2.27383e-41	UP
AT2G20030	NA	NA	7.38657	1.04127e-08	UP
AT5G38030	NA	NA	7.37066	1.5143e-08	UP
AT4G24000	ATCSLG2	encodes a protein similar to cellulose synthase	7.36829	5.45478e-112	UP
AT3G09220	LAC7	putative laccase, a member of laccase family of genes (17 members in Arabidopsis).	7.30162	1.13484e-08	UP
AT1G18860	ATWRKY61	member of WRKY Transcription Factor; Group II-b	7.29266	4.59409e-22	UP
AT3G22560	NA	NA	7.20028	2.59378e-08	UP
AT4G11340	NA	NA	7.15527	7.479e-09	UP
AT1G05880	ARI12	NA	7.13375	2.34859e-39	UP
AT5G39520	NA	NA	7.06666	1.30591e-155	UP
AT2G35730	NA	NA	7.03628	2.47759e-08	UP
AT1G02580	EMB173	Encodes a putative transcription factor MEDEA (MEA) that negatively regulates seed development in the absence of fertilization. Mutations in this locus result in embryo lethality. MEA is a Polycomb group gene that is imprinted in the endosperm. The maternal allele is expressed and the paternal allele is silent. MEA is controlled by DEMETER (DME), a DNA glycosylase required to activate MEA express…	7.00106	6.67051e-20	UP
AT5G19890	NA	NA	6.9879	1.63754e-07	UP
AT3G44300	AtNIT2	Encodes an enzyme that catalyzes the hydrolysis of indole-3-acetonitrile (IAN) to indole-3-acetic acid (IAA) (nitrile aminohydrolase, EC 3.5.5.1) and IAN to indole-3-acetamide (IAM) at lower levels. Mutants have reduced sensitivity to IAN and are sensitive to IAA. This enzyme likely participates in other non-auxin-related metabolic pathways.	6.97394	0	UP
AT5G63240	NA	NA	6.96605	1.09658e-07	UP
AT2G31180	ATMYB14	Member of the R2R3 factor gene family.	6.94476	1.24353e-07	UP
AT5G40010	AATP1	NA	6.92889	4.16182e-96	UP
AT5G14180	MPL1	NA	6.90918	7.42652e-23	UP
AT4G22230	NA	NA	6.90146	4.03915e-07	UP
AT5G14130	NA	NA	6.90073	1.90454e-07	UP
AT4G36700	NA	NA	6.85625	2.74129e-07	UP
AT5G50360	AITR5	NA	6.83392	7.28657e-07	UP
AT1G65970	TPX2	thioredoxin-dependent peroxidase 2	6.82824	1.96917e-129	UP
AT2G31945	NA	NA	6.82373	5.75066e-08	UP
AT2G24285	NA	NA	6.80898	3.00163e-07	UP
AT1G66390	ATMYB90	production of anthocyanin pigment 2 protein (PAP2)	6.78508	3.65248e-07	UP
AT2G30660	NA	NA	6.7805	9.86625e-15	UP
AT1G33950	NA	NA	6.76884	7.79106e-67	UP
AT4G19925	NA	NA	6.76252	9.12075e-08	UP
AT3G14225	GLIP4	Contains lipase signature motif and GDSL domain.	6.76033	8.78149e-07	UP
AT3G12502	NA	NA	6.7119	5.77233e-07	UP
AT1G17020	ATSRG1	Encodes a novel member of the Fe(II)/ascorbate oxidase gene family; senescence-related gene.	6.69871	2.96658e-95	UP
AT4G03540	CASPL1C1	NA	6.6725	7.39859e-10	UP
AT1G49900	NA	NA	6.60546	2.25624e-06	UP
AT3G10320	MUCI21	NA	6.59147	3.54999e-98	UP
AT5G53990	NA	NA	6.57897	1.22774e-06	UP
AT1G73220	AtOCT1	NA	6.49361	2.79001e-06	UP
AT5G24205	NA	NA	6.49322	2.78874e-06	UP
AT1G66280	BGLU22	NA	6.46211	9.12532e-06	UP
AT1G03790	AtTZF4	Encodes SOMNUS (SOM), a nucleus-localized CCCH-type zinc finger protein. SOM negatively regulates light-dependent seed germination downstream of PIL5 (AT2G20180).	6.43366	4.71909e-06	UP
AT2G14620	XTH10	NA	6.41536	1.45925e-203	UP
AT3G04320	NA	NA	6.40284	3.98815e-06	UP
AT5G48000	CYP708	Encodes a member of the CYP708A family of cytochrome P450 enzymes. THAH appears to add a hydroxyl group to the triterpene thalianol. thah1 mutants have an elevated accumulation of thalianol. thah1-1 mutants have longer roots than wild type plants. Thalian-diol and desaturated thalian-diol are lost from the root extracts of thah1-1 mutants. Overexpression of the sequence from At5g48000.1 rescues t…	6.37006	6.58379e-06	UP
AT2G27389	NA	NA	6.35196	9.54052e-16	UP
AT5G01300	NA	NA	6.3428	7.2434e-07	UP
AT5G21150	AGO9	AGO9-dependent sRNA silencing is crucial to specify cell fate in the Arabidopsis ovule. AGO9 is expressed in reproductive companion cells but not in the associated male or female gametes or their precursors. Therefore, AGO9 acts non-cell autonomously to silencing the activity of TEs activity in the female gametophyte.	6.33766	4.38635e-06	UP
AT2G26400	ARD	Encodes a protein predicted to belong to the acireductone dioxygenase (ARD/ARD)family.	6.33128	5.93184e-44	UP
AT3G46680	NA	NA	6.30528	6.87113e-06	UP
AT4G33020	ATZIP9	member of Fe(II) transporter isolog family	6.30457	5.13829e-06	UP
AT2G47950	NA	NA	6.2974	1.13195e-08	UP
AT1G61080	NA	NA	6.27661	3.19517e-44	UP
AT5G15500	NA	NA	6.24033	2.63392e-15	UP
AT2G34610	NA	NA	6.21722	3.59565e-12	UP
AT4G05030	NA	NA	6.20113	4.8541e-15	UP
AT1G61810	BGLU45	NA	6.20068	2.82207e-29	UP
AT4G10860	NA	NA	6.19382	2.82404e-33	UP
AT5G46960	AtPMEI12	NA	6.16963	3.13109e-42	UP
AT1G67148	NA	NA	6.16491	1.80189e-06	UP
AT1G80580	NA	encodes a member of the ERF (ethylene response factor) subfamily B-1 of ERF/AP2 transcription factor family. The protein contains one AP2 domain. There are 15 members in this subfamily including ATERF-3, ATERF-4, ATERF-7, and leafy petiole.	6.16442	1.24274e-05	UP
AT2G29470	ATGSTU3	Encodes glutathione transferase belonging to the tau class of GSTs. Naming convention according to Wagner et al. (2002).	6.15891	1.17841e-16	UP
AT5G41280	NA	NA	6.14572	2.30743e-06	UP
AT3G60420	NA	NA	6.12666	1.29976e-05	UP
AT3G02240	GLV4	Encodes a root meristem growth factor (RGF). Belongs to a family of functionally redundant homologous peptides that are secreted, tyrosine-sulfated, and expressed mainly in the stem cell area and the innermost layer of central columella cells. RGFs are required for maintenance of the root stem cell niche and transit amplifying cell proliferation. Members of this family include: At5g60810 (RGF1), …	6.10709	2.93736e-06	UP
AT1G60740	NA	NA	6.08803	1.83882e-05	UP
AT4G36610	NA	NA	6.08782	1.68659e-05	UP
AT5G07650	NA	NA	6.07025	8.13185e-29	UP
AT5G24910	CYP714A1	member of CYP714A	6.06544	4.22481e-44	UP
AT4G36052	NA	NA	6.04929	7.17582e-05	UP
AT1G68150	ATWRKY9	member of WRKY Transcription Factor; Group II-b	6.0484	3.50646e-05	UP
AT2G05510	NA	NA	6.04564	3.64984e-06	UP
AT4G12500	NA	NA	6.02027	3.41413e-33	UP
AT3G49130	NA	NA	6.00989	7.5732e-08	UP
AT4G10510	NA	NA	6.00962	0.000112569	UP
AT3G50400	NA	NA	6.00755	4.47585e-05	UP
AT3G59850	NA	NA	6.00738	2.73352e-05	UP
AT2G03850	NA	NA	6.00424	3.95692e-06	UP
AT1G33960	AIG1	Identified as a gene that is induced by avirulence gene avrRpt2 and RPS2 after infection with Pseudomonas syringae pv maculicola strain ES4326 carrying avrRpt2	5.9904	1.0926e-50	UP
AT5G50760	SAUR55	NA	5.96878	1.66163e-30	UP
AT4G12490	AZI3	NA	5.9572	1.21128e-74	UP
AT2G45220	AtPME17	NA	5.94157	1.70199e-33	UP
AT1G10220	NA	NA	5.93915	5.48023e-06	UP
AT5G23990	ATFRO5	Encodes a ferric chelate reductase that is expressed at low levels in roots,shoots and flowers, but not cotyledons.	5.92345	5.0159e-05	UP
AT1G10586	NA	NA	5.923	5.08033e-05	UP
AT1G04427	NA	NA	5.92281	5.36454e-05	UP
AT2G31420	NA	NA	5.92243	7.07395e-05	UP
AT3G14060	NA	NA	5.91107	2.51203e-60	UP
AT2G20825	ULT2	NA	5.8793	6.63616e-05	UP
AT1G67635	NA	NA	5.87924	9.21815e-05	UP
AT5G63225	NA	NA	5.86496	6.92619e-56	UP
AT2G15340	NA	NA	5.83348	7.42532e-05	UP
AT1G30990	NA	NA	5.83299	5.9775e-05	UP
AT4G33610	NA	NA	5.83297	8.28162e-05	UP
AT1G03660	NA	NA	5.81732	2.40621e-21	UP
AT5G44570	CWM2	NA	5.80963	3.71211e-89	UP
AT3G03670	NA	NA	5.79971	1.29405e-05	UP
AT3G13610	F6'H1	NA	5.76956	1.22825e-34	UP
AT3G20110	CYP705A20	member of CYP705A	5.73692	0.000113037	UP
AT4G12480	EARLI1	a putative lipid transfer protein, vernalization-responsive and cold-induced	5.73674	7.96822e-214	UP
AT5G65130	WIND4	encodes a member of the DREB subfamily A-6 of ERF/AP2 transcription factor family. The protein contains one AP2 domain. There are 8 members in this subfamily including RAP2.4.	5.69756	2.13646e-05	UP
AT4G06935	NA	NA	5.68656	0.000313204	UP
AT4G12495	NA	NA	5.65532	7.62208e-55	UP
AT5G15130	ATWRKY72	member of WRKY Transcription Factor; Group II-b; contribute to basal immunity.	5.65509	4.12295e-17	UP
AT3G19615	NA	NA	5.65128	1.23412e-06	UP
AT2G39518	CASPL4D2	NA	5.64561	1.34115e-130	UP
AT3G25490	NA	NA	5.64495	2.58279e-05	UP
AT1G15380	GLYI4	NA	5.64448	2.5172e-05	UP
AT2G16760	NA	NA	5.63408	0.000182398	UP
AT5G13170	AtSWEET15	NA	5.62534	1.67542e-09	UP
AT1G65483	NA	NA	5.62038	5.06905e-71	UP
AT1G03050	PICALM5A	NA	5.61746	2.86135e-05	UP
AT5G53820	NA	NA	5.59986	8.09096e-15	UP
AT2G04805	NA	NA	5.59172	1.24585e-06	UP
AT2G25090	AtCIPK16	Encodes a member of the SNF1-related kinase (SnRK) gene family (SnRK3.18), which has also been reported as a member of the CBL-interacting protein kinases (CIPK16).	5.59071	2.18193e-12	UP
AT5G06665	NA	NA	5.57942	0.000243383	UP
AT5G50590	NA	NA	5.56057	3.91296e-05	UP
AT5G50690	NA	NA	5.56057	3.91296e-05	UP
AT1G30100	ATNCED5	Encodes 9-cis-epoxycarotenoid dioxygenase, a key enzyme in the biosynthesis of abscisic acid. The expression of this gene increases during the first 6h of imbibition.	5.55194	7.46586e-73	UP
AT2G39530	CASPL4D1	NA	5.54609	9.14225e-63	UP
AT3G46280	NA	NA	5.52368	2.65395e-126	UP
AT2G42060	NA	NA	5.49819	3.23998e-06	UP
AT4G37150	ATMES9	Encodes a protein shown to have carboxylesterase activity, methyl salicylate esterase activity, methyl jasmonate esterase activity, and methyl IAA esterase activity in vitro. MES9 appears to be involved in MeSA hydrolysis in planta. Expression of MES9 can restore systemic acquired resistance in SAR-deficient tobacco plants. This protein does not act on MeGA4, or MEGA9 in vitro.	5.48083	1.44824e-120	UP
AT4G10720	NA	NA	5.47995	1.35279e-06	UP
AT2G03360	NA	NA	5.46917	4.35865e-09	UP
AT1G01453	NA	NA	5.4644	0.000478007	UP
AT1G76430	PHT1;9	Encodes Pht1;9, a member of the Pht1 family of phosphate transporters which include: Pht1;1/At5g43350, Pht1;2/At5g43370, Pht1;3/At5g43360, Pht1;4/At2g38940, Pht1;5/At2g32830, Pht1;6/At5g43340, Pht1;7/At3g54700, Pht1;8/At1g20860, Pht1;9/At1g76430 (Plant Journal 2002, 31:341).	5.46398	0.00141304	UP
AT2G01379	NA	NA	5.46321	0.000370419	UP
AT5G13900	NA	NA	5.46224	0.000581748	UP
AT3G04070	ANAC047	NA	5.45826	2.32988e-121	UP
AT4G28940	NA	NA	5.45825	5.75651e-09	UP
AT2G37750	NA	NA	5.45673	2.94845e-40	UP
AT2G44010	NA	NA	5.44769	7.04433e-09	UP
AT1G57570	NA	NA	5.44708	4.60554e-09	UP
AT2G21780	NA	NA	5.44024	7.32023e-05	UP
AT1G69480	NA	NA	5.43873	4.55868e-07	UP
AT5G24206	NA	NA	5.41313	1.00997e-08	UP
AT3G07255	NA	NA	5.40309	0.000754029	UP
AT2G41690	AT-HSFB3	member of Heat Stress Transcription Factor (Hsf) family	5.40276	0.000531953	UP
AT1G54540	NHL11	NA	5.40222	0.000467711	UP
AT3G46520	ACT12	Member of actin subclass composed of ACT12 and ACT4. RNA is expressed at very low levels in vegetative organs, low levels in flowers and very high levels in pollen. Expression of an ACT12/GUS fusion was found in vascular tissues, tapetum, developing and mature pollen, the root cap and in a ring of pericycle tissues during lateral root initiation and early development.	5.39919	2.76979e-13	UP
AT3G53480	ABCG37	Negative regulator of auxin polar transport inhibitors. ABCG37 regulates auxin distribution and homeostasis in roots by excluding IBA from the root apex, but does not act directly in basipetal transport. ABCG37 and ABCG36 act redundantly at outermost root plasma membranes and, transport IBA out of the cells.	5.3852	1.51115e-13	UP
AT1G19250	FMO1	FMO1 is required for full expression of TIR-NB-LRRconditioned resistance to avirulent pathogens and for basal resistance to invasive virulent pathogens. Functions in an EDS1-regulated but SA-independent mechanism that promotes resistance and cell death at pathogen infection sites.	5.37816	1.44268e-38	UP
AT5G48410	ATGLR1.3	member of Putative ligand-gated ion channel subunit family	5.36436	2.86359e-93	UP
AT5G02580	NA	NA	5.34356	0.000184801	UP
AT1G36640	NA	NA	5.34326	9.19165e-05	UP
AT1G78710	TBL42	Encodes a member of the TBL (TRICHOME BIREFRINGENCE-LIKE) gene family containing a plant-specific DUF231 (domain of unknown function) domain. TBL gene family has 46 members, two of which (TBR/AT5G06700 and TBL3/AT5G01360) have been shown to be involved in the synthesis and deposition of secondary wall cellulose, presumably by influencing the esterification state of pectic polymers. A nomenclature…	5.339	0.000805617	UP
AT1G73270	scpl6	NA	5.33877	0.00101115	UP
AT1G33940	NA	NA	5.33771	0.000807047	UP
AT5G50300	ATAZG2	Encodes a homolog of the adenine-guanine-hypoxanthine transporter AzgA of Aspergillus nidulans. Function as a plant adenine-guanine transporter. Two closely related genes exist in Arabidopsis: AT3G10960 (Azg1) and AT5G50300 (Azg2).	5.33724	0.000931328	UP
AT3G61390	NA	NA	5.3143	1.3448e-32	UP
AT1G65610	ATGH9A2	NA	5.31067	2.51515e-27	UP
AT4G11655	NA	NA	5.31059	3.63735e-55	UP
AT5G24200	NA	NA	5.29721	1.6221e-224	UP
AT3G13130	NA	NA	5.28434	1.40877e-38	UP
AT1G19230	AtRbohE	NA	5.27282	3.36426e-24	UP
AT1G55775	NA	NA	5.27262	6.35268e-58	UP
AT3G48920	AtMYB45	Member of the R2R3 factor gene family.	5.27124	0.00120048	UP
AT2G31690	DALL5	encodes a triacylglycerol lipase located in plastoglobuli and involved in the degradation of triacylglycerol. It also has impact on leaf senescence and maintaining the structural integrity of thylakoids.	5.27075	0.00107462	UP
AT5G43350	NA	NA	5.27075	0.00107462	UP
AT2G34500	CYP710A1	Encodes a protein with C22-sterol desaturase activity. The enzyme was shown to catalyze in the presence of NADPH the conversion of &beta;-sitosterol to stigmasterol, but not that of 24-<i>epi</i>-campesterol to brassicasterol (unlike CYP710A2).	5.27075	1.18385e-19	UP
AT5G09520	PELPK2	NA	5.26991	0.00102843	UP
AT3G57950	NA	NA	5.26086	6.07944e-50	UP
AT4G37990	ATCAD8	Encodes an aromatic alcohol:NADP+ oxidoreductase whose mRNA levels are increased in response to treatment with a variety of phytopathogenic bacteria. Though similar to mannitol dehydrogenases, this enzyme does not have mannitol dehydrogenase activity.	5.25623	9.2738e-29	UP
AT1G05680	UGT74E2	Encodes a UDP-glucosyltransferase, UGT74E2, that acts on IBA (indole-3-butyric acid) and affects auxin homeostasis. The transcript and protein levels of this enzyme are strongly induced by H2O2 and may allow integration of ROS (reactive oxygen species) and auxin signaling. This enzyme can also transfer glycosyl groups to several compounds related to the explosive TNT when this synthetic compound …	5.24917	4.54758e-52	UP
AT3G55970	ATJRG21	NA	5.24405	5.16548e-279	UP
AT2G44450	BGLU15	NA	5.23844	0.000151149	UP
AT4G13660	ATPRR2	Encodes a pinoresinol reductase involved in lignan biosynthesis. Expressed strongly in roots and less strongly in stems. Shows preference for pinoresinol and not lariciresinol.	5.23828	9.98363e-31	UP
AT5G07010	ATST2A	Encodes a sulfotransferase that acts specifically on 11- and 12-hydroxyjasmonic acid. Transcript levels for this enzyme are increased by treatments with jasmonic acid (JA), 12-hydroxyJA, JA-isoleucine, and 12-oxyphytodienoic acid (a JA precursor).	5.23195	1.21522e-37	UP
AT2G05910	NA	NA	5.23031	7.30632e-06	UP
AT1G29090	NA	NA	5.21765	3.39759e-08	UP
AT2G48130	LTPG15	NA	5.20175	0.00162351	UP
AT1G76480	NA	NA	5.20096	0.00132958	UP
AT5G38910	NA	NA	5.20008	0.0012546	UP
AT5G24316	NA	NA	5.19977	0.00133191	UP
AT5G48400	ATGLR1.2	member of Putative ligand-gated ion channel subunit family	5.18456	7.51808e-161	UP
AT3G45410	LecRK-I.3	encodes a receptor-like kinase that has serine/threonine kinase activity whose expression is induced by high salt stress. This induction is inhibited by tobacco ethylene receptor.	5.17521	4.66876e-56	UP
AT2G43510	ATTI1	Member of the defensin-like (DEFL) family. Encodes putative trypsin inhibitor protein which may function in defense against herbivory.	5.162	3.5186e-207	UP
AT2G37770	AKR4C9	NA	5.13858	1.09027e-23	UP
AT2G30670	NA	NA	5.12739	0.0026275	UP
AT5G14160	NA	NA	5.12616	0.00201249	UP
AT1G33730	NA	NA	5.12612	4.74475e-54	UP
AT1G17744	NA	NA	5.10817	9.57077e-11	UP
AT2G46680	ATHB-7	encodes a putative transcription factor that contains a homeodomain closely linked to a leucine zipper motif. Transcript is detected in all tissues examined. Is transcriptionally regulated in an ABA-dependent manner and may act in a signal transduction pathway which mediates a drought response.	5.09629	3.27933e-199	UP
AT4G23700	ATCHX17	member of Putative Na+/H+ antiporter family	5.09265	4.63603e-141	UP
AT3G17150	NA	NA	5.08737	0.000414115	UP
AT3G02885	GASA5	NA	5.07307	1.93697e-12	UP
AT3G46080	NA	NA	5.063	2.29772e-206	UP
AT3G28510	NA	NA	5.06276	4.49634e-27	UP
AT3G09270	ATGSTU8	Encodes glutathione transferase belonging to the tau class of GSTs. Naming convention according to Wagner et al. (2002).	5.06217	8.99861e-30	UP
AT1G17615	NA	NA	5.0521	8.68406e-39	UP
AT2G07692	NA	NA	5.04868	0.00257196	UP
AT1G66860	NA	NA	5.04854	0.00243095	UP
AT1G55365	NA	NA	5.04797	0.00324737	UP
AT3G11480	ATBSMT1	The gene encodes a SABATH methyltransferase that methylates both salicylic acid and benzoic acid. It is highly expressed in flowers, induced by biotic and abiotic stress and thought to be involved in direct defense mechanism.	5.04017	8.69517e-16	UP
AT5G59220	HAI1	NA	5.02843	4.89538e-166	UP
AT3G18250	NA	NA	5.02371	2.21833e-49	UP
AT1G14080	ATFUT6	member of Xyloglucan fucosyltransferase family	5.01489	7.03921e-27	UP
AT2G29950	EFL1	NA	4.99698	0.00671635	UP
AT3G47040	NA	NA	4.98312	1.07461e-19	UP
AT1G30700	AtBBE8	NA	4.98008	1.50725e-96	UP
AT1G30220	ATINT2	Inositol transporter presenting conserved extracellular loop domains homologs of plexins/semaphorin/integrin (PSI) domains from animal type I receptors.	4.97525	3.63248e-50	UP
AT5G10625	NA	NA	4.97027	3.03245e-42	UP
AT1G69930	ATGSTU11	Encodes glutathione transferase belonging to the tau class of GSTs. Naming convention according to Wagner et al. (2002).	4.9665	3.04316e-128	UP
AT1G26240	NA	NA	4.96637	0.00267439	UP
AT5G15480	NA	NA	4.96574	0.00278667	UP
AT1G74550	CYP98A9	member of CYP98A	4.9653	0.00405788	UP
AT3G50030	NA	NA	4.9653	0.00405788	UP
AT5G43570	NA	NA	4.96503	0.00324098	UP
AT1G08853	NA	NA	4.96485	0.0138796	UP
AT5G48430	NA	NA	4.96464	0.0037962	UP
AT3G22910	ACA13	NA	4.93435	8.29807e-274	UP
AT5G17330	AtGAD1	Encodes one of two isoforms of glutamate decarboxylase.	4.92782	2.7981e-160	UP
AT2G08060	NA	NA	4.9268	5.53948e-07	UP
AT4G37390	NA	NA	4.90761	4.64708e-134	UP
AT5G18270	ANAC087	NA	4.90717	1.15259e-72	UP
AT1G62580	NA	NA	4.87879	4.86751e-07	UP
AT1G16225	NA	NA	4.87871	0.00412917	UP
AT5G57510	NA	NA	4.8787	3.32816e-38	UP
AT5G65510	AIL7	NA	4.8784	0.00505279	UP
AT2G06185	NA	NA	4.87826	7.69974e-07	UP
AT1G68380	NA	NA	4.87792	0.00514282	UP
AT3G04475	NA	NA	4.87741	0.00514726	UP
AT1G32960	ATSBT3.3	NA	4.86591	2.55056e-28	UP
AT1G04580	AAO4	Encodes aldehyde oxidase AAO4 preferentially expressed in developing seeds.	4.86543	2.77969e-13	UP
AT1G32350	AOX1D	NA	4.86392	4.57084e-22	UP
AT1G15520	ABCG40	ABC transporter family involved in ABA transport and resistance to lead. Localizes to plasma membrane. Upregulated by lead. Expressed in leaves, flowers, stomata and roots.	4.85318	7.06746e-23	UP
AT3G22620	NA	NA	4.85164	2.56433e-18	UP
AT3G21080	NA	NA	4.82694	2.1457e-94	UP
AT1G48325	NA	NA	4.82427	0.000927104	UP
AT5G41610	ATCHX18	member of Putative Na+/H+ antiporter family	4.82327	6.50921e-94	UP
AT2G17740	VLG	NA	4.81957	4.64985e-78	UP
AT5G46950	NA	NA	4.78674	0.00685094	UP
AT1G17180	ATGSTU25	Encodes glutathione transferase belonging to the tau class of GSTs. Naming convention according to Wagner et al. (2002).	4.78658	0.00661131	UP
AT3G49540	NA	NA	4.78592	0.0168602	UP
AT2G41800	TEB	NA	4.78591	3.33597e-66	UP
AT1G15610	NA	NA	4.78542	0.00607399	UP
AT1G53620	NA	NA	4.7833	1.62596e-11	UP
AT3G02480	ABR	NA	4.76153	0.0046047	UP
AT1G69920	NA	NA	4.75502	1.01816e-14	UP
AT5G11290	NA	NA	4.74861	6.46437e-05	UP
AT3G48580	XTH11	NA	4.72098	3.88422e-20	UP
AT3G22240	AthCYSTM9	NA	4.70753	3.19511e-20	UP
AT3G44550	FAR5	Encodes a member of the eight-member gene family encoding alcohol-forming fatty acyl-CoA reductases (FARs) identified in Arabidopsis thaliana. Three of the FARs, FAR1 (At5g22500), FAR4 (At3g44540) and FAR5 (At3g44550), are shown to generate the fatty alcohols found in root, seed coat, and wound-induced leaf tissue.	4.70499	9.31721e-17	UP
AT2G29480	ATGSTU2	Encodes glutathione transferase belonging to the tau class of GSTs. Naming convention according to Wagner et al. (2002).	4.69942	8.13502e-10	UP
AT4G19970	NA	NA	4.69492	3.88541e-23	UP
AT2G45760	BAL	encodes a protein that is similar to BONZAI1-binding protein BAP1.	4.6891	3.02178e-143	UP
AT2G32460	ABS7	Member of the R2R3 factor gene family.	4.68832	0.0202725	UP
AT1G62940	ACOS5	encodes an acyl-CoA synthetase, has in vitro activity towards medium- to long-chain fatty acids and their hydroxylated derivatives. Expressed in the tapetum. Involved in pollen wall exine formation. Null mutants were devoid of pollen grains at anther maturity and were completely male sterile.	4.68782	0.0160842	UP
AT4G37160	sks15	NA	4.68708	0.00885213	UP
AT2G24740	SDG21	Encodes a SU(VAR)3-9 homolog, a SET domain protein (Homology Subgroup V; Orthology Group 1). Known SET domain proteins are involved in epigenetic control of gene expression. There are 10 SUVH genes in Arabidopsis and members of this subfamily of the SET proteins have an additional conserved SRA domain. This protein is a putative histone methyltransferase (predicted to methylate H3K9/20) related t…	4.68617	0.00691386	UP
AT2G18150	NA	NA	4.68584	0.0078851	UP
AT4G25090	AtRbohG	NA	4.68573	0.00691911	UP
AT5G25180	CYP71B14	putative cytochrome P450	4.68556	0.0074883	UP
AT4G14730	NA	NA	4.68486	0.00943348	UP
AT4G26930	AtMYB97	Encodes a putative transcription factor (MYB97).	4.68462	0.0116895	UP
AT1G55560	sks14	NA	4.68438	0.0256998	UP
AT1G26390	AtBBE4	NA	4.68034	1.8456e-121	UP
AT5G02780	GSTL1	Encodes a member of the lambda family of glutathione transferases. It has thiol transferase activity and self S-glutathionylation activity in vitro.	4.67435	4.58131e-21	UP
AT5G44380	AtBBE28	NA	4.67157	2.69954e-25	UP
AT2G26480	UGT76D1	NA	4.66777	7.56895e-30	UP
AT4G37520	NA	NA	4.66016	0	UP
AT1G30850	RSH4	NA	4.65698	2.43574e-59	UP
AT1G02470	NA	NA	4.64793	6.84426e-69	UP
AT1G69490	ANAC029	Encodes a member of the NAC transcription factor gene family. It is expressed in floral primordia and upregulated by AP3 and PI. Its expression is associated with leaf senescence.	4.636	2.63336e-30	UP
AT3G11340	UGT76B1	NA	4.62431	1.7559e-18	UP
AT3G61198	NA	NA	4.61972	7.71999e-69	UP
AT3G50460	NA	NA	4.60671	0.000194836	UP
AT3G03650	NA	NA	4.60502	5.33779e-06	UP
AT2G26290	ARSK1	NA	4.6014	2.46646e-33	UP
AT4G11170	RMG1	NA	4.59717	4.26259e-117	UP
AT5G13330	Rap2.6L	encodes a member of the ERF (ethylene response factor) subfamily B-4 of ERF/AP2 transcription factor family. The protein contains one AP2 domain. There are 7 members in this subfamily.	4.5878	2.30995e-69	UP
AT1G15385	NA	NA	4.57972	0.0104209	UP
AT1G68850	NA	NA	4.57869	0.0121898	UP
AT3G22920	NA	NA	4.57741	0.0340577	UP
AT2G38340	DREB19	encodes a member of the DREB subfamily A-2 of ERF/AP2 transcription factor family. The protein contains one AP2 domain. There are eight members in this subfamily including DREB2A AND DREB2B that are involved in response to drought.	4.55607	1.12929e-25	UP
AT2G41380	NA	NA	4.55567	3.07676e-137	UP
AT5G20940	NA	NA	4.55176	1.68632e-29	UP
AT1G76470	NA	NA	4.54992	3.10104e-29	UP
AT5G38344	NA	NA	4.54453	7.07663e-06	UP
AT2G35980	ATNHL10	Encodes a protein whose sequence is similar to tobacco hairpin-induced gene (HIN1) and Arabidopsis non-race specific disease resistance gene (NDR1). Expression of this gene is induced by cucumber mosaic virus, spermine and during senescence. The gene product is localized to the chloroplast.	4.52665	1.19533e-15	UP
AT3G01970	ATWRKY45	member of WRKY Transcription Factor; Group I	4.52159	1.88914e-104	UP
AT5G58840	NA	NA	4.51684	6.67211e-44	UP
AT2G45210	SAG201	NA	4.51336	1.02155e-52	UP
AT4G37140	ATMES20	Encodes a protein with similarity to SABP2, a methyl salicylate esterase from tobacco. However, this protein is truncated and lacks two of the residues of the predicted catalytic triad, suggesting that it does not have this enzymatic activity.	4.51289	0.000200785	UP
AT1G68620	NA	NA	4.50658	1.14687e-30	UP
AT4G28420	NA	NA	4.5046	9.74511e-35	UP
AT2G41231	NA	NA	4.50249	0.00311761	UP
AT4G28811	NA	NA	4.46557	0.0247909	UP
AT2G19900	ATNADP-ME1	The malic enzyme (EC 1.1.1.40) encoded by AtNADP-ME1 is expressed in response to developmental and cell-specific signals. The enzyme is active in vitro and appears to function as a homohexamer or homooctamer. It is believed to be a cytosolic protein.	4.46536	0.0403051	UP
AT5G18990	NA	NA	4.46515	0.0406989	UP
AT1G72490	NA	NA	4.46467	0.0220491	UP
AT2G42430	ASL18	LOB-domain protein gene LBD16. This gene contains one auxin-responsive element (AuxRE).	4.46446	0.0172198	UP
AT1G52110	NA	NA	4.46393	0.0160301	UP
AT4G13390	EXT12	NA	4.46373	0.0141298	UP
AT1G06030	FRK2	NA	4.46354	0.0135921	UP
AT4G39675	NA	NA	4.46282	0.0156866	UP
AT3G02215	NA	NA	4.46164	0.0409272	UP
AT5G67310	CYP81G1	member of CYP81G	4.44323	4.67485e-48	UP
AT2G14610	AtCAPE9	PR1 gene expression is induced in response to a variety of pathogens. It is a useful molecular marker for the SAR response. Though the Genbank record for the cDNA associated to this gene is called 'PR-1-like', the sequence actually corresponds to PR1. Expression of this gene is salicylic-acid responsive.	4.44251	5.20717e-34	UP
AT5G59390	NA	NA	4.44035	0.0036872	UP
AT2G22630	AGL17	Encodes a MADs domain containing protein involved in promoting flowering. Loss of function mutations show delayed flowering in long days and reduced levels of LFY and AP1 expression.	4.43999	0.00462649	UP
AT1G72125	AtNPF5.13	NA	4.43976	0.00368982	UP
AT1G17170	ATGSTU24	Encodes glutathione transferase belonging to the tau class of GSTs. Naming convention according to Wagner et al. (2002).	4.42989	8.10286e-59	UP
AT4G26260	MIOX4	Encodes a myo-inositol oxygenase.	4.42982	4.45761e-07	UP
AT5G62150	NA	NA	4.42312	5.07439e-68	UP
AT3G12500	ATHCHIB	encodes a basic chitinase involved in ethylene/jasmonic acid mediated signalling pathway during systemic acquired resistance based on expression analyses.	4.40958	6.07666e-58	UP
AT4G36430	NA	NA	4.39866	2.1237e-44	UP
AT5G52720	NA	NA	4.39544	1.20412e-37	UP
AT1G74140	NA	NA	4.38805	6.94544e-20	UP
AT1G68630	NA	NA	4.38692	6.9791e-12	UP
AT1G08630	THA1	Encodes a threonine aldolase, involved in threonine degradation to glycine. Primarily expressed in seeds and seedlings.	4.38156	8.36921e-13	UP
AT1G22220	NA	NA	4.38007	0.000579273	UP
AT5G01550	LecRK-VI.3	Encodes LecRKA4.2, a member of the lectin receptor kinase subfamily A4 (LecRKA4.1 At5g01540; LecRKA4.2 At5g01550; LecRKA4.3 At5g01560). Together with other members of the subfamily, functions redundantly in the negative regulation of ABA response in seed germination.	4.35623	7.85951e-165	UP
AT1G13480	NA	NA	4.35418	4.22712e-23	UP
AT4G18980	AtS40-3	Encodes a nuclear-targeted protein AtS40-3 that modulates senescence associated gene expression.	4.34325	1.13505e-22	UP
AT1G24320	NA	NA	4.34303	0.000419766	UP
AT1G22420	NA	NA	4.34236	0.000491865	UP
AT2G40370	LAC5	putative laccase, a member of laccase family of genes (17 members in Arabidopsis).	4.34212	0.000525314	UP
AT1G53990	GLIP3	Contains lipase signature motif and GDSL domain.	4.33897	0.0283197	UP
AT5G54040	NA	NA	4.33897	0.0283197	UP
AT5G38940	NA	NA	4.33852	0.0203309	UP
AT5G45095	NA	NA	4.33831	0.0196402	UP
AT2G04190	NA	NA	4.33789	0.0227411	UP
AT1G68450	PDE337	NA	4.33753	0.0215837	UP
AT4G37295	PIPL3	NA	4.33663	0.028429	UP
AT4G39404	NA	NA	4.33643	0.0255405	UP
AT1G23110	NA	NA	4.33581	0.0315933	UP
AT4G03480	NA	NA	4.32391	2.93775e-06	UP
AT4G08770	Prx37	NA	4.32041	1.15042e-72	UP
AT5G45070	AtPP2-A8	NA	4.31061	0.00970975	UP
AT5G50600	ATHSD1	Encodes a hydroxysteroid dehydrogenase HSD1. Two copies of HSD1 (At5g50600 and At5g50700) exist in the Arabidopsis genome as a result of an exact 33-kb duplication on chromosome 5 encompassing seven genes. There are five homologs of HSD1 in Arabidopsis (HSD2-At3g47350, HSD3-At3g47360, HSD4-At5g50590, HSD4-At5g50690 and HSD6-At5g50770; HSD4 has two copies due to the same gene duplication event occ…	4.30815	0.00557533	UP
AT1G74080	ATMYB122	Encodes a putative transcription factor, member of the R2R3 factor gene family (MYB122).	4.30374	3.62929e-48	UP
AT3G17790	ATACP5	NA	4.30372	2.83657e-152	UP
AT3G48850	MPT2	NA	4.30242	2.41127e-80	UP
AT1G51640	ATEXO70G2	A member of EXO70 gene family, putative exocyst subunits, conserved in land plants. Arabidopsis thaliana contains 23 putative EXO70 genes, which can be classified into eight clusters on the phylogenetic tree.	4.30139	0.0110668	UP
AT4G37530	NA	NA	4.30081	2.48729e-122	UP
AT2G47770	ATTSPO	Encodes a membrane-bound protein designated AtTSPO (Arabidopsis thaliana TSPO-related). AtTSPO is related to the bacterial outer membrane tryptophan-rich sensory protein (TspO) and the mammalian mitochondrial 18 kDa Translocator Protein (18 kDa TSPO), members of the TspO/MBR domain-containing membrane proteins. Mainly detected in dry seeds, but can be induced in vegetative tissues by osmotic or s…	4.29569	6.63557e-05	UP
AT4G22680	AtMYB85	Encodes a putative transcription factor (MYB85).	4.28847	4.44324e-18	UP
AT4G22070	ATWRKY31	member of WRKY Transcription Factor; Group II-b	4.28683	3.71629e-60	UP
AT5G24090	ATCHIA	Chitinase A (class III) expressed exclusively under environmental stress conditions.	4.28157	7.47792e-22	UP
AT2G17500	PILS5	NA	4.25043	3.312e-102	UP
AT5G56510	APUM12	Encodes a member of the Arabidopsis Pumilio (APUM) proteins containing PUF domain (eight repeats of approximately 36 amino acids each). PUF proteins regulate both mRNA stability and translation through sequence-specific binding to the 3' UTR of target mRNA transcripts.	4.2438	3.48914e-05	UP
AT2G13810	ALD1	NA	4.24068	6.48709e-38	UP
AT1G66560	NA	NA	4.23858	0.00576443	UP
AT5G11210	ATGLR2.5	member of Putative ligand-gated ion channel subunit family	4.23817	1.57553e-17	UP
AT4G27850	NA	NA	4.23512	6.08884e-24	UP
AT5G09530	PELPK1	NA	4.21982	3.59413e-23	UP
AT1G04500	NA	NA	4.21269	4.32553e-09	UP
AT5G38020	NA	encodes a protein whose sequence is similar to SAM:salicylic acid carboxyl methyltransferase (SAMT) (GI:6002712)(Clarkia breweri) and to SAM:benzoic acid carboxyl methyltransferase (BAMT)(GI:9789277)(Antirrhinum majus)	4.20159	0.035482	UP
AT5G40040	NA	NA	4.20039	0.0297	UP
AT1G02520	ABCB11	NA	4.19993	3.5391e-39	UP
AT3G56970	NA	NA	4.19977	0.0305997	UP
AT3G16450	JAL33	NA	4.19953	0.0306115	UP
AT2G28340	NA	NA	4.19935	0.0370904	UP
AT5G50140	NA	NA	4.19928	0.0356154	UP
AT4G21680	AtNPF7.2	Encodes a nitrate transporter (NRT1.8). Functions in nitrate removal from the xylem sap. Mediates cadmium tolerance.	4.19329	1.9572e-41	UP
AT3G13500	NA	NA	4.19051	0.000189704	UP
AT1G76930	ATEXT1	Encodes an Arabidopsis extensin gene that belongs to cell-wall hydroxyproline-rich glycoproteins. The cross-link of extensins enforces cell wall strength. Transgenic plants overexpressing this gene show an increase in stem thickness.	4.18709	3.87482e-126	UP
AT2G29350	SAG13	senescence-associated gene SAG13 encoding a short-chain alcohol dehydrogenase	4.18503	5.34386e-40	UP
AT1G29640	NA	NA	4.18248	2.59278e-23	UP
AT1G09500	NA	similar to Eucalyptus gunnii alcohol dehydrogenase of unknown physiological function (GI:1143445), Vigna unguiculata (gi:1854445), NOT a cinnamyl-alcohol dehydrogenase	4.17277	4.72554e-101	UP
AT1G55240	NA	NA	4.16542	0.00859592	UP
AT1G71770	PAB5	Encodes a Class I polyA-binding protein. Expressed in floral organs. Binds polyA sepharose in vitro.	4.1641	0.00790335	UP
AT1G65360	AGL23	Encodes AGL23, a Type I MADS-box gene that controls female gametophyte development and the biogenesis of organelles during embryo development.	4.16388	5.6813e-05	UP
AT1G79900	ATMBAC2	encodes a mitochondrial ornithine transporter that exports ornithine from the mitochondria to the cytosol	4.16093	2.53169e-19	UP
AT1G60130	NA	NA	4.15007	0.00106471	UP
AT2G35070	NA	NA	4.14945	1.07966e-54	UP
AT5G25260	flot2	NA	4.13855	2.84415e-15	UP
AT1G18290	NA	NA	4.1316	4.70786e-05	UP
AT2G30770	CYP71A13	putative cytochrome P450	4.12411	2.50453e-24	UP
AT2G39410	MAGL7	NA	4.11668	2.13778e-12	UP
AT4G05540	NA	NA	4.11595	4.12885e-34	UP
AT2G19190	FRK1	Receptor-like protein kinase. Involved in early defense signaling.	4.10953	1.18023e-25	UP
AT2G36020	HVA22J	NA	4.10923	0.00140537	UP
AT5G16235	NA	NA	4.10785	0.000177637	UP
AT4G03985	NA	NA	4.10573	0.012798	UP
AT2G37440	NA	NA	4.09861	3.26007e-21	UP
AT5G06090	NA	NA	4.08744	0.0115399	UP
AT4G21120	AAT1	Encodes a member of the cationic amino acid transporter (CAT) subfamily of amino acid polyamine choline transporters. Mediates efficient uptake of Lys, Arg and Glu in a yeast system.	4.08681	3.67478e-29	UP
AT1G18980	NA	NA	4.08679	0.0283545	UP
AT4G14465	AHL20	NA	4.08569	0.0109882	UP
AT5G06230	TBL9	Encodes a member of the TBL (TRICHOME BIREFRINGENCE-LIKE) gene family containing a plant-specific DUF231 (domain of unknown function) domain. TBL gene family has 46 members, two of which (TBR/AT5G06700 and TBL3/AT5G01360) have been shown to be involved in the synthesis and deposition of secondary wall cellulose, presumably by influencing the esterification state of pectic polymers. A nomenclature…	4.08255	1.42215e-21	UP
AT5G22550	NA	NA	4.07993	1.27148e-07	UP
AT1G70690	HWI1	Encodes a plasmodesmal protein that may be involved in the intercellular movement of molecules through the plasmodesmata. The protein has two DUF26 domains and a single transmembrane domain.	4.06875	2.81412e-94	UP
AT3G48020	NA	NA	4.06593	1.89986e-40	UP
AT5G13320	AtGH3.12	Encodes an enzyme capable of conjugating amino acids to 4-substituted benzoates. 4-HBA (4-hydroxybenzoic acid) and pABA (4-aminobenzoate) may be targets of the enzyme in Arabidopsis, leading to the production of pABA-Glu, 4HBA-Glu, or other related compounds. This enzyme is involved in disease-resistance signaling. It is required for the accumulation of salicylic acid, activation of defense respo…	4.06124	2.69139e-20	UP
AT2G23110	NA	NA	4.05691	4.66715e-22	UP
AT1G53980	NA	NA	4.05635	1.12129e-06	UP
AT1G28180	NA	NA	4.04938	0.0491032	UP
AT1G80470	NA	NA	4.04902	0.0491309	UP
AT2G18190	NA	NA	4.04876	0.042021	UP
AT5G13150	ATEXO70C1	A member of EXO70 gene family, putative exocyst subunits, conserved in land plants. Arabidopsis thaliana contains 23 putative EXO70 genes, which can be classified into eight clusters on the phylogenetic tree.	4.04876	0.042021	UP
AT5G47000	NA	NA	4.0485	0.0401784	UP
AT1G71280	NA	NA	4.04832	0.0481423	UP
AT1G15620	NA	NA	4.04806	0.0420679	UP
AT4G11310	NA	NA	4.04753	0.0482015	UP
AT5G51160	NA	NA	4.04753	0.0482015	UP
AT5G19880	NA	NA	4.04664	2.71789e-25	UP
AT3G24982	ATRLP40	NA	4.04171	1.10631e-08	UP
AT3G03700	NA	NA	4.03892	8.66795e-14	UP
AT3G53230	AtCDC48B	NA	4.03381	2.94198e-124	UP
AT3G22100	NA	NA	4.02119	0.000126037	UP
AT3G48300	CYP71A23	putative cytochrome P450	4.0206	0.000181097	UP
AT4G37010	CEN2	Encodes a member of the Centrin family. Mutants are hypersensitive to UV and prone to UV induced DNA damage. Based on sequence similarity and mutant phenotype CEN2 is thought to be involved in nucelotide excision repair/DNA repair.	4.02	1.86958e-79	UP
AT3G22600	LTPG5	NA	4.01919	1.34042e-17	UP
AT4G11910	NYE2	NA	4.01203	1.82317e-49	UP
AT3G44830	NA	NA	4.00764	7.65266e-09	UP
AT3G09655	NA	NA	4.00527	0.0151077	UP
AT1G35910	AtTPPD	NA	4.00292	2.96099e-22	UP
AT4G12470	AZI1	Encodes AZI1 (AZELAIC ACID INDUCED 1). Involved in the priming of salicylic acid induction and systemic immunity triggered by pathogen or azelaic acid.	4.00204	4.42534e-144	UP
AT2G41250	NA	NA	3.99935	8.83949e-108	UP
AT1G74590	ATGSTU10	Encodes glutathione transferase belonging to the tau class of GSTs. Naming convention according to Wagner et al. (2002).	3.9965	3.17079e-79	UP
AT3G61270	NA	NA	3.98989	0.000184658	UP
AT1G44800	SIAR1	NA	3.98469	4.44014e-170	UP
AT1G02430	ARFD1B	A member of ARF GTPase family. A thaliana has 21 members of this family, known to be essential for vesicle coating and uncoating and functions in GTP-binding. Gene encoding ADP-ribosylation factor and similar to other ARFs and ARF-like proteins.	3.9839	2.79631e-17	UP
AT5G44575	NA	NA	3.97898	2.74766e-86	UP
AT1G70581	NA	NA	3.97561	0.00209749	UP
AT5G56200	NA	NA	3.9752	0.00386992	UP
AT5G39130	NA	NA	3.97329	0.00333838	UP
AT1G65690	NHL6	NA	3.94596	1.29681e-30	UP
AT1G32940	AtSBT3.5	NA	3.94592	5.00735e-138	UP
AT1G19210	ERF017	encodes a member of the DREB subfamily A-5 of ERF/AP2 transcription factor family. The protein contains one AP2 domain. There are 15 members in this subfamily including RAP2.1, RAP2.9 and RAP2.10.	3.94399	1.54619e-12	UP
AT5G44480	DUR	mutant has Altered lateral root; UDP Glucose Epimerase	3.94223	2.89224e-09	UP
AT4G18990	XTH29	NA	3.93133	1.40942e-18	UP
AT5G44574	NA	NA	3.92771	1.21347e-10	UP
AT4G15417	ATRTL1	NA	3.9272	7.49826e-21	UP
AT2G33070	ATNSP2	Encodes a nitrile-specifier protein NSP2. NSP2 is one out of five (At3g16400/NSP1, At2g33070/NSP2, At3g16390/NSP3, At3g16410/NSP4 and At5g48180/NSP5) A. thaliana epithiospecifier protein (ESP) homologues that promote simple nitrile, but not epithionitrile or thiocyanate formation.	3.92679	0.00394739	UP
AT4G06744	NA	NA	3.92673	1.58784e-54	UP
AT3G09680	NA	NA	3.91813	0.019243	UP
AT4G08775	NA	NA	3.91719	0.0149975	UP
AT1G61110	anac025	NA	3.91668	0.0152853	UP
AT2G43580	NA	NA	3.9076	9.19928e-11	UP
AT5G45090	AtPP2-A7	NA	3.90752	1.57733e-35	UP
AT5G38350	NA	NA	3.90633	0.00135949	UP
AT1G52690	LEA7	NA	3.9035	0.000199262	UP
AT1G21320	NA	NA	3.89591	0.000372428	UP
AT1G32950	NA	NA	3.89589	3.01352e-22	UP
AT4G03460	NA	NA	3.89225	3.81581e-12	UP
AT5G64530	ANAC104	NA	3.88731	3.60761e-48	UP
AT4G18430	AtRABA1e	NA	3.88517	1.98938e-11	UP
AT2G28110	FRA8	Homolog to AT5G22940, a member of glycosyltransferase family 47 that is involved in secondary cell wall biosynthesis. It exhibits high sequence similarity to tobacco (Nicotiana plumbaginifolia) pectin glucuronyltransferase. Protein has a domain that shares significant similarity with the pfam03016 domain. It is expressed specifically in developing vessels and fiber cells, and FRA8 is targeted to …	3.88448	9.50068e-14	UP
AT4G11480	NA	NA	3.88448	8.07279e-10	UP
AT4G28790	NA	NA	3.8823	1.27196e-13	UP
AT5G50560	NA	NA	3.86898	3.15279e-11	UP
AT5G50660	NA	NA	3.86898	3.15279e-11	UP
AT1G64070	RLM1	Encodes a TIR-NBS-LRR class of disease resistance protein effective against Leptosphaeria maculans.	3.86251	0.000322696	UP
AT4G35380	BIG4	NA	3.85167	1.03657e-28	UP
AT2G15490	UGT73B4	NA	3.85165	1.20576e-11	UP
AT5G01900	ATWRKY62	member of WRKY Transcription Factor; Group III	3.8516	2.26205e-11	UP
AT1G02220	ANAC003	NA	3.84635	1.35028e-49	UP
AT1G13830	NA	NA	3.84261	1.2419e-35	UP
AT1G48000	AtMYB112	Encodes a putative transcription factor (MYB112).	3.83492	9.98097e-22	UP
AT1G53625	NA	NA	3.83209	8.32468e-66	UP
AT2G42460	NA	NA	3.82455	0.024465	UP
AT5G37250	NA	NA	3.82438	0.0214249	UP
AT1G49960	NA	NA	3.82358	0.0326564	UP
AT5G13080	ATWRKY75	WRKY75 is one of several transcription factors induced during Pi deprivation. It is nuclear localized and regulated differentially during Pi starvation. RNAi mediated suppression of WRKY75 made the plants more susceptible to Pi stress as indicated by the higher accumulation of anthocyanin during Pi starvation.	3.81975	2.65357e-09	UP
AT4G09300	NA	NA	3.81837	4.8936e-10	UP
AT2G45360	NA	NA	3.81093	3.87367e-07	UP
AT5G11920	AtcwINV6	Encodes a protein with fructan exohydrolase (FEH) activity acting on both inulin and levan-type fructans (1- and 6-FEH). The enzyme does not have invertase activity.	3.80653	8.75282e-17	UP
AT1G61820	BGLU46	NA	3.80605	3.08316e-18	UP
AT3G03470	CYP89A9	member of CYP89A	3.80004	5.86083e-159	UP
AT1G01480	ACS2	a member of the 1-aminocyclopropane-1-carboxylate (ACC) synthase (S-adenosyl-L-methionine methylthioadenosine-lyase, EC 4.4.1.14) gene family, isolated from a flower-specific cDNA library.	3.79897	1.75642e-57	UP
AT3G04060	anac046	NA	3.79777	1.04895e-59	UP
AT1G51860	NA	NA	3.78604	1.11323e-19	UP
AT5G49690	NA	NA	3.78159	5.12175e-09	UP
AT1G63245	CLE14	Member of a large family of putative ligands homologous to the Clavata3 gene. Consists of a single exon. Can not replace CLV3 function in vivo.	3.77625	8.26967e-18	UP
AT3G13950	NA	NA	3.76058	5.19653e-20	UP
AT3G62280	NA	NA	3.75918	0.000707272	UP
AT4G40020	NA	NA	3.75794	1.22537e-19	UP
AT2G39030	NATA1	NA	3.75786	3.61711e-115	UP
AT1G71520	NA	encodes a member of the DREB subfamily A-5 of ERF/AP2 transcription factor family. The protein contains one AP2 domain. There are 16 members in this subfamily including RAP2.1, RAP2.9 and RAP2.10.	3.7577	0.00108531	UP
AT5G26660	ATMYB86	a MYB gene encodes a transcriptional repressor of the C4H gene which is involved in the biosynthesis of sinapate esters.	3.75037	7.62477e-19	UP
AT2G25625	CV	NA	3.75026	2.27986e-92	UP
AT2G04450	ATNUDT6	Encodes a protein with NADH pyrophosphatase activity. Although this protein was also shown to have ADP-ribose diphosphatase activity in vitro, mutant analyses suggest that NUDX6 is involved in NADH metabolism in vivo.	3.7501	9.24791e-106	UP
AT2G43620	NA	NA	3.74495	2.90402e-197	UP
AT1G15625	NA	NA	3.74169	2.82361e-10	UP
AT3G22530	NA	NA	3.73701	1.4186e-13	UP
AT5G35920	NA	NA	3.72487	0.0295489	UP
AT1G31250	NA	NA	3.72445	0.0356084	UP
AT5G07310	NA	NA	3.72383	0.0253833	UP
AT5G06839	bZIP65	NA	3.72362	0.0283862	UP
AT4G36820	NA	NA	3.72278	0.0296244	UP
AT2G08650	NA	NA	3.71327	1.31609e-10	UP
AT5G45080	AtPP2-A6	NA	3.70742	2.05711e-14	UP
AT5G26690	HIPP02	NA	3.70137	1.44994e-140	UP
AT1G54575	NA	NA	3.69853	1.16612e-71	UP
AT4G33150	LKR	NA	3.6956	1.5766e-156	UP
AT1G03850	ATGRXS13	NA	3.68769	1.51804e-26	UP
AT1G12940	ATNRT2.5	member of High affinity nitrate transporter family	3.68685	1.60806e-23	UP
AT2G33130	RALF18	Member of a diversely expressed predicted peptide family showing sequence similarity to tobacco Rapid Alkalinization Factor (RALF), and is believed to play an essential role in the physiology of Arabidopsis. Consists of a single exon and is characterized by a conserved C-terminal motif and N-terminal signal peptide.	3.68463	0.000800927	UP
AT5G07985	NA	NA	3.68334	0.00157109	UP
AT1G72540	NA	NA	3.68307	1.3077e-67	UP
AT5G57480	NA	NA	3.68118	1.69944e-92	UP
AT1G26410	NA	NA	3.66652	8.43684e-12	UP
AT2G26820	ATPP2-A3	NA	3.66584	0.0133183	UP
AT2G09640	NA	NA	3.66518	0.0107241	UP
AT1G11080	scpl31	NA	3.66435	0.00732469	UP
AT2G37760	AKR4C8	NA	3.66412	5.62004e-193	UP
AT5G36228	NA	NA	3.66362	0.000158847	UP
AT4G31960	NA	NA	3.66333	0.00787663	UP
AT1G51960	IQD27	NA	3.66319	0.00827384	UP
AT5G65090	BST1	Encodes a protein involved in root hair morphogenesis and tip growth. Required for restricting both the size of the root-hair initiation site and the width of the root hairs during the transition to tip growth, but, apparently, is not required for normal subsequent tip growth.	3.66197	1.56187e-45	UP
AT5G38900	PDI	NA	3.65882	4.62065e-20	UP
AT5G46050	AtNPF5.2	Encodes a di- and tri-peptide transporter involved in responses to wounding, virulent bacterial pathogens, and high NaCl concentrations. The protein is predicted to have 12 transmembrane helicies.	3.65742	1.04012e-77	UP
AT2G44790	UCC2	Encodes a uclacyanin, a protein precursor that is closely related to precursors of stellacyanins and a blue copper protein from pea pods.	3.64771	1.34655e-45	UP
AT1G08173	NA	NA	3.64738	2.1645e-17	UP
AT1G48510	NA	NA	3.64567	0.00181025	UP
AT5G54510	DFL1	Encodes an IAA-amido synthase that conjugates Ala, Asp, Phe, and Trp to auxin. Lines overexpressing this gene accumulate IAA-ASP and are hypersensitive to several auxins. Identified as a dominant mutation that displays shorter hypocotyls in light grown plants when compared to wild type siblings. Protein is similar to auxin inducible gene from pea (GH3).	3.64505	1.69845e-89	UP
AT5G44990	NA	NA	3.64416	2.77921e-51	UP
AT1G65730	YSL7	Arabidopsis thaliana metal-nicotianamine transporter YSL4	3.64	6.06532e-40	UP
AT2G44890	NA	NA	3.63977	3.52377e-07	UP
AT3G47540	NA	NA	3.63492	7.64401e-86	UP
AT5G23950	NA	NA	3.63085	8.2822e-05	UP
AT4G15530	PPDK	The product of this long transcript was shown to be targeted to the chloroplast, whereas the shorter transcript (no targeting sequence) accumulates in the cytosol. They were also found in slightly different tissues.	3.63045	2.51511e-128	UP
AT1G17745	PGDH	encodes a 3-Phosphoglycerate dehydrogenase	3.62913	1.40091e-95	UP
AT1G43910	NA	NA	3.62491	1.77567e-164	UP
AT1G23040	NA	NA	3.62242	3.4861e-103	UP
AT1G13340	ISTL6	NA	3.62233	1.70624e-19	UP
AT5G03545	AT4	Expressed in response to phosphate starvation, this response is enhanced by the presence of IAA.	3.61817	0.043345	UP
AT3G29690	NA	NA	3.61785	0.0360979	UP
AT2G34830	AtWRKY35	member of WRKY Transcription Factor; Group II-e	3.61779	0.0361106	UP
AT1G03106	NA	NA	3.61773	0.0319778	UP
AT1G11810	NA	NA	3.61761	0.032606	UP
AT1G10530	NA	NA	3.61738	0.0345842	UP
AT3G46720	NA	NA	3.61732	0.0350634	UP
AT2G23030	SNRK2-9	encodes a member of SNF1-related protein kinases (SnRK2)	3.61662	0.0350971	UP
AT5G44460	CML43	NA	3.61321	2.33814e-30	UP
AT2G37130	NA	NA	3.61138	1.49603e-60	UP
AT4G35170	CC4	NA	3.61033	3.41557e-21	UP
AT1G13520	NA	NA	3.60998	1.35025e-22	UP
AT1G15040	GAT	NA	3.60712	0.00878919	UP
AT4G28340	NA	NA	3.60703	0.00175106	UP
AT1G02030	NA	NA	3.60677	0.00879212	UP
AT3G21890	BBX31	NA	3.60499	0.000210367	UP
AT2G47200	NA	NA	3.60393	0.000617328	UP
AT5G22860	NA	NA	3.60281	2.93491e-154	UP
AT5G49700	AHL17	NA	3.60171	2.51222e-14	UP
AT3G26470	NA	NA	3.59749	9.49849e-96	UP
AT4G14630	GLP9	germin-like protein with N-terminal signal sequence that may target it to the vacuole, plasma membrane and/or outside the cell.	3.59558	1.08227e-24	UP
AT3G61890	ATHB-12	Encodes a homeodomain leucine zipper class I (HD-Zip I) protein. Loss of function mutant has abnormally shaped leaves and stems.	3.58934	9.09382e-84	UP
AT1G01680	ATPUB54	NA	3.58578	3.44808e-59	UP
AT4G15610	CASPL1D1	NA	3.58019	2.94151e-103	UP
AT3G09960	NA	NA	3.57815	2.38183e-29	UP
AT1G63840	NA	NA	3.57184	7.78909e-112	UP
AT1G61550	NA	NA	3.5679	1.56036e-12	UP
AT2G03770	NA	NA	3.56629	0.00283678	UP
AT1G60830	NA	NA	3.5555	4.44452e-09	UP
AT1G47510	5PTASE11	Encodes a phosphatidylinositol polyphosphate 5-phosphatase. It can dephosphorylate PI(4,5)P2, PI(3,5)P2, and PI(3,4,5)P3, but, it is not active against PI(5)P or the water soluble inositol(1,4,5)P3 or inositol(1,3,4,5)P4. The transcript levels for this gene rise in response to auxin, ABA, and JA.	3.55443	1.00615e-53	UP
AT2G43570	CHI	NA	3.55115	1.20683e-81	UP
AT1G44130	NA	NA	3.54801	1.57157e-12	UP
AT5G52730	NA	NA	3.54702	5.07665e-11	UP
AT2G07741	NA	NA	3.54447	0.0401007	UP
AT4G28556	RIC7	Encodes RIC7, the downstream effector of active Rop2 GTPase.	3.54431	1.20138e-09	UP
AT1G58340	ABS4	NA	3.54395	1.25064e-40	UP
AT1G26970	NA	NA	3.54338	0.0112763	UP
AT1G63530	NA	NA	3.53982	1.93758e-39	UP
AT2G04100	NA	NA	3.53163	1.73705e-16	UP
AT5G64190	NA	NA	3.52591	6.3224e-11	UP
AT4G32810	ATCCD8	Encodes a protein with similarity to carotenoid cleaving deoxygenases, the enzymes that cleave beta-carotene. Involved in the production of a graft transmissable signal to suppress axillary branching. Protein is localized to chloroplast stroma and expressed primarily in root tip. Mutants in the gene exhibit increased shoot branching, and light-dependent defects in hook opening and hypocotyl/root …	3.52463	0.00181966	UP
AT1G32560	AtLEA4-1	NA	3.524	0.00338283	UP
AT5G17390	NA	NA	3.52284	6.2629e-05	UP
AT1G22480	NA	NA	3.52225	0.00346039	UP
AT3G07365	NA	NA	3.51209	1.50201e-05	UP
AT3G60966	NA	NA	3.5103	8.67562e-50	UP
AT4G30230	NA	NA	3.50943	2.47779e-86	UP
AT2G32660	AtRLP22	NA	3.5061	0.000126742	UP
AT1G10540	ATNAT8	NA	3.50023	1.24438e-05	UP
AT2G30750	CYP71A12	putative cytochrome P450	3.49683	1.06268e-23	UP
AT5G13820	ATBP-1	Encodes a protein that specifically binds plant telomeric DNA repeats. It has a single Myb telomeric DNA-binding domain in C-terminus that prefers the sequence TTTAGGG.	3.49244	1.7129e-82	UP
AT5G13490	AAC2	Encodes mitochondrial ADP/ATP carrier	3.48912	1.92582e-111	UP
AT1G35230	AGP5	Encodes arabinogalactan-protein (AGP5).	3.48611	5.55305e-20	UP
AT1G10585	NA	NA	3.48362	1.56781e-77	UP
AT1G19610	LCR78	Predicted to encode a PR (pathogenesis-related) protein. Belongs to the plant defensin (PDF) family with the following members: At1g75830/PDF1.1, At5g44420/PDF1.2a, At2g26020/PDF1.2b, At5g44430/PDF1.2c, At2g26010/PDF1.3, At1g19610/PDF1.4, At1g55010/PDF1.5, At2g02120/PDF2.1, At2g02100/PDF2.2, At2g02130/PDF2.3, At1g61070/PDF2.4, At5g63660/PDF2.5, At2g02140/PDF2.6, At5g38330/PDF3.1 and At4g30070/PDF…	3.48221	7.51368e-33	UP
AT1G23510	NA	NA	3.48067	0.00193762	UP
AT5G13580	ABCG6	NA	3.47761	0.0203816	UP
AT3G47050	NA	NA	3.47681	4.92102e-38	UP
AT5G36970	NA	NA	3.47646	1.51037e-16	UP
AT5G66690	UGT72E2	UGT72E2 is an UDPG:coniferyl alcohol glucosyltransferase which glucosylates sinapyl- and coniferyl aldehydes as well as sinapyl- and coniferyl alcohol. The enzyme is thought to be involved in lignin metabolism. A knockdown mutant line (72E2KD) was obtained using RNAi silencing. A twofold reduction in coniferyl alcohol 4-<i>O</i>-glucoside and sinapyl alcohol 4-<i>O</i>-glucoside was detected in t…	3.47506	3.64044e-43	UP
AT3G46090	ZAT7	NA	3.47174	1.39907e-11	UP
AT5G46350	ATWRKY8	member of WRKY Transcription Factor; Group II-c	3.47081	4.89043e-59	UP
AT1G24575	NA	NA	3.47019	4.3911e-141	UP
AT3G53150	UGT73D1	NA	3.4654	4.90302e-43	UP
AT3G19270	CYP707A4	Encodes a protein with ABA 8'-hydroxylase activity, involved in ABA catabolism. Member of the CYP707A gene family.	3.45678	2.59349e-23	UP
AT3G49780	ATPSK3	Phytosulfokine 3 precursor, coding for a unique plant peptide growth factor. Plants overexpressing this gene (under a 35S promoter), develop normal cotyledons and hypocotyls but their growth, in particular that of their roots, was faster than that of wildtype.	3.45662	3.90958e-56	UP
AT5G20960	AAO1	Encodes aldehyde oxidase AA01.	3.45085	1.2922e-75	UP
AT2G43000	ANAC042	NA	3.44929	1.24042e-43	UP
AT1G05000	AtPFA-DSP1	NA	3.43829	2.00844e-65	UP
AT4G01430	UMAMIT29	NA	3.43676	8.63527e-47	UP
AT5G59490	NA	NA	3.42877	2.77486e-10	UP
AT5G35580	PBL13	NA	3.4225	3.23617e-18	UP
AT1G50400	NA	NA	3.41729	7.4858e-11	UP
AT1G56650	ATMYB75	Encodes a putative MYB domain containing transcription factor involved in anthocyanin metabolism and radical scavenging. Essential for the sucrose-mediated expression of the dihydroflavonol reductase gene.	3.41696	6.79892e-13	UP
AT2G36690	GAS2	NA	3.41524	2.39102e-39	UP
AT2G34440	AGL29	NA	3.41253	0.0183201	UP
AT3G03480	CHAT	NA	3.40632	1.48892e-29	UP
AT2G04040	ATDTX1	AtDTX1 (At2g04040) has been identified as a detoxifying efflux carrier for plant-derived antibiotics and other toxic compounds, including CD2+.	3.40555	7.59965e-28	UP
AT1G79400	ATCHX2	member of Putative Na+/H+ antiporter family	3.3989	0.000277174	UP
AT5G06720	ATPA2	NA	3.39474	5.63325e-14	UP
AT4G01870	NA	NA	3.39341	3.59017e-78	UP
AT5G09285	NA	NA	3.39084	0.0070017	UP
AT4G01925	NA	NA	3.39032	0.00245831	UP
AT3G46690	NA	NA	3.38855	7.78656e-08	UP
AT4G03320	AtTic20-IV	NA	3.38344	3.36439e-35	UP
AT5G06330	NA	NA	3.37368	8.48214e-45	UP
AT5G56050	NA	NA	3.37359	4.60873e-28	UP
AT1G61800	ATGPT2	glucose6-Phosphate/phosphate transporter 2	3.37078	2.57746e-19	UP
AT1G21740	NA	NA	3.36446	4.18785e-36	UP
AT4G18870	NA	NA	3.36287	3.60531e-10	UP
AT3G27400	PLL18	NA	3.35912	1.50986e-50	UP
AT4G13000	NA	NA	3.35221	1.77544e-16	UP
AT1G72770	AtHAB1	mutant has ABA hypersensitive inhibition of seed germination; Protein Phosphatase 2C; regulates the activation of the Snf1-related kinase OST1 by abscisic acid.	3.35162	8.44488e-176	UP
AT3G01045	NA	NA	3.3453	0.0236212	UP
AT2G38940	ATPT2	Encodes Pht1;4, a member of the Pht1 family of phosphate transporters which include: Pht1;1/At5g43350, Pht1;2/At5g43370, Pht1;3/At5g43360, Pht1;4/At2g38940, Pht1;5/At2g32830, Pht1;6/At5g43340, Pht1;7/At3g54700, Pht1;8/At1g20860, Pht1;9/At1g76430 (Plant Journal 2002, 31:341).	3.34244	6.01665e-60	UP
AT1G21310	ATEXT3	Encodes extensin 3.	3.33369	5.60963e-23	UP
AT1G60730	NA	NA	3.32896	7.57136e-125	UP
AT1G51890	NA	NA	3.32583	4.24034e-18	UP
AT3G13435	NA	NA	3.32293	7.82529e-05	UP
AT4G23210	CRK13	Encodes a Cysteine-rich receptor-like kinase (CRK13). Overexpression of CRK13 leads to hypersensitive response cell death, and induces defense against pathogens by causing increased accumulation of salicylic acid.	3.31793	3.30118e-70	UP
AT1G05100	MAPKKK18	member of MEKK subfamily	3.31466	2.53683e-15	UP
AT1G22400	ATUGT85A1	NA	3.30828	8.36701e-102	UP
AT1G69790	NA	NA	3.30671	2.61422e-34	UP
AT5G56970	ATCKX3	It encodes a protein whose sequence is similar to cytokinin oxidase/dehydrogenase, which catalyzes the degradation of cytokinins.	3.30622	0.00144792	UP
AT5G64890	NA	NA	3.30394	3.85773e-12	UP
AT1G74010	NA	NA	3.30266	1.81031e-52	UP
AT4G11350	NA	NA	3.29952	2.0237e-41	UP
AT1G13530	NA	NA	3.29876	2.90395e-19	UP
AT4G23280	CRK20	Encodes a cysteine-rich receptor-like protein kinase.	3.29777	2.36784e-23	UP
AT1G70440	NA	NA	3.29596	0.00889221	UP
AT1G66700	NA	NA	3.29524	3.30279e-15	UP
AT4G28460	NA	NA	3.28817	8.65529e-17	UP
AT3G55150	ATEXO70H1	A member of EXO70 gene family, putative exocyst subunits, conserved in land plants. Arabidopsis thaliana contains 23 putative EXO70 genes, which can be classified into eight clusters on the phylogenetic tree.	3.28378	9.11138e-09	UP
AT3G26840	PES2	NA	3.28259	1.95271e-84	UP
AT5G03610	NA	NA	3.2768	4.08852e-131	UP
AT5G57785	NA	NA	3.26897	8.30639e-08	UP
AT1G16160	WAKL5	WAK-like kinase	3.26882	0.033145	UP
AT5G47130	NA	NA	3.26643	3.5545e-52	UP
AT5G64810	ATWRKY51	member of WRKY Transcription Factor; Group II-c	3.26196	1.98091e-66	UP
AT3G47780	ABCA7	member of ATH subfamily	3.26136	7.40011e-73	UP
AT4G26200	ACCS7	Member of a family of proteins in Arabidopsis that encode 1-Amino-cyclopropane-1-carboxylate synthase, an enzyme involved in ethylene biosynthesis. Not expressed in response to IAA.	3.25299	1.66174e-09	UP
AT1G53830	ATPME2	encodes a pectin methylesterase	3.24938	1.97127e-25	UP
AT3G28210	PMZ	Encodes a putative zinc finger protein (PMZ).	3.24867	2.90156e-31	UP
AT1G53540	NA	NA	3.24365	0.00531959	UP
AT3G56891	NA	NA	3.24352	0.00922266	UP
AT2G36695	NA	NA	3.24246	0.00533029	UP
AT4G09750	NA	NA	3.23439	4.57096e-113	UP
AT5G25920	NA	NA	3.22944	0.00167706	UP
AT1G06180	ATMYB13	member of MYB3R- and R2R3- type MYB- encoding genes	3.22682	7.99187e-28	UP
AT5G59520	AtZIP2	encodes a metal ion transporter whose expression is regulated by copper.	3.22558	2.12361e-06	UP
AT5G34940	AtGUS3	The protein is predicted (WoLF PSORT program) to be membrane-associated.	3.22325	5.56604e-67	UP
AT5G06760	AtLEA4-5	Encodes LEA4-5, a member of the Late Embryogenesis Abundant (LEA) proteins which typically accumulate in response to low water availability conditions imposed during development or by the environment. Most of thediverse set of LEA proteins can be grouped according to properties such as high hydrophilicity and high content of glycine or other small amino acids in what has been termed hydrophilins.…	3.21952	4.60435e-07	UP
AT1G68200	AtC3H15	NA	3.21067	1.19015e-16	UP
AT5G65500	NA	NA	3.20786	2.67806e-05	UP
AT1G14860	NA	NA	3.20408	2.97643e-08	UP
AT5G38780	NA	NA	3.202	1.59658e-08	UP
AT5G38650	NA	NA	3.19325	1.07792e-157	UP
AT5G03590	NA	NA	3.19047	0.0488802	UP
AT3G47480	CML47	NA	3.18578	1.9079e-81	UP
AT5G19875	NA	NA	3.18568	2.14448e-63	UP
AT2G38240	JAO4	NA	3.18377	1.29538e-17	UP
AT2G23270	NA	NA	3.18226	5.15206e-09	UP
AT1G04490	NA	NA	3.18059	4.68553e-25	UP
AT5G39610	ANAC092	Encodes a NAC-domain transcription factor. Positively regulates aging-induced cell death and senescence in leaves. This gene is upregulated in response to salt stress in wildtype as well as NTHK1 transgenic lines although in the latter case the induction was drastically reduced. It was also upregulated by ABA, ACC and NAA treatment, although in the latter two cases, the induction occurred relativ…	3.17989	6.12226e-82	UP
AT2G30400	ATOFP2	NA	3.17944	3.65156e-09	UP
AT3G14280	NA	NA	3.17571	4.00113e-53	UP
AT2G25000	ATWRKY60	Pathogen-induced transcription factor. Forms protein complexes with itself and with WRKY40. Coexpression with WRKY18 or WRKY40 made plants more susceptible to both P. syringae and B. cinerea. WRKY18, WRKY40, and WRKY60 have partially redundant roles in response to the hemibiotrophic bacterial pathogen Pseudomonas syringae and the necrotrophic fungal pathogen Botrytis cinerea, with WRKY18 playing …	3.17512	2.23961e-94	UP
AT3G17609	HYH	Encodes a homolog of HY5 (HYH). Involved in phyB signaling pathway.	3.17501	4.57312e-44	UP
AT4G37430	CYP81F1	Encodes a member of the CYP81F cytochrome P450 monooxygenase subfamily.	3.16707	1.56934e-65	UP
AT3G10815	NA	NA	3.16682	2.03993e-20	UP
AT3G50770	CML41	NA	3.16065	2.48378e-11	UP
AT1G79450	ALIS5	NA	3.15405	4.54026e-12	UP
AT4G31970	NA	NA	3.15065	0.000145148	UP
AT2G04430	atnudt5	NA	3.14842	1.86913e-59	UP
AT1G77380	AAP3	Amino acid permease which transports basic amino acids.	3.14493	7.75516e-38	UP
AT5G44572	NA	NA	3.14414	4.19146e-42	UP
AT2G38250	NA	NA	3.14274	6.51853e-63	UP
AT1G01060	LHY	LHY encodes a myb-related putative transcription factor involved in circadian rhythm along with another myb transcription factor CCA1	3.14166	2.20221e-18	UP
AT3G49120	ATPCB	Class III peroxidase Perx34. Expressed in roots, leaves and stems. Located in the cell wall. Involved in cell elongation. Expression activated by light. May play a role in generating H2O2 during defense response.	3.1374	9.45693e-128	UP
AT4G37770	ACS8	Encodes an auxin inducible ACC synthase.	3.13707	1.03827e-51	UP
AT5G01375	NA	NA	3.13482	0.0188426	UP
AT1G02460	NA	NA	3.1348	1.70367e-43	UP
AT3G19390	NA	NA	3.13476	0.013107	UP
AT5G39050	PMAT1	NA	3.13228	3.20556e-106	UP
AT3G13100	ABCC7	member of MRP subfamily	3.1263	7.99413e-55	UP
AT4G20110	BP80-3;1	NA	3.12617	1.43055e-118	UP
AT4G37710	VQ29	NA	3.12587	0.000629157	UP
AT1G23560	NA	NA	3.12475	0.00089344	UP
AT4G34200	EDA9	NA	3.12383	2.97865e-227	UP
AT3G49580	LSU1	NA	3.12333	1.49281e-21	UP
AT3G61190	BAP1	Encodes a protein with a C2 domain that binds to BON1 in yeast two hybrid analyses. Its ability to bind to phospholipids is enhanced by calcium ions. Involved in maintaining cell homeostasis.	3.12314	2.39169e-09	UP
AT4G19810	ChiC	NA	3.12189	3.88673e-48	UP
AT1G66600	ABO3	A member of WRKY Transcription Factor; Group III. Involved in the regulation of plant responses to ABA and drought stress.	3.12129	1.3743e-13	UP
AT4G15280	NA	NA	3.12	3.21647e-17	UP
AT2G04050	NA	NA	3.11803	1.79474e-08	UP
AT5G22300	AtNIT4	encodes a nitrilase isomer. The purified enzyme shows a strong substrate specificity for beta-cyano-L-alanine, a intermediate product of the cyanide detoxification pathway.	3.11433	5.28192e-151	UP
AT1G78780	NA	NA	3.11305	5.46137e-24	UP
AT1G71140	DTX14	NA	3.11053	4.77916e-99	UP
AT3G61900	SAUR33	NA	3.10808	0.00386277	UP
AT2G02850	ARPN	Encodes plantacyanin one of blue copper proteins. Involved in anther development and pollination. Expressed in the transmitting tract of the pistil.	3.10468	1.33343e-09	UP
AT3G01175	NA	NA	3.10292	1.64163e-08	UP
AT4G08780	NA	NA	3.09645	4.35013e-10	UP
AT1G75000	ELO3	NA	3.0908	1.17929e-108	UP
AT3G45130	LAS1	NA	3.09021	7.96601e-47	UP
AT4G12080	AHL1	NA	3.0899	1.29932e-18	UP
AT4G33420	Prx47	NA	3.08879	4.6846e-34	UP
AT3G63380	ACA12	NA	3.08709	1.24578e-12	UP
AT5G09470	DIC3	Encodes one of the mitochondrial dicarboxylate carriers (DIC): DIC1 (AT2G22500), DIC2 (AT4G24570), DIC3 (AT5G09470).	3.08463	6.44898e-15	UP
AT5G26920	CBP60G	Encodes a calmodulin-binding protein CBP60g (calmodulin binding protein 60-like.g). The calmodulin-binding domain is located near the N-terminus; calmodulin binding is dependent on Ca(2+). Inducible by both bacterial pathogen and MAMP (microbe-associated molecular pattern) treatments. Bacterial growth is enhanced in cbp60g mutants. cbp60g mutants also show defects in salicylic acid (SA) accumulat…	3.08304	2.66283e-16	UP
AT1G53900	NA	NA	3.07954	2.09656e-07	UP
AT1G25460	NA	NA	3.07894	0.000254055	UP
AT3G48640	NA	NA	3.0768	6.72466e-39	UP
AT2G04160	AIR3	isolated from differential screening of a cDNA library from auxin-treated root culture. encodes a protein similar to subtilisin-like serine protease which is believed to be active outside the plant cell.	3.07458	2.18983e-144	UP
AT5G46130	NA	NA	3.07029	1.15154e-11	UP
AT1G57560	AtMYB50	Member of the R2R3 factor gene family.	3.06669	3.34835e-27	UP
AT3G29250	AtSDR4	NA	3.06618	6.00869e-10	UP
AT2G06065	NA	NA	3.06512	0.00532648	UP
AT4G39610	NA	NA	3.06032	1.3314e-23	UP
AT1G13540	NA	NA	3.058	6.46895e-16	UP
AT1G09537	NA	NA	3.05552	9.0783e-06	UP
AT1G67070	DIN9	Encodes a protein with phosphomannose isomerase activity that is involved in synthesis of ascorbic acid. Expression is induced after 24 hours of dark treatment, in senescing leaves and treatment with exogenous photosynthesis inhibitor. Induction of gene expression was suppressed in excised leaves supplied with sugar. The authors suggest that the gene's expression pattern is responding to the leve…	3.05435	1.14869e-39	UP
AT3G17420	GPK1	serine/threonine protein kinase-like protein	3.05305	1.61173e-105	UP
AT3G04000	NA	NA	3.05104	8.44026e-43	UP
AT5G61490	NA	NA	3.04927	2.4665e-15	UP
AT5G09290	NA	NA	3.04873	5.60369e-54	UP
AT5G57123	NA	NA	3.04715	5.06063e-14	UP
AT3G60120	BGLU27	NA	3.04016	8.56186e-12	UP
AT1G34060	TAR4	NA	3.03787	3.7747e-19	UP
AT2G34080	NA	NA	3.03348	1.27672e-07	UP
AT4G04972	NA	NA	3.03249	7.00592e-07	UP
AT1G70170	At2-MMP	mutant has Late flowering; Early senescence; Matrix Metalloproteinase	3.03123	2.43754e-20	UP
AT1G67520	NA	NA	3.02828	5.52037e-58	UP
AT5G44567	NA	NA	3.02464	1.05955e-23	UP
AT5G41730	NA	NA	3.02165	1.52737e-07	UP
AT5G26700	NA	NA	3.02154	5.04018e-09	UP
AT4G29570	NA	NA	3.02139	0.00144365	UP
AT3G03165	NA	NA	3.02062	0.00313609	UP
AT2G36080	ABS2	Encodes a plant-specific B3 DNA-binding domain transcription factor. Has transcription repressor activity.	3.01866	4.90362e-81	UP
AT5G39090	NA	NA	3.0152	3.26687e-23	UP
AT3G47420	AtG3Pp1	Encodes a Pi starvation-responsive protein AtPS3.	3.01152	8.06491e-55	UP
AT3G56500	NA	NA	3.00708	2.37369e-05	UP
AT1G31290	AGO3	NA	3.00107	8.34568e-11	UP
AT5G02020	SIS	Encodes a protein involved in salt tolerance, names SIS (Salt Induced Serine rich).	2.9927	8.79398e-39	UP
AT3G51330	NA	NA	2.99191	5.65223e-61	UP
AT5G16080	AtCXE17	NA	2.99064	3.54342e-46	UP
AT4G19975	NA	NA	2.98843	1.22758e-20	UP
AT4G01895	NA	NA	2.97435	1.94643e-20	UP
AT3G15300	MVQ4	NA	2.97402	6.96415e-26	UP
AT2G28500	NA	NA	2.97342	4.95097e-31	UP
AT2G21188	NA	NA	2.96846	2.87596e-08	UP
AT2G38690	NA	NA	2.96786	1.43952e-07	UP
AT2G26410	Iqd4	NA	2.96602	0.00175477	UP
AT5G24210	NA	NA	2.9639	4.61007e-98	UP
AT5G09720	NA	NA	2.9609	0.0215785	UP
AT1G21240	WAK3	encodes a wall-associated kinase	2.95883	1.49466e-12	UP
AT5G17760	NA	NA	2.95258	4.08023e-203	UP
AT1G52890	ANAC019	encodes a NAC transcription factor whose expression is induced by drought, high salt, and abscisic acid. This gene binds to ERD1 promoter in vitro.	2.95186	6.13696e-98	UP
AT1G62420	NA	NA	2.95039	1.50977e-06	UP
AT1G31820	PUT1	NA	2.9471	9.13901e-49	UP
AT2G15780	NA	NA	2.94682	0.00450323	UP
AT2G30550	DALL3	Encodes a lipase that hydrolyzes phosphatidylcholine, glycolipids as well as triacylglycerols.	2.94647	1.54454e-21	UP
AT1G62710	AEP2	Encodes a vacuolar processing enzyme belonging to a novel group of cysteine proteases that is expressed specifically in seeds and is essential for the proper processing of storage proteins.	2.94482	1.0129e-47	UP
AT3G09600	LCL5	NA	2.9431	1.81188e-19	UP
AT5G48540	NA	NA	2.94309	2.13612e-58	UP
AT1G55610	BRL1	mutant has Altered vascular cell differentiation; LRR Receptor Kinase	2.94155	5.46265e-68	UP
AT1G68390	NA	NA	2.93798	1.25546e-29	UP
AT2G32830	PHT1;5	Encodes Pht1;5, a member of the Pht1 family of phosphate transporters which include: Pht1;1/At5g43350, Pht1;2/At5g43370, Pht1;3/At5g43360, Pht1;4/At2g38940, Pht1;5/At2g32830, Pht1;6/At5g43340, Pht1;7/At3g54700, Pht1;8/At1g20860, Pht1;9/At1g76430 (Plant Journal 2002, 31:341).	2.93334	3.41052e-07	UP
AT2G23170	GH3.3	encodes an IAA-amido synthase that conjugates Asp and other amino acids to auxin in vitro.	2.93289	1.15542e-51	UP
AT5G55410	NA	NA	2.92859	0.000915599	UP
AT4G35165	NA	NA	2.92742	0.0482004	UP
AT3G63010	ATGID1B	Encodes a gibberellin (GA) receptor ortholog of the rice GA receptor gene (OsGID1). Has GA-binding activity, showing higher affinity to GA4. Interacts with DELLA proteins in vivo in the presence of GA4.	2.92353	5.47183e-86	UP
AT5G18180	NA	NA	2.91646	6.32799e-05	UP
AT1G15415	NA	The protein encoded by this gene was identified as a part of pollen proteome by mass spec analysis. It has weak homology to LEA (late embryo abundant) proteins. Encodes protein phosphatase 2A (PP2A) B'gamma subunit. Targeted to nucleus and cytosol.	2.91417	0.000683885	UP
AT5G15860	ATPCME	Encodes a protein with prenylcysteine methylesterase activity.	2.91307	1.98729e-135	UP
AT1G09560	GLP5	germin-like protein (GLP5)	2.90698	5.65392e-79	UP
AT3G07600	NA	NA	2.90454	4.15015e-22	UP
AT1G78410	NA	NA	2.90443	9.96642e-15	UP
AT3G49210	WSD6	NA	2.90238	7.72359e-69	UP
AT1G78380	ATGSTU19	Encodes a glutathione transferase that is a member of Tau GST gene family. Expression is induced by drought stress, oxidative stress, and high doses of auxin and cytokinin. naming convention according to Wagner et al. (2002) The expression of this gene is upregulated by herbicide safeners such as benoxacor and fenclorim.	2.89951	2.04293e-246	UP
AT5G01490	ATCAX4	Encodes a cation/proton antiporter, a member of low affinity calcium antiporter CAX2 family. Involved in root development under metal stress.	2.89512	0.0406866	UP
AT3G51540	NA	NA	2.87822	0.000107223	UP
AT4G01540	ANAC068	Encodes a membrane-bound NAC (for NAM, ATAF1/2, CUC2) transcription factor, designated NTM1 (for NAC with transmembrane motif1). NTM1 regulates cell division in Arabidopsis.	2.87801	6.11423e-43	UP
AT1G62370	NA	NA	2.8779	0.0125751	UP
AT2G41342	NA	NA	2.87246	8.94441e-07	UP
AT5G62480	ATGSTU9	Encodes glutathione transferase belonging to the tau class of GSTs. Naming convention according to Wagner et al. (2002).	2.87143	3.87926e-14	UP
AT3G60415	NA	NA	2.87001	3.04453e-124	UP
AT1G19160	NA	NA	2.86822	0.00272303	UP
AT1G72680	ATCAD1	NA	2.86765	1.36245e-243	UP
AT2G23830	PVA31	NA	2.86649	1.17368e-08	UP
AT2G16900	NA	NA	2.86138	2.17869e-94	UP
AT4G19420	PAE8	NA	2.86089	1.23065e-145	UP
AT4G03450	NA	NA	2.85998	8.43057e-79	UP
AT4G08795	NA	NA	2.85944	0.0211308	UP
AT1G61480	NA	NA	2.85344	1.3599e-06	UP
AT2G37870	NA	NA	2.85332	1.55364e-35	UP
AT1G45616	AtRLP6	NA	2.85102	0.000156343	UP
AT5G53870	AtENODL1	NA	2.84819	1.38316e-40	UP
AT1G22440	NA	NA	2.84706	4.46814e-05	UP
AT1G10140	NA	NA	2.84514	2.66181e-50	UP
AT3G07390	AIR12	isolated from differential screening of a cDNA library from auxin-treated root culture. sequence does not show homology to any known proteins and is predicted to be extracellular.	2.84476	2.14651e-113	UP
AT2G41660	MIZ1	Essential for hydrotropism in roots. Mutant roots are defective in hydrotropism, and have slightly reduced phototropism and modified wavy growth response. Has normal gravitropism and root elongation.	2.84377	1.56799e-13	UP
AT5G67600	AthCYSTM13	NA	2.84234	4.07733e-225	UP
AT5G25820	NA	NA	2.83722	1.78935e-54	UP
AT3G62590	PLIP3	NA	2.83583	1.14058e-54	UP
AT4G17215	NA	NA	2.83365	7.12654e-15	UP
AT1G59590	ZCF37	ZCF37 mRNA, complete cds	2.82927	6.15045e-37	UP
AT4G06410	NA	NA	2.82808	0.00522926	UP
AT4G25380	AtSAP10	NA	2.82744	0.00785087	UP
AT3G01600	NA	NA	2.82736	0.0279008	UP
AT5G53970	AtTAT1	encodes tyrosine aminotransferase which is strongly induced upon aging and coronatine treatment	2.82704	2.07108e-80	UP
AT1G73010	AtPPsPase1	NA	2.82074	1.40635e-09	UP
AT2G29100	ATGLR2.9	member of Putative ligand-gated ion channel subunit family	2.81912	5.10312e-05	UP
AT2G34810	AtBBE16	NA	2.81826	3.81887e-71	UP
AT3G28580	NA	NA	2.81411	6.87199e-09	UP
AT5G47560	ATSDAT	Encodes a tonoplast malate/fumarate transporter.	2.81324	2.35731e-243	UP
AT4G36990	NA	NA	2.81197	4.11005e-20	UP
AT1G57630	NA	NA	2.80762	3.2516e-14	UP
AT5G58350	WNK4	Encodes a member of the WNK family (9 members in all) of protein kinases, the structural design of which is clearly distinct from those of other known protein kinases, such as receptor-like kinases and mitogen-activated protein kinases. Its transcription is under the control of circadian rhythms.	2.80638	5.46332e-171	UP
AT1G13970	NA	NA	2.79831	2.1046e-21	UP
AT3G44326	NA	NA	2.79416	9.44676e-09	UP
AT4G04500	CRK37	Encodes a cysteine-rich receptor-like protein kinase.	2.79396	4.09914e-08	UP
AT1G61415	NA	NA	2.79375	0.0240906	UP
AT1G57650	NA	NA	2.78972	1.30999e-22	UP
AT5G23000	NA	NA	2.78738	0.00942537	UP
AT3G13433	NA	NA	2.78522	3.27215e-15	UP
AT5G60630	NA	NA	2.78384	3.27843e-10	UP
AT1G67360	LDAP1	NA	2.77959	2.92003e-55	UP
AT1G68440	NA	NA	2.77666	3.81111e-96	UP
AT4G08555	NA	NA	2.77554	5.68775e-18	UP
AT1G01530	AGL28	NA	2.77538	0.00848558	UP
AT3G60470	NA	NA	2.77482	1.85233e-32	UP
AT2G47190	ATMYB2	Encodes a MYB transcription factor that possesses an R2R3 MYB DNA binding domain and is known to regulate the expression of salt- and dehydration-responsive genes. Has been shown to bind calmodulin.	2.77417	4.31185e-34	UP
AT4G39670	GLTP	NA	2.77263	6.56008e-09	UP
AT5G62180	AtCXE20	NA	2.77202	1.27593e-70	UP
AT2G43820	ATSAGT1	Induced by Salicylic acid, virus, fungus and bacteria.Involved in the tryptophan synthesis pathway. Independent of NPR1 for their induction by salicylic acid. UGT74F1 transfers UDP:glucose to salicylic acid (forming a glucoside (SAG) and a glucose ester (SGE)), benzoic acid, and athranilate in vitro. UGT74F2 shows a weak ability to catalyze the formation of the p-aminobenzoate-glucose ester in vi…	2.77161	5.31644e-84	UP
AT4G18630	NA	NA	2.76948	1.42004e-38	UP
AT1G13550	NA	NA	2.7678	6.01871e-15	UP
AT1G14880	AtPCR1	NA	2.76208	7.59369e-18	UP
AT1G74020	SS2	Encodes AtSS-2 strictosidine synthase.	2.76202	1.20624e-61	UP
AT5G40730	AGP24	Encodes an arabinogalactan-protein (AGP24).	2.75568	3.21587e-19	UP
AT3G15500	ANAC055	Encodes an ATAF-like NAC-domain transcription factor that doesn't contain C-terminal sequences shared by CUC1, CUC2 and NAM. Note: this protein (AtNAC3) is not to be confused with the protein encoded by locus AT3G29035, which, on occasion, has also been referred to as AtNAC3.	2.75567	2.5918e-49	UP
AT5G54165	NA	NA	2.75501	2.00504e-11	UP
AT5G66890	NRG1.3	NA	2.75192	2.61782e-16	UP
AT1G68710	NA	NA	2.74816	2.74154e-166	UP
AT5G17860	CAX7	NA	2.73883	1.85007e-101	UP
AT3G11570	TBL8	Encodes a member of the TBL (TRICHOME BIREFRINGENCE-LIKE) gene family containing a plant-specific DUF231 (domain of unknown function) domain. TBL gene family has 46 members, two of which (TBR/AT5G06700 and TBL3/AT5G01360) have been shown to be involved in the synthesis and deposition of secondary wall cellulose, presumably by influencing the esterification state of pectic polymers. A nomenclature…	2.72832	1.0577e-17	UP
AT2G31570	ATGPX2	glutathione peroxidase GPx	2.72782	4.9999e-184	UP
AT4G37030	NA	NA	2.72733	3.50272e-20	UP
AT4G16690	ATMES16	Encodes a protein shown to have carboxylesterase activity, methyl IAA esterase activity, and methyl jasmonate esterase activity in vitro. This protein does not act on MeSA, MeGA4, or MEGA9 in vitro. Although MES16 is similar to MES17, a MeIAA hydrolase, two mes16 mutant lines (SALK_151578) and (SALK_139756) do not show altered sensitivity to MeIAA in root growth assays. MES16 transcripts appear t…	2.72326	3.84894e-31	UP
AT3G60961	NA	NA	2.72125	7.25275e-07	UP
AT1G64110	DAA1	NA	2.72117	0.000443059	UP
AT5G42010	NA	NA	2.71873	9.02559e-33	UP
AT3G05360	AtRLP30	NA	2.71524	1.06399e-48	UP
AT3G08040	ATFRD3	Encodes a member of the MATE (multidrug and toxin efflux family), expressed in roots but not shoots. Mutants accumulate excess iron, manganese and zinc, and express root Fe(III) chelatase activity even under iron sufficiency conditions. FRD3 is likely to function in root xylem loading of an iron chelator or other factor necessary for efficient iron uptake out of the xylem or apoplastic space and …	2.71243	4.24506e-05	UP
AT3G28100	UMAMIT45	NA	2.70985	9.2397e-52	UP
AT3G25250	AGC2	Arabidopsis protein kinase	2.70581	7.1306e-18	UP
AT1G65481	NA	NA	2.70406	5.73167e-07	UP
AT4G08290	UMAMIT20	NA	2.70223	5.82813e-108	UP
AT4G39030	EDS5	Encodes an orphan multidrug and toxin extrusion transporter. Essential component of salicylic acid-dependent signaling for disease resistance. Member of the MATE-transporter family. Expression induced by salicylic acid. Mutants are salicylic acid-deficient.	2.70127	2.19743e-50	UP
AT1G10070	ATBCAT-2	Encodes a chloroplast branched-chain amino acid aminotransferase. Complements the yeast leu/iso-leu/val auxotrophy mutant.	2.69974	1.55457e-33	UP
AT1G45145	ATH5	encodes a cytosolic thioredoxin that reduces disulfide bridges of target proteins by the reversible formation of a disulfide bridge between two neighboring Cys residues present in the active site. Thioredoxins have been found to regulate a variety of biological reactions in prokaryotic and eukaryotic cells.	2.69772	7.13226e-88	UP
AT3G03640	BGLU25	Encodes beta-glucosidase (GLUC).	2.69284	7.95679e-117	UP
AT5G05995	NA	NA	2.68837	2.40992e-06	UP
AT2G40113	NA	NA	2.68721	4.29153e-07	UP
AT5G53120	ATSPDS3	encodes a novel spermine synthase and is a paralog of previously characterized spermidine synthases, SPDS1 and SPDS2. SPDS3 forms heterodimers with SDPS2, which in turn forms heterodimers with SDPS1 in vivo. The gene does not complement speDelta3 deficiency of spermidine synthase in yeast but DOES complement speDelta4 deficiency.	2.68588	4.45959e-144	UP
AT3G26820	NA	NA	2.6844	0.0389307	UP
AT5G15940	NA	NA	2.68272	0.0455696	UP
AT2G18660	AtPNP-A	Encodes PNP-A (Plant Natriuretic Peptide A). PNPs are a class of systemically mobile molecules distantly related to expansins; their biological role has remained elusive. PNP-A contains a signal peptide domain and is secreted into the extracellular space. Co-expression analyses using microarray data suggest that PNP-A may function as a component of plant defence response and SAR in particular, an…	2.68133	2.33891e-61	UP
AT4G00700	MCTP9	NA	2.6803	2.19399e-11	UP
AT4G15120	NA	NA	2.67808	4.36103e-16	UP
AT5G63970	RGLG3	NA	2.67005	5.76545e-43	UP
AT1G23550	SRO2	Encodes a protein with similarity to RCD1 but without the WWE domain. The protein does have a PARP signature upstream of the C-terminal protein interaction domain. The PARP signature may bind NAD+ and attach the ADP-ribose-moiety from NAD+ to the target molecule. Its presence suggests a role for the protein in ADP ribosylation.	2.66851	3.3212e-19	UP
AT1G63440	HMA5	The Arabidopsis P-type ATPase HMA5 is involved in Cu detoxification. hma5 mutant plants exhibit Cu hypersensitivity, which is especially dramatic in roots where HMA5 is mostly expressed.	2.66456	2.16037e-32	UP
AT3G48840	NA	NA	2.66283	0.0442716	UP
AT2G23620	ATMES1	Encodes a protein shown to have carboxylesterase activity, methyl salicylate esterase activity, methyl jasmonate esterase activity, and methyl IAA esterase activity in vitro. MES1 appears to be involved in MeSA hydrolysis in planta. Expression of MES1 can restore systemic acquired resistance in SAR-deficient tobacco plants. This protein does not act on MeGA4, or MEGA9 in vitro.	2.65828	0.000316601	UP
AT5G16230	AAD3	NA	2.6542	1.44634e-35	UP
AT1G56550	RGXT3	Encodes a rhamnogalacturonan II specific xylosyltransferase.	2.65371	1.42393e-44	UP
AT5G59820	AtZAT12	Encodes a zinc finger protein involved in high light and cold acclimation. Overexpression of this putative transcription factor increases the expression level of 9 cold-responsive genes and represses the expression level of 15 cold-responsive genes, including CBF genes. Also, lines overexpressing this gene exhibits a small but reproducible increase in freeze tolerance. Because of the repression o…	2.65309	7.09431e-37	UP
AT2G36780	NA	NA	2.64562	4.65662e-17	UP
AT5G27765	NA	NA	2.64522	0.00539396	UP
AT2G36750	UGT73C1	NA	2.64325	0.0133953	UP
AT2G38870	NA	Predicted to encode a PR (pathogenesis-related) peptide that belongs to the PR-6 proteinase inhibitor family. Six putative PR-6-type protein encoding genes are found in Arabidopsis: At2g38900, At2g38870, At5g43570, At5g43580, At3g50020 and At3g46860.	2.64237	1.94505e-114	UP
AT5G48180	AtNSP5	Encodes a nitrile-specifier protein NSP5. NSP5 is one out of five (At3g16400/NSP1, At2g33070/NSP2, At3g16390/NSP3, At3g16410/NSP4 and At5g48180/NSP5) A. thaliana epithiospecifier protein (ESP) homologues that promote simple nitrile, but not epithionitrile or thiocyanate formation.	2.64124	3.2404e-104	UP
AT2G42980	NA	NA	2.63917	1.92259e-05	UP
AT5G07150	NA	NA	2.6336	3.83557e-25	UP
AT5G12030	AT-HSP17.6A	Encodes a cytosolic small heat shock protein with chaperone activity that is induced by heat and osmotic stress and is also expressed late in seed development.	2.62922	0.00030078	UP
AT5G52810	SARD4	NA	2.62421	4.40058e-75	UP
AT5G14760	AO	At5g14760 encodes for L-aspartate oxidase involved in the early steps of NAD biosynthesis. In contrary to the EC 1.4.3.16 (l-aspartate oxidase - deaminating) the enzyme catalyzes the reaction L-aspartate + O2 = iminoaspartate (alpha-iminosuccinate) + H2O2	2.62421	2.9322e-33	UP
AT1G27980	ATDPL1	NA	2.61515	5.974e-84	UP
AT1G78190	AtTRM112a	NA	2.61292	7.11003e-21	UP
AT1G16420	ATMC8	Encodes a metacaspase (cysteine-type endopeptidase) that is involved in promoting programmed cell death in response to hydrogen peroxide (H2O2), UV light, and methyl viologen (MV). Transcript levels rise in response to UV-C, H2O2, and MV. In vitro assays demonstrate that this enzyme has a preference for cleaving after an arginine residue, and it has a pH optimum of 8.0.	2.60991	6.95322e-05	UP
AT1G62935	NA	NA	2.60758	0.00497505	UP
AT1G62760	AtPMEI10	NA	2.6071	0.0111259	UP
AT3G11430	ATGPAT5	Encodes a protein with glycerol-3-phosphate acyltransferase activity, involved in the biosynthesis of suberin polyester.	2.60467	0.0413878	UP
AT3G09520	ATEXO70H4	A member of EXO70 gene family, putative exocyst subunits, conserved in land plants. Arabidopsis thaliana contains 23 putative EXO70 genes, which can be classified into eight clusters on the phylogenetic tree.	2.5982	9.25615e-25	UP
AT5G67340	PUB2	NA	2.59561	1.66723e-39	UP
AT2G39230	LOJ	Encodes a pentatricopeptide protein (LOJ) that is specifically expressed in lateral organ junctions.	2.59407	1.74405e-12	UP
AT1G76760	ATY1	Encodes a y-type thioredoxin (Trx-y1) localized in chloroplast stroma.	2.59256	2.24736e-11	UP
AT4G12735	NA	NA	2.59065	9.25197e-06	UP
AT3G28540	NA	NA	2.59059	5.54331e-56	UP
AT4G26470	NA	NA	2.58325	4.66319e-18	UP
AT4G28390	AAC3	Encodes a mitochondrial ADP/ATP carrier protein. Shown in heterologous systems to be located in the plasma membrane. Has comparable affinity for ADP and ATP (in E.coli).	2.58111	1.54724e-41	UP
AT1G07620	ATOBGM	NA	2.58082	4.24941e-42	UP
AT1G78290	SNRK2-8	NA	2.57762	5.62907e-37	UP
AT5G54620	NA	NA	2.57576	0.00869323	UP
AT5G24870	NA	NA	2.57453	3.84895e-55	UP
AT1G22990	HIPP22	NA	2.57397	3.2645e-14	UP
AT3G22840	ELIP	Encodes an early light-inducible protein.	2.57278	9.38474e-05	UP
AT5G46360	ATKCO3	Encodes AtKCO3, a member of the Arabidopsis thaliana K+ channel family of AtTPK/KCO proteins. AtKCO3 is targeted to the vacuolar membrane. Forms homomeric ion channels in vivo.	2.56652	0.00884266	UP
AT2G30395	ATOFP17	Member of the plant specific ovate protein family of unknown function.	2.56113	7.10289e-07	UP
AT2G28350	ARF10	Involved in root cap cell differentiation.	2.5573	6.50214e-65	UP
AT4G19370	MWL-2	NA	2.55477	2.38145e-21	UP
AT1G21400	NA	NA	2.55471	6.95373e-172	UP
AT4G34131	UGT73B3	NA	2.55398	1.47772e-23	UP
AT1G23730	ATBCA3	NA	2.55194	8.2232e-22	UP
AT3G06890	NA	NA	2.55189	1.5418e-25	UP
AT3G11580	NGAL2	NA	2.55063	3.48105e-47	UP
AT5G64570	ATBXL4	Encodes a beta-d-xylosidase that belongs to family 3 of glycoside hydrolases.	2.5489	2.5925e-76	UP
AT3G16330	NA	NA	2.54724	1.01125e-13	UP
AT1G53100	NA	NA	2.54387	1.20706e-31	UP
AT1G24095	NA	NA	2.54355	1.56523e-16	UP
AT5G44610	MAP18	Encodes a protein with seven repeated VEEKK motifs. RNAi and overexpression experiments suggest that the gene is not involved in cell division but might be consequential for cell shape of epidermal and cortical cells. The protein encoded by this gene binds to cortical microtubules and inhibits tubulin polymerization. Associates to the plasma membrane and interacts with calmodulin and phosphatidyl…	2.54317	0.00182733	UP
AT1G72870	NA	NA	2.54284	6.46414e-05	UP
AT2G02390	ATGSTZ1	Encodes glutathione transferase belonging to the zeta class of GSTs. Naming convention according to Wagner et al. (2002). The protein undergoes spontaneous thiolation following treatment with the oxidant tert-butylhydroperoxide.	2.54214	1.96112e-120	UP
AT3G45330	LecRK-I.1	NA	2.54083	6.07675e-11	UP
AT1G02920	ATGST11	Encodes glutathione transferase belonging to the phi class of GSTs. Naming convention according to Wagner et al. (2002).	2.53762	9.7536e-16	UP
AT2G28400	NA	NA	2.52859	3.81439e-64	UP
AT5G67450	AZF1	Encodes zinc-finger protein. mRNA levels are elevated in response to low temperature, cold temperatures and high salt. The protein is localized to the nucleus and acts as a transcriptional repressor.	2.52429	1.31308e-22	UP
AT4G04540	CRK39	Encodes a cysteine-rich receptor-like protein kinase.	2.52359	7.30586e-30	UP
AT2G32530	ATCSLB03	encodes a gene similar to cellulose synthase	2.52343	1.16504e-37	UP
AT1G47890	AtRLP7	NA	2.52226	3.82635e-22	UP
AT4G33540	NA	NA	2.52141	3.74118e-130	UP
AT5G63680	NA	NA	2.51848	8.60405e-175	UP
AT5G67080	MAPKKK19	member of MEKK subfamily	2.51656	7.52589e-24	UP
AT4G02280	ATSUS3	Encodes a protein with sucrose synthase activity (SUS3). It appears to be important for sucrose metabolism in developing seeds, especially during the late maturation phase, about 18 days after flowering.	2.51383	6.97849e-53	UP
AT5G22560	NA	NA	2.51054	2.74058e-07	UP
AT4G16600	PGSIP8	NA	2.50874	3.21775e-06	UP
AT3G02040	AtGDPD1	NA	2.50748	5.9862e-41	UP
AT3G07150	NA	NA	2.5053	0.0301212	UP
AT3G05820	A/N-InvH	Encodes a putative plastid-targeted alkaline/neutral invertase.	2.50475	0.0413706	UP
AT3G10420	SPD1	NA	2.50462	1.61275e-179	UP
AT1G31885	NA	NA	2.50248	0.000290159	UP
AT2G26310	AtFAP2	NA	2.5023	1.00186e-07	UP
AT5G61430	ANAC100	NA	2.50127	4.58424e-06	UP
AT3G11080	AtRLP35	NA	2.50117	5.93635e-46	UP
AT4G29850	NA	NA	2.49876	8.99605e-13	UP
AT5G41680	NA	NA	2.49775	0.00487861	UP
AT1G58190	AtRLP9	NA	2.49411	6.83596e-37	UP
AT5G63130	NA	NA	2.49061	8.73416e-19	UP
AT5G64790	NA	NA	2.48959	0.000238524	UP
AT1G54100	ALDH7B4	Aldehyde dehydrogenase	2.48946	5.2491e-174	UP
AT4G20000	NA	NA	2.48811	6.8274e-22	UP
AT5G12930	NA	NA	2.485	3.64702e-44	UP
AT3G16900	NA	NA	2.48139	0.0392995	UP
AT2G07695	NA	NA	2.4784	0.0143362	UP
AT5G14640	ATSK13	NA	2.47323	1.99735e-54	UP
AT4G20970	NA	NA	2.4708	7.53283e-09	UP
AT5G02100	ORP3A	Encodes a protein that binds to beta-sitosterol and localizes to the ER. The WFDE motif in ORP3a appears to be important for a direct interaction with PVA12 [Plant VAMP-Associated protein 12]. Mutation of this motif causes ORP3a to relocalize to the Golgi and cytosol. The interaction between PVA12 and ORP3a does not appear to be sterol-dependent.	2.47006	1.08641e-46	UP
AT5G17300	RVE1	Myb-like transcription factor that regulates hypocotyl growth by regulating free auxin levels in a time-of-day specific manner.	2.46709	1.09131e-06	UP
AT2G38860	DJ-1e	Encodes protease I (pfpI)-like protein YLS5.	2.46553	1.56642e-95	UP
AT5G64110	NA	NA	2.46538	2.35781e-06	UP
AT4G27450	NA	NA	2.4642	1.21356e-102	UP
AT2G44370	NA	NA	2.46348	3.11913e-08	UP
AT2G30840	NA	encodes a protein whose sequence is similar to 2-oxoglutarate-dependent dioxygenase	2.4616	1.04654e-07	UP
AT5G21960	NA	encodes a member of the DREB subfamily A-5 of ERF/AP2 transcription factor family. The protein contains one AP2 domain. There are 15 members in this subfamily including RAP2.1, RAP2.9 and RAP2.10.	2.46065	5.22545e-11	UP
AT1G21390	emb2170	NA	2.46033	7.81036e-50	UP
AT2G35910	NA	NA	2.46027	9.8866e-14	UP
AT1G07900	NA	NA	2.45897	6.28244e-26	UP
AT3G05165	NA	NA	2.45821	1.30487e-82	UP
AT5G54610	ANK	Induced in response to Salicylic acid. Belongs to the ankyrin repeat protein family.	2.45723	4.16295e-144	UP
AT1G48260	CIPK17	Encodes a member of the SNF1-related kinase (SnRK) gene family (SnRK3.21), which has also been reported as a member of the CBL-interacting protein kinases (CIPK17).	2.45547	1.73735e-15	UP
AT5G39100	GLP6	germin-like protein (GLP6)	2.4508	7.85341e-06	UP
AT1G68290	AtBFN2	Encodes a putative endonuclease but no demonstrable endonuclease activity, either towards single stranded DNA or mismatches, has been seen in vitro.	2.44958	2.27216e-06	UP
AT1G62570	FMO	belongs to the flavin-monooxygenase (FMO) family, encodes a glucosinolate S-oxygenase that catalyzes the conversion of methylthioalkyl glucosinolates to methylsulfinylalkyl glucosinolates	2.44938	3.08013e-33	UP
AT2G44240	NA	NA	2.44454	8.92131e-14	UP
AT4G26990	NA	NA	2.44447	3.91885e-40	UP
AT5G58620	TZF9	NA	2.44334	6.67028e-61	UP
AT1G07853	NA	NA	2.44236	0.00181756	UP
AT1G74710	ATICS1	Encodes a protein with isochorismate synthase activity. Mutants fail to accumulate salicylic acid. Its function may be redundant with that of ICS2 (AT1G18870).	2.44137	1.07592e-13	UP
AT4G27830	AtBGLU10	NA	2.44033	1.03606e-129	UP
AT4G24026	NA	NA	2.43924	2.28664e-17	UP
AT1G67650	NA	NA	2.43749	1.53361e-18	UP
AT4G09030	AGP10	Encodes arabinogalactan protein (AGP10).	2.43715	1.65457e-72	UP
AT3G61450	ATSYP73	syntaxin of plants 73 (SYP73)	2.43683	0.0128607	UP
AT5G05390	LAC12	putative laccase, a member of laccase family of genes (17 members in Arabidopsis).	2.43594	0.0132868	UP
AT4G26120	NA	NA	2.43496	2.81603e-28	UP
AT3G29240	NA	NA	2.43488	3.35419e-62	UP
AT3G51430	SSL5	Although this enzyme is predicted to encode a strictosidine synthase (SS), it lacks a conserved catalytic glutamate residue found in active SS enzymes and it is not expected to have SS activity.	2.43443	2.50779e-145	UP
AT2G18950	ATHPT	Encodes homogentisate phytyltransferase involved in tocopherol biosynthesis. Has impact on seed longevity and plays a role in the adaptation to low temperature stress, notably phloem loading.	2.43409	8.02687e-115	UP
AT1G64970	G-TMT	gamma-tocopherol methyltransferase (g-TMT) mRNA, nuclear; mutant has Deficient in alpha and beta tocopherol; Accumulates gamma tocopherol in leaves	2.4302	7.89603e-67	UP
AT5G40000	NA	NA	2.42658	0.00431218	UP
AT4G07820	NA	NA	2.42629	0.00243485	UP
AT1G51920	NA	NA	2.42473	1.70533e-05	UP
AT3G54640	TRP3	Catalyzes the conversion of indole-3-glycerolphosphate to indole, the penultimate reaction in the biosynthesis of tryptophan. Functions as a heterocomplex with tryptophan synthase beta subunit (TSA2).	2.42376	3.16627e-111	UP
AT2G46830	AtCCA1	Encodes a transcriptional repressor that performs overlapping functions with LHY in a regulatory feedback loop that is closely associated with the circadian oscillator of Arabidopsis. Binds to the evening element in the promoter of TOC1 and represses TOC1 transcription. CCA1 and LHY colocalize in the nucleus and form heterodimers in vivo. CCA1 and LHY function synergistically in regulating circad…	2.41925	1.35245e-16	UP
AT2G36800	DOGT1	Encodes a DON-Glucosyltransferase. The UGT73C5 glucosylates both brassinolide and castasterone in the 23-O position. The enzyme is presumably involved in the homeostasis of those steroid hormones hence regulating BR activity. Transgenic plants overexpressing UGT73C5 show a typical BR-deficient phenotype.	2.41431	5.14598e-43	UP
AT5G01820	ATCIPK14	Encodes a CBL-interacting serine/threonine protein kinase.	2.41389	5.36377e-150	UP
AT3G15534	NA	NA	2.41239	7.129e-06	UP
AT5G43180	NA	NA	2.40791	0.000910336	UP
AT3G49860	ARLA1B	A member of ARF-like GTPase family. A thaliana has 21 members, in two subfamilies, ARF and ARF-like (ARL) GTPases.	2.40659	0.00209535	UP
AT1G29290	NA	NA	2.40649	4.13951e-14	UP
AT4G39950	CYP79B2	Belongs to cytochrome P450 and is involved in tryptophan metabolism. Converts Trp to indo-3-acetaldoxime (IAOx), a precursor to IAA and indole glucosinolates.	2.40588	2.94435e-114	UP
AT5G15830	AtbZIP3	NA	2.40514	2.27717e-05	UP
AT2G29990	NDA2	NA	2.40386	2.68167e-85	UP
AT1G74190	NA	NA	2.4005	0.0279885	UP
AT1G22930	NA	NA	2.39971	2.54885e-188	UP
AT5G45440	NA	NA	2.39939	5.8406e-06	UP
AT1G73860	NA	NA	2.39909	0.016802	UP
AT3G14680	CYP72A14	putative cytochrome P450	2.39733	1.1928e-13	UP
AT3G26440	NA	NA	2.39688	2.53912e-58	UP
AT5G52900	MAKR6	NA	2.39587	2.43549e-76	UP
AT5G55010	NA	NA	2.39361	0.00107813	UP
AT5G46871	NA	Encodes a defensin-like (DEFL) family protein.	2.39336	5.15705e-41	UP
AT5G39670	CML46	NA	2.38378	5.93617e-11	UP
AT4G16920	NA	NA	2.38258	2.84899e-17	UP
AT1G74290	NA	NA	2.37431	8.88681e-12	UP
AT5G46180	DELTA-OAT	Encodes an ornithine delta-aminotransferase that is transcriptionally up-regulated in young seedlings and in response to salt stress. It is unlikely to play a role in salt-stress-induced proline accumulation, however, it appears to participate in arginine and ornithine catabolism.	2.37282	1.50422e-139	UP
AT5G51630	NA	NA	2.36987	3.54215e-42	UP
AT5G46230	NA	NA	2.36408	1.73994e-64	UP
AT5G54160	AtCOMT	A caffeic acid/5-hydroxyferulic acid O-methyltransferase. Interacts with 14-4-3 proteins in yeast 2 hybrid assay. AtOMT1 (At5g54160) encodes a flavonol 3-O-methyltransferase that is highly active towards quercetin and myricetin. The substrate specificity identifies the enzyme as flavonol 3-methyltransferase which replaces the former annotation of the gene to encode a caffeic acid/5-hydroxyferulic…	2.36307	3.76747e-121	UP
AT3G51860	ATCAX3	NA	2.36264	9.72804e-12	UP
AT2G25440	AtRLP20	NA	2.35928	1.30634e-20	UP
AT4G22920	ATNYE1	Similar to the tomato senescence-inducible chloroplast stay-green protein 1. It is upregulated during maximal senescence in the Arabidopsis life cycle, especially in senescent leaves.	2.35692	9.34714e-96	UP
AT1G26930	NA	NA	2.35621	3.28061e-36	UP
AT1G06570	HPD	Mutation of the PDS1 locus disrupts the activity of p-hydroxyphenylpyruvate dioxygenase (HPPDase), the first committed step in the synthesis of both plastoquinone and tocopherols in plants.	2.35448	9.74856e-110	UP
AT2G28710	NA	NA	2.35073	4.79814e-09	UP
AT3G25610	ALA10	NA	2.34948	1.32312e-40	UP
AT1G67980	CCOAMT	Encodes S-adenosyl-L-methionine: transcaffeoyl Coenzyme A 3-O-methyltransferase.	2.34905	2.76414e-24	UP
AT1G73810	NA	NA	2.34409	7.19672e-29	UP
AT3G11600	GIR2	NA	2.34321	2.47945e-10	UP
AT3G57100	NA	NA	2.34262	1.43113e-05	UP
AT5G52770	NA	NA	2.34244	0.0447922	UP
AT4G02320	NA	NA	2.34235	0.0138658	UP
AT1G33030	NA	NA	2.34227	8.65084e-26	UP
AT1G66550	NA	NA	2.34151	0.0395324	UP
AT4G35180	LHT7	NA	2.33822	2.32116e-05	UP
AT5G64120	AtPRX71	encodes a cell wall bound peroxidase that is induced by hypo-osmolarity	2.33721	1.63396e-65	UP
AT5G53110	NA	NA	2.33066	1.33899e-07	UP
AT2G31020	ORP1A	NA	2.3274	1.44186e-27	UP
AT3G03440	NA	NA	2.32707	6.53257e-69	UP
AT5G53320	NA	NA	2.32693	0.0035611	UP
AT3G63050	NA	NA	2.32372	4.8875e-10	UP
AT3G29575	AFP3	NA	2.3216	5.33934e-73	UP
AT2G24100	ASG1	NA	2.31776	1.78382e-32	UP
AT5G16900	NA	NA	2.31649	3.18427e-06	UP
AT1G52565	NA	NA	2.31372	3.07516e-07	UP
AT3G15340	PPI2	Hypothetical protein similar to PPI1, a protein that interacts with the plasma membrane H+ ATPase AHA1	2.31311	2.76142e-08	UP
AT2G39200	ATMLO12	A member of a large family of seven-transmembrane domain proteins specific to plants, homologs of the barley mildew resistance locus o (MLO) protein. The Arabidopsis genome contains 15 genes encoding MLO proteins, with localization in plasma membrane. Phylogenetic analysis revealed four clades of closely-related AtMLO genes. ATMLO6 belongs to the clade IV, with AtMLO2, AtMLO3 and AtMLO12. The gen…	2.31168	2.96084e-68	UP
AT2G04070	NA	NA	2.30769	2.45118e-29	UP
AT1G77145	NA	NA	2.30748	1.58954e-11	UP
AT4G04620	ATG8B	NA	2.30706	4.5193e-41	UP
AT2G02060	NA	NA	2.3066	3.53627e-15	UP
AT3G19580	AZF2	Encodes zinc finger protein. mRNA levels are upregulated in response to ABA, high salt, and mild dessication. The protein is localized to the nucleus and acts as a transcriptional repressor.	2.30461	5.7633e-60	UP
AT1G02850	BGLU11	NA	2.30209	3.27515e-66	UP
AT5G47120	ATBI-1	Encodes BI-1, a homolog of mammalian Bax inhibitor 1. Functions as an attenuator of biotic and abiotic types of cell death. Bax-induced cell death can be downregulated by ectopically expressing AtBI in planta.	2.30198	2.06719e-70	UP
AT5G62770	NA	NA	2.30074	1.54574e-51	UP
AT5G52300	LTI65	encodes a protein that is induced in expression in response to water deprivation such as cold, high-salt, and dessication. The response appears to be via abscisic acid. The promoter region contains two ABA-responsive elements (ABREs) that are required for the dehydration-responsive expression of rd29B as cis-acting elements. Protein is a member of a gene family with other members found plants, an…	2.30007	5.21463e-10	UP
AT4G14390	NA	NA	2.29916	1.69567e-40	UP
AT3G27270	NA	NA	2.29885	9.80987e-18	UP
AT1G69810	ATWRKY36	member of WRKY Transcription Factor; Group II-b	2.29377	1.65622e-11	UP
AT2G32020	NA	NA	2.29351	0.0316111	UP
AT1G01340	ACBK1	member of Cyclic nucleotide gated channel family	2.29321	4.13674e-65	UP
AT4G10960	UGE5	Encodes a protein with UDP-D-glucose 4-epimerase activity.	2.29112	5.88459e-29	UP
AT4G13395	DVL10	NA	2.28917	2.01127e-16	UP
AT4G38540	NA	NA	2.28842	1.57822e-37	UP
AT5G40510	NA	NA	2.28413	0.000450279	UP
AT3G56170	CAN	Encodes a calcium-dependent nuclease with similarity to staphylococcal nuclease.	2.28358	6.30849e-104	UP
AT1G68740	PHO1;H1	Encodes PHO1;H1, a member of the PHO1 family. Involved in inorganic phosphate (Pi) transport and homeostasis. Complements pho1 mutation.	2.28155	9.85952e-25	UP
AT3G26590	NA	NA	2.28126	2.02858e-84	UP
AT2G47800	ABCC4	Encodes a plasma membrane localized ATPase transporter involved in multidrug transport. The expression of this gene is upregulated by herbicide safeners such as benoxacor, fluxofenim and fenclorim.	2.27977	2.54705e-50	UP
AT4G12120	ATSEC1B	member of KEULE Gene Family	2.27721	1.08918e-90	UP
AT5G61820	NA	NA	2.2757	1.62509e-117	UP
AT2G39050	ArathEULS3	NA	2.27458	8.83951e-80	UP
AT2G21187	NA	NA	2.27331	0.000697241	UP
AT5G01640	PRA1.B5	NA	2.27278	8.86974e-23	UP
AT3G13910	NA	NA	2.26986	7.05958e-41	UP
AT1G55920	AtSAT1	Encodes a chloroplast/cytosol localized serine O-acetyltransferase involved in sulfur assimilation and cysteine biosynthesis. Expressed in the vascular system.	2.26876	1.27262e-86	UP
AT2G29460	ATGSTU4	Encodes glutathione transferase belonging to the tau class of GSTs. Naming convention according to Wagner et al. (2002).	2.26874	5.92745e-31	UP
AT3G13090	ABCC6	member of MRP subfamily	2.26614	6.19626e-16	UP
AT1G64170	ATCHX16	member of Putative Na+/H+ antiporter family	2.26454	3.13777e-61	UP
AT2G06255	EFL3	NA	2.26222	2.56728e-09	UP
AT5G39110	NA	NA	2.26144	0.00831043	UP
AT5G48290	NA	NA	2.26	3.64235e-15	UP
AT4G20460	NA	NA	2.25932	4.54591e-23	UP
AT3G21690	NA	NA	2.25614	4.02766e-86	UP
AT2G29090	CYP707A2	Encodes a protein with ABA 8'-hydroxylase activity, involved in ABA catabolism. Member of the CYP707A gene family. This gene predominantly accumulates in dry seeds and is up-regulated immediately following imbibition. CYP707A2 appears to play a major role in the rapid decrease in ABA levels during early seed imbibition.	2.25412	9.63053e-13	UP
AT1G55265	NA	NA	2.25349	1.92059e-47	UP
AT4G02520	ATGSTF2	Encodes glutathione transferase belonging to the phi class of GSTs. Naming convention according to Wagner et al. (2002). The expression of this gene is upregulated by herbicide safeners such as benoxacor and fenclorim.	2.2533	1.69744e-50	UP
AT4G25070	NA	NA	2.25245	3.8295e-35	UP
AT5G43860	ATCLH2	Encodes a chlorophyllase, the first enzyme in chlorophyll degradation. It catalyzes the hydrolysis of the ester bond to chlorophyllide and phytol. AtCLH2 has a typical signal sequence for the chloroplast. Gene expression does not respond to methyljasmonate, a known promoter of senescence and chlorophyll degradation.	2.25231	1.44119e-26	UP
AT3G15510	ANAC056	Note of caution: not to be confused with another protein (AtNAC6 locus AT5G39610) which on occasion has also been referred to as AtNAC2.	2.24649	5.85469e-31	UP
AT5G39000	NA	NA	2.2442	0.00511765	UP
AT5G56960	NA	NA	2.24403	9.23679e-13	UP
AT4G21980	APG8A	Encodes APG8, a component of autophagy conjugation pathway. Delivered to the lumens of vacuole under nitrogen-starvation condition. Highest expression in flowers. mRNA abundance increased during dark-induced carbon starvation. Predominantly cytoplasmic with or without N starvation. Upon concanamycin A the protein accumulates in the central vacuole as punctuate structures that resemble autophagic …	2.24227	6.67132e-130	UP
AT3G53160	UGT73C7	NA	2.24052	1.40195e-07	UP
AT3G14050	AT-RSH2	NA	2.2356	7.5697e-38	UP
AT4G34230	ATCAD5	Encodes a catalytically active cinnamyl alcohol dehydrogenase which uses p-coumaryl aldehyde as a preferred substrate. It can also use sinapyl, caffeyl, coniferyl and d-hydroxyconiferyl aldehydes as substrates.	2.2332	5.61609e-65	UP
AT2G22470	AGP2	Encodes arabinogalactan-protein (AGP2).	2.23184	7.66763e-27	UP
AT4G37900	AtGRDP2	NA	2.23136	1.53854e-21	UP
AT5G51030	NA	NA	2.23075	0.0183629	UP
AT1G34180	anac016	NA	2.22761	1.51775e-37	UP
AT2G42360	NA	NA	2.22433	3.98647e-06	UP
AT3G11150	NA	NA	2.2231	0.00345392	UP
AT4G30460	NA	NA	2.22019	1.74789e-57	UP
AT3G49690	ATMYB84	Putative homolog of the Blind gene in tomato. Together with RAX1 and RAX3 belong to the class R2R3 MYB genes; encoded by the Myb-like transcription factor MYB84, regulates axillary meristem formation.	2.21803	0.00314554	UP
AT3G21700	ATSGP2	Monomeric G protein. Expressed in root epidermal cells that are destined to become atrichoblasts. Also expressed during pollen development and in the pollen tube tip.	2.21639	4.73708e-57	UP
AT2G36770	NA	NA	2.2161	2.49026e-11	UP
AT4G20320	CTPS4	NA	2.21518	1.44254e-21	UP
AT5G42380	AtCML37	NA	2.21449	1.04844e-15	UP
AT5G47050	NA	NA	2.21314	1.96885e-21	UP
AT1G28190	NA	NA	2.21287	4.51317e-47	UP
AT3G51440	NA	NA	2.21078	6.50346e-51	UP
AT5G07322	NA	NA	2.21028	2.56859e-08	UP
AT1G79520	NA	NA	2.209	8.17126e-37	UP
AT1G26420	AtBBE7	NA	2.20518	4.90162e-23	UP
AT3G56400	ATWRKY70	member of WRKY Transcription Factor; Group III. Function as activator of SA-dependent defense genes and a repressor of JA-regulated genes. WRKY70-controlled suppression of JA-signaling is partly executed by NPR1.	2.2038	2.25903e-95	UP
AT3G24170	ATGR1	Encodes a cytosolic glutathione reductase.	2.2025	2.92484e-137	UP
AT3G03310	ATLCAT3	NA	2.19871	1.41936e-74	UP
AT2G20560	DNAJ	NA	2.19845	6.82522e-18	UP
AT4G32940	AEP3	Encodes a vacuolar processing enzyme belonging to a novel group of cysteine proteinases that is expressed in vegetative organs and is upregulated in association with various types of cell death and under stressed conditions. They are essential in processing seed storage proteins and for mediating the susceptible response of toxin-induced cell death.	2.19464	1.50801e-141	UP
AT1G56010	anac021	Encodes a transcription factor involved in shoot apical meristem formation and auxin-mediated lateral root formation. The gene is thought not to be involved in stress responses (NaCl, auxins, ethylene). NAC1 (NAC1)	2.19426	1.40052e-57	UP
AT5G24140	SQP2	Encodes a protein with similarity to squalene monoxygenases.	2.19204	0.0316082	UP
AT4G21903	NA	NA	2.19146	2.2541e-23	UP
AT5G01250	NA	NA	2.19127	0.00419612	UP
AT5G15850	ATCOL1	Homologous to the flowering-time gene CONSTANS.	2.18743	1.39953e-22	UP
AT5G56870	BGAL4	NA	2.18698	3.81356e-44	UP
AT3G10500	AIF	NA	2.18691	1.19651e-37	UP
AT2G03505	NA	NA	2.1866	8.8264e-25	UP
AT2G01610	NA	NA	2.1769	8.32456e-14	UP
AT5G24080	NA	NA	2.17522	0.00272723	UP
AT5G64430	NA	NA	2.17394	7.96641e-105	UP
AT5G42830	NA	NA	2.17288	1.52335e-08	UP
AT1G64400	LACS3	NA	2.17251	5.4852e-65	UP
AT4G18210	ATPUP10	Member of a family of proteins related to PUP1, a purine transporter. May be involved in the transport of purine and purine derivatives such as cytokinins, across the plasma membrane.	2.17172	2.10982e-31	UP
AT5G47140	GATA27	Encodes a member of the GATA factor family of zinc finger transcription factors.	2.1707	8.15461e-80	UP
AT2G41640	NA	NA	2.16875	3.19061e-15	UP
AT3G27410	NA	NA	2.16406	8.3067e-05	UP
AT3G12320	LNK3	NA	2.16227	1.52881e-30	UP
AT1G11100	FRG5	NA	2.16222	9.01669e-09	UP
AT2G12190	NA	NA	2.16222	7.56921e-78	UP
AT1G08940	NA	NA	2.16191	5.61721e-42	UP
AT1G70140	ATFH8	Encodes a group I formin. Binds to F-actin barbed ends. Has severing actin filaments activity. Binds profilin. Involved in the initiation and tip growth of root hairs through regulation of actin cytoskeleton.	2.16173	2.78742e-37	UP
AT5G03350	NA	NA	2.1612	5.84936e-63	UP
AT4G18170	ATWRKY28	member of WRKY Transcription Factor; Group II-c	2.15986	1.75809e-13	UP
ATMG00560	NA	NA	2.15888	0.0413526	UP
ATMG01200	ORF294	hypothetical protein	2.15857	0.0435781	UP
AT4G16000	NA	NA	2.15704	1.68751e-27	UP
AT1G66725	NA	NA	2.15567	3.70192e-06	UP
AT5G27420	ATL31	Encodes CNI1 (Carbon/Nitrogen Insensitive1) (also named as ATL31), a RING type ubiquitin ligase that functions in the Carbon/Nitrogen response for growth phase transition in Arabidopsis seedlings.	2.15519	2.08998e-26	UP
AT5G23160	NA	NA	2.1545	2.5775e-12	UP
AT2G35000	ATL2G	E3 ligase-like protein induced by chitin oligomers.	2.15363	1.12455e-06	UP
AT5G54500	FQR1	Encodes a flavin mononucleotide-binding flavodoxin-like quinone reductase that is a primary auxin-response gene.	2.15176	7.32184e-69	UP
AT2G15220	NA	NA	2.15167	1.22149e-05	UP
AT4G23885	NA	NA	2.15018	1.0602e-33	UP
AT2G05940	RIPK	NA	2.15002	2.28712e-41	UP
AT1G67810	SUFE2	Encodes a protein capable of stimulating the cysteine desulfurase activity of CpNifS (AT1G08490) in vitro. SufE2:GFP localizes to the chloroplasts where it is likely to play a role in iron-sulfur cluster assembly. Transcript levels for this gene are high in the pollen relative to other organs based on RT-PCR analysis.	2.14871	6.27676e-21	UP
AT3G12220	scpl16	NA	2.14862	4.22043e-24	UP
AT1G51850	SIF2	NA	2.14484	4.74097e-34	UP
AT2G29490	ATGSTU1	Encodes glutathione transferase belonging to the tau class of GSTs. Naming convention according to Wagner et al. (2002).	2.1437	7.60836e-24	UP
AT5G09440	EXL4	NA	2.14334	1.93618e-61	UP
AT5G65210	TGA1	Encodes TGA1, a redox-controlled regulator of systemic acquired resistance. TGA1 targets the activation sequence-1 (as-1) element of the promoter region of defense proteins. TGA1 are S-nitrosylated.	2.1427	9.37045e-69	UP
AT2G39220	PLA	NA	2.14163	1.05348e-60	UP
AT4G24340	NA	NA	2.14137	0.000108627	UP
AT1G14870	AtPCR2	NA	2.13977	2.64951e-07	UP
AT4G35630	PSAT1	Encodes a phosphoserine aminotransferase which is involved in serine biosynthesis in the chloroplast which operates via the phosphorylated pathway.	2.13783	5.40705e-75	UP
AT5G49525	NA	NA	2.137	5.69882e-08	UP
AT5G44563	NA	NA	2.13649	0.00779114	UP
AT3G05327	NA	NA	2.13496	0.0387386	UP
AT4G21840	ATMSRB8	NA	2.13374	9.39229e-06	UP
AT5G40240	UMAMIT40	NA	2.13344	3.02739e-78	UP
AT1G62300	ATWRKY6	Encodes a transcription factor WRKY6. Regulates Phosphate1 (Pho1) expression in response to low phosphate (Pi) stress.	2.13316	4.25775e-29	UP
AT5G35370	NA	NA	2.1288	3.86486e-55	UP
AT1G72890	NA	NA	2.12792	4.69094e-63	UP
AT4G12350	AtMYB42	Encodes a putative transcription factor (MYB42).	2.12606	0.0075924	UP
AT1G10410	NA	NA	2.12556	2.73501e-89	UP
AT4G25880	APUM6	Encodes a member of the Arabidopsis Pumilio (APUM) proteins containing PUF domain (eight repeats of approximately 36 amino acids each). PUF proteins regulate both mRNA stability and translation through sequence-specific binding to the 3' UTR of target mRNA transcripts.	2.12397	1.70526e-122	UP
AT1G70000	MYBD	NA	2.12265	1.75159e-24	UP
AT3G01840	LYK2	NA	2.12066	0.00586649	UP
AT4G33040	ROXY21	NA	2.11807	4.9362e-18	UP
AT3G17810	PYD1	Encodes a protein predicted to have dihydropyrimidine dehydrogenase activity. Its activity has not been demonstrated in vivo, but, it is required for efficient uracil catabolism in Arabidopsis. It localizes to the plastid.	2.1174	7.05732e-166	UP
AT2G37970	AtHBP2	NA	2.11728	1.68902e-39	UP
AT2G27660	NA	NA	2.11602	4.01646e-21	UP
AT2G31990	NA	NA	2.11566	1.54886e-20	UP
AT5G51465	NA	NA	2.11563	2.73481e-07	UP
AT2G37980	NA	NA	2.11555	8.85681e-21	UP
AT3G13310	DJC66	NA	2.11407	1.45543e-72	UP
AT1G69050	NA	NA	2.11358	0.00181896	UP
AT2G28510	DOF2.1	NA	2.11181	3.68092e-46	UP
AT3G25882	NIMIN-2	encodes a kinase that physically interacts with NPR1/NIM1	2.11168	4.17131e-22	UP
AT1G80450	NA	NA	2.11105	1.33776e-21	UP
AT4G39955	NA	NA	2.11067	1.26856e-21	UP
AT3G21420	LBO1	NA	2.10853	0.0178278	UP
AT2G39210	NA	NA	2.10807	2.14875e-32	UP
AT1G63720	NA	NA	2.1079	1.64894e-33	UP
AT2G18210	NA	NA	2.10712	3.13532e-07	UP
AT1G14330	NA	NA	2.10599	8.50928e-53	UP
AT3G26500	PIRL2	Encodes PIRL2, a member of the Plant Intracellular Ras-group-related LRRs (Leucine rich repeat proteins). PIRLs are a distinct, plant-specific class of intracellular LRRs that likely mediate protein interactions, possibly in the context of signal transduction.	2.10409	1.40687e-20	UP
AT3G19660	NA	NA	2.10392	1.07844e-28	UP
AT4G21580	NA	NA	2.10285	1.54028e-83	UP
AT2G35950	EDA12	NA	2.10103	0.00676614	UP
AT1G02450	NIMIN-1	NIMIN1 modulates PR gene expression according the following model: NPR1 forms a ternary complex with NIMIN1 and TGA factors upon SAR induction that binds to a positive regulatory cis-element of the PR-1 promoter, termed LS7. This leads to PR-1 gene induction. NIMIN1 decreases transcriptional activation, possibly through its EAR motif, which results in fine-tuning of PR-1 gene expression.	2.09954	9.38043e-49	UP
AT1G05570	ATGSL06	Encodes a callose synthase 1 catalytic subunit . Member of Glycosyltransferase Family- 48.	2.09915	7.04598e-90	UP
AT2G42480	NA	NA	2.09787	0.00747145	UP
AT5G27060	AtRLP53	NA	2.09703	4.53227e-20	UP
AT1G08050	NA	NA	2.09442	6.05737e-29	UP
AT1G75170	NA	NA	2.09277	1.64878e-38	UP
AT4G30270	MERI-5	encodes a protein similar to endo xyloglucan transferase in sequence. It is also very similar to BRU1 in soybean, which is involved in brassinosteroid response.	2.09166	1.33442e-136	UP
AT2G17730	NIP2	Intrinsic thylakoid membrane protein that fixes RPOTmp on the stromal side of the thylakoid membrane.	2.09104	1.09691e-43	UP
AT1G72120	AtNPF5.14	NA	2.09064	1.23316e-61	UP
AT4G25390	NA	NA	2.08971	9.1694e-38	UP
AT1G05783	NA	NA	2.08701	0.0173266	UP
AT1G09240	ATNAS3	Encodes a nicotianamine synthase.	2.08562	3.29173e-22	UP
AT2G29750	UGT71C1	NA	2.08424	3.35772e-09	UP
AT1G15790	NA	NA	2.08205	9.83565e-26	UP
AT3G26830	CYP71B15	Mutations in pad3 are defective in biosynthesis of the indole derived phytoalexin camalexin. Encodes a cytochrome P450 enzyme that catalyzes the conversion of dihydrocamalexic acid to camalexin.	2.08066	7.0338e-08	UP
AT1G77880	NA	NA	2.08016	0.0365143	UP
AT1G55230	NA	NA	2.07279	0.0141206	UP
AT1G02390	ATGPAT2	Encodes a member of a family of proteins with glycerol-3-phosphate acyltransferase activity.	2.07181	4.98423e-14	UP
AT5G18130	NA	NA	2.07115	7.10312e-56	UP
AT2G32960	AtPFA-DSP2	NA	2.07055	2.36233e-11	UP
AT2G25470	AtRLP21	NA	2.06754	2.32184e-09	UP
AT2G40200	NA	NA	2.06713	2.11268e-05	UP
AT2G16790	NA	NA	2.0649	1.01701e-17	UP
AT5G40690	NA	NA	2.06274	2.92305e-23	UP
AT3G29035	ANAC059	Encodes a protein with transcription factor activity. Note: this protein (AT3G29035) on occasion has also been referred to as AtNAC3, not to be confused with the AtNAC3 found at locus AT3G15500.	2.06205	9.17705e-13	UP
AT3G58780	AGL1	One of two genes (SHP1 and SHP2) that are required for fruit dehiscence. The two genes control dehiscence zone differentiation and promote the lignification of adjacent cells.	2.06024	0.0173718	UP
AT1G21000	NA	NA	2.05896	7.75095e-39	UP
AT1G65820	NA	NA	2.05895	8.56164e-142	UP
AT4G01070	GT72B1	the glycosyltransferase (UGT72B1) is involved in metabolizing xenobiotica (chloroaniline and chlorophenole). Comparison between wild type and knock-out mutant demonstrates the central role of this gene for metabolizing chloroaniline but significantly less for chlorophenole. The glucosyltransferase preferred UDP-xylose over UDP-glucose indicating its (additional) functioning as a xylosyltransferas…	2.05856	5.35483e-99	UP
AT5G58770	AtcPT4	NA	2.05815	2.478e-14	UP
AT2G46150	NA	NA	2.05794	6.35619e-17	UP
AT4G14450	PH1	NA	2.05765	2.03649e-07	UP
AT3G26170	CYP71B19	putative cytochrome P450	2.05543	3.5069e-81	UP
AT4G26270	PFK3	NA	2.05524	4.37175e-112	UP
AT5G18350	NA	NA	2.05522	2.24653e-05	UP
AT3G51660	NA	NA	2.05418	1.51908e-64	UP
AT1G64065	NA	NA	2.05269	7.3293e-12	UP
AT5G24240	AtPI4Kgamma3	NA	2.05125	6.79265e-13	UP
AT3G48890	ATMAPR3	putative progesterone-binding protein homolog (Atmp2) mRNA,	2.04877	6.86651e-93	UP
AT1G73805	SARD1	NA	2.0473	2.40946e-27	UP
AT2G30766	FEP1	NA	2.04626	1.92049e-29	UP
AT1G47560	SEC3B	Encodes a member of the exocyst complex gene family. The exocyst is a protein complex involved in tethering vesicles to the plasma membrane during regulated or polarized secretion.	2.04558	2.91251e-21	UP
AT2G19570	AT-CDA1	Encodes a cytidine deaminase that deaminates cytidine and deoxycytidine and is competitively inhibited by cytosine-containing compounds.	2.04383	1.3204e-33	UP
AT5G45380	ATDUR3	NA	2.04293	3.7336e-51	UP
AT4G22470	NA	NA	2.04145	5.31289e-21	UP
AT1G21410	SKP2A	AtSKP2;1 is a homolog of human SKP2, the human F-box protein that recruits E2F1. Contains an F-box motif at the N-terminal region and a C-terminal Leu-rich repeat domain. Forms part of an E3-ubiquitin-ligase SCF (Skp1, cullin, F-box) complex and recruits phosphorylated AtE2Fc, a transcriptional factor that might play a role in cell division and during the transition from skotomorphogenesis to pho…	2.03801	2.16435e-32	UP
AT1G09100	RPT5B	Encodes RPT5b (Regulatory Particle 5b), one of the six AAA-ATPases of the proteasome regulatory particle. Essential for gametophyte development. In Arabidopsis, the RPT5 subunit is encoded by two highly homologous genes, RPT5a and RPT5b. RPT5a and RPT5b show accession-dependent functional redundancy. In Wassilewskija (Ws) accession: mutant alleles of RPT5a displayed 50% pollen lethality, indicati…	2.03534	1.5347e-94	UP
AT3G62260	NA	NA	2.03168	4.56508e-21	UP
AT3G46660	UGT76E12	NA	2.02845	2.58372e-09	UP
AT3G14440	ATNCED3	Encodes 9-<i>cis</i>-epoxycarotenoid dioxygenase, a key enzyme in the biosynthesis of abscisic acid. Regulated in response to drought and salinity. Expressed in roots, flowers and seeds. Localized to the chloroplast stroma and thylakoid membrane.	2.02841	3.69118e-23	UP
AT4G36110	SAUR9	NA	2.02712	1.18752e-22	UP
AT5G17990	pat1	Encodes the tryptophan biosynthetic enzyme phosphoribosylanthranilate transferase (PAT1, called trpD in bacteria). Converts anthranilate and phosphoribosylpyrophosphate into phosphoribosylanthranilate and inorganic pyrophosphate.	2.02294	2.03784e-114	UP
AT3G03610	NA	NA	2.02262	2.07395e-57	UP
AT4G05497	NA	NA	2.02161	0.00185956	UP
AT3G48630	NA	NA	2.02148	0.00221351	UP
AT5G44390	AtBBE25	NA	2.02043	5.05964e-24	UP
AT2G01818	NA	NA	2.01999	0.000134476	UP
AT1G61120	GES	Encodes a geranyllinalool synthase that produces a precursor to TMTT, a volatile plant defense C16-homoterpene. GES transcript levels rise in response to alamethicin, a fungal peptide mixture that damages membranes. This transcriptional response is blocked in JA biosynthetic and JA signaling mutants, but GES transcript levels still rise in response to alamethicin in mutants with salicylic acid an…	2.0176	2.60625e-20	UP
AT4G29230	anac075	NA	2.01651	7.3612e-11	UP
AT4G25000	AMY1	Predicted to be secreted protein based on signalP prediction. Involved in starch mobilization. Mutants are defective in alpha-amylase activity. (Note: AMY1 has been found in the literature to be referred to as AMY3, which is not to be confused with AMY3/At1g69830).	2.01615	1.98892e-26	UP
AT3G13790	ATBFRUCT1	Encodes a protein with invertase activity.	2.01303	1.24245e-66	UP
AT1G02930	ATGST1	Encodes glutathione transferase belonging to the phi class of GSTs. Naming convention according to Wagner et al. (2002).	2.0128	3.60029e-30	UP
AT1G80300	ATNTT1	NA	2.01161	6.37076e-67	UP
AT1G36622	NA	NA	2.01161	1.18474e-05	UP
AT5G11520	ASP3	Encodes the chloroplastic isozyme of aspartate aminotransferase. Involved in aspartate biosynthesis and nitrogen metabolism. mRNA is expressed in senescing leaves.	2.01107	2.33373e-141	UP
AT1G61260	NA	NA	2.00967	6.23568e-25	UP
AT5G05730	AMT1	ASA1 encodes the alpha subunit of anthranilate synthase, which catalyzes the rate-limiting step of tryptophan synthesis. ASA1 is induced by ethylene, and forms a link between ethylene signalling and auxin synthesis in roots.	2.00965	2.49869e-82	UP
AT1G03055	AtD27	NA	2.00704	1.46032e-13	UP
AT2G16720	ATMYB7	Encodes a member of MYB3R- and R2R3- type MYB- encoding genes	2.007	5.21651e-19	UP
AT2G20470	NA	NA	2.00683	5.31818e-05	UP
AT2G29070	NA	NA	2.00658	1.64115e-41	UP
AT4G36640	NA	NA	2.00633	8.285e-51	UP
AT1G04980	ATPDI10	Encodes a protein disulfide isomerase-like (PDIL) protein, a member of a multigene family within the thioredoxin (TRX) superfamily. Transcript levels for this gene are up-regulated in response to three different chemical inducers of ER stress (dithiothreitol, beta-mercaptoethanol, and tunicamycin). AtIRE1-2 does not appear to be required for this response, but the atbzip60 mutant has a diminished…	2.00496	2.29011e-31	UP
AT3G52430	ATPAD4	Encodes a lipase-like gene that is important for salicylic acid signaling and function in resistance (R) gene-mediated and basal plant disease resistance. PAD4 can interact directly with EDS1, another disease resistance signaling protein. Expressed at elevated level in response to green peach aphid (GPA) feeding, and modulates the GPA feeding-induced leaf senescence through a mechanism that doesn…	2.00409	3.37122e-39	UP
AT5G06740	LecRK-S.5	NA	2.00402	0.000213909	UP
AT5G43910	NA	NA	2.00381	1.47825e-31	UP
AT3G61960	NA	NA	2.00267	4.3467e-121	UP
AT1G33110	NA	NA	2.00117	5.34438e-77	UP
AT5G57910	NA	NA	1.99895	3.95388e-33	UP
AT3G03060	NA	NA	1.99871	3.06334e-22	UP
AT5G57550	XTH25	xyloglucan endotransglycosylase-related protein (XTR3)	1.99764	1.85519e-41	UP
AT4G04960	LecRK-VII.1	NA	1.99678	2.61857e-50	UP
AT4G17900	NA	NA	1.99474	5.08593e-34	UP
AT5G40720	NA	NA	1.99395	4.41022e-88	UP
AT5G62130	NA	NA	1.99358	4.24924e-17	UP
AT5G56630	PFK7	NA	1.9932	3.21616e-140	UP
AT2G33380	AtCLO3	Encodes a calcium binding protein whose mRNA is induced upon treatment with NaCl, ABA and in response to dessication. mRNA expression under drought conditions is apparent particularly in leaves and flowers. Isoform of caleosin with a role as a peroxygenase involved in oxylipin metabolism during biotic and abiotic stress.	1.99243	3.96275e-05	UP
AT3G04720	AtPR4	Encodes a protein similar to the antifungal chitin-binding protein hevein from rubber tree latex. mRNA levels increase in response to ethylene and turnip crinkle virus infection.	1.99145	2.86055e-44	UP
AT2G36710	NA	NA	1.99079	0.00764168	UP
AT1G50420	SCL-3	Encodes a scarecrow-like protein (SCL3) Putative transcription factors interacting with the gene product of VHA-B1 (vacuolar ATPase subunit B1; as shown through yeast two-hybrid assay).	1.98864	1.86351e-40	UP
AT4G37370	CYP81D8	member of CYP81D	1.98848	3.27262e-20	UP
AT4G31800	ATWRKY18	Pathogen-induced transcription factor. Binds W-box sequences in vitro. Forms protein complexes with itself and with WRKY40 and WRKY60. Constitutive expression of WRKY18 enhanced resistance to P. syringae, but its coexpression with WRKY40 or WRKY60 made plants more susceptible to both P. syringae and B. cinerea. WRKY18, WRKY40, and WRKY60 have partially redundant roles in response to the hemibiotr…	1.98693	4.12611e-41	UP
AT1G48320	DHNAT1	NA	1.98162	6.76919e-42	UP
AT2G47130	AtSDR3	NA	1.97995	5.13746e-31	UP
AT1G56060	AthCYSTM3	NA	1.97893	3.29635e-11	UP
AT3G23510	NA	NA	1.97819	8.8154e-19	UP
AT1G15670	KFB01	NA	1.97666	1.74359e-42	UP
AT1G05710	NA	NA	1.97593	5.89744e-18	UP
AT1G60420	AtNRX1	Reduce transmission through pollen.	1.9748	2.13483e-79	UP
AT1G76960	NA	NA	1.97242	3.08129e-26	UP
AT4G05020	NDB2	NA	1.97208	3.04377e-28	UP
AT5G55560	NA	NA	1.97202	5.07448e-22	UP
AT4G30490	NA	NA	1.97127	3.78639e-50	UP
AT1G32870	ANAC013	NA	1.97115	5.02289e-57	UP
AT3G27330	NA	NA	1.97012	9.03175e-15	UP
AT4G34180	CYCLASE1	NA	1.96992	1.3168e-72	UP
AT5G61250	AtGUS1	Belongs to the plant glycoside hydrolase family 79. Encodes a protein with several posttranslational modification sites including O-&#946;-GlcNAc attachment sites and serine-, threonine- and tyrosine-phosphorylation sites, suggesting that this protein is extensively modified posttranslationally. The protein is predicted (WoLF PSORT program) to be secreted.	1.96883	3.16696e-28	UP
AT3G09280	NA	NA	1.96877	0.010831	UP
AT4G04490	CRK36	Encodes a cysteine-rich receptor-like protein kinase.	1.96859	1.00208e-27	UP
AT4G21610	LOL2	Contains the same novel zinc finger motif with LSD1, a negative regulator of cell death and defense response. Due to differential splicing, it encodes two different proteins, one of which contains an additional, putative DNA binding motif. Northern analysis demonstrated that LOL2 transcripts containing the additional DNA binding motif are predominantly upregulated after treatment with both virule…	1.96802	9.48137e-25	UP
AT1G05340	AthCYSTM1	NA	1.96708	5.47005e-11	UP
AT5G52450	NA	NA	1.96669	5.66728e-59	UP
AT2G23150	ATNRAMP3	Encodes a member of the Nramp2 metal transporter family; like its homolog Atnramp4, localized in vacuolar membrane. Seedlings of double mutant, atnramp3-1 atnramp4-1, were arrested at early germination.	1.96658	2.37463e-24	UP
AT4G26220	CCoAOMT7	NA	1.96479	0.00758823	UP
AT5G09420	AtmtOM64	NA	1.96479	4.50263e-23	UP
AT4G09770	NA	NA	1.96366	4.84235e-14	UP
AT4G23610	NA	NA	1.96365	2.46771e-14	UP
AT1G33560	ADR1	Encodes a NBS-LRR disease resistance protein that possesses N-terminal kinase subdomains. Activation tagged mutant of ADR1 showed elevated levels of SA and reactive oxygen species in addition to number of defense gene transcripts. Exhibits resistance to number of microbial pathogens.	1.96285	2.41562e-60	UP
AT1G09740	NA	NA	1.96085	2.2951e-62	UP
AT2G15310	ARFB1A	A member of ARF GTPase family. A thaliana has 21 members of this family, known to be essential for vesicle coating and uncoating and functions in GTP-binding. Gene encoding ADP-ribosylation factor and similar to ADP-ribosylation factor (GI:861205) (Chlamydomonas reinhardtii), other ARFs and ARF-like proteins.	1.96078	1.32535e-21	UP
AT2G36090	NA	NA	1.95831	5.32146e-08	UP
AT4G02380	AtLEA5	Encodes AtLEA5 (late embryogenesis abundant like protein). Also known as SENESCENCE-ASSOCIATED GENE 21 (SAG21). Has a role on oxidative stress tolerance. mRNA levels are elevated in response to various stresses.	1.95753	1.18071e-08	UP
AT4G04125	NA	NA	1.95587	4.16669e-17	UP
AT4G03960	AtPFA-DSP4	NA	1.9558	3.12614e-28	UP
AT2G03450	ATPAP9	NA	1.95251	1.78198e-22	UP
AT1G16090	WAKL7	WAK-like kinase	1.95117	9.84884e-27	UP
AT3G50480	HR4	Homolog of RPW8	1.95113	2.81431e-42	UP
AT3G14470	NA	NA	1.95069	1.28795e-32	UP
AT2G40095	NA	NA	1.94919	1.0737e-17	UP
AT2G42890	AML2	A member of mei2-like gene family, predominantly plant-based family of genes encoding RNA binding proteins with characteristic presence of a highly conserved RNA binding motif first described in the mei2 gene of the fission yeast S. pombe. In silico analyses reveal nine mei2 -like genes in A. thaliana. They were grouped into four distinct clades, based on overall sequence similarity and subfamily…	1.94869	1.25508e-51	UP
AT2G08435	NA	NA	1.94811	0.00538345	UP
AT3G58540	NA	NA	1.94784	0.0237241	UP
AT4G39320	NA	NA	1.94781	5.56714e-05	UP
AT5G56350	NA	NA	1.9475	1.01593e-75	UP
AT4G38830	CRK26	Encodes a cysteine-rich receptor-like protein kinase.	1.94636	9.45423e-05	UP
AT4G31230	NA	NA	1.94509	1.26264e-09	UP
AT5G45110	ATNPR3	Encodes a paralog of NPR1. Involved in negative regulation of defense responses against bacterial and oomycete pathogens. npr3 mutants has elevated level of PR1 expression. Interacts with TGA2, TGA3, TGA5 and TGA6 in yeast two hybrid assays.	1.94505	1.7897e-40	UP
AT3G19450	ATCAD4	Encodes a catalytically active cinnamyl alcohol dehydrogenase which uses p-coumaryl aldehyde as a preferred substrate. It can also use caffeyl, coniferyl and d-hydroxyconiferyl aldehydes as substrates.	1.94403	1.59623e-89	UP
AT2G33080	AtRLP28	NA	1.94282	1.09459e-09	UP
AT4G17670	NA	NA	1.9427	7.39949e-32	UP
AT5G64100	NA	NA	1.94082	0.00445685	UP
AT1G06520	ATGPAT1	Encodes a membrane associated mitochondrial localized protein with glycerol-3-phosphate acyltransferase activity.Expressed in flower buds and siliques. Homozygous mutant plants are male sterile and have abnormal glycerolipid levels.	1.94059	5.13866e-05	UP
AT4G19460	NA	NA	1.94047	0.000382959	UP
AT1G18300	atnudt4	NA	1.93841	2.58281e-06	UP
AT1G32170	XTH30	xyloglucan endotransglycosylase-related protein (XTR4)	1.93636	1.80253e-22	UP
AT3G09010	NA	NA	1.93557	7.88518e-27	UP
AT2G24180	CYP71B6	cytochrome P450 monooxygenase	1.93514	1.4658e-59	UP
AT3G59700	ATHLECRK	member of Receptor kinase-like protein family	1.93465	1.92732e-30	UP
AT5G25910	AtRLP52	putative disease resistance protein induced by chitin oligomers.	1.93388	9.22358e-17	UP
AT3G55890	NA	NA	1.93266	1.5276e-17	UP
AT1G57590	AtPAE2	NA	1.93192	1.51089e-10	UP
AT4G30450	NA	NA	1.92924	6.44268e-24	UP
AT4G27745	NA	NA	1.92854	5.20048e-41	UP
AT5G07380	NA	NA	1.92797	0.00275625	UP
AT1G64950	CYP89A5	member of CYP89A	1.92525	1.76146e-144	UP
AT3G23200	CASPL5B3	NA	1.92296	3.56666e-18	UP
AT1G77510	ATPDI6	Encodes a protein disulfide isomerase-like (PDIL) protein, a member of a multigene family within the thioredoxin (TRX) superfamily. Transcript levels for this gene are up-regulated in response to three different chemical inducers of ER stress (dithiothreitol, beta-mercaptoethanol, and tunicamycin). AtIRE1-2 does not appear to be required for this response, but the atbzip60 mutant has a diminished…	1.92281	7.55832e-39	UP
AT2G40340	AtERF48	Encodes a member of the DREB subfamily A-2 of ERF/AP2 transcription factor family. The protein contains one AP2 domain. There are eight members in this subfamily including DREB2A AND DREB2B that are involved in response to drought.	1.92201	1.76682e-26	UP
AT5G53830	MVQ3	NA	1.91964	6.34429e-27	UP
AT1G16900	EBS3	curculin-like (mannose-binding) lectin family protein, very low similarity to Ser Thr protein kinase GI:2598067 from (Zea mays); contains Pfam lectin (probable mannose binding) domain PF01453 but not the protein kinase domain of the Z. mays protein	1.91948	2.71613e-65	UP
AT1G22110	NA	NA	1.9121	1.80923e-05	UP
AT2G18690	NA	NA	1.91058	4.59632e-07	UP
AT4G23150	CRK7	Encodes a cysteine-rich receptor-like protein kinase.	1.91022	3.38546e-07	UP
AT5G67245	NA	NA	1.90957	6.39828e-06	UP
AT5G06320	NHL3	encodes a protein whose sequence is similar to tobacco hairpin-induced gene (HIN1) and Arabidopsis non-race specific disease resistance gene (NDR1). Expression of this gene is induced by cucumber mosaic virus, spermine and Pseudomonas syringae pv. tomato DC3000. The gene product is localized to the plasma membrane.	1.90833	1.21276e-23	UP
AT5G10520	RBK1	NA	1.90716	2.93846e-08	UP
AT5G62020	AT-HSFB2A	member of Heat Stress Transcription Factor (Hsf) family	1.90368	2.47677e-27	UP
AT1G52200	NA	NA	1.9034	1.50663e-37	UP
AT5G59780	ATMYB59	Encodes a putative transcription factor (MYB59).	1.90298	1.5103e-24	UP
AT4G23450	AIRP1	NA	1.90204	5.91253e-13	UP
AT2G18000	TAF14	NA	1.90178	5.76182e-10	UP
AT4G36450	ATMPK14	member of MAP Kinase	1.90123	0.000405857	UP
AT3G06860	ATMFP2	Encodes a multifunctional protein. Involved in peroxisomal fatty acid beta oxidation. Loss-of-function mutant lacks hydroxyacyl-CoA dehydrogenase activity and have reduced levels of long-chain enoyl-CoA hydratase activity. The mutant has fewer but larger peroxisomes.	1.90013	2.5296e-148	UP
AT5G14000	anac084	NA	1.89684	0.0081803	UP
AT2G17710	NA	NA	1.89541	4.26191e-28	UP
AT1G51800	IOS1	NA	1.89528	2.03645e-33	UP
AT1G29860	ATWRKY71	member of WRKY Transcription Factor; Group II-c	1.89469	0.000118687	UP
AT1G61420	NA	NA	1.89416	6.31797e-22	UP
AT1G26380	AtBBE3	NA	1.89376	5.68619e-16	UP
AT3G28570	NA	NA	1.89374	0.0235573	UP
AT5G54840	ATSGP1	Monomeric G protein. Expressed in the root quiescent center, flowers, and leaf guard cells and hydathodes.	1.89335	2.54606e-27	UP
AT5G25770	NA	NA	1.89191	1.00371e-17	UP
AT4G37310	CYP81H1	member of CYP81H	1.89018	2.49059e-67	UP
AT1G01010	ANAC001	NA	1.88963	4.60864e-43	UP
AT2G24850	TAT	Encodes a tyrosine aminotransferase that is responsive to treatment with jasmonic acid.	1.88953	1.01262e-23	UP
AT1G52315	ISTL9	NA	1.88876	1.79054e-07	UP
AT4G02050	STP7	NA	1.88841	3.54079e-66	UP
AT2G46790	APRR9	Pseudo-response regulator PRR9. Involved in clock function. PRR7 and PRR9 are partially redundant essential components of a temperature-sensitive circadian system. CCA1 and LHY had a positive effect on PRR9. Interact with TOC1 in a yeast two-hybrid assay. Acts as transcriptional repressor of CCA1 and LHY.	1.88613	6.61912e-20	UP
AT3G61990	OMTF3	NA	1.88579	1.20251e-10	UP
AT4G33550	NA	NA	1.88527	5.85672e-11	UP
AT2G17720	P4H5	NA	1.88475	4.28636e-42	UP
AT1G02360	NA	NA	1.88463	2.20035e-21	UP
AT3G11402	NA	NA	1.8842	6.82273e-25	UP
AT2G04400	IGPS	NA	1.88042	3.94406e-86	UP
AT1G72220	NA	NA	1.87823	0.00385558	UP
AT4G01010	ATCNGC13	member of Cyclic nucleotide gated channel family	1.87801	1.33158e-21	UP
AT4G28570	NA	NA	1.87799	1.88435e-63	UP
AT1G25277	NA	NA	1.87796	1.96839e-07	UP
AT5G02490	AtHsp70-2	NA	1.87787	3.87998e-07	UP
AT1G70300	KUP6	potassium transporter	1.87657	2.7797e-38	UP
AT1G07430	AIP1	NA	1.87461	4.56031e-16	UP
AT1G12290	NA	NA	1.87349	9.21093e-21	UP
AT1G68360	GIS3	NA	1.87244	0.00865186	UP
AT1G21550	NA	NA	1.87138	5.33058e-25	UP
AT2G44290	NA	NA	1.87034	8.66022e-22	UP
AT4G14020	NA	NA	1.86992	1.23921e-77	UP
AT5G48485	DIR1	encodes a putative apoplastic lipid transfer protein that is involved in systemic acquired resistance. Mutants in this gene exhibit wild-type local resistance to avirulent and virulent Pseudomonas syringae, but pathogenesis-related gene expression is abolished in uninoculated distant leaves and fail to develop SAR to virulent Pseudomonas or Peronospora parasitica.	1.86823	5.6228e-11	UP
AT5G42050	NRP	NA	1.86717	1.84427e-35	UP
AT2G47270	UPB1	NA	1.86708	7.5056e-07	UP
AT1G05300	ZIP5	member of Fe(II) transporter isolog family	1.86586	7.62355e-27	UP
AT3G48180	NA	NA	1.86574	0.00412635	UP
AT5G51070	CLPD	ATP-dependent Clp protease regulatory subunit	1.86269	7.06791e-66	UP
AT1G27300	NA	NA	1.86196	9.26446e-32	UP
AT5G08380	AGAL1	NA	1.8605	1.81268e-58	UP
AT1G51670	HTT5	NA	1.86038	0.000540862	UP
AT1G61490	NA	NA	1.86007	9.04853e-22	UP
AT4G04510	CRK38	Encodes a cysteine-rich receptor-like protein kinase.	1.8582	4.4638e-15	UP
AT4G10040	CYTC-2	Encodes cytochrome c. Promoter directs preferential expression in vascular tissues of cotyledons, leaves, roots, and hypocotyls, and in anthers.	1.85746	6.95891e-34	UP
AT5G45800	MEE62	NA	1.85713	5.28032e-47	UP
AT1G61560	ATMLO6	A member of a large family of seven-transmembrane domain proteins specific to plants, homologs of the barley mildew resistance locus o (MLO) protein. The Arabidopsis genome contains 15 genes encoding MLO proteins, with localization in plasma membrane. Phylogenetic analysis revealed four clades of closely-related AtMLO genes. ATMLO6 belongs to the clade IV, with AtMLO2, AtMLO3 and AtMLO12. The gen…	1.85691	4.40488e-13	UP
AT1G15310	ATHSRP54A	54 kDa protein subunit of SRP that interacts with the signal peptide of secreted proteins	1.85589	2.58818e-13	UP
AT2G41220	GLU2	Encodes a gene whose sequence is similar to ferredoxin dependent glutamate synthase (Fd-GOGAT). Expression is most abundant in root.	1.85536	8.50082e-94	UP
AT3G22060	NA	contains Pfam profile: PF01657 Domain of unknown function that is usually associated with protein kinase domain Pfam:PF00069, however this protein does not have the protein kinase domain	1.85523	3.49346e-34	UP
AT5G20000	NA	NA	1.85411	2.3312e-73	UP
AT1G48605	ATHAL3B	Encodes a protein similar to yeast HAL3, which regulates the cell cycle and tolerance to salt stress through inhibition of the PPZ1 type-1 protein phosphatase. AtHAL3b mRNA levels are induced by salt stress. HAL3B presumably encodes for phosphopantothenoylcysteine decarboxylase being involved in Coenzyme A biosynthesis as indicated by functional complementation of a double mutant hal3 aaBb.	1.85372	2.58586e-08	UP
AT5G25120	CYP71B11	putative cytochrome P450	1.85371	1.07342e-27	UP
AT1G10340	NA	NA	1.85352	2.87824e-20	UP
AT5G41830	NA	NA	1.85091	0.00326226	UP
AT5G37490	NA	NA	1.85007	0.00757055	UP
AT1G30370	DLAH	NA	1.84858	1.3281e-05	UP
AT3G48390	MRF4	NA	1.84778	7.5179e-07	UP
AT1G13990	NA	NA	1.84729	5.31021e-65	UP
AT2G44380	NA	NA	1.84696	4.5961e-13	UP
AT3G55700	NA	NA	1.84601	1.75882e-08	UP
AT3G02520	GF14	Encodes GF14 &#957;, a 14-3-3 protein isoform (14-3-3&#957;).	1.8447	2.22776e-70	UP
AT5G01610	NA	NA	1.84409	4.45315e-17	UP
AT3G54150	EFD	NA	1.84351	4.41522e-20	UP
AT3G21240	4CL2	encodes an isoform of 4-coumarate:CoA ligase (4CL), which is involved in the last step of the general phenylpropanoid pathway. The catalytic efficiency was in the following (descending) order: p-coumaric acid, caffeic acid, ferulic acid, 5-OH-ferulic acid and cinnamic acid. At4CL2 was unable to use sinapic acid as substrate.	1.84341	2.80188e-27	UP
AT1G71530	NA	NA	1.84255	0.0120969	UP
AT5G26860	LON1	Encodes a member of the Lon protease-like proteins (Lon1/At5g26860, Lon2/At5g47040, Lon3/At3g05780, Lon4/At3g05790). Lon is a multifunctional ATP-dependent protease which exists in bacteria, archaea and within organelles in eukaryotic cells. Lon proteases are responsible for the degradation of abnormal, damaged and unstable proteins.	1.84136	5.35009e-69	UP
AT5G55970	NA	NA	1.84066	5.7807e-24	UP
AT5G60280	LecRK-I.8	NA	1.84034	1.0304e-44	UP
AT5G60440	AGL62	AGL62 encodes a Type I MADS domain protein that likely functions as a transcription factor. It is expressed AGL62 is expressed exclusively in the endosperm. AGL62 supresses suppresses cellularization during the syncytial phase of endosperm development.	1.83972	1.15703e-05	UP
AT5G08790	anac081	induced by wounding, belongs to a large family of putative transcriptional activators with NAC domain.	1.83882	6.38837e-34	UP
AT2G31060	EMB2785	NA	1.83747	3.80109e-59	UP
AT3G60970	NA	NA	1.83695	6.87282e-07	UP
AT5G27600	ATLACS7	Encode peroxisomal long-chain acyl-CoA synthetase. Activates fatty acids for further metabolism. Interacts with PEX5.	1.8356	4.71021e-68	UP
AT1G17860	AtKTI5	NA	1.83433	3.05923e-22	UP
AT4G16260	NA	NA	1.83404	4.40824e-05	UP
AT1G30620	HSR8	encodes a type-II membrane protein that catalyzes 4-epimerization of UDP-D-Xylose to UDP-L-Arabinose in vitro, the nucleotide sugar used by glycosyltransferases in the arabinosylation of cell wall polysaccharides and wall-resident proteoglycans.	1.83192	5.38834e-32	UP
AT4G25900	NA	NA	1.8319	1.24804e-39	UP
AT2G02350	AtPP2-B9	encodes a protein containing an F-box domain and physically interacts with SCF subunit SKP1/ASK1. The protein also exhibits similarity in sequence to phloem protein 2 (PP2) from cucumber.	1.83187	1.05394e-13	UP
AT4G27070	TSB2	Tryptophan synthase beta. Expressed at low levels in all tissues.	1.83089	2.73582e-53	UP
AT1G26200	NA	NA	1.8308	1.12399e-11	UP
AT2G33020	AtRLP24	NA	1.8277	1.79403e-08	UP
AT4G13510	AMT1;1	Encodes a plasma membrane localized ammonium transporter. Contains a cytosolic trans-activation domain essential for ammonium uptake.	1.82759	1.03363e-18	UP
AT2G04515	NA	NA	1.82526	7.24796e-07	UP
AT5G20910	AIP2	NA	1.82511	6.1219e-56	UP
AT1G51820	SIF4	NA	1.82459	4.83189e-19	UP
AT1G77500	NA	NA	1.82372	9.20677e-28	UP
AT1G74360	GRACE	NA	1.82343	8.08814e-22	UP
AT4G33467	NA	NA	1.82201	3.92451e-11	UP
AT2G38490	CIPK22	member of AtCIPKs	1.8219	0.000141569	UP
AT5G60250	NA	NA	1.82167	0.000496893	UP
AT5G61260	NA	NA	1.82123	5.55708e-08	UP
AT5G56180	ARP8	encodes a protein whose sequence is similar to actin-related proteins (ARPs) in other organisms. Member of nuclear ARP family of genes.	1.82083	5.36957e-62	UP
AT1G03340	NA	NA	1.82026	1.41548e-15	UP
AT4G01700	NA	NA	1.81985	1.77003e-34	UP
AT5G33290	XGD1	Acts as a xylogalacturonan xylosyltransferase within the XGA biosynthesis pathway. Involved in pectin biosynthesis.	1.81967	3.57343e-79	UP
AT3G51350	NA	NA	1.8179	1.41763e-09	UP
AT1G03820	NA	NA	1.81717	4.25393e-13	UP
AT3G49320	NA	NA	1.81598	2.17703e-09	UP
AT5G59700	NA	NA	1.81423	1.00608e-13	UP
AT4G30190	AHA2	belongs to the P-type ATPase superfamily of cation-transporting ATPases, pumps protons out of the cell, generating a proton gradient that drives the active transport of nutrients by proton symport. has two autoinhibitory regions within the C-terminal dom	1.81198	6.23757e-80	UP
AT4G13540	NA	NA	1.81067	0.000735914	UP
AT3G13380	BRL3	Similar to BRI, brassinosteroid receptor protein.	1.80844	8.211e-26	UP
AT2G32190	AthCYSTM4	NA	1.80711	9.59548e-13	UP
AT4G18250	NA	NA	1.80483	5.45384e-21	UP
AT3G58380	NA	NA	1.80422	0.0170969	UP
AT5G26340	ATSTP13	Encodes a protein with high affinity, hexose-specific/H+ symporter activity. The activity of the transporter appears to be negatively regulated by phosphorylation. Importantly, microarray analysis, as well as the study of the expression of this gene in mutants involved in programmed cell death (PCD) demonstrated a tight correlation between this gene's expression and PCD.	1.80284	6.74312e-44	UP
AT3G57010	NA	NA	1.80273	4.01197e-05	UP
AT3G28340	GATL10	Encodes a protein with putative galacturonosyltransferase activity.	1.80189	8.43702e-15	UP
AT1G70810	CAR7	NA	1.80123	4.40166e-70	UP
AT3G13330	PA200	Encodes a protein that interacts with the 26S proteasome. Mutants are phenotypically indistinguishable from wild type plants under a variety of growth conditions. Protein levels increase upon exposure of seedlings to MG132, a specific, potent, reversible, and cell-permeable proteasome inhibitor.	1.79823	1.51707e-67	UP
AT3G44720	ADT4	Encodes a plastid-localized arogenate dehydratase involved in phenylalanine biosynthesis. Not less than six genes encoding ADT were identi&#64257;ed in the Arabidopsis genome: ADT1 [At1g11790]; ADT2 [At3g07630]; ADT3 [At2g27820]; ADT4 [At3g44720]; ADT5 [At5g22630]; and ADT6 [At1g08250].	1.79765	2.33937e-30	UP
AT5G64080	AtXYP1	NA	1.79699	5.8084e-11	UP
AT3G49570	LSU3	NA	1.79477	5.22667e-07	UP
AT1G71890	ATSUC5	Encodes a sucrose transporter that is expressed in the endosperm. Mutants have delayed accumulation of fatty acids and embryo maturation.	1.79336	0.000845261	UP
AT3G05390	NA	NA	1.79304	1.31593e-05	UP
AT5G48390	AtSPO22	Defective in meiotic chromosome segregation. It is involved in crossover formation and involved in both male and female meiosis.	1.79253	0.0382472	UP
AT1G69570	CDF5	NA	1.79175	3.96077e-09	UP
AT2G43150	NA	NA	1.79155	8.85323e-55	UP
AT3G20250	APUM5	Encodes a member of the Arabidopsis Pumilio (APUM) proteins containing PUF domain (eight repeats of approximately 36 amino acids each). PUF proteins regulate both mRNA stability and translation through sequence-specific binding to the 3' UTR of target mRNA transcripts.	1.79042	1.68118e-86	UP
AT1G24145	NA	NA	1.7903	1.61703e-06	UP
AT1G65500	STMP6	NA	1.78878	3.64176e-19	UP
AT1G79270	ECT8	NA	1.78818	1.80311e-49	UP
AT5G07830	AtGUS2	Belongs to the plant glycoside hydrolase family 79. Encodes a protein with several posttranslational modification sites including O-&#946;-GlcNAc attachment sites and serine-, threonine- and tyrosine-phosphorylation sites, suggesting that this protein is extensively modified posttranslationally. The protein is predicted (WoLF PSORT program) to be membrane-associated.	1.78736	6.3047e-59	UP
AT3G14710	NA	NA	1.78712	0.0290324	UP
AT3G23560	ALF5	Member of the multidrug and toxic compound extrusion (MATE) family, protects roots from inhibitory compounds.	1.78667	5.36167e-45	UP
AT3G17180	scpl33	NA	1.78603	0.0237603	UP
AT2G39350	ABCG1	NA	1.78515	8.35257e-13	UP
AT1G21750	ATPDI5	Encodes a protein disulfide isomerase-like (PDIL) protein, a member of a multigene family within the thioredoxin (TRX) superfamily; isoform contains non-consensus GA donor splice site at intron 9. Transcript levels for this gene are up-regulated in response to three different chemical inducers of ER stress (dithiothreitol, beta-mercaptoethanol, and tunicamycin). Neither AtIRE1-2 nor AtbZIP60 appe…	1.78497	1.36209e-50	UP
AT3G22460	OASA2	Encodes a member of a family of genes with O-acetylserine(thiol)lyase activity.	1.78467	5.17234e-19	UP
AT5G53290	CRF3	encodes a member of the ERF (ethylene response factor) subfamily B-5 of ERF/AP2 transcription factor family. The protein contains one AP2 domain. There are 7 members in this subfamily.	1.78443	1.72277e-07	UP
AT4G24690	AtNBR1	NA	1.78424	4.64406e-122	UP
AT5G45000	NA	NA	1.78419	1.56255e-36	UP
AT3G09020	NA	NA	1.78395	2.50976e-29	UP
AT1G66580	RPL10C	NA	1.78344	3.72852e-63	UP
AT2G30490	ATC4H	Encodes a cinnamate-4-hydroxylase. Mutations in this gene impact phenylpropanoid metabolism, growth and development.	1.78252	1.90586e-79	UP
AT4G12290	CuAO	NA	1.78136	4.23376e-86	UP
AT5G24655	LSU4	NA	1.7806	1.52234e-14	UP
AT2G23810	TET8	Member of TETRASPANIN family	1.78048	5.12626e-19	UP
AT5G51640	TBL17	Encodes leaf-senescence-related protein. A member of the TBL (TRICHOME BIREFRINGENCE-LIKE) gene family containing a plant-specific DUF231 (domain of unknown function) domain. TBL gene family has 46 members, two of which (TBR/AT5G06700 and TBL3/AT5G01360) have been shown to be involved in the synthesis and deposition of secondary wall cellulose, presumably by influencing the esterification state o…	1.7785	5.13171e-59	UP
AT3G08690	ATUBC11	NA	1.77728	3.95175e-59	UP
AT3G15760	NA	NA	1.77587	6.22126e-31	UP
AT1G09400	NA	NA	1.77556	0.000918962	UP
AT1G20120	NA	NA	1.77505	0.00566607	UP
AT5G26170	ATWRKY50	member of WRKY Transcription Factor; Group II-c	1.77349	4.92681e-15	UP
AT1G07870	NA	NA	1.77295	2.72838e-37	UP
AT3G60450	NA	NA	1.77163	1.82979e-60	UP
AT4G18930	NA	NA	1.77022	8.54504e-63	UP
AT5G12880	NA	NA	1.76977	0.00495986	UP
AT1G04280	NA	NA	1.76971	5.03374e-25	UP
AT5G24230	NA	NA	1.76921	1.88632e-07	UP
AT5G46590	anac096	NA	1.76603	0.0122596	UP
AT3G14700	NA	NA	1.76586	1.69397e-05	UP
AT4G20860	AtBBE22	NA	1.76562	1.57812e-50	UP
AT1G60190	AtPUB19	NA	1.76365	1.29395e-15	UP
AT3G07700	abc1k7	NA	1.76107	6.42409e-98	UP
AT4G36220	CYP84A1	encodes ferulate 5-hydroxylase (F5H). Involved in lignin biosynthesis.	1.76018	1.21851e-71	UP
AT2G15760	NA	NA	1.75945	1.32104e-15	UP
AT1G01070	UMAMIT28	NA	1.75866	3.28653e-15	UP
AT5G25250	FLOT1	NA	1.75625	8.67018e-22	UP
AT4G18253	NA	NA	1.75438	1.10626e-21	UP
AT3G48310	CYP71A22	putative cytochrome P450	1.75278	1.63959e-53	UP
AT5G41400	NA	NA	1.75228	4.33772e-29	UP
AT2G02990	ATRNS1	member of the ribonuclease T2 family, responds to inorganic phosphate starvation, and inhibits production of anthocyanin. Also involved in wound-induced signaling independent of jasmonic acid.	1.75185	1.72134e-07	UP
AT1G08043	NA	NA	1.75173	0.0228419	UP
AT4G32650	ATKC1	Encodes KAT3, a member of the Shaker family of voltage-gated potassium channel subunits. Does not form functional potassium channel on its own. Involved in down-regulating AKT1 and KAT1 channel activity by forming heteromers with AKT1 or KAT1. The Shaker family K+ ion channels include five groups based on phylogenetic analysis (FEBS Letters (2007) 581: 2357): I (inwardly rectifying conductance): …	1.75092	3.10867e-15	UP
AT4G11280	ACS6	encodes a a member of the 1-aminocyclopropane-1-carboxylate (ACC) synthase (S-adenosyl-L-methionine methylthioadenosine-lyase, EC 4.4.1.14) gene family	1.75014	1.98657e-30	UP
AT4G19645	NA	NA	1.74747	2.29871e-09	UP
AT1G10417	NA	Encodes protein with unknown function whose expression is repressed by inoculation with Agrobacterium tumerifaciens.	1.74743	1.89716e-07	UP
AT2G28990	NA	NA	1.74601	0.0172339	UP
AT2G29500	NA	NA	1.74581	5.65305e-11	UP
AT5G61890	ERF114	encodes a member of the ERF (ethylene response factor) subfamily B-4 of ERF/AP2 transcription factor family. The protein contains one AP2 domain. There are 7 members in this subfamily.	1.74523	2.57978e-05	UP
AT2G28210	ACA2	NA	1.74499	1.20752e-14	UP
AT3G57020	NA	NA	1.74476	6.93921e-26	UP
AT5G61560	NA	NA	1.74453	5.06358e-38	UP
AT1G17830	NA	NA	1.74435	7.5469e-12	UP
AT5G42440	NA	NA	1.74168	3.12009e-39	UP
AT3G22160	JAV1	NA	1.73973	1.29844e-37	UP
AT5G53550	ATYSL3	NA	1.7394	2.15305e-41	UP
AT3G51000	NA	NA	1.73872	6.79502e-69	UP
AT5G24120	ATSIG5	Encodes a specialized sigma factor that functions in regulation of plastid genes and is responsible for the light-dependent transcription at the psbD LRP. Activation of SIG5 is dependent upon blue light and mediated by cryptochromes.	1.73841	6.17767e-17	UP
AT2G14560	LURP1	Encodes LURP1, a member of the LURP cluster (late upregulated in response to Hyaloperonospora parasitica) which exhibits a pronounced upregulation after recognition of the pathogenic oomycte H. parasitica. LURP1 is required for full basal defense to H. parasitica and resistance to this pathogen mediated by the R-proteins RPP4 and RPP5.	1.73751	4.01413e-79	UP
AT1G76070	NA	NA	1.73655	1.80326e-19	UP
AT2G01540	CAR10	NA	1.73648	1.19254e-34	UP
AT3G27210	NA	NA	1.73625	2.44197e-25	UP
AT1G09480	NA	similar to Eucalyptus gunnii alcohol dehydrogenase of unknown physiological function (GI:1143445), Vigna unguiculata (gi:1854445), NOT a cinnamyl-alcohol dehydrogenase	1.73504	1.02249e-07	UP
AT3G57540	AtREM4.1	NA	1.73503	8.72555e-12	UP
AT5G06860	ATPGIP1	Encodes a polygalacturonase inhibiting protein involved in defense response. PGIPs inhibit the function of cell wall pectin degrading enzymes such as those produced by fungal pathogens. PGIP1 is induced by fungal infection.	1.73443	5.8547e-27	UP
AT5G22290	anac089	NA	1.7344	1.19708e-28	UP
AT3G52930	AtFBA8	NA	1.7335	9.54821e-89	UP
AT2G21350	NA	NA	1.73263	1.15613e-09	UP
AT3G24500	ATMBF1C	One of three genes in A. thaliana encoding multiprotein bridging factor 1, a highly conserved transcriptional coactivator. May serve as a bridging factor between a bZIP factor and TBP. Its expression is specifically elevated in response to pathogen infection, salinity, drought, heat, hydrogen peroxide, and application of abscisic acid or salicylic acid. Constitutive expression enhances the tolera…	1.73224	4.8504e-22	UP
AT4G13920	AtRLP50	NA	1.73172	1.32087e-19	UP
AT1G64610	NA	NA	1.73126	2.03132e-25	UP
AT1G23120	NA	NA	1.7309	0.0276388	UP
AT4G08300	UMAMIT17	NA	1.73072	2.22709e-17	UP
AT1G77660	NA	NA	1.73022	4.71629e-28	UP
AT1G08920	ESL1	Encodes ESL1, a transporter for monosaccharides.	1.72797	5.95897e-17	UP
AT1G62540	FMO	belongs to the flavin-monooxygenase (FMO) family, encodes a glucosinolate S-oxygenase that catalyzes the conversion of methylthioalkyl glucosinolates to methylsulfinylalkyl glucosinolates	1.72777	1.11273e-15	UP
AT1G51140	AKS1	NA	1.72755	4.02018e-28	UP
AT1G75410	BLH3	BEL1-like homeodomain 3 (BLH3)	1.72729	7.21962e-90	UP
AT2G02230	AtPP2-B1	NA	1.72707	1.06967e-21	UP
AT2G02810	ATUTR1	Encodes a multitransmembrane hydrophobic protein that functions as transporter of UDP-galactose and UDP-glucose into the Golgi. Localized in the ER. Involved in the unfolded protein response, a mechanism that controls proper protein folding in the ER.	1.72679	4.3757e-35	UP
AT3G45620	NA	This gene is predicted to encode a protein with a DWD motif. It can bind to DDB1a in Y2H assays, and DDB1b in co-IP assays, and may be involved in the formation of a CUL4-based E3 ubiquitin ligase	1.72645	3.37331e-53	UP
AT1G52900	NA	NA	1.72579	0.00260953	UP
AT5G01542	NA	NA	1.72566	4.90059e-10	UP
AT5G66170	STR18	Encodes a thiosulfate sulfurtransferase/rhodanese.	1.72558	2.87408e-07	UP
AT4G22530	NA	NA	1.72454	3.36543e-41	UP
AT4G01610	AtcathB3	NA	1.72346	8.00027e-59	UP
AT2G41190	NA	NA	1.72237	8.90165e-13	UP
AT5G67520	APK4	Provides activated sulfate for the sulfation of secondary metabolites, including the glucosinolates. Redundant with APK3.	1.7222	8.91499e-11	UP
AT3G51895	AST12	Encodes a sulfate transporter.	1.72194	3.55474e-46	UP
AT5G66760	SDH1-1	One of two genes in Arabidopsis that encode a flavoprotein subunit of the mitochondrial succinate dehydrogenase complex.	1.72137	1.68185e-107	UP
AT5G38250	NA	NA	1.7211	1.39579e-17	UP
AT5G65600	LecRK-IX.2	NA	1.71877	6.7804e-10	UP
AT1G65480	FT	FT, together with LFY, promotes flowering and is antagonistic with its homologous gene, TERMINAL FLOWER1 (TFL1). FT is expressed in leaves and is induced by long day treatment. Either the FT mRNA or protein is translocated to the shoot apex where it induces its own expression. Recent data suggests that FT protein acts as a long-range signal. FT is a target of CO and acts upstream of SOC1.	1.71816	0.0007795	UP
AT3G10930	IDL7	NA	1.71815	0.00114698	UP
AT4G35110	PEARLI	NA	1.71813	7.29294e-40	UP
AT5G01850	NA	NA	1.71809	1.24182e-32	UP
AT5G24540	BGLU31	NA	1.71729	1.01325e-05	UP
AT2G38830	NA	NA	1.71691	1.20009e-07	UP
AT4G23200	CRK12	Encodes a cysteine-rich receptor-like protein kinase.	1.71426	1.83519e-28	UP
AT5G58650	PSY1	Encodes PSY1, an18-aa tyrosine-sulfated glycopeptide that promotes cellular proliferation and expansion. PSY1 is widely expressed in various tissues, including shoot apical meristem, and is highly up-regulated by wounding. Perception of PSY1 depends on At1g72300, a leucine-rich repeat receptor kinase (LRR-RK).	1.71375	1.12172e-13	UP
AT4G07165	NA	NA	1.71296	1.01434e-11	UP
AT2G28570	NA	NA	1.71219	3.1596e-11	UP
AT2G42280	AKS3	NA	1.71216	7.57329e-39	UP
AT5G47880	AteRF1-1	Encodes a eukaryotic release factor 1 homolog. Cosuppression of the gene's expression results affects cell elongation of the inflorescence stem, specifically the internodes, and radial cell division. Expression of the protein is primarily observed in the vascular system and in actively growing and elongating zones.	1.71129	4.69782e-74	UP
AT5G67140	NA	NA	1.71127	4.65946e-14	UP
AT1G04770	SDI2	NA	1.71067	5.28445e-24	UP
AT1G33720	CYP76C6	member of CYP76C	1.71045	3.47911e-30	UP
AT3G21780	UGT71B6	Encodes a protein with UDP-glucosyl transferase activity that was shown to preferentially glucosylates abscisic acid (ABA), and not its catabolites. Moreover, UGT71B6 was shown to have a strict preference for the naturally-occurring ABA enantiomer, (+)-ABA, and not its 'unnatural' relative, (-)-ABA. This is in contrast to the other identified UGT genes catalyzing the glucosylation of ABA which we…	1.70419	6.22252e-14	UP
AT3G21781	NA	NA	1.70419	6.22252e-14	UP
AT2G41780	NA	NA	1.70376	1.00071e-06	UP
AT1G69520	NA	NA	1.70176	1.54768e-16	UP
AT5G54140	ILL3	encodes a protein similar to IAA amino acid conjugate hydrolase	1.70037	3.76889e-28	UP
AT3G13900	ALA7	NA	1.69968	0.0353276	UP
AT3G43250	NA	NA	1.69836	0.00181937	UP
AT5G11230	UAFT2	NA	1.69644	3.29642e-10	UP
AT3G04670	ATWRKY39	member of WRKY Transcription Factor; Group II-d	1.69535	2.37206e-45	UP
AT5G02420	SMR3	NA	1.69393	0.0110634	UP
AT5G03020	NA	NA	1.69315	0.00042146	UP
AT4G14800	PBD2	Encodes 20S proteasome beta subunit PBD2 (PBD2).	1.69292	1.09928e-82	UP
AT1G22500	AtATL15	NA	1.68923	4.27663e-18	UP
AT5G20830	ASUS1	Encodes a protein with sucrose synthase activity (SUS1).	1.68879	2.53748e-50	UP
AT1G21520	NA	NA	1.68717	2.82543e-36	UP
AT3G02230	ATRGP1	reversibly glycosylated polypeptide possibly involved in plant cell wall synthesis	1.68682	5.45993e-57	UP
AT3G08990	NA	NA	1.68657	1.12699e-11	UP
AT1G67850	NA	NA	1.68582	4.12578e-24	UP
AT2G43140	bHLH129	NA	1.68312	6.31829e-07	UP
AT3G28890	AtRLP43	NA	1.68296	1.2322e-27	UP
AT5G46080	NA	NA	1.68186	4.77669e-11	UP
AT5G66400	ATDI8	Belongs to the dehydrin protein family, which contains highly conserved stretches of 7-17 residues that are repetitively scattered in their sequences, the K-, S-, Y- and lysine rich segments. ABA- and drought-induced glycine-rice dehydrin protein. The ABA-induced expression of RAB18 was reduced following ACC application, indicating that ethylene inhibits the ABA signaling pathway. RAB18 is also e…	1.68059	8.65555e-30	UP
AT5G06960	OBF5	Encodes a basic leucine zipper (B-ZIP) containing protein that interacts with NPR1 to promote expression of salicylic acid induced genes. Binds the ocs-element.	1.68006	3.423e-28	UP
AT1G79610	ATNHX6	NA	1.67823	6.83099e-49	UP
AT1G03290	NA	NA	1.678	2.69982e-67	UP
AT3G08870	LecRK-VI.1	NA	1.67635	2.18759e-50	UP
AT4G27852	NA	NA	1.67599	2.24919e-07	UP
AT5G40230	UMAMIT37	NA	1.67462	5.1523e-14	UP
AT3G13080	ABCC3	encodes an ATP-dependent MRP-like ABC transporter able to transport glutathione-conjugates as well as chlorophyll catabolites. The expression of this gene is upregulated by herbicide safeners such as benoxacor and fenclorim.	1.67182	2.89099e-21	UP
AT2G01650	PUX2	encodes a peripheral membrane protein that contains UBX domain and interacts with AtCDC48 in vitro and co-fractionates with membrane-associated but not soluble AtCDC48 in vivo.	1.67138	1.96071e-45	UP
AT5G01815	NA	NA	1.66987	4.50427e-06	UP
AT3G22400	ATLOX5	NA	1.66817	5.96079e-29	UP
AT1G30270	ATCIPK23	Arabidopsis thaliana CBL-interacting protein kinase 23. CIPK23 serves as a positive regulator of the potassium transporter AKT1 by directly phosphorylating AKT1. CIPK23 is activated by the binding of two calcineurin B-like proteins, CBL1 and CBL9.	1.6665	1.05699e-37	UP
AT2G33150	KAT2	Encodes an organellar (peroxisome, glyoxysome) 3-ketoacyl-CoA thiolase, involved in fatty acid b-oxidation during germination and subsequent seedling growth. Mutants have defects in glyoxysomal fatty acid beta-oxidation. EC2.3.1.16 thiolase.	1.66597	2.63757e-79	UP
AT4G38000	DOF4.7	NA	1.66593	0.0169093	UP
AT3G60190	ADL1E	At3g60190 encodes Arabidopsis dynamin-related protein 1E, DRP1E, also known as EDR3, ADL4 and ADL1E, which is 624 amino acid residues long, has a predicted mass of 69.8 kDa and a pI of 7.5. Dynamin-related protein 1E belongs to a plant-specific subclass of dynamin-related proteins (DRP1), consisting of five members in Arabidopsis (A, B, C, D, E). This class is characterized by having an N-termina…	1.66466	2.74064e-68	UP
AT1G80440	KFB20	NA	1.66362	1.40702e-38	UP
AT4G18580	NA	NA	1.66358	3.05882e-20	UP
AT5G39785	NA	NA	1.66168	2.97322e-18	UP
AT3G12580	ATHSP70	NA	1.66099	0.0013497	UP
AT4G17500	AtERF#100	Encodes a member of the ERF (ethylene response factor) subfamily B-3 of ERF/AP2 transcription factor family (ATERF-1). The protein contains one AP2 domain. There are 18 members in this subfamily including ATERF-1, ATERF-2, AND ATERF-5.	1.66076	3.08595e-45	UP
AT1G30900	BP80-3;3	NA	1.65974	1.59888e-16	UP
AT1G07890	APX1	Encodes a cytosolic ascorbate peroxidase APX1. Ascorbate peroxidases are enzymes that scavenge hydrogen peroxide in plant cells. Eight types of APX have been described for Arabidopsis: three cytosolic (APX1, APX2, APX6), two chloroplastic types (stromal sAPX, thylakoid tAPX), and three microsomal (APX3, APX4, APX5) isoforms. At least part of the induction of heat shock proteins during light stres…	1.65906	5.37481e-69	UP
AT3G60110	NA	NA	1.6588	9.2137e-23	UP
AT1G23800	ALDH2B	Encodes a mitochondrial aldehyde dehydrogenase; nuclear gene for mitochondrial product.	1.65844	2.14853e-17	UP
AT1G25150	NA	NA	1.65733	9.59383e-06	UP
AT4G34000	ABF3	Encodes an ABA-responsive element-binding protein with similarity to transcription factors that is expressed in response to stress and abscisic acid.	1.6559	1.90037e-27	UP
AT3G17000	UBC32	NA	1.65531	3.40501e-55	UP
AT3G21560	BRT1	Encodes a protein with sinapic acid:UDP-glucose glucosyltransferase activity. Mutants defective in this gene are hyper-fluorescent (which accumulate in their trichomes a compound that is likely to be 3',5'-dimethoxynaringenin chalcone or sinapoyltriacetic acid lactone, potential products of the concerted action of 4-coumarate CoA ligase and chalcone synthase on sinapic acid).	1.65491	1.70574e-49	UP
AT1G62810	CuAO1	NA	1.65401	6.87785e-38	UP
AT5G05110	NA	NA	1.65371	8.87606e-44	UP
AT5G54080	AtHGO	homogentisate 1,2-dioxygenase	1.65351	1.17972e-68	UP
AT2G02370	NA	NA	1.65274	4.5534e-39	UP
AT2G25297	NA	NA	1.65105	2.11323e-06	UP
AT3G12740	ALIS1	Physically interacts with ALA3, and is required for the phospholipid translocase activity of ALA3.	1.65074	4.86218e-35	UP
AT1G15110	AtPSS1	NA	1.65014	1.16267e-10	UP
AT5G65110	ACX2	Encodes an acyl-CoA oxidase presumably involved in long chain fatty acid biosynthesis.	1.64473	5.75448e-78	UP
AT5G10695	NA	NA	1.64435	2.0695e-17	UP
AT3G52400	ATSYP122	syntaxin protein, involved in the negative regulation of defense pathways such as programmed cell death, salicylic acid signalling pathway, jasmonic acid signalling pathway	1.64421	5.08693e-05	UP
AT3G11270	IRP4	NA	1.64412	5.29978e-36	UP
AT2G21180	NA	NA	1.64139	2.92891e-08	UP
AT4G27220	NA	NA	1.64092	0.00165879	UP
AT4G01910	NA	NA	1.64079	1.48954e-06	UP
AT5G06750	APD8	NA	1.64012	2.3061e-41	UP
AT5G40990	GLIP1	Component of plant resistance. Contains lipase signature motif and GDSL domain. Directly interferes with the fungal infection process by acting on fungal cell walls through its action as a antimicrobial compound. Critical component for both local and systemic resistance responses in the incompatible interaction with Alternaria brassicicola in the ethylene-dependent pathway.	1.63988	2.12297e-05	UP
AT4G27480	NA	NA	1.63914	3.48904e-16	UP
AT5G17380	NA	NA	1.63733	5.63474e-54	UP
AT5G03210	AtDIP2	NA	1.63615	1.0264e-11	UP
AT1G29300	UNE1	NA	1.63538	3.04394e-15	UP
AT4G23300	CRK22	Encodes a cysteine-rich receptor-like protein kinase.	1.6352	1.20827e-60	UP
AT3G08760	ATSIK	Encodes an osmotic stress-inducible kinase that functions as a negative regulator of osmotic stress signaling in plants.	1.63458	6.29179e-60	UP
AT2G21185	NA	NA	1.63399	3.33039e-25	UP
AT2G31390	FRK1	NA	1.63394	1.48426e-51	UP
AT3G52748	NA	NA	1.63186	7.28227e-09	UP
AT3G03341	NA	NA	1.63145	1.66277e-08	UP
AT1G19490	NA	NA	1.63089	9.34637e-06	UP
AT2G36580	NA	NA	1.63075	1.19651e-25	UP
AT4G33100	NA	NA	1.62982	2.54834e-12	UP
AT4G11230	RbohI	NA	1.62944	0.0119788	UP
AT2G35060	KUP11	potassium transporter	1.62876	6.2549e-84	UP
AT4G39270	NA	NA	1.62839	1.31406e-51	UP
AT4G18050	ABCB9	NA	1.62824	5.32777e-20	UP
AT2G33590	AtCRL1	NA	1.62752	2.45937e-61	UP
AT4G21470	ATFMN/FHY	Bifunctional enzyme that catalyzes hydrolysis of FMN to riboflavin, and phosphorylation of riboflavin to FMN.	1.62688	5.2354e-58	UP
AT4G11370	RHA1A	Encodes a putative RING-H2 finger protein RHA1a.	1.6261	1.70316e-17	UP
AT3G13810	AtIDD11	NA	1.62483	1.92888e-41	UP
AT5G40760	G6PD6	Encodes a cytosolic glucose-6-phosphate dehydrogenase that is insensitive to reduction by DTT and whose mRNA is expressed ubiquitously.	1.62323	1.36644e-52	UP
AT5G52890	NA	NA	1.62237	4.86567e-13	UP
AT3G52190	AtPHF1	Encodes a plant specific protein structurally related to the SEC12 proteins of the early secretory pathway. Mutation of PHF1 impairs Pi transport. Expression was detected in all tissues, and was induced by Pi starvation. Localized in endoplasmic reticulum (ER), and mutation of PHF1 resulted in ER retention and reduced accumulation of the plasma membrane PHT1;1 transporter.	1.6223	1.03823e-32	UP
AT4G16760	ACX1	Encodes a medium to long-chain acyl-CoA oxidase. Catalyzes the first step of fatty acid beta-oxidation. Involved in jasmonate biosynthesis. Gene expression is induced by wounding, drought stress, abscisic acid, and jasmonate.	1.62227	1.30052e-71	UP
AT2G04350	LACS8	NA	1.62104	2.88233e-82	UP
AT3G18950	NA	NA	1.6202	5.07588e-17	UP
AT4G17070	NA	NA	1.61956	1.17843e-35	UP
AT1G23140	CAR8	NA	1.61913	3.44382e-21	UP
AT1G71040	LPR2	Encodes LPR2. Function together with LPR1 (AT1G23010) and a P5-type ATPase (At5g23630/PDR2) in a common pathway that adjusts root meristem activity to Pi (inorganic phosphate) availability.	1.61829	5.23761e-69	UP
AT1G72700	NA	NA	1.61658	4.11416e-47	UP
AT4G26060	NA	NA	1.61499	1.59362e-42	UP
AT5G64905	PROPEP3	NA	1.61454	0.000144969	UP
AT5G19550	AAT2	Nitrogen metabolism. Major cytosolic isoenzyme controlling aspartate biosynthesis in the light.	1.61385	3.28611e-64	UP
AT4G04610	APR	Encodes a protein disulfide isomerase-like (PDIL) protein, a member of a multigene family within the thioredoxin (TRX) superfamily. This protein also belongs to the adenosine 5'-phosphosulfate reductase-like (APRL) group.	1.61278	2.67513e-93	UP
AT4G25835	NA	NA	1.61099	1.43569e-13	UP
AT1G67940	ABCI17	member of NAP subfamily	1.61097	4.59772e-36	UP
AT2G46270	GBF3	encodes a bZIP G-box binding protein whose expression is induced by ABA. It has been shown to bind to Adh that contains the G-box and is induced by cold and water deprivation. GBF3 has been shown to be expressed mostly in the root and dark-grown leaves. GBF3 can act as homodimers and as heterodimers with GFB1, GBF2 and GBF4. In addition, GBF3s DNA binding activity is enhanced by GIP1, GPRI1 and G…	1.60814	1.92212e-26	UP
AT1G74210	AtGDPD5	NA	1.60757	1.31554e-40	UP
AT1G71910	NA	NA	1.60755	1.65154e-13	UP
AT2G42790	CSY3	Encodes a peroxisomal citrate synthase that is expressed throughout seedling and shoot development.	1.60663	1.22441e-101	UP
AT5G39580	NA	NA	1.60631	0.00182022	UP
AT3G18260	RTNLB9	NA	1.60605	6.28175e-10	UP
AT1G73040	NA	NA	1.606	0.00366164	UP
AT5G07680	ANAC079	NA	1.60569	0.00424859	UP
AT2G36950	NA	NA	1.60568	3.89655e-24	UP
AT1G11540	NA	NA	1.60542	0.044312	UP
AT1G25520	NA	NA	1.60514	1.0627e-31	UP
AT3G44100	NA	NA	1.60492	1.39958e-70	UP
AT3G23630	ATIPT7	Encodes an isopentenyl transferase involved in cytokinin biosynthesis.	1.60491	0.0227962	UP
AT3G24503	ALDH1A	Arabidopsis thaliana aldehyde dehydrogenase AtALDH1a mRNA. a sinapaldehyde dehydrogenase catalyzes both the oxidation of coniferylaldehyde and sinapaldehyde forming ferulic acid and sinapic acid, respectively	1.60469	5.72614e-28	UP
AT3G06420	ATG8H	NA	1.60312	8.11015e-24	UP
AT3G18560	NA	NA	1.60305	5.22038e-11	UP
AT2G25450	GSL-OH	encodes a protein whose sequence is similar to ACC oxidase	1.60287	4.56124e-93	UP
AT4G38250	At4g38250	NA	1.6028	1.38488e-07	UP
AT1G33800	AtGXMT1	NA	1.602	1.7109e-07	UP
AT1G62320	NA	NA	1.60082	3.99101e-06	UP
AT4G32870	NA	NA	1.59999	2.49376e-22	UP
AT3G55270	ATMKP1	MAP kinase phosphatase (MKP1)	1.5981	3.77878e-56	UP
AT1G24140	AT3-MMP	NA	1.59761	3.96279e-11	UP
AT1G02230	ANAC004	NA	1.59731	7.3462e-07	UP
AT4G28490	HAE	member of Receptor kinase-like protein family	1.595	1.40415e-47	UP
AT4G14640	AtCML8	encodes a divergent member of calmodulin, which is an EF-hand family of Ca2+-binding proteins. This gene is expressed in leaves, flowers and siliques. The gene functionally complements yeast calmodulin 1 (CAM1). Also the protein does not form formed a complex with a basic amphiphilic helical peptide in the presence of Ca2+ in vitro. Authors suggest that this gene may represent a Ca2+-binding sens…	1.59494	1.33835e-05	UP
AT5G62820	CASPL4A2	NA	1.59445	4.96289e-05	UP
AT4G19040	EDR2	Encodes a PH and START domain-containing protein that mediates resistance to pathogenic fungi. Resistance requires salicylic acid signalling. Mutants are resistant to E. cichoracearum. Expressed throughout plant tissues and possibly localized to membranes /mitochondrion.	1.59383	8.15593e-64	UP
AT5G22570	ATWRKY38	member of WRKY Transcription Factor; Group III	1.59223	2.80459e-19	UP
AT2G47000	ABCB4	Multidrug resistance P-glycoprotein (MDR/PGP) subfamily of ABC transporters. Functions in the basipetal redirection of auxin from the root tip. Exhibits apolar plasma membrane localization in the root cap and polar localization in tissues above.	1.59111	3.36059e-23	UP
AT3G02875	ILR1	Hydrolyzes amino acid conjugates of the plant growth regulator indole-3-acetic acid (IAA), including IAA-Leu and IAA-Phe. Uses Mg and Co ions as cofactors.	1.58994	2.86801e-25	UP
AT2G24200	atLAP1	NA	1.58962	2.12965e-83	UP
AT3G12910	NA	NA	1.58936	7.48764e-06	UP
AT5G40780	AtLHT1	Encodes LHT1 (lysine histidine transporter), a high-affinity transporter for cellular amino acid uptake in both root epidermis and leaf mesophyll.	1.58733	2.04508e-32	UP
AT5G10650	2022-07-01	NA	1.58544	2.44581e-26	UP
AT3G55470	NA	NA	1.58391	6.19395e-25	UP
AT2G26695	NA	NA	1.58374	0.0216697	UP
AT5G13420	TRA2	NA	1.58258	2.229e-59	UP
AT3G46900	COPT2	encodes a member of copper transporter family and functionally complements a high affinity copper transporter mutant in yeast	1.58038	6.80044e-05	UP
AT4G11860	NA	NA	1.5773	1.98172e-56	UP
AT5G63030	GRXC1	NA	1.57665	6.84133e-54	UP
AT3G56080	NA	NA	1.57635	3.87564e-14	UP
AT5G01880	DAFL2	NA	1.57548	3.97981e-11	UP
AT1G25400	NA	NA	1.5745	7.29129e-17	UP
AT2G30140	UGT87A2	NA	1.57298	3.00045e-19	UP
AT5G04930	ALA1	Encodes a putative aminophospholipid translocase (p-type ATPase) involved in chilling response.	1.57076	5.33483e-41	UP
AT5G36907	NA	NA	1.56802	0.00543959	UP
AT1G52342	NA	NA	1.56722	7.21916e-11	UP
AT5G57050	ABI2	Encodes a protein phosphatase 2C and is involved in ABA signal transduction. Binds fibrillin preprotein in vitro and in vivo.	1.56719	5.23514e-35	UP
AT1G69610	NA	NA	1.56625	1.31931e-15	UP
AT5G61390	NEN2	NA	1.56577	1.77626e-16	UP
AT1G12210	RFL1	RFL1 has high sequence similarity to the adjacent disease resistance (R) gene RPS5.	1.56575	4.48319e-25	UP
AT2G26440	PME12	NA	1.56531	3.6961e-35	UP
AT2G36670	NA	NA	1.56434	4.56188e-21	UP
AT3G56950	SIP2	One of the Major Intrinsic Proteins(MIPs) which facilitate the passive transport of small molecules across membranes.Belongs to a family of plant aquaporins.Similar to yeast and radish aquaporins. Located on ER.	1.56389	1.57347e-36	UP
AT1G28210	AtDjB1	DnaJ homolog AtJ1 (atj)	1.56305	5.51765e-11	UP
AT2G05518	NA	NA	1.56264	0.000132222	UP
AT4G22260	IM	Similar to mitochondrial alternative oxidase. im mutants have a variegated phenotype and fail to differentiate chloroplasts in the majority of their cells under high light intensity continuous illumination. The white tissues of immutans accumulate phytoene, a non-colored C40 carotenoid intermediate. This suggests that immutans controls, either directly or indirectly, the activity of phytoene desa…	1.56222	8.65804e-70	UP
AT3G44880	ACD1	Encodes a pheide a oxygenase (PAO). Accelerated cell death (acd1) mutants show rapid, spreading necrotic responses to both virulent and avirulent Pseudomonas syringae pv. maculicola or pv. tomato pathogens and to ethylene.	1.56005	3.5042e-82	UP
AT1G20880	NA	NA	1.55851	1.00163e-22	UP
AT2G47470	ATPDI11	Encodes a protein disulfide isomerase-like (PDIL) protein, a member of a multigene family within the thioredoxin (TRX) superfamily. Transcript levels for this gene are up-regulated in response to three different chemical inducers of ER stress (dithiothreitol, beta-mercaptoethanol, and tunicamycin). AtIRE1-2 does not appear to be required for this response, but the atbzip60 mutant has a diminished…	1.55829	1.75269e-49	UP
AT3G44350	anac061	NA	1.55819	0.0240434	UP
AT5G51740	Oma1	NA	1.55818	9.71019e-36	UP
AT4G30870	ATMUS81	Encodes an Arabidopsis homolog of the endonuclease MSU81. T-DNA insertion lines of AtMSU81 have a deficiency in homologous recombination in somatic cells but only after genotoxic stress. Crosses with a hyperrecombinogenic mutant of the AtRecQ4A helicase resulted in synthetic lethality in the double mutant.	1.55806	4.14491e-10	UP
AT2G41835	NA	NA	1.5575	1.4536e-24	UP
AT2G18600	NA	NA	1.55675	4.66207e-05	UP
AT1G18570	AtMYB51	Encodes a member of the R2R3-MYB transcription family. Involved in indole glucosinolate biosynthesis.	1.55659	1.58e-12	UP
AT1G80460	GLI1	Encodes a protein similar to glycerol kinase, which converts glycerol to glycerol 3-phosphate and performs a rate-limiting step in glycerol metabolism. This gene is required for both general and specific resistance against bacteria and fungi. Arabidopsis thaliana glycerol kinase (GLR1) mRNA.Involved in flagellin-induced non-host resistance to Pseudomonas. Coronatine partially suppresses flagellin…	1.55494	1.1724e-107	UP
AT2G02310	AtPP2-B6	NA	1.55351	0.00537247	UP
AT2G38740	NA	NA	1.55152	3.91889e-58	UP
AT3G46700	NA	NA	1.55075	0.000815219	UP
ATMG00640	ORF25	encodes a plant b subunit of mitochondrial ATP synthase based on structural similarity and the presence in the F(0) complex.	1.55058	0.0221702	UP
AT1G53750	RPT1A	26S proteasome AAA-ATPase subunit RPT1a (RPT1a) mRNA,	1.54994	2.98016e-101	UP
AT5G20230	ATBCB	Al-stress-induced gene	1.5468	2.84305e-25	UP
AT1G69260	AFP1	NA	1.54646	1.7339e-05	UP
AT3G23240	AtERF#092	encodes a member of the ERF (ethylene response factor) subfamily B-3 of ERF/AP2 transcription factor family (ERF1). The protein contains one AP2 domain. There are 18 members in this subfamily including ATERF-1, ATERF-2, AND ATERF-5. EREBP like protein that binds GCC box of ethylene regulated promoters such as basic chitinases. Constitutive expression of ERF1 phenocopies ethylene over production. …	1.54555	2.73691e-05	UP
AT4G29040	RPT2a	26S proteasome AAA-ATPase subunit RPT2a (RPT2a) mRNA,	1.54511	8.74952e-94	UP
AT2G02340	AtPP2-B8	NA	1.54439	0.00717492	UP
AT1G09935	NA	NA	1.54398	0.00795728	UP
AT5G41040	ASFT	Encodes a feruloyl-CoA transferase required for suberin synthesis. Has feruloyl-CoA-dependent feruloyl transferase activity towards substrates with a primary alcohol.	1.5431	0.000130605	UP
AT5G54110	ATMAMI	Encodes a highly polar protein with more than 60% hydrophilic amino acid residues that is associated with the plasma membrane. It has limited secondary structure similarity to VAP-33 from Aplysia, which may be involved in membrane trafficking.	1.54213	1.64667e-41	UP
AT2G26170	CYP711A1	Encodes a protein with similarity to thromboxane-A synthase, member of the CYP711A cytochrome P450 family. MAX1 is a specific repressor of vegetative axillary buds generated by the axillary meristem. Expressed in vascular traces in the rosette stem and axillary buds throughout plant development. Mutants have increased axillary branches. Along with MAX3,4 thought to mediate control of shoot branch…	1.5418	5.36768e-16	UP
AT1G23440	NA	NA	1.54084	1.63303e-45	UP
AT5G39040	ABCB27	Encodes a member of TAP subfamily of ABC transporters that is located in the vacuole. Mutants are hypersensitive to aluminum and the gene product may be important for intracellular movement of some substrate, possibly chelated Al, as part of a mechanism of aluminum sequestration.	1.5405	1.89868e-53	UP
AT1G26130	NA	NA	1.53899	4.7971e-39	UP
AT3G53810	LecRK-IV.2	NA	1.53894	1.14796e-23	UP
AT2G44980	ASG3	NA	1.5383	1.02254e-23	UP
AT1G09300	AtICP55	NA	1.53807	1.18733e-23	UP
AT5G52860	ABCG8	NA	1.538	0.016084	UP
AT3G59690	IQD13	NA	1.53673	6.02493e-13	UP
AT5G09800	NA	NA	1.5349	1.34279e-06	UP
AT1G31280	AGO2	An Argonaute gene	1.53467	3.04683e-20	UP
AT3G52310	ABCG27	NA	1.53427	0.0164843	UP
AT3G26210	CYP71B23	putative cytochrome P450	1.53424	8.65329e-26	UP
AT2G17760	NA	NA	1.53302	6.341e-45	UP
AT1G31010	OSB4	NA	1.53279	5.81948e-11	UP
AT2G44080	ARL	Encodes ARL, a gene similar to ARGOS involved in cell expansion-dependent organ growth. Upregulated by brassinosteroid. Acts downstream of BRI1.	1.53239	9.60994e-20	UP
AT5G58940	CRCK1	Arabidopsis thaliana calmodulin-binding receptor-like kinase mRNA	1.53221	3.05579e-17	UP
AT4G38060	CCI2	NA	1.5322	8.1611e-25	UP
AT1G53030	NA	encodes a copper chaperone, can functional complements the yeast COX17 null mutant. May play a role in the delivery of copper to mitochondria. Expressed in roots and thus may also play a role in copper transport in the roots.	1.53208	1.00868e-16	UP
AT5G54100	AtSLP2	NA	1.53013	1.18059e-17	UP
AT1G69450	NA	NA	1.53003	2.34687e-36	UP
AT3G20660	AtOCT4	NA	1.52956	1.96293e-07	UP
AT5G44980	NA	NA	1.52922	3.31564e-07	UP
AT5G08335	ATICMTB	Encodes an isoprenyl cysteine methylatransferase (ICMT) involved in the post-translational processing of proteins that have a C-terminal CaaX box. This protein appears to have higher catalytic activity and a higher transcript expression level than the other ICMT present in Arabidopsis (At5g23320). Analysis of ICMT RNAi lines suggests that this protein is involved in flower and stem development.	1.52815	4.74314e-17	UP
AT1G09210	AtCRT1b	Encodes one of three Arabidopsis calreticulins.	1.52714	7.31714e-36	UP
AT1G24530	NA	NA	1.52388	4.48172e-15	UP
AT4G19080	NA	NA	1.52378	0.00704451	UP
AT5G40580	PBB2	Encodes 20S proteasome beta subunit PBB2 (PBB2).	1.52367	5.47065e-46	UP
AT1G53580	ETHE1	Mononuclear Fe(II)-containing member of the b-lactamase fold superfamily. ETHE1 is homodimeric in solution, exhibits low-level esterase activity, and specifically binds a single Fe(II) atom in the active site.	1.52317	4.66598e-65	UP
AT1G10700	PRS3	Encodes a P-independent phosphoribosyl pyrophosphate (PRPP) synthase.	1.52193	2.58856e-49	UP
AT3G10450	SCPL7	NA	1.52119	1.22251e-09	UP
AT1G10040	NA	NA	1.52095	5.59795e-08	UP
AT5G60360	AALP	Encodes a senescence-associated thiol protease.	1.52087	1.70016e-99	UP
AT1G21670	NA	NA	1.51942	5.78404e-37	UP
AT2G38710	NA	NA	1.51796	3.34496e-41	UP
AT3G55560	AGF2	NA	1.51793	4.35245e-16	UP
AT1G16470	PAB1	Encodes 20S proteasome subunit PAB1 (PAB1).	1.51696	1.06621e-62	UP
AT3G04220	NA	NA	1.5159	7.77345e-09	UP
AT5G23540	NA	NA	1.51506	1.6348e-85	UP
AT1G77450	anac032	NA	1.5144	4.0652e-20	UP
AT5G45510	NA	NA	1.51353	1.85443e-50	UP
AT5G48560	CIB2	NA	1.51337	4.43197e-10	UP
AT5G54240	NA	NA	1.51245	0.00173059	UP
AT5G16370	AAE5	NA	1.51228	3.9423e-45	UP
AT2G46400	ATWRKY46	member of WRKY Transcription Factor; Group III	1.51186	9.58579e-06	UP
AT5G17640	ASG1	NA	1.51132	7.21994e-38	UP
AT3G51670	PATL6	NA	1.51022	1.50103e-68	UP
AT1G64360	SAQR	NA	1.50986	1.54531e-16	UP
AT2G47140	AtSDR5	NA	1.5097	6.78234e-05	UP
AT5G38530	TSBtype2	NA	1.50953	4.99493e-56	UP
AT4G01920	NA	NA	1.50798	1.9068e-17	UP
AT5G41850	NA	NA	1.50788	1.00608e-10	UP
AT2G45170	ATATG8E	Involved in autophagy. Under nutrient starvation the protein localizes to autophagosomes.	1.50623	6.19883e-30	UP
AT1G65240	A39	NA	1.50556	7.87885e-09	UP
AT5G62740	ATHIR1	NA	1.50526	9.99421e-79	UP
AT5G03160	ATP58IPK	J domain protein localized in ER lumen. Can partially compensate for the growth defect in jem1 scj1 mutant yeast.	1.50271	2.62607e-24	UP
AT1G28580	NA	NA	1.50175	7.05867e-60	UP
AT3G08590	iPGAM2	NA	1.50111	2.89205e-92	UP
AT1G58180	ATBCA6	NA	1.50074	2.07343e-38	UP
AT3G52460	NA	NA	1.4995	5.74263e-06	UP
AT5G13190	AtGILP	NA	1.49932	1.06845e-20	UP
AT1G72900	NA	NA	1.49929	1.27916e-14	UP
AT3G60690	SAUR59	NA	1.49929	4.00387e-39	UP
AT2G36220	NA	NA	1.49902	5.6922e-25	UP
AT5G52070	NA	NA	1.49769	3.59779e-11	UP
AT3G47530	NA	NA	1.49763	3.68729e-17	UP
AT3G20960	CYP705A33	member of CYP705A	1.49628	1.84267e-17	UP
AT1G65040	AtHrd1B	NA	1.49574	2.04993e-38	UP
AT1G31750	NA	NA	1.49514	0.00175254	UP
AT1G15860	NA	NA	1.49438	2.29843e-47	UP
AT3G23530	NA	NA	1.49398	1.73479e-81	UP
AT1G27100	NA	NA	1.49346	8.26978e-22	UP
AT5G16170	NA	NA	1.49301	5.57254e-16	UP
AT3G08970	ATERDJ3A	J domain protein localized in ER lumen. Can compensate for the growth defect in jem1 scj1 mutant yeast. Also shows similarity to HSP40 proteins and is induced by heat stress. At high temperatures, mutant alleles are not transmitted through the pollen due to defects in pollen tube growth.	1.4928	2.86395e-09	UP
AT1G56170	ATHAP5B	Encodes a protein with similarity to a subunit of the CCAAT promoter motif binding complex of yeast.One of two members of this class (HAP5B) and expressed in vegetative and reproductive tissues	1.4915	0.00031429	UP
AT5G42020	BIP	Luminal binding protein (BiP2) involved in polar nuclei fusion during proliferation of endosperm nuclei.	1.49135	7.70448e-18	UP
AT4G02940	ALKBH10B	NA	1.4902	3.24416e-40	UP
AT3G60540	NA	NA	1.48994	4.75487e-11	UP
AT5G17060	ARFB1B	A member of ARF GTPase family. A thaliana has 21 members of this family, known to be essential for vesicle coating and uncoating and functions in GTP-binding. Gene encoding ADP-ribosylation factor and similar to ADP-ribosylation factor 1; ARF 1 (GP:385340) {Drosophila melanogaster), other ARFs and ARF-like proteins.	1.48986	6.03082e-34	UP
AT5G03905	NA	NA	1.48985	5.69382e-26	UP
AT1G26690	NA	NA	1.48944	2.34281e-25	UP
AT2G37460	UMAMIT12	NA	1.48855	1.80353e-14	UP
AT1G72200	NA	NA	1.48854	0.0282671	UP
AT2G40140	ATSZF2	NA	1.48824	3.1038e-15	UP
AT5G58710	ROC7	Encodes cyclophilin ROC7.	1.48799	4.45189e-53	UP
AT5G51040	SDHAF2	NA	1.48752	1.34437e-31	UP
AT4G33565	NA	NA	1.48683	2.74513e-11	UP
AT1G67365	NA	NA	1.48677	1.37685e-07	UP
AT3G06490	AtMYB108	putative transcription factor MYB108 (MYB108) mRNA,	1.48547	0.00684307	UP
AT5G53370	ATPMEPCRF	NA	1.48372	3.65514e-40	UP
AT3G11840	PUB24	Encodes a U-box-domain-containing E3 ubiquitin ligase that acts as a negative regulator of PAMP-triggered immunity.	1.48276	9.53475e-18	UP
AT3G17690	ATCNGC19	member of Cyclic nucleotide gated channel family	1.48274	1.93946e-08	UP
AT2G44910	ATHB-4	Encodes a homeodomain protein whose expression displays a dependence on phyB for both red and far-red light response. Also involved in the shade avoidance syndrome.	1.48267	9.7215e-05	UP
AT1G77810	NA	NA	1.48243	6.12516e-15	UP
AT3G09875	NA	NA	1.48199	4.13496e-07	UP
AT1G75380	ATBBD1	Encodes a nucleases AtBBD1 involved in ABA-mediated callose deposition.	1.48177	7.20139e-97	UP
AT1G07390	AtRLP1	NA	1.4814	4.66964e-10	UP
AT4G39780	NA	encodes a member of the DREB subfamily A-6 of ERF/AP2 transcription factor family. The protein contains one AP2 domain. There are 8 members in this subfamily including RAP2.4.	1.48101	1.66701e-17	UP
AT5G44920	AtTIK	NA	1.48059	0.0364973	UP
AT3G26230	CYP71B24	putative cytochrome P450	1.47998	4.71638e-29	UP
AT3G54960	ATPDI1	Encodes a protein disulfide isomerase-like (PDIL) protein, a member of a multigene family within the thioredoxin (TRX) superfamily. Transcript levels for this gene are up-regulated in response to three different chemical inducers of ER stress (dithiothreitol, beta-mercaptoethanol, and tunicamycin). Neither AtIRE1-2 nor AtbZIP60 appear to be required for this response.	1.47914	1.72516e-21	UP
AT1G11310	ATMLO2	A member of a large family of seven-transmembrane domain proteins specific to plants, homologs of the barley mildew resistance locus o (MLO) protein. The Arabidopsis genome contains 15 genes encoding MLO proteins, with localization in plasma membrane. Phylogenetic analysis revealed four clades of closely-related AtMLO genes. ATMLO2 belongs to the clade IV, with AtMLO3, AtMLO6 and AtMLO12. The gen…	1.47811	3.02054e-34	UP
AT5G22540	NA	NA	1.47798	6.73495e-11	UP
AT1G62422	NA	NA	1.47568	4.58285e-14	UP
AT3G11330	PIRL9	Encodes PIRL9, a member of the Plant Intracellular Ras-group-related LRRs (Leucine rich repeat proteins). PIRLs are a distinct, plant-specific class of intracellular LRRs that likely mediate protein interactions, possibly in the context of signal transduction. PIRL1 (AT5G05850) and PIRL9 (AT3G11330) are genetically redundant and are required for differentiation of microspores into pollen.	1.47452	2.92951e-29	UP
AT2G20670	NA	NA	1.47338	8.43411e-14	UP
AT1G47128	RD21	cysteine proteinase precursor-like protein/ dehydration stress-responsive gene (RD21)	1.47316	2.56152e-97	UP
AT3G52480	NA	NA	1.47292	3.06472e-14	UP
AT1G22840	ATCYTC-A	Encodes cytochrome c. Contains two site II (TGGGCC/T) elements, which interact with a TCP-domain transcription factor, and a downstream internal telomeric repeat, and are required for expression of the Cytc-1 gene. Promoter directs preferential expression in root and shoot meristems and in anthers.	1.47285	2.38395e-50	UP
AT2G15390	atfut4	Predicted fucosyltransferase, based on similarity to FUT1, but not functionally redundant with FUT1.	1.47166	2.50975e-14	UP
AT2G37710	LecRK-IV.1	Induced in response to Salicylic acid.	1.47069	9.12039e-36	UP
AT5G45500	NA	NA	1.47065	1.38621e-47	UP
AT1G50750	NA	NA	1.47054	0.0426811	UP
AT1G19700	BEL10	Encodes a member of the BEL family of homeodomain proteins. Its interaction with PLP (PAS/LOV PROTEIN) is diminished by blue light.	1.46946	2.52052e-40	UP
AT5G48670	AGL80	AGL80 is a member of the MADS box family of genes. AGL80 functions as a transcription factor within the central cell gene regulatory network and controls the expression of downstream genes required for central cell development and function.	1.46933	0.00540701	UP
AT3G45310	NA	NA	1.46914	9.24041e-52	UP
AT3G29034	NA	NA	1.46892	4.61006e-07	UP
AT1G66465	NA	NA	1.46819	3.60198e-12	UP
AT4G11890	ARCK1	NA	1.46817	6.2315e-16	UP
AT1G62840	NA	NA	1.46812	7.71508e-09	UP
AT5G03245	NA	NA	1.46768	0.000394496	UP
AT2G25110	AtSDF2	Encodes an endoplasmic reticulum protein SDF2 (stromal-derived factor-2). Forms a complex SDF2-ERdj3B-BiP that is required for the proper accumulation of the surface-exposed leucine-rich repeat receptor kinases EFR. EFR is involved in PAMP (pathogen associated molecular patterns) triggered immunity.	1.46635	4.6279e-43	UP
AT2G16595	NA	NA	1.46582	4.49257e-16	UP
AT1G56080	NAIP3	NA	1.46569	0.000779943	UP
AT2G19710	ISTL5	NA	1.46465	1.14395e-21	UP
AT1G25220	ASB1	Catalyzes the first step of tryptophan biosynthesis: Chorismate L-Glutamine = Anthranilate Pyruvate L-Glutamate. Functions as a heterocomplex with anthranilate synthase alpha subunit (ASA1 or ASA2).	1.46422	1.82413e-31	UP
AT4G32250	KOC1	NA	1.46354	7.62704e-34	UP
AT5G13200	GER5	NA	1.4635	9.35989e-35	UP
AT3G24090	GFAT	NA	1.46229	1.57742e-15	UP
AT1G16730	UP6	NA	1.46147	3.85775e-06	UP
AT1G60470	AtGolS4	NA	1.46039	0.0219858	UP
AT3G62600	ATERDJ3B	J domain protein localized in ER lumen. Can partially compensate for the growth defect in jem1 scj1 mutant yeast. Forms a complex SDF2-ERdj3B-BiP that is required for the proper accumulation of the surface-exposed leucine-rich repeat receptor kinases EFR. EFR is involved in PAMP (pathogen associated molecular patterns) triggered immunity.	1.46028	1.2381e-21	UP
AT3G20340	NA	Expression of the gene is downregulated in the presence of paraquat, an inducer of photoxidative stress.	1.46023	0.0263501	UP
AT4G29950	NA	NA	1.45933	1.16626e-44	UP
AT5G62680	AtNPF2.11	NA	1.45813	2.42977e-38	UP
AT2G21850	NA	NA	1.45643	4.9541e-26	UP
AT3G10250	NA	NA	1.45634	1.17608e-33	UP
AT4G25640	ATDTX35	Encodes a multidrug and toxin efflux family transporter. Involved in flavonoid metabolism, affecting Root growth, seed development and germination, and pollen development, release and viability.	1.45625	2.82375e-68	UP
AT1G30475	NA	NA	1.456	1.47097e-07	UP
AT5G50350	NA	NA	1.45595	5.498e-30	UP
AT1G07630	PLL5	Encodes a protein phosphatase 2C like gene, similar to POL. Involved in leaf development. Knockout mutants have abnormally shaped leaves.	1.45567	4.1719e-37	UP
AT2G24240	NA	NA	1.45543	1.06642e-18	UP
AT1G71100	RSW10	Encodes a ribose 5-phosphate isomerase involved in the formation of uridine used for the synthesis of UDP-sugars. Mutants of this gene are affected in cellulose biosynthesis.	1.45455	1.34186e-22	UP
AT2G05840	PAA2	Encodes 20S proteasome subunit PAA2 (PAA2).	1.45395	3.55819e-58	UP
AT1G04970	LBR-1	NA	1.45381	2.56558e-35	UP
AT5G45630	NA	NA	1.45332	0.00179539	UP
AT5G63990	NA	NA	1.45205	5.37496e-25	UP
AT2G16430	ATPAP10	NA	1.45191	5.03859e-41	UP
AT4G33360	FLDH	Encodes an NAD+-dependent dehydrogenase that oxidizes farnesol more efficiently than other prenyl alcohol substrates.	1.45159	2.25082e-48	UP
AT4G11070	AtWRKY41	member of WRKY Transcription Factor; Group III	1.45141	0.00015606	UP
AT5G03890	NA	NA	1.45094	0.00109745	UP
AT5G18780	NA	NA	1.45072	1.05813e-22	UP
AT1G08800	MyoB1	NA	1.44984	1.31089e-34	UP
AT1G60960	ATIRT3	Encodes a plasma membrane localized zinc/iron transporter.	1.44954	3.74835e-09	UP
AT4G22840	BASS6	NA	1.44867	2.6547e-20	UP
AT1G52420	NA	NA	1.44707	1.17413e-58	UP
AT5G59890	ADF4	actin depolymerizing factor 4 (ADF4) mRNA, complete cds	1.44564	7.41605e-77	UP
AT3G09810	IDH-VI	Encodes a catalytic subunit of the mitochondrially-localized NAD+- dependent isocitrate dehydrogenase	1.4456	1.13081e-36	UP
AT2G40435	NA	NA	1.44524	1.43782e-09	UP
AT3G18770	ATG13B	NA	1.44489	5.90344e-24	UP
AT5G25140	CYP71B13	putative cytochrome P450	1.44413	3.52527e-08	UP
AT2G27360	NA	NA	1.44392	4.51478e-13	UP
AT5G49480	ATCP1	AtCP1 encodes a novel Ca2+-binding protein, which shares sequence similarities with calmodulins. The expression of AtCP1 is induced by NaCl.	1.44323	6.08543e-22	UP
AT1G64500	NA	NA	1.44161	1.774e-08	UP
AT3G52770	ZPR3	ZPR3 is a small-leucine zipper containing protein that is involved in the establishment of leaf polarity.	1.44152	0.000101076	UP
AT1G22180	NA	NA	1.44099	2.67766e-35	UP
AT5G46410	SSP4	Encodes a SCP1-like small phosphatase (SSP). Three SSPs form a unique group with long N-terminal extensions: AT5G46410 (SSP4), AT5G11860 (SSP5), AT4G18140 (SSP4b). SSP4 and SSP4b were localized exclusively in the nuclei, whereas SSP5 accumulated in both nuclei and cytoplasm. All three SSPs encodes active CTD phosphatases like animal SCP1 family proteins, with distinct substrate specificities: SSP…	1.44007	3.37684e-30	UP
AT4G19045	MOB1B	NA	1.43794	7.12142e-14	UP
AT4G17840	NA	NA	1.43745	9.60096e-70	UP
AT5G03630	MDAR2	NA	1.437	2.33706e-49	UP
AT1G67800	RGLG5	NA	1.43648	1.46065e-26	UP
AT3G59140	ABCC10	member of MRP subfamily	1.43591	7.56363e-25	UP
AT5G07440	GDH2	Encodes the beta-subunit of the glutamate dehydrogenase. The enzyme is almost exclusively found in the mitochondria of stem and leaf companion cells.	1.43556	5.00169e-35	UP
AT5G52570	B2	Converts &#946;-carotene to zeaxanthin via cryptoxanthin.	1.43506	5.20583e-06	UP
AT5G02502	NA	NA	1.43503	4.31379e-25	UP
AT5G13550	SULTR4;1	Encodes a sulfate transporter.	1.43371	4.92287e-33	UP
AT2G03510	NA	NA	1.43335	2.49219e-40	UP
AT1G59640	BPE	A basic helix-loop-helix encoding gene (BIGPETAL, BPE) involved in the control of petal size. BPE is expressed via two mRNAs derived from an alternative splicing event. The BPEub (AT1G59640.1)transcript is expressed ubiquitously, whereas the BPEp (AT1G59640.2) transcript is preferentially expressed in petals. Plants that lack the petal-expressed variant BPEp have larger petals as a result of incr…	1.43146	4.904e-05	UP
AT1G77370	NA	NA	1.4314	7.09816e-22	UP
AT5G43780	APS4	sulfate adenylyltransferase, ATP sulfurylase	1.42997	2.02834e-35	UP
AT4G39140	NA	NA	1.42993	7.65623e-46	UP
AT4G29380	AtVPS15	NA	1.42849	3.8506e-52	UP
AT1G14370	APK2A	Encodes protein kinase APK2a.	1.42833	2.57926e-19	UP
AT2G21620	RD2	Encodes gene that is induced in response to dessication; mRNA expression is seen 10 and 24 hrs after start of dessication treatment.	1.42805	2.14496e-50	UP
AT4G00550	DGD2	encodes a UDP-galactose-dependent digalactosyldiacylglycerol(DGDG) synthase. Located in chloroplast outer membrane.	1.4276	3.15194e-34	UP
[truncated: 8,588 more rows]

## Sheet: DEG_cgb
The differentially expressed genes after Psm infection in the cgb mutant and its complementation line.
TAIR_Locus	Symbol	Annotation	Log2FoldChange	pvalue	UP_or_DOWN_regulated
AT5G13170	AtSWEET15	NA	10.6583	4.04322e-19	UP
AT4G32810	ATCCD8	Encodes a protein with similarity to carotenoid cleaving deoxygenases, the enzymes that cleave beta-carotene. Involved in the production of a graft transmissable signal to suppress axillary branching. Protein is localized to chloroplast stroma and expressed primarily in root tip. Mutants in the gene exhibit increased shoot branching, and light-dependent defects in hook opening and hypocotyl/root …	8.91549	4.24294e-13	UP
AT1G69880	ATH8	NA	8.81056	1.23069e-24	UP
AT3G21305	NA	NA	8.72324	1.14431e-12	UP
AT2G45685	NA	NA	8.49411	0.0297457	UP
AT1G04580	AAO4	Encodes aldehyde oxidase AAO4 preferentially expressed in developing seeds.	8.473	9.62372e-12	UP
AT1G05523	NA	NA	8.44267	0.0307518	UP
AT4G39838	NA	NA	8.38053	0.0320059	UP
AT2G45310	GAE4	UDP-D-glucuronate 4-epimerase	8.36435	0.0323397	UP
AT5G59730	ATEXO70H7	A member of EXO70 gene family, putative exocyst subunits, conserved in land plants. Arabidopsis thaliana contains 23 putative EXO70 genes, which can be classified into eight clusters on the phylogenetic tree.	8.10304	9.13984e-10	UP
AT3G57700	ZRK10	NA	8.0553	9.32743e-11	UP
AT5G38030	NA	NA	8.01525	1.22581e-10	UP
AT2G40370	LAC5	putative laccase, a member of laccase family of genes (17 members in Arabidopsis).	7.79593	3.87336e-09	UP
AT2G42560	LEA25	NA	7.72241	5.79077e-08	UP
AT3G53480	ABCG37	Negative regulator of auxin polar transport inhibitors. ABCG37 regulates auxin distribution and homeostasis in roots by excluding IBA from the root apex, but does not act directly in basipetal transport. ABCG37 and ABCG36 act redundantly at outermost root plasma membranes and, transport IBA out of the cells.	7.45091	7.59529e-18	UP
AT2G34610	NA	NA	7.31277	4.15337e-09	UP
AT1G10586	NA	NA	7.25714	7.48789e-08	UP
AT1G52690	LEA7	NA	7.24559	7.23116e-15	UP
AT3G02480	ABR	NA	7.24061	1.23053e-56	UP
AT1G08543	NA	NA	7.18756	7.88262e-08	UP
AT2G47770	ATTSPO	Encodes a membrane-bound protein designated AtTSPO (Arabidopsis thaliana TSPO-related). AtTSPO is related to the bacterial outer membrane tryptophan-rich sensory protein (TspO) and the mammalian mitochondrial 18 kDa Translocator Protein (18 kDa TSPO), members of the TspO/MBR domain-containing membrane proteins. Mainly detected in dry seeds, but can be induced in vegetative tissues by osmotic or s…	7.17231	5.53284e-11	UP
AT4G22230	NA	NA	7.05545	6.54575e-08	UP
AT3G11430	ATGPAT5	Encodes a protein with glycerol-3-phosphate acyltransferase activity, involved in the biosynthesis of suberin polyester.	7.03536	9.78822e-08	UP
AT2G02580	CYP71B9	member of CYP71B	7.03518	8.75699e-08	UP
AT2G31180	ATMYB14	Member of the R2R3 factor gene family.	6.86506	8.6729e-07	UP
AT4G33610	NA	NA	6.84269	4.75928e-07	UP
AT4G36700	NA	NA	6.81951	2.64397e-07	UP
AT1G80590	ATWRKY66	member of WRKY Transcription Factor; Group III	6.72333	5.96114e-07	UP
AT4G33020	ATZIP9	member of Fe(II) transporter isolog family	6.72323	6.85655e-07	UP
AT3G21500	DXL1	Encodes a protein postulated to have 1-deoxy-D-xylulose 5-phosphate synthase activity.	6.7222	6.89216e-12	UP
AT4G19925	NA	NA	6.64693	1.18442e-06	UP
AT1G22480	NA	NA	6.50949	6.0125e-06	UP
AT3G08860	PYD4	Encodes a protein that is predicted to have beta-alanine aminotransferase activity.	6.48695	1.33694e-86	UP
AT4G28940	NA	NA	6.48028	3.29869e-06	UP
AT2G38380	NA	NA	6.48006	6.05872e-06	UP
AT1G66280	BGLU22	NA	6.48	2.75031e-06	UP
AT1G18290	NA	NA	6.42015	3.60945e-06	UP
AT4G36610	NA	NA	6.38885	4.06166e-06	UP
AT2G04805	NA	NA	6.36325	1.33707e-06	UP
AT2G48130	LTPG15	NA	6.32449	3.01201e-05	UP
AT1G03790	AtTZF4	Encodes SOMNUS (SOM), a nucleus-localized CCCH-type zinc finger protein. SOM negatively regulates light-dependent seed germination downstream of PIL5 (AT2G20180).	6.29089	1.99448e-05	UP
AT4G28040	UMAMIT33	NA	6.19715	2.21361e-15	UP
AT3G57510	ADPG1	Encodes ADPG1, a polygalacturonase protein involved in silique and anther dihiscence. Loss of function mutations have reduced seed set, indehiscent fruit and reduced pollen shedding.	6.15043	1.88054e-05	UP
AT5G23000	NA	NA	6.15033	3.36288e-05	UP
AT5G05340	PRX52	NA	6.08566	9.94366e-30	UP
AT3G17520	NA	NA	6.0747	1.88516e-05	UP
AT2G04190	NA	NA	6.07447	4.16313e-05	UP
AT3G01420	ALPHA-DOX1	Encodes an alpha-dioxygenase involved in protection against oxidative stress and cell death. Induced in response to Salicylic acid and oxidative stress. Independent of NPR1 in induction by salicylic acid.	6.06626	9.69877e-100	UP
AT2G20825	ULT2	NA	6.03554	2.23495e-05	UP
AT5G42800	DFR	dihydroflavonol reductase. Catalyzes the conversion of dihydroquercetin to leucocyanidin in the biosynthesis of anthocyanins.	6.03301	4.05516e-06	UP
AT1G05450	NA	Encodes a Protease inhibitor/seed storage/LTP family protein	5.99445	3.33971e-05	UP
AT5G60470	EGRET	NA	5.99086	5.10961e-06	UP
AT5G09530	PELPK1	NA	5.98026	3.06378e-09	UP
AT2G31690	DALL5	encodes a triacylglycerol lipase located in plastoglobuli and involved in the degradation of triacylglycerol. It also has impact on leaf senescence and maintaining the structural integrity of thylakoids.	5.95293	3.21872e-05	UP
AT5G38020	NA	encodes a protein whose sequence is similar to SAM:salicylic acid carboxyl methyltransferase (SAMT) (GI:6002712)(Clarkia breweri) and to SAM:benzoic acid carboxyl methyltransferase (BAMT)(GI:9789277)(Antirrhinum majus)	5.95257	4.66938e-05	UP
AT5G63240	NA	NA	5.9521	9.36066e-05	UP
AT1G54540	NHL11	NA	5.90942	6.00018e-05	UP
AT3G13432	NA	NA	5.90919	8.36812e-05	UP
AT3G14395	MAT1	NA	5.90898	0.000145697	UP
AT3G50400	NA	NA	5.90367	6.60664e-06	UP
AT1G15380	GLYI4	NA	5.78885	2.4981e-13	UP
AT2G19900	ATNADP-ME1	The malic enzyme (EC 1.1.1.40) encoded by AtNADP-ME1 is expressed in response to developmental and cell-specific signals. The enzyme is active in vitro and appears to function as a homohexamer or homooctamer. It is believed to be a cytosolic protein.	5.77218	0.000122353	UP
AT5G09930	ABCF2	member of GCN subfamily	5.7717	0.000150597	UP
AT3G12230	NA	NA	5.72608	4.48233e-10	UP
AT3G20110	CYP705A20	member of CYP705A	5.72318	0.000318566	UP
AT2G03850	NA	NA	5.72291	0.000223531	UP
AT1G17020	ATSRG1	Encodes a novel member of the Fe(II)/ascorbate oxidase gene family; senescence-related gene.	5.71488	6.49715e-22	UP
AT5G19890	NA	NA	5.6733	0.000200322	UP
AT5G13900	NA	NA	5.67291	0.000137324	UP
AT5G43580	UPI	Predicted to encode a PR (pathogenesis-related) peptide that belongs to the PR-6 proteinase inhibitor family. Six putative PR-6-type protein encoding genes are found in Arabidopsis: At2g38900, At2g38870, At5g43570, At5g43580, At3g50020 and At3g46860.	5.65495	1.21299e-42	UP
AT2G24285	NA	NA	5.57613	3.07725e-05	UP
AT1G73260	ATKTI1	Encodes a trypsin inhibitor involved in modulating programmed cell death in plant-pathogen interactions.	5.55572	5.79577e-15	UP
AT4G11650	ATOSM34	osmotin-like protein	5.52061	9.41534e-50	UP
AT5G23190	CYP86B1	cytochrome P450 CYP86B1, nuclear gene for chloroplast product. CYP86B1 is a very long chain fatty acid hydroxylase specifically involved in polyester monomer biosynthesis during the course of plant development.	5.5101	0.00104327	UP
AT1G01453	NA	NA	5.50972	0.000368959	UP
AT3G60140	BGLU30	Encodes a protein similar to beta-glucosidase and is a member of glycoside hydrolase family 1. Expression is induced after 24 hours of dark treatment, in senescing leaves and treatment with exogenous photosynthesis inhibitor. Induction of gene expression was suppressed in excised leaves supplied with sugar. The authors suggest that the gene's expression pattern is responding to the level of sugar…	5.50467	2.7545e-34	UP
AT5G50360	AITR5	NA	5.49922	2.48163e-06	UP
AT1G26400	NA	NA	5.45072	0.000410638	UP
AT5G24205	NA	NA	5.45061	0.000410636	UP
AT3G46520	ACT12	Member of actin subclass composed of ACT12 and ACT4. RNA is expressed at very low levels in vegetative organs, low levels in flowers and very high levels in pollen. Expression of an ACT12/GUS fusion was found in vascular tissues, tapetum, developing and mature pollen, the root cap and in a ring of pericycle tissues during lateral root initiation and early development.	5.43381	1.47567e-08	UP
AT3G22560	NA	NA	5.42192	1.15339e-08	UP
AT3G44550	FAR5	Encodes a member of the eight-member gene family encoding alcohol-forming fatty acyl-CoA reductases (FARs) identified in Arabidopsis thaliana. Three of the FARs, FAR1 (At5g22500), FAR4 (At3g44540) and FAR5 (At3g44550), are shown to generate the fatty alcohols found in root, seed coat, and wound-induced leaf tissue.	5.40593	2.17884e-27	UP
AT3G15670	NA	NA	5.32861	0.000834082	UP
AT1G26240	NA	NA	5.32518	0.000736886	UP
AT2G37555	NA	NA	5.32474	0.000654839	UP
AT3G44300	AtNIT2	Encodes an enzyme that catalyzes the hydrolysis of indole-3-acetonitrile (IAN) to indole-3-acetic acid (IAA) (nitrile aminohydrolase, EC 3.5.5.1) and IAN to indole-3-acetamide (IAM) at lower levels. Mutants have reduced sensitivity to IAN and are sensitive to IAA. This enzyme likely participates in other non-auxin-related metabolic pathways.	5.31087	1.06862e-22	UP
AT2G41800	TEB	NA	5.29812	9.59794e-130	UP
AT1G80580	NA	encodes a member of the ERF (ethylene response factor) subfamily B-1 of ERF/AP2 transcription factor family. The protein contains one AP2 domain. There are 15 members in this subfamily including ATERF-3, ATERF-4, ATERF-7, and leafy petiole.	5.29582	0.000120138	UP
AT5G13580	ABCG6	NA	5.29365	6.0262e-06	UP
AT5G51760	AHG1	Encodes AHG1 (ABA-hypersensitive germination 1), a putative protein phosphatase 2C (PP2C). Expressed in seeds. AHG1 functions in seed development and germination.	5.25749	0.000914802	UP
AT2G33780	NA	NA	5.25732	0.00149736	UP
AT2G21100	NA	NA	5.2572	0.00119154	UP
AT5G07650	NA	NA	5.24276	9.61598e-20	UP
AT1G13310	NA	NA	5.2414	8.72884e-05	UP
AT3G21890	BBX31	NA	5.22653	2.08895e-10	UP
AT1G80160	GLYI7	NA	5.22267	8.56508e-10	UP
AT4G23680	NA	NA	5.21399	4.32939e-62	UP
AT1G19230	AtRbohE	NA	5.21258	2.23056e-21	UP
AT3G61930	NA	NA	5.21099	4.23149e-14	UP
AT4G36052	NA	NA	5.18779	0.00144585	UP
AT4G10510	NA	NA	5.11404	0.00237102	UP
AT1G09433	NA	NA	5.1137	0.0156683	UP
AT1G03050	PICALM5A	NA	5.11355	0.000350969	UP
AT5G53990	NA	NA	5.11321	0.00157245	UP
AT1G68380	NA	NA	5.11316	0.00162322	UP
AT2G41850	ADPG2	ADPG2.	5.11181	0.0205286	UP
AT3G09220	LAC7	putative laccase, a member of laccase family of genes (17 members in Arabidopsis).	5.073	6.46804e-09	UP
AT5G24910	CYP714A1	member of CYP714A	5.05898	2.22616e-25	UP
AT1G24320	NA	NA	5.05169	1.97e-05	UP
AT3G59620	NA	NA	5.03598	0.0029132	UP
AT5G15480	NA	NA	5.03564	0.00236873	UP
AT5G50590	NA	NA	5.03564	0.00236873	UP
AT5G50690	NA	NA	5.03564	0.00236873	UP
AT5G54040	NA	NA	5.03532	0.00230267	UP
AT1G66390	ATMYB90	production of anthocyanin pigment 2 protein (PAP2)	5.03283	0.000355959	UP
AT1G62580	NA	NA	5.02263	1.74012e-07	UP
AT3G46680	NA	NA	4.9623	3.27857e-07	UP
AT5G14000	anac084	NA	4.9622	2.55112e-05	UP
AT3G11480	ATBSMT1	The gene encodes a SABATH methyltransferase that methylates both salicylic acid and benzoic acid. It is highly expressed in flowers, induced by biotic and abiotic stress and thought to be involved in direct defense mechanism.	4.95851	8.16067e-05	UP
AT4G03038	NA	NA	4.95312	0.00484487	UP
AT4G13390	EXT12	NA	4.95275	0.00304401	UP
AT5G23990	ATFRO5	Encodes a ferric chelate reductase that is expressed at low levels in roots,shoots and flowers, but not cotyledons.	4.95273	0.00522908	UP
AT1G68850	NA	NA	4.95254	0.00726429	UP
AT1G16160	WAKL5	WAK-like kinase	4.95207	0.0072689	UP
AT5G17220	ATGSTF12	Encodes glutathione transferase belonging to the phi class of GSTs. Naming convention according to Wagner et al. (2002). Mutants display no pigments on leaves and stems.	4.94536	6.66783e-07	UP
AT3G46700	NA	NA	4.89215	4.06298e-20	UP
AT1G09987	NA	NA	4.86648	0.0310658	UP
AT3G48920	AtMYB45	Member of the R2R3 factor gene family.	4.86618	0.00647618	UP
AT1G30990	NA	NA	4.86586	0.00459328	UP
AT4G28110	NA	NA	4.86577	0.00490335	UP
AT1G55240	NA	NA	4.86556	0.00382211	UP
AT1G55990	NA	NA	4.86542	0.00890089	UP
AT1G24580	NA	NA	4.86532	0.00490588	UP
AT3G26820	NA	NA	4.86469	0.00890975	UP
AT3G60920	BCHC1	NA	4.86469	0.00890975	UP
AT3G04320	NA	NA	4.81485	4.8419e-05	UP
AT5G14130	NA	NA	4.81066	0.000863646	UP
AT1G69920	NA	NA	4.79264	3.81877e-13	UP
AT5G46950	NA	NA	4.77306	0.0335587	UP
AT3G52780	ATPAP20	NA	4.7729	0.00759919	UP
AT1G73270	scpl6	NA	4.77282	0.00624555	UP
AT5G06090	NA	NA	4.77276	0.00682646	UP
AT3G56220	NA	NA	4.77242	0.00586854	UP
AT2G22510	NA	NA	4.77227	0.00606911	UP
AT3G18450	NA	NA	4.77211	0.0076068	UP
AT5G65510	AIL7	NA	4.77202	0.0060709	UP
AT1G74190	NA	NA	4.76151	0.00104203	UP
AT1G45616	AtRLP6	NA	4.74686	1.64841e-12	UP
AT1G48000	AtMYB112	Encodes a putative transcription factor (MYB112).	4.73959	6.14529e-06	UP
AT4G17280	NA	NA	4.71105	0.00181533	UP
AT1G71770	PAB5	Encodes a Class I polyA-binding protein. Expressed in floral organs. Binds polyA sepharose in vitro.	4.71091	0.00114372	UP
AT4G31960	NA	NA	4.71087	0.00116285	UP
AT3G03650	NA	NA	4.70808	0.000104305	UP
AT3G53065	NA	NA	4.70806	0.00016142	UP
AT4G02320	NA	NA	4.67938	0.000148586	UP
AT4G22460	NA	NA	4.6732	0.00814159	UP
AT1G52110	NA	NA	4.67271	0.00981308	UP
AT1G67100	LBD40	NA	4.6727	0.00737083	UP
AT2G45580	CYP76C3	member of CYP76C	4.67268	0.010813	UP
AT1G76480	NA	NA	4.672	0.0108227	UP
AT2G41342	NA	NA	4.67056	2.3725e-06	UP
AT5G02580	NA	NA	4.6597	3.7515e-09	UP
AT4G12545	NA	NA	4.65889	0.00156449	UP
AT5G07310	NA	NA	4.65808	0.00170277	UP
AT3G46280	NA	NA	4.65231	4.77894e-76	UP
AT2G39530	CASPL4D1	NA	4.63195	7.7919e-32	UP
AT2G42060	NA	NA	4.59264	3.64437e-06	UP
AT1G25460	NA	NA	4.59262	0.000147558	UP
AT5G53820	NA	NA	4.57259	7.83485e-11	UP
AT5G48430	NA	NA	4.56701	0.0446323	UP
AT5G57785	NA	NA	4.5661	4.34627e-14	UP
AT1G26970	NA	NA	4.56575	0.0177675	UP
AT4G07815	NA	NA	4.56575	0.0177675	UP
AT1G51915	NA	NA	4.56565	0.01091	UP
AT3G29590	AT5MAT	At3g29590 (At5MAT) encodes a malonyl-CoA:anthocyanidin 5-O-glucoside-6-O-malonyltransferase that is coordinately expressed with a epistatic 5-O-anthocyanidin glucosyltransferase (At4g14090). The enzyme is involved in the malonylation of anthocyanins in Arabidopsis.	4.56556	0.0113028	UP
AT4G37295	PIPL3	NA	4.56556	0.0113028	UP
AT2G07275	NA	NA	4.56554	0.0129749	UP
AT2G01379	NA	NA	4.56554	0.0447217	UP
AT3G48700	ATCXE13	NA	4.56488	0.0210208	UP
AT5G59310	AtLtpI-11	Encodes a member of the lipid transfer protein family. Proteins of this family are generally small (~9 kD), basic, expressed abundantly and contain eight Cys residues. The proteins can bind fatty acids and acylCoA esters and can transfer several different phospholipids. They are localized to the cell wall. The mRNA is present in flowers and siliques, and is strongly up-regulated by abscisic acid.…	4.54073	1.63681e-46	UP
AT5G09520	PELPK2	NA	4.53124	0.000256209	UP
AT5G14180	MPL1	NA	4.51763	4.03964e-22	UP
AT3G49130	NA	NA	4.48779	3.86508e-05	UP
AT1G68450	PDE337	NA	4.48727	0.00787626	UP
AT5G19410	NA	NA	4.45093	0.0192649	UP
AT2G48140	EDA4	NA	4.45091	0.0258914	UP
AT1G04353	NA	NA	4.45069	0.0372456	UP
AT5G07165	NA	NA	4.45042	0.0143395	UP
AT2G03360	NA	NA	4.44454	9.96533e-06	UP
AT1G65610	ATGH9A2	NA	4.42209	6.5077e-16	UP
AT1G09500	NA	similar to Eucalyptus gunnii alcohol dehydrogenase of unknown physiological function (GI:1143445), Vigna unguiculata (gi:1854445), NOT a cinnamyl-alcohol dehydrogenase	4.40811	2.34225e-60	UP
AT1G03660	NA	NA	4.4058	8.54017e-18	UP
AT3G17180	scpl33	NA	4.39894	0.00523859	UP
AT2G45760	BAL	encodes a protein that is similar to BONZAI1-binding protein BAP1.	4.38226	1.14377e-91	UP
AT3G51360	NA	NA	4.38225	6.72946e-07	UP
AT2G45570	CYP76C2	member of CYP76C	4.38225	1.95206e-08	UP
AT1G15625	NA	NA	4.37001	3.98322e-11	UP
AT5G44570	CWM2	NA	4.3651	8.95469e-85	UP
AT3G48840	NA	NA	4.36291	0.00390612	UP
AT3G25180	CYP82G1	member of CYP82G	4.36045	3.72522e-14	UP
AT4G12480	EARLI1	a putative lipid transfer protein, vernalization-responsive and cold-induced	4.34113	1.34379e-61	UP
AT2G34080	NA	NA	4.33748	0.0108053	UP
AT1G51640	ATEXO70G2	A member of EXO70 gene family, putative exocyst subunits, conserved in land plants. Arabidopsis thaliana contains 23 putative EXO70 genes, which can be classified into eight clusters on the phylogenetic tree.	4.33104	1.37243e-07	UP
AT2G05510	NA	NA	4.32984	2.02776e-05	UP
AT2G14620	XTH10	NA	4.32887	3.94568e-54	UP
AT1G33940	NA	NA	4.32529	0.024831	UP
AT2G14440	NA	NA	4.32508	0.0303856	UP
AT4G37420	NA	NA	4.32506	0.0207348	UP
AT3G50980	XERO1	NA	4.32505	0.0285151	UP
AT4G38030	NA	NA	4.32497	0.023288	UP
AT2G22630	AGL17	Encodes a MADs domain containing protein involved in promoting flowering. Loss of function mutations show delayed flowering in long days and reduced levels of LFY and AP1 expression.	4.32464	0.0232984	UP
AT5G38320	NA	NA	4.32442	0.0304135	UP
AT1G73220	AtOCT1	NA	4.32431	0.0248647	UP
AT5G56060	NA	NA	4.3242	0.0248686	UP
AT1G66560	NA	NA	4.32373	0.0366615	UP
AT1G33960	AIG1	Identified as a gene that is induced by avirulence gene avrRpt2 and RPS2 after infection with Pseudomonas syringae pv maculicola strain ES4326 carrying avrRpt2	4.31658	1.84994e-60	UP
AT4G21680	AtNPF7.2	Encodes a nitrate transporter (NRT1.8). Functions in nitrate removal from the xylem sap. Mediates cadmium tolerance.	4.31405	1.18392e-26	UP
AT4G18360	GOX3	NA	4.30904	3.29931e-30	UP
AT1G13480	NA	NA	4.30525	6.11724e-19	UP
AT5G56200	NA	NA	4.29661	0.00665656	UP
AT5G24316	NA	NA	4.29643	0.00584912	UP
AT2G41380	NA	NA	4.29325	2.75232e-40	UP
AT4G22467	NA	NA	4.29231	2.76257e-12	UP
AT1G05680	UGT74E2	Encodes a UDP-glucosyltransferase, UGT74E2, that acts on IBA (indole-3-butyric acid) and affects auxin homeostasis. The transcript and protein levels of this enzyme are strongly induced by H2O2 and may allow integration of ROS (reactive oxygen species) and auxin signaling. This enzyme can also transfer glycosyl groups to several compounds related to the explosive TNT when this synthetic compound …	4.29027	9.87974e-22	UP
AT4G12490	AZI3	NA	4.27348	2.8647e-84	UP
AT1G61810	BGLU45	NA	4.27047	2.84444e-19	UP
AT1G30700	AtBBE8	NA	4.26889	1.84155e-36	UP
AT4G03540	CASPL1C1	NA	4.24767	6.8457e-13	UP
AT3G22620	NA	NA	4.246	7.22041e-38	UP
AT5G15500	NA	NA	4.2386	2.86059e-31	UP
AT4G12500	NA	NA	4.23567	1.27395e-77	UP
AT5G02695	NA	NA	4.22433	0.028758	UP
AT5G40010	AATP1	NA	4.21314	9.77991e-67	UP
AT3G55970	ATJRG21	NA	4.20339	1.21757e-07	UP
AT5G57510	NA	NA	4.20032	0.000130296	UP
AT5G06760	AtLEA4-5	Encodes LEA4-5, a member of the Late Embryogenesis Abundant (LEA) proteins which typically accumulate in response to low water availability conditions imposed during development or by the environment. Most of thediverse set of LEA proteins can be grouped according to properties such as high hydrophilicity and high content of glycine or other small amino acids in what has been termed hydrophilins.…	4.19918	6.0596e-15	UP
AT3G57380	NA	NA	4.19426	2.93566e-15	UP
AT3G43850	NA	NA	4.18739	0.0458466	UP
AT5G48000	CYP708	Encodes a member of the CYP708A family of cytochrome P450 enzymes. THAH appears to add a hydroxyl group to the triterpene thalianol. thah1 mutants have an elevated accumulation of thalianol. thah1-1 mutants have longer roots than wild type plants. Thalian-diol and desaturated thalian-diol are lost from the root extracts of thah1-1 mutants. Overexpression of the sequence from At5g48000.1 rescues t…	4.18682	0.0327666	UP
AT1G43640	AtTLP5	Member of TLP family	4.1867	0.0413973	UP
AT1G33950	NA	NA	4.1818	1.38793e-14	UP
AT3G10320	MUCI21	NA	4.18096	5.38627e-31	UP
AT1G01060	LHY	LHY encodes a myb-related putative transcription factor involved in circadian rhythm along with another myb transcription factor CCA1	4.18002	2.73718e-58	UP
AT4G11340	NA	NA	4.17782	9.3352e-05	UP
AT1G62370	NA	NA	4.17732	3.14727e-22	UP
AT5G41280	NA	NA	4.17709	0.000107712	UP
AT4G12495	NA	NA	4.17587	2.88299e-74	UP
AT4G10860	NA	NA	4.16641	3.52798e-79	UP
AT1G65970	TPX2	thioredoxin-dependent peroxidase 2	4.16493	3.14746e-58	UP
AT3G19615	NA	NA	4.16159	1.4756e-06	UP
AT3G02240	GLV4	Encodes a root meristem growth factor (RGF). Belongs to a family of functionally redundant homologous peptides that are secreted, tyrosine-sulfated, and expressed mainly in the stem cell area and the innermost layer of central columella cells. RGFs are required for maintenance of the root stem cell niche and transit amplifying cell proliferation. Members of this family include: At5g60810 (RGF1), …	4.15034	6.02924e-05	UP
AT2G32660	AtRLP22	NA	4.14968	9.61758e-08	UP
AT5G06720	ATPA2	NA	4.14726	8.53376e-37	UP
AT3G57950	NA	NA	4.13667	1.19082e-45	UP
AT2G43510	ATTI1	Member of the defensin-like (DEFL) family. Encodes putative trypsin inhibitor protein which may function in defense against herbivory.	4.13615	3.95082e-52	UP
AT1G15610	NA	NA	4.13585	0.00128749	UP
AT2G35730	NA	NA	4.11192	6.73382e-07	UP
AT4G28280	LLG3	NA	4.09556	0.00126806	UP
AT1G05880	ARI12	NA	4.08875	8.59848e-40	UP
AT4G24000	ATCSLG2	encodes a protein similar to cellulose synthase	4.07	4.78956e-06	UP
AT5G39520	NA	NA	4.04968	5.00383e-33	UP
AT5G50760	SAUR55	NA	4.03807	3.03483e-17	UP
AT2G26692	NA	NA	4.03592	0.0480539	UP
AT2G23540	NA	NA	4.03549	0.0480812	UP
AT3G03620	NA	NA	4.03498	0.0443074	UP
AT3G14060	NA	NA	4.02526	1.57218e-41	UP
AT4G36820	NA	NA	4.00599	0.00443753	UP
AT5G54060	UF3GT	NA	3.99002	0.0233418	UP
AT1G72490	NA	NA	3.98997	0.021259	UP
AT3G48580	XTH11	NA	3.97561	3.81838e-20	UP
AT1G30100	ATNCED5	Encodes 9-cis-epoxycarotenoid dioxygenase, a key enzyme in the biosynthesis of abscisic acid. The expression of this gene increases during the first 6h of imbibition.	3.94927	2.00505e-36	UP
AT5G58840	NA	NA	3.947	1.13243e-42	UP
AT2G29470	ATGSTU3	Encodes glutathione transferase belonging to the tau class of GSTs. Naming convention according to Wagner et al. (2002).	3.93925	1.47741e-31	UP
AT3G57010	NA	NA	3.93883	4.01242e-17	UP
AT1G61820	BGLU46	NA	3.91948	1.01072e-15	UP
AT3G55150	ATEXO70H1	A member of EXO70 gene family, putative exocyst subunits, conserved in land plants. Arabidopsis thaliana contains 23 putative EXO70 genes, which can be classified into eight clusters on the phylogenetic tree.	3.91388	5.617e-12	UP
AT1G02470	NA	NA	3.91204	9.28374e-65	UP
AT2G40170	ATEM6	Encodes a group 1 LEA gene that is activated by direct binding of ABI5 to its promoter and is involved in response to ABA. Is required for normal seed development. Involved in regulating the timing of dessication tolerance and rate of water loss during seed maturation.	3.90378	0.0196442	UP
AT3G44560	NA	NA	3.90331	0.019654	UP
AT5G43350	NA	NA	3.90331	0.0196571	UP
AT3G44540	FAR4	Encodes a member of the eight-member gene family encoding alcohol-forming fatty acyl-CoA reductases (FARs) identified in Arabidopsis thaliana. Three of the FARs, FAR1 (At5g22500), FAR4 (At3g44540) and FAR5 (At3g44550), are shown to generate the fatty alcohols found in root, seed coat, and wound-induced leaf tissue.	3.88151	0.000294394	UP
AT4G36430	NA	NA	3.87734	9.19346e-57	UP
AT1G18860	ATWRKY61	member of WRKY Transcription Factor; Group II-b	3.87474	3.44191e-36	UP
AT4G33150	LKR	NA	3.86996	1.07461e-146	UP
AT1G69480	NA	NA	3.86736	1.74777e-06	UP
AT4G22470	NA	NA	3.84409	2.51713e-14	UP
AT2G36750	UGT73C1	NA	3.84001	6.69507e-05	UP
AT4G11655	NA	NA	3.82275	1.50064e-44	UP
AT5G15130	ATWRKY72	member of WRKY Transcription Factor; Group II-b; contribute to basal immunity.	3.81447	8.88596e-16	UP
AT4G12530	AZI7	NA	3.81365	0.00616298	UP
AT1G10220	NA	NA	3.81365	0.000827825	UP
AT1G07753	NA	NA	3.81128	0.028616	UP
AT4G22030	NA	NA	3.8111	0.0220703	UP
AT5G47740	NA	NA	3.8108	0.0243704	UP
ATMG01370	ORF111D	hypothetical protein	3.81054	0.0220777	UP
AT2G44070	NA	NA	3.81016	0.0236502	UP
AT1G76470	NA	NA	3.80928	2.38106e-11	UP
AT4G03460	NA	NA	3.77181	9.08232e-10	UP
AT1G53830	ATPME2	encodes a pectin methylesterase	3.75843	2.41278e-56	UP
AT2G37750	NA	NA	3.74313	6.26995e-05	UP
AT2G45220	AtPME17	NA	3.73452	2.95397e-14	UP
AT4G37990	ATCAD8	Encodes an aromatic alcohol:NADP+ oxidoreductase whose mRNA levels are increased in response to treatment with a variety of phytopathogenic bacteria. Though similar to mannitol dehydrogenases, this enzyme does not have mannitol dehydrogenase activity.	3.73191	0.00034964	UP
AT4G10720	NA	NA	3.73042	6.41607e-06	UP
AT5G39580	NA	NA	3.72927	1.63811e-12	UP
AT2G21900	NA	NA	3.72905	8.18349e-08	UP
AT2G26290	ARSK1	NA	3.72904	2.85631e-26	UP
AT3G13610	F6'H1	NA	3.71407	1.37348e-43	UP
AT3G27400	PLL18	NA	3.71383	5.87706e-112	UP
AT1G69600	ATHB29	Encodes ZFHD1, a member of the zinc finger homeodomain transcriptional factor family. Binds to the 62 bp promoter region of ERD1 (early responsive to dehydration stress 1). Expression of ZFHD1 is induced by drought, high salinity and abscisic acid.	3.71066	0.0255659	UP
AT2G26410	Iqd4	NA	3.7105	0.026706	UP
AT4G00130	NA	NA	3.71049	0.0373935	UP
AT1G44608	NA	NA	3.70822	0.00629794	UP
AT2G47950	NA	NA	3.70763	2.29371e-05	UP
AT2G26480	UGT76D1	NA	3.70716	9.46098e-23	UP
AT5G46960	AtPMEI12	NA	3.70256	8.40197e-13	UP
AT1G02580	EMB173	Encodes a putative transcription factor MEDEA (MEA) that negatively regulates seed development in the absence of fertilization. Mutations in this locus result in embryo lethality. MEA is a Polycomb group gene that is imprinted in the endosperm. The maternal allele is expressed and the paternal allele is silent. MEA is controlled by DEMETER (DME), a DNA glycosylase required to activate MEA express…	3.70188	1.52699e-12	UP
AT3G02885	GASA5	NA	3.69349	2.77156e-10	UP
AT2G39518	CASPL4D2	NA	3.68743	3.54177e-31	UP
AT1G62420	NA	NA	3.6779	2.97409e-12	UP
AT3G47040	NA	NA	3.67342	5.15442e-12	UP
AT4G31950	NA	NA	3.66996	0.000857368	UP
AT5G24200	NA	NA	3.65186	7.46631e-53	UP
AT5G43570	NA	NA	3.64992	0.0124229	UP
AT1G19250	FMO1	FMO1 is required for full expression of TIR-NB-LRRconditioned resistance to avirulent pathogens and for basal resistance to invasive virulent pathogens. Functions in an EDS1-regulated but SA-independent mechanism that promotes resistance and cell death at pathogen infection sites.	3.64654	5.29365e-56	UP
AT5G20940	NA	NA	3.63416	8.04848e-44	UP
AT1G71520	NA	encodes a member of the DREB subfamily A-5 of ERF/AP2 transcription factor family. The protein contains one AP2 domain. There are 16 members in this subfamily including RAP2.1, RAP2.9 and RAP2.10.	3.63288	0.000933796	UP
AT2G38940	ATPT2	Encodes Pht1;4, a member of the Pht1 family of phosphate transporters which include: Pht1;1/At5g43350, Pht1;2/At5g43370, Pht1;3/At5g43360, Pht1;4/At2g38940, Pht1;5/At2g32830, Pht1;6/At5g43340, Pht1;7/At3g54700, Pht1;8/At1g20860, Pht1;9/At1g76430 (Plant Journal 2002, 31:341).	3.63218	1.16812e-98	UP
AT1G29640	NA	NA	3.62973	1.43561e-14	UP
AT4G13660	ATPRR2	Encodes a pinoresinol reductase involved in lignan biosynthesis. Expressed strongly in roots and less strongly in stems. Shows preference for pinoresinol and not lariciresinol.	3.62729	3.07291e-36	UP
AT1G30850	RSH4	NA	3.62259	3.5956e-21	UP
AT1G68630	NA	NA	3.60678	6.26295e-06	UP
AT4G34210	ASK11	one of 20 SKP1 homologs in Arabidopsis. Protein is most similar to ASK12 and RNAi lines show defects in stamen development.	3.60505	0.0463994	UP
AT5G24860	ATFPF1	encodes a small protein of 12.6 kDa that regulates flowering and is involved in gibberellin signalling pathway. It is expressed in apical meristems immediately after the photoperiodic induction of flowering. Genetic interactions with flowering time and floral organ identity genes suggest that this gene may be involved in modulating the competence to flower. There are two other genes similar to FP…	3.60457	0.0358627	UP
AT1G76430	PHT1;9	Encodes Pht1;9, a member of the Pht1 family of phosphate transporters which include: Pht1;1/At5g43350, Pht1;2/At5g43370, Pht1;3/At5g43360, Pht1;4/At2g38940, Pht1;5/At2g32830, Pht1;6/At5g43340, Pht1;7/At3g54700, Pht1;8/At1g20860, Pht1;9/At1g76430 (Plant Journal 2002, 31:341).	3.60441	0.037198	UP
AT2G28340	NA	NA	3.60379	0.0327902	UP
AT3G47420	AtG3Pp1	Encodes a Pi starvation-responsive protein AtPS3.	3.59758	8.7801e-84	UP
AT1G60130	NA	NA	3.5925	0.00144775	UP
AT1G29090	NA	NA	3.59203	1.71826e-08	UP
AT4G05030	NA	NA	3.59185	3.82279e-11	UP
AT2G46830	AtCCA1	Encodes a transcriptional repressor that performs overlapping functions with LHY in a regulatory feedback loop that is closely associated with the circadian oscillator of Arabidopsis. Binds to the evening element in the promoter of TOC1 and represses TOC1 transcription. CCA1 and LHY colocalize in the nucleus and form heterodimers in vivo. CCA1 and LHY function synergistically in regulating circad…	3.58917	2.53353e-42	UP
AT4G37150	ATMES9	Encodes a protein shown to have carboxylesterase activity, methyl salicylate esterase activity, methyl jasmonate esterase activity, and methyl IAA esterase activity in vitro. MES9 appears to be involved in MeSA hydrolysis in planta. Expression of MES9 can restore systemic acquired resistance in SAR-deficient tobacco plants. This protein does not act on MeGA4, or MEGA9 in vitro.	3.56544	2.03212e-13	UP
AT5G09470	DIC3	Encodes one of the mitochondrial dicarboxylate carriers (DIC): DIC1 (AT2G22500), DIC2 (AT4G24570), DIC3 (AT5G09470).	3.54014	1.12956e-16	UP
AT2G37770	AKR4C9	NA	3.53352	8.62249e-08	UP
AT2G15340	NA	NA	3.53099	0.000298154	UP
AT1G66860	NA	NA	3.53085	0.00819773	UP
AT1G15415	NA	The protein encoded by this gene was identified as a part of pollen proteome by mass spec analysis. It has weak homology to LEA (late embryo abundant) proteins. Encodes protein phosphatase 2A (PP2A) B'gamma subunit. Targeted to nucleus and cytosol.	3.53029	3.39876e-05	UP
AT5G41610	ATCHX18	member of Putative Na+/H+ antiporter family	3.52207	5.40873e-42	UP
AT1G32960	ATSBT3.3	NA	3.5144	1.95729e-10	UP
AT4G37520	NA	NA	3.48993	2.62283e-34	UP
AT2G31250	HEMA3	NA	3.48912	0.0483527	UP
AT4G39360	NA	NA	3.48854	0.0446065	UP
AT2G07696	NA	NA	3.48853	0.0410145	UP
AT2G07779	NA	NA	3.48853	0.0410145	UP
AT3G04070	ANAC047	NA	3.48151	1.47963e-08	UP
AT4G11480	NA	NA	3.48082	3.31292e-07	UP
AT3G03385	NA	NA	3.46744	0.0121387	UP
AT4G28790	NA	NA	3.46736	4.51078e-10	UP
AT3G13500	NA	NA	3.46734	0.00376362	UP
AT5G56510	APUM12	Encodes a member of the Arabidopsis Pumilio (APUM) proteins containing PUF domain (eight repeats of approximately 36 amino acids each). PUF proteins regulate both mRNA stability and translation through sequence-specific binding to the 3' UTR of target mRNA transcripts.	3.46715	0.000502011	UP
AT3G05400	NA	NA	3.45305	1.08574e-05	UP
AT5G24090	ATCHIA	Chitinase A (class III) expressed exclusively under environmental stress conditions.	3.45204	8.05596e-24	UP
AT3G22910	ACA13	NA	3.45191	1.561e-14	UP
AT2G29350	SAG13	senescence-associated gene SAG13 encoding a short-chain alcohol dehydrogenase	3.44909	6.42832e-35	UP
AT2G27389	NA	NA	3.4456	0.00368784	UP
AT1G55775	NA	NA	3.43358	2.51968e-16	UP
AT3G50130	NA	NA	3.43294	0.000655199	UP
AT1G32940	AtSBT3.5	NA	3.42967	7.64352e-54	UP
AT4G37160	sks15	NA	3.42321	0.00497884	UP
AT3G60420	NA	NA	3.42117	0.00374962	UP
AT2G30670	NA	NA	3.4008	0.0196763	UP
AT1G04427	NA	NA	3.39865	0.0317462	UP
AT4G12580	NA	NA	3.38564	0.000137361	UP
AT3G19390	NA	NA	3.3772	8.10481e-05	UP
AT1G61110	anac025	NA	3.37635	0.00470489	UP
AT3G12500	ATHCHIB	encodes a basic chitinase involved in ethylene/jasmonic acid mediated signalling pathway during systemic acquired resistance based on expression analyses.	3.3656	2.87233e-32	UP
AT3G22840	ELIP	Encodes an early light-inducible protein.	3.35499	2.08465e-11	UP
AT2G46670	NA	NA	3.35401	0.00078318	UP
AT3G47540	NA	NA	3.35262	8.79339e-48	UP
AT3G46080	NA	NA	3.35138	1.60899e-10	UP
AT2G28110	FRA8	Homolog to AT5G22940, a member of glycosyltransferase family 47 that is involved in secondary cell wall biosynthesis. It exhibits high sequence similarity to tobacco (Nicotiana plumbaginifolia) pectin glucuronyltransferase. Protein has a domain that shares significant similarity with the pfam03016 domain. It is expressed specifically in developing vessels and fiber cells, and FRA8 is targeted to …	3.34513	2.37737e-29	UP
AT2G46680	ATHB-7	encodes a putative transcription factor that contains a homeodomain closely linked to a leucine zipper motif. Transcript is detected in all tissues examined. Is transcriptionally regulated in an ABA-dependent manner and may act in a signal transduction pathway which mediates a drought response.	3.34449	7.92587e-31	UP
AT2G23110	NA	NA	3.34351	2.03402e-11	UP
AT3G61890	ATHB-12	Encodes a homeodomain leucine zipper class I (HD-Zip I) protein. Loss of function mutant has abnormally shaped leaves and stems.	3.34297	1.42632e-26	UP
AT1G51820	SIF4	NA	3.34026	8.98019e-22	UP
AT1G66570	ATSUC7	NA	3.33863	2.54071e-13	UP
AT5G34940	AtGUS3	The protein is predicted (WoLF PSORT program) to be membrane-associated.	3.33778	4.36961e-90	UP
AT1G61080	NA	NA	3.33694	2.46097e-24	UP
AT2G04160	AIR3	isolated from differential screening of a cDNA library from auxin-treated root culture. encodes a protein similar to subtilisin-like serine protease which is believed to be active outside the plant cell.	3.33442	7.57959e-201	UP
AT3G18250	NA	NA	3.33015	6.86622e-11	UP
AT1G73010	AtPPsPase1	NA	3.32998	1.30224e-10	UP
AT3G16900	NA	NA	3.32994	0.0173329	UP
AT4G01350	NA	NA	3.32904	0.00351	UP
AT2G35300	AtLEA4-2	NA	3.32857	0.00113637	UP
AT1G68150	ATWRKY9	member of WRKY Transcription Factor; Group II-b	3.32797	0.00887075	UP
AT3G09270	ATGSTU8	Encodes glutathione transferase belonging to the tau class of GSTs. Naming convention according to Wagner et al. (2002).	3.32759	1.04087e-30	UP
AT3G61900	SAUR33	NA	3.32759	0.00383633	UP
AT1G15040	GAT	NA	3.32753	0.0306947	UP
AT5G48410	ATGLR1.3	member of Putative ligand-gated ion channel subunit family	3.32466	1.85826e-17	UP
AT1G74010	NA	NA	3.32116	3.67624e-24	UP
AT3G17790	ATACP5	NA	3.31437	8.92995e-33	UP
AT5G17300	RVE1	Myb-like transcription factor that regulates hypocotyl growth by regulating free auxin levels in a time-of-day specific manner.	3.30838	6.7784e-14	UP
AT5G10625	NA	NA	3.30749	0.00274834	UP
AT3G60120	BGLU27	NA	3.30157	1.78158e-19	UP
AT5G67310	CYP81G1	member of CYP81G	3.30059	1.97615e-26	UP
AT3G21080	NA	NA	3.29994	3.4147e-32	UP
AT5G23950	NA	NA	3.29652	1.37766e-06	UP
AT1G01480	ACS2	a member of the 1-aminocyclopropane-1-carboxylate (ACC) synthase (S-adenosyl-L-methionine methylthioadenosine-lyase, EC 4.4.1.14) gene family, isolated from a flower-specific cDNA library.	3.28425	3.69782e-16	UP
AT3G03480	CHAT	NA	3.28244	6.89298e-20	UP
AT5G54165	NA	NA	3.28221	1.80856e-08	UP
AT1G64940	NA	NA	3.28138	0.00538828	UP
AT4G06935	NA	NA	3.28115	0.0102975	UP
AT2G33130	RALF18	Member of a diversely expressed predicted peptide family showing sequence similarity to tobacco Rapid Alkalinization Factor (RALF), and is believed to play an essential role in the physiology of Arabidopsis. Consists of a single exon and is characterized by a conserved C-terminal motif and N-terminal signal peptide.	3.27961	0.00455911	UP
AT1G02430	ARFD1B	A member of ARF GTPase family. A thaliana has 21 members of this family, known to be essential for vesicle coating and uncoating and functions in GTP-binding. Gene encoding ADP-ribosylation factor and similar to other ARFs and ARF-like proteins.	3.27929	1.40741e-08	UP
AT2G43620	NA	NA	3.2757	1.08361e-114	UP
AT1G02520	ABCB11	NA	3.26944	3.91344e-18	UP
AT3G19270	CYP707A4	Encodes a protein with ABA 8'-hydroxylase activity, involved in ABA catabolism. Member of the CYP707A gene family.	3.26683	4.1542e-24	UP
AT2G44450	BGLU15	NA	3.26377	9.11729e-07	UP
AT2G41250	NA	NA	3.26334	3.66075e-90	UP
AT1G49960	NA	NA	3.25395	0.0256331	UP
AT5G52720	NA	NA	3.25262	6.66186e-16	UP
AT5G48400	ATGLR1.2	member of Putative ligand-gated ion channel subunit family	3.2513	3.56233e-39	UP
AT2G37440	NA	NA	3.24987	3.16432e-12	UP
AT1G64500	NA	NA	3.24665	1.13776e-78	UP
AT2G34500	CYP710A1	Encodes a protein with C22-sterol desaturase activity. The enzyme was shown to catalyze in the presence of NADPH the conversion of &beta;-sitosterol to stigmasterol, but not that of 24-<i>epi</i>-campesterol to brassicasterol (unlike CYP710A2).	3.23736	2.5011e-24	UP
AT3G16330	NA	NA	3.22988	5.36131e-13	UP
AT5G38350	NA	NA	3.22626	7.40115e-10	UP
AT2G17740	VLG	NA	3.21002	2.71371e-38	UP
AT2G38250	NA	NA	3.20848	3.34343e-30	UP
AT1G68620	NA	NA	3.20352	2.66093e-28	UP
AT2G45210	SAG201	NA	3.20149	6.65688e-15	UP
AT5G01550	LecRK-VI.3	Encodes LecRKA4.2, a member of the lectin receptor kinase subfamily A4 (LecRKA4.1 At5g01540; LecRKA4.2 At5g01550; LecRKA4.3 At5g01560). Together with other members of the subfamily, functions redundantly in the negative regulation of ABA response in seed germination.	3.19602	5.25421e-33	UP
AT4G22680	AtMYB85	Encodes a putative transcription factor (MYB85).	3.19329	8.92327e-21	UP
AT2G25090	AtCIPK16	Encodes a member of the SNF1-related kinase (SnRK) gene family (SnRK3.18), which has also been reported as a member of the CBL-interacting protein kinases (CIPK16).	3.17759	1.13166e-09	UP
AT1G60740	NA	NA	3.17734	0.027724	UP
AT3G61035	NA	NA	3.17678	0.00752974	UP
AT2G26400	ARD	Encodes a protein predicted to belong to the acireductone dioxygenase (ARD/ARD)family.	3.17418	3.93031e-09	UP
AT4G19460	NA	NA	3.16976	3.25868e-09	UP
AT5G01300	NA	NA	3.16782	1.83793e-10	UP
AT1G65730	YSL7	Arabidopsis thaliana metal-nicotianamine transporter YSL4	3.16416	2.40231e-30	UP
AT5G38780	NA	NA	3.16112	2.14517e-08	UP
AT2G33380	AtCLO3	Encodes a calcium binding protein whose mRNA is induced upon treatment with NaCl, ABA and in response to dessication. mRNA expression under drought conditions is apparent particularly in leaves and flowers. Isoform of caleosin with a role as a peroxygenase involved in oxylipin metabolism during biotic and abiotic stress.	3.15746	2.53805e-06	UP
AT5G63225	NA	NA	3.15666	3.1336e-15	UP
AT4G35170	CC4	NA	3.15288	7.39522e-18	UP
AT1G74140	NA	NA	3.15282	4.93155e-13	UP
AT5G13320	AtGH3.12	Encodes an enzyme capable of conjugating amino acids to 4-substituted benzoates. 4-HBA (4-hydroxybenzoic acid) and pABA (4-aminobenzoate) may be targets of the enzyme in Arabidopsis, leading to the production of pABA-Glu, 4HBA-Glu, or other related compounds. This enzyme is involved in disease-resistance signaling. It is required for the accumulation of salicylic acid, activation of defense respo…	3.15128	1.13639e-10	UP
AT1G07400	NA	NA	3.15089	3.21423e-08	UP
AT2G33020	AtRLP24	NA	3.14883	2.21837e-21	UP
AT1G76930	ATEXT1	Encodes an Arabidopsis extensin gene that belongs to cell-wall hydroxyproline-rich glycoproteins. The cross-link of extensins enforces cell wall strength. Transgenic plants overexpressing this gene show an increase in stem thickness.	3.14273	2.22484e-38	UP
AT3G48850	MPT2	NA	3.14199	5.69113e-33	UP
AT4G37010	CEN2	Encodes a member of the Centrin family. Mutants are hypersensitive to UV and prone to UV induced DNA damage. Based on sequence similarity and mutant phenotype CEN2 is thought to be involved in nucelotide excision repair/DNA repair.	3.14076	4.71989e-52	UP
AT5G13490	AAC2	Encodes mitochondrial ADP/ATP carrier	3.13962	1.03528e-41	UP
AT1G23040	NA	NA	3.13247	2.57909e-30	UP
AT4G12470	AZI1	Encodes AZI1 (AZELAIC ACID INDUCED 1). Involved in the priming of salicylic acid induction and systemic immunity triggered by pathogen or azelaic acid.	3.13175	2.84678e-91	UP
AT2G37760	AKR4C8	NA	3.13025	7.55178e-29	UP
AT1G44800	SIAR1	NA	3.12719	8.18495e-10	UP
AT3G16450	JAL33	NA	3.12348	0.0112374	UP
AT1G70690	HWI1	Encodes a plasmodesmal protein that may be involved in the intercellular movement of molecules through the plasmodesmata. The protein has two DUF26 domains and a single transmembrane domain.	3.12195	9.87428e-29	UP
AT3G09600	LCL5	NA	3.12017	5.68472e-38	UP
AT5G53290	CRF3	encodes a member of the ERF (ethylene response factor) subfamily B-5 of ERF/AP2 transcription factor family. The protein contains one AP2 domain. There are 7 members in this subfamily.	3.11765	8.76405e-21	UP
AT4G37530	NA	NA	3.1155	2.53084e-10	UP
AT4G18980	AtS40-3	Encodes a nuclear-targeted protein AtS40-3 that modulates senescence associated gene expression.	3.11531	4.72116e-07	UP
AT1G69930	ATGSTU11	Encodes glutathione transferase belonging to the tau class of GSTs. Naming convention according to Wagner et al. (2002).	3.11425	2.86848e-21	UP
AT1G32350	AOX1D	NA	3.11229	2.17993e-06	UP
AT2G04450	ATNUDT6	Encodes a protein with NADH pyrophosphatase activity. Although this protein was also shown to have ADP-ribose diphosphatase activity in vitro, mutant analyses suggest that NUDX6 is involved in NADH metabolism in vivo.	3.10988	2.72622e-67	UP
AT5G39090	NA	NA	3.10719	2.03734e-18	UP
AT5G53320	NA	NA	3.10625	2.28024e-06	UP
AT4G13000	NA	NA	3.10087	1.15421e-11	UP
AT4G37430	CYP81F1	Encodes a member of the CYP81F cytochrome P450 monooxygenase subfamily.	3.10024	2.66522e-73	UP
AT4G28340	NA	NA	3.09599	0.0288492	UP
AT5G66280	GMD1	GDP-D-mannose 4,6-dehydratase	3.09551	0.00332033	UP
AT2G21187	NA	NA	3.09465	1.01474e-11	UP
AT5G59520	AtZIP2	encodes a metal ion transporter whose expression is regulated by copper.	3.09406	5.01564e-06	UP
AT2G01818	NA	NA	3.08606	1.03772e-05	UP
AT2G08650	NA	NA	3.08108	3.78763e-07	UP
AT4G19810	ChiC	NA	3.06951	3.54988e-24	UP
AT1G13300	AtNIGT1	Overexpression confers hypersensitivity to low phosphate-elicited inhibition of primary root growth.	3.06578	0.010701	UP
AT5G17330	AtGAD1	Encodes one of two isoforms of glutamate decarboxylase.	3.06561	6.3085e-41	UP
AT3G53230	AtCDC48B	NA	3.06556	7.44876e-56	UP
AT2G44790	UCC2	Encodes a uclacyanin, a protein precursor that is closely related to precursors of stellacyanins and a blue copper protein from pea pods.	3.06298	1.06632e-23	UP
AT4G11170	RMG1	NA	3.05327	1.55306e-17	UP
AT2G38240	JAO4	NA	3.05105	0.000594961	UP
AT4G19970	NA	NA	3.05014	5.60347e-26	UP
AT3G46230	ATHSP17.4	member of the class I small heat-shock protein (sHSP) family, which accounts for the majority of sHSPs in maturing seeds	3.04785	0.000244818	UP
AT4G30270	MERI-5	encodes a protein similar to endo xyloglucan transferase in sequence. It is also very similar to BRU1 in soybean, which is involved in brassinosteroid response.	3.04116	5.76975e-29	UP
AT3G03470	CYP89A9	member of CYP89A	3.03741	3.58095e-57	UP
AT2G46790	APRR9	Pseudo-response regulator PRR9. Involved in clock function. PRR7 and PRR9 are partially redundant essential components of a temperature-sensitive circadian system. CCA1 and LHY had a positive effect on PRR9. Interact with TOC1 in a yeast two-hybrid assay. Acts as transcriptional repressor of CCA1 and LHY.	3.03265	3.48936e-71	UP
AT2G15020	NA	NA	3.02443	1.37109e-20	UP
AT5G12030	AT-HSP17.6A	Encodes a cytosolic small heat shock protein with chaperone activity that is induced by heat and osmotic stress and is also expressed late in seed development.	3.02223	6.40279e-06	UP
AT4G02280	ATSUS3	Encodes a protein with sucrose synthase activity (SUS3). It appears to be important for sucrose metabolism in developing seeds, especially during the late maturation phase, about 18 days after flowering.	3.02193	3.5359e-63	UP
AT5G57550	XTH25	xyloglucan endotransglycosylase-related protein (XTR3)	3.02005	2.22298e-41	UP
AT5G21150	AGO9	AGO9-dependent sRNA silencing is crucial to specify cell fate in the Arabidopsis ovule. AGO9 is expressed in reproductive companion cells but not in the associated male or female gametes or their precursors. Therefore, AGO9 acts non-cell autonomously to silencing the activity of TEs activity in the female gametophyte.	3.00776	0.0490809	UP
AT1G03800	ATERF10	encodes a member of the ERF (ethylene response factor) subfamily B-1 of ERF/AP2 transcription factor family (ATERF-10). The protein contains one AP2 domain. There are 15 members in this subfamily including ATERF-3, ATERF-4, ATERF-7, and leafy petiole.	3.00731	0.0401756	UP
AT2G35070	NA	NA	3.00534	1.8507e-15	UP
AT5G56050	NA	NA	3.00441	5.72641e-23	UP
AT5G41040	ASFT	Encodes a feruloyl-CoA transferase required for suberin synthesis. Has feruloyl-CoA-dependent feruloyl transferase activity towards substrates with a primary alcohol.	3.00273	1.14269e-16	UP
AT2G39200	ATMLO12	A member of a large family of seven-transmembrane domain proteins specific to plants, homologs of the barley mildew resistance locus o (MLO) protein. The Arabidopsis genome contains 15 genes encoding MLO proteins, with localization in plasma membrane. Phylogenetic analysis revealed four clades of closely-related AtMLO genes. ATMLO6 belongs to the clade IV, with AtMLO2, AtMLO3 and AtMLO12. The gen…	3.00251	5.48752e-29	UP
AT4G15248	BBX30	NA	2.99523	3.22149e-07	UP
AT4G01430	UMAMIT29	NA	2.99398	6.49881e-20	UP
AT1G10585	NA	NA	2.99382	2.87063e-15	UP
AT1G43910	NA	NA	2.98852	1.94634e-74	UP
AT3G49580	LSU1	NA	2.98471	1.48869e-17	UP
AT2G44010	NA	NA	2.9838	3.6425e-06	UP
AT5G59220	HAI1	NA	2.9809	0.000406671	UP
AT5G15850	ATCOL1	Homologous to the flowering-time gene CONSTANS.	2.97563	6.20335e-84	UP
AT2G35980	ATNHL10	Encodes a protein whose sequence is similar to tobacco hairpin-induced gene (HIN1) and Arabidopsis non-race specific disease resistance gene (NDR1). Expression of this gene is induced by cucumber mosaic virus, spermine and during senescence. The gene product is localized to the chloroplast.	2.97519	3.34835e-10	UP
AT5G02780	GSTL1	Encodes a member of the lambda family of glutathione transferases. It has thiol transferase activity and self S-glutathionylation activity in vitro.	2.97456	5.98337e-07	UP
AT5G21960	NA	encodes a member of the DREB subfamily A-5 of ERF/AP2 transcription factor family. The protein contains one AP2 domain. There are 15 members in this subfamily including RAP2.1, RAP2.9 and RAP2.10.	2.9732	1.44699e-05	UP
AT3G22240	AthCYSTM9	NA	2.96873	2.13034e-14	UP
AT5G65500	NA	NA	2.96228	5.03503e-05	UP
AT3G17609	HYH	Encodes a homolog of HY5 (HYH). Involved in phyB signaling pathway.	2.96168	8.3343e-55	UP
AT2G02850	ARPN	Encodes plantacyanin one of blue copper proteins. Involved in anther development and pollination. Expressed in the transmitting tract of the pistil.	2.95783	2.63322e-21	UP
AT3G24982	ATRLP40	NA	2.95769	0.000706278	UP
AT2G31945	NA	NA	2.95535	3.11203e-05	UP
AT4G21120	AAT1	Encodes a member of the cationic amino acid transporter (CAT) subfamily of amino acid polyamine choline transporters. Mediates efficient uptake of Lys, Arg and Glu in a yeast system.	2.95529	7.4156e-30	UP
AT1G68440	NA	NA	2.95336	1.91761e-54	UP
AT5G22860	NA	NA	2.94741	1.16048e-46	UP
AT3G48240	NA	NA	2.94695	0.0170429	UP
AT5G01900	ATWRKY62	member of WRKY Transcription Factor; Group III	2.94235	5.35693e-17	UP
AT4G15417	ATRTL1	NA	2.94141	1.50843e-15	UP
AT1G53625	NA	NA	2.94091	2.98519e-21	UP
AT4G23210	CRK13	Encodes a Cysteine-rich receptor-like kinase (CRK13). Overexpression of CRK13 leads to hypersensitive response cell death, and induces defense against pathogens by causing increased accumulation of salicylic acid.	2.93891	3.99509e-34	UP
AT1G55230	NA	NA	2.93856	0.000134906	UP
AT1G57570	NA	NA	2.93342	1.7481e-05	UP
AT4G16920	NA	NA	2.92775	9.65226e-18	UP
AT5G24150	SQE5	squalene monooxygenase gene homolog	2.92773	5.50241e-101	UP
AT3G45410	LecRK-I.3	encodes a receptor-like kinase that has serine/threonine kinase activity whose expression is induced by high salt stress. This induction is inhibited by tobacco ethylene receptor.	2.922	4.45242e-26	UP
AT4G15530	PPDK	The product of this long transcript was shown to be targeted to the chloroplast, whereas the shorter transcript (no targeting sequence) accumulates in the cytosol. They were also found in slightly different tissues.	2.91579	1.1809e-47	UP
AT1G57560	AtMYB50	Member of the R2R3 factor gene family.	2.91552	5.28783e-30	UP
AT1G65483	NA	NA	2.91537	1.20018e-19	UP
AT3G61270	NA	NA	2.91438	0.00451362	UP
AT5G43180	NA	NA	2.91367	0.000203192	UP
AT1G63530	NA	NA	2.91337	2.73495e-14	UP
AT3G59930	NA	NA	2.91107	5.87176e-22	UP
AT2G13810	ALD1	NA	2.90922	7.84641e-29	UP
AT4G08770	Prx37	NA	2.90112	4.48406e-30	UP
AT5G44380	AtBBE28	NA	2.89932	1.04727e-19	UP
AT5G25260	flot2	NA	2.89425	2.14423e-29	UP
AT4G23700	ATCHX17	member of Putative Na+/H+ antiporter family	2.88955	4.81792e-10	UP
AT4G07190	NA	NA	2.88359	0.0192641	UP
AT1G53540	NA	NA	2.88161	0.00390221	UP
AT1G52810	NA	NA	2.88099	0.0199813	UP
AT1G23800	ALDH2B	Encodes a mitochondrial aldehyde dehydrogenase; nuclear gene for mitochondrial product.	2.87299	2.91908e-76	UP
AT3G47050	NA	NA	2.86977	6.67868e-27	UP
AT3G01970	ATWRKY45	member of WRKY Transcription Factor; Group I	2.86893	6.44488e-24	UP
AT2G32830	PHT1;5	Encodes Pht1;5, a member of the Pht1 family of phosphate transporters which include: Pht1;1/At5g43350, Pht1;2/At5g43370, Pht1;3/At5g43360, Pht1;4/At2g38940, Pht1;5/At2g32830, Pht1;6/At5g43340, Pht1;7/At3g54700, Pht1;8/At1g20860, Pht1;9/At1g76430 (Plant Journal 2002, 31:341).	2.86764	1.14979e-11	UP
AT2G33070	ATNSP2	Encodes a nitrile-specifier protein NSP2. NSP2 is one out of five (At3g16400/NSP1, At2g33070/NSP2, At3g16390/NSP3, At3g16410/NSP4 and At5g48180/NSP5) A. thaliana epithiospecifier protein (ESP) homologues that promote simple nitrile, but not epithionitrile or thiocyanate formation.	2.86442	0.0121264	UP
AT3G61390	NA	NA	2.86342	2.84962e-10	UP
AT1G79900	ATMBAC2	encodes a mitochondrial ornithine transporter that exports ornithine from the mitochondria to the cytosol	2.86075	4.71398e-07	UP
AT2G44370	NA	NA	2.85712	3.4754e-20	UP
AT1G53620	NA	NA	2.85662	4.75935e-20	UP
AT3G09450	NA	NA	2.85523	5.21132e-10	UP
AT4G22070	ATWRKY31	member of WRKY Transcription Factor; Group II-b	2.85021	4.19319e-28	UP
AT1G01680	ATPUB54	NA	2.84794	2.96524e-28	UP
AT3G12320	LNK3	NA	2.84394	1.44866e-42	UP
AT1G08630	THA1	Encodes a threonine aldolase, involved in threonine degradation to glycine. Primarily expressed in seeds and seedlings.	2.84274	2.23654e-09	UP
AT5G40510	NA	NA	2.84019	0.00090564	UP
AT5G19880	NA	NA	2.83434	7.69347e-19	UP
AT1G17170	ATGSTU24	Encodes glutathione transferase belonging to the tau class of GSTs. Naming convention according to Wagner et al. (2002).	2.8294	2.69809e-14	UP
AT5G65090	BST1	Encodes a protein involved in root hair morphogenesis and tip growth. Required for restricting both the size of the root-hair initiation site and the width of the root hairs during the transition to tip growth, but, apparently, is not required for normal subsequent tip growth.	2.8187	7.17352e-25	UP
AT5G40040	NA	NA	2.81678	0.034952	UP
AT1G54890	NA	NA	2.8163	0.0219805	UP
AT3G06890	NA	NA	2.81513	1.00176e-28	UP
AT1G35515	MYB8	Encodes a nuclear localized R2R3-type MYB transcription factor that is involved in responses to abiotic stress including cold acclimation,osmotic and salt stress.Mutants are sensitive to salt, freezing and osmotic stress.	2.81486	0.0419707	UP
AT1G36640	NA	NA	2.81405	0.0220867	UP
AT5G41730	NA	NA	2.81347	1.7325e-05	UP
AT1G47510	5PTASE11	Encodes a phosphatidylinositol polyphosphate 5-phosphatase. It can dephosphorylate PI(4,5)P2, PI(3,5)P2, and PI(3,4,5)P3, but, it is not active against PI(5)P or the water soluble inositol(1,4,5)P3 or inositol(1,3,4,5)P4. The transcript levels for this gene rise in response to auxin, ABA, and JA.	2.81334	0.000209808	UP
AT5G44575	NA	NA	2.80868	1.51205e-42	UP
AT1G23730	ATBCA3	NA	2.80472	1.13751e-29	UP
AT3G48640	NA	NA	2.80161	2.16789e-16	UP
AT1G08173	NA	NA	2.79872	3.08789e-10	UP
AT5G06230	TBL9	Encodes a member of the TBL (TRICHOME BIREFRINGENCE-LIKE) gene family containing a plant-specific DUF231 (domain of unknown function) domain. TBL gene family has 46 members, two of which (TBR/AT5G06700 and TBL3/AT5G01360) have been shown to be involved in the synthesis and deposition of secondary wall cellulose, presumably by influencing the esterification state of pectic polymers. A nomenclature…	2.79844	6.26704e-16	UP
AT2G43140	bHLH129	NA	2.797	3.41323e-10	UP
AT3G15300	MVQ4	NA	2.79503	3.65976e-19	UP
AT3G48020	NA	NA	2.7936	1.82065e-23	UP
AT1G33730	NA	NA	2.79265	9.56897e-21	UP
AT3G46690	NA	NA	2.78878	6.861e-23	UP
AT3G20340	NA	Expression of the gene is downregulated in the presence of paraquat, an inducer of photoxidative stress.	2.78339	2.26932e-05	UP
AT5G03610	NA	NA	2.78233	2.11085e-33	UP
AT3G51540	NA	NA	2.77938	0.010948	UP
AT3G56891	NA	NA	2.77907	0.00307394	UP
AT2G43580	NA	NA	2.77312	1.50812e-11	UP
AT5G64080	AtXYP1	NA	2.77275	5.53951e-32	UP
AT2G36690	GAS2	NA	2.77252	8.81536e-32	UP
AT3G53040	NA	NA	2.77236	0.0121855	UP
AT5G59320	LTP3	Predicted to encode a PR (pathogenesis-related) protein. Belongs to the lipid transfer protein (PR-14) family with the following members: At2g38540/LTP1, At2g38530/LTP2, At5g59320/LTP3, At5g59310/LTP4, At3g51600/LTP5, At3g08770/LTP6, At2g15050/LTP7, At2g18370/LTP8, At2g15325/LTP9, At5g01870/LTP10, At4g33355/LTP11, At3g51590/LTP12, At5g44265/LTP13, At5g62065/LTP14, At4g08530/LTP15.	2.7711	4.62618e-21	UP
AT1G63245	CLE14	Member of a large family of putative ligands homologous to the Clavata3 gene. Consists of a single exon. Can not replace CLV3 function in vivo.	2.76901	2.55374e-12	UP
AT5G62150	NA	NA	2.76462	1.03164e-19	UP
AT2G22850	AtbZIP6	NA	2.76258	0.0106136	UP
AT3G61198	NA	NA	2.76057	1.71212e-25	UP
AT5G13330	Rap2.6L	encodes a member of the ERF (ethylene response factor) subfamily B-4 of ERF/AP2 transcription factor family. The protein contains one AP2 domain. There are 7 members in this subfamily.	2.75982	1.01738e-15	UP
AT1G16420	ATMC8	Encodes a metacaspase (cysteine-type endopeptidase) that is involved in promoting programmed cell death in response to hydrogen peroxide (H2O2), UV light, and methyl viologen (MV). Transcript levels rise in response to UV-C, H2O2, and MV. In vitro assays demonstrate that this enzyme has a preference for cleaving after an arginine residue, and it has a pH optimum of 8.0.	2.75966	9.3469e-14	UP
AT4G11910	NYE2	NA	2.75716	1.54135e-16	UP
AT5G15830	AtbZIP3	NA	2.75709	4.9423e-08	UP
AT4G09685	NA	NA	2.75708	0.0209236	UP
AT1G35230	AGP5	Encodes arabinogalactan-protein (AGP5).	2.75472	2.53834e-32	UP
AT5G54130	NA	NA	2.75375	1.20609e-23	UP
AT3G49120	ATPCB	Class III peroxidase Perx34. Expressed in roots, leaves and stems. Located in the cell wall. Involved in cell elongation. Expression activated by light. May play a role in generating H2O2 during defense response.	2.75261	9.84915e-37	UP
AT1G61120	GES	Encodes a geranyllinalool synthase that produces a precursor to TMTT, a volatile plant defense C16-homoterpene. GES transcript levels rise in response to alamethicin, a fungal peptide mixture that damages membranes. This transcriptional response is blocked in JA biosynthetic and JA signaling mutants, but GES transcript levels still rise in response to alamethicin in mutants with salicylic acid an…	2.74431	0.00046739	UP
AT3G22600	LTPG5	NA	2.74316	6.51096e-23	UP
AT5G44480	DUR	mutant has Altered lateral root; UDP Glucose Epimerase	2.73546	8.0824e-20	UP
AT2G14610	AtCAPE9	PR1 gene expression is induced in response to a variety of pathogens. It is a useful molecular marker for the SAR response. Though the Genbank record for the cDNA associated to this gene is called 'PR-1-like', the sequence actually corresponds to PR1. Expression of this gene is salicylic-acid responsive.	2.73464	1.36564e-26	UP
AT5G44574	NA	NA	2.73283	6.97712e-06	UP
AT1G61800	ATGPT2	glucose6-Phosphate/phosphate transporter 2	2.73228	3.87883e-26	UP
AT5G48540	NA	NA	2.72963	5.53147e-24	UP
AT1G15520	ABCG40	ABC transporter family involved in ABA transport and resistance to lead. Localizes to plasma membrane. Upregulated by lead. Expressed in leaves, flowers, stomata and roots.	2.72459	1.11703e-10	UP
AT3G52310	ABCG27	NA	2.72099	4.95499e-06	UP
AT4G26200	ACCS7	Member of a family of proteins in Arabidopsis that encode 1-Amino-cyclopropane-1-carboxylate synthase, an enzyme involved in ethylene biosynthesis. Not expressed in response to IAA.	2.72019	0.000212442	UP
AT2G15760	NA	NA	2.71935	4.67669e-28	UP
AT1G72540	NA	NA	2.7178	2.83889e-28	UP
AT3G61190	BAP1	Encodes a protein with a C2 domain that binds to BON1 in yeast two hybrid analyses. Its ability to bind to phospholipids is enhanced by calcium ions. Involved in maintaining cell homeostasis.	2.717	4.04997e-22	UP
AT5G14760	AO	At5g14760 encodes for L-aspartate oxidase involved in the early steps of NAD biosynthesis. In contrary to the EC 1.4.3.16 (l-aspartate oxidase - deaminating) the enzyme catalyzes the reaction L-aspartate + O2 = iminoaspartate (alpha-iminosuccinate) + H2O2	2.71182	2.92844e-39	UP
AT2G36695	NA	NA	2.70729	0.0203301	UP
AT3G29250	AtSDR4	NA	2.702	2.13665e-27	UP
AT5G52730	NA	NA	2.69944	3.82345e-07	UP
AT1G09560	GLP5	germin-like protein (GLP5)	2.69823	8.58271e-37	UP
AT1G56650	ATMYB75	Encodes a putative MYB domain containing transcription factor involved in anthocyanin metabolism and radical scavenging. Essential for the sucrose-mediated expression of the dihydroflavonol reductase gene.	2.69795	3.06464e-07	UP
AT5G67080	MAPKKK19	member of MEKK subfamily	2.6969	7.05575e-11	UP
AT1G72760	NA	NA	2.69588	0.00015715	UP
AT5G16235	NA	NA	2.69509	0.0172895	UP
AT1G51860	NA	NA	2.691	1.06834e-22	UP
AT2G30660	NA	NA	2.69052	4.99917e-09	UP
AT3G26840	PES2	NA	2.68693	4.15036e-08	UP
AT3G13950	NA	NA	2.6825	5.48971e-28	UP
AT1G69490	ANAC029	Encodes a member of the NAC transcription factor gene family. It is expressed in floral primordia and upregulated by AP3 and PI. Its expression is associated with leaf senescence.	2.67885	1.62714e-22	UP
AT5G46350	ATWRKY8	member of WRKY Transcription Factor; Group II-c	2.67435	1.21231e-19	UP
AT2G19190	FRK1	Receptor-like protein kinase. Involved in early defense signaling.	2.6719	5.13314e-25	UP
AT3G27415	NA	NA	2.66945	0.00629363	UP
AT1G17830	NA	NA	2.66	8.20996e-14	UP
AT4G21440	ATM4	Encodes a MYB transcription factor involved in wounding and osmotic stress response. Member of the R2R3 factor gene family.	2.65878	0.0012472	UP
AT5G49480	ATCP1	AtCP1 encodes a novel Ca2+-binding protein, which shares sequence similarities with calmodulins. The expression of AtCP1 is induced by NaCl.	2.65823	1.65023e-36	UP
AT5G18270	ANAC087	NA	2.65222	9.13685e-17	UP
AT5G13820	ATBP-1	Encodes a protein that specifically binds plant telomeric DNA repeats. It has a single Myb telomeric DNA-binding domain in C-terminus that prefers the sequence TTTAGGG.	2.65174	1.96339e-13	UP
AT5G53970	AtTAT1	encodes tyrosine aminotransferase which is strongly induced upon aging and coronatine treatment	2.65076	1.07814e-67	UP
AT2G16760	NA	NA	2.65048	0.0180269	UP
AT5G07010	ATST2A	Encodes a sulfotransferase that acts specifically on 11- and 12-hydroxyjasmonic acid. Transcript levels for this enzyme are increased by treatments with jasmonic acid (JA), 12-hydroxyJA, JA-isoleucine, and 12-oxyphytodienoic acid (a JA precursor).	2.64864	0.0021294	UP
AT4G35060	HIPP25	NA	2.64318	2.7548e-11	UP
AT4G26488	NA	NA	2.64112	0.0162011	UP
AT1G09400	NA	NA	2.63975	0.000276177	UP
AT3G59850	NA	NA	2.63972	0.0108768	UP
AT5G45810	CIPK19	Encodes a member of the SNF1-related kinase (SnRK) gene family (SnRK3.5), which has also been reported as a member of the CBL-interacting protein kinases (CIPK19).	2.6392	0.0118506	UP
AT2G23270	NA	NA	2.63888	2.33399e-07	UP
AT2G20030	NA	NA	2.63255	0.00839988	UP
AT1G60730	NA	NA	2.63078	3.52526e-36	UP
AT4G39030	EDS5	Encodes an orphan multidrug and toxin extrusion transporter. Essential component of salicylic acid-dependent signaling for disease resistance. Member of the MATE-transporter family. Expression induced by salicylic acid. Mutants are salicylic acid-deficient.	2.63013	1.53476e-25	UP
AT2G18210	NA	NA	2.62266	5.5326e-13	UP
AT2G28500	NA	NA	2.62182	6.46697e-21	UP
AT3G13100	ABCC7	member of MRP subfamily	2.61917	1.08268e-28	UP
AT5G64190	NA	NA	2.6174	1.51688e-06	UP
AT3G28510	NA	NA	2.61566	7.54023e-24	UP
AT2G40200	NA	NA	2.61106	2.50643e-09	UP
AT1G23550	SRO2	Encodes a protein with similarity to RCD1 but without the WWE domain. The protein does have a PARP signature upstream of the C-terminal protein interaction domain. The PARP signature may bind NAD+ and attach the ADP-ribose-moiety from NAD+ to the target molecule. Its presence suggests a role for the protein in ADP ribosylation.	2.60668	1.0666e-13	UP
AT4G16690	ATMES16	Encodes a protein shown to have carboxylesterase activity, methyl IAA esterase activity, and methyl jasmonate esterase activity in vitro. This protein does not act on MeSA, MeGA4, or MEGA9 in vitro. Although MES16 is similar to MES17, a MeIAA hydrolase, two mes16 mutant lines (SALK_151578) and (SALK_139756) do not show altered sensitivity to MeIAA in root growth assays. MES16 transcripts appear t…	2.60521	1.23737e-65	UP
AT1G78780	NA	NA	2.60476	1.77275e-10	UP
AT5G47560	ATSDAT	Encodes a tonoplast malate/fumarate transporter.	2.60404	8.13337e-79	UP
AT1G22400	ATUGT85A1	NA	2.60329	2.39535e-25	UP
AT3G09960	NA	NA	2.60203	3.45024e-28	UP
AT1G57630	NA	NA	2.602	1.56712e-22	UP
AT1G69790	NA	NA	2.59979	3.47034e-09	UP
AT4G24110	NA	NA	2.59971	3.00812e-08	UP
AT1G54575	NA	NA	2.59877	2.13301e-14	UP
AT1G79400	ATCHX2	member of Putative Na+/H+ antiporter family	2.59295	0.0206707	UP
AT5G46360	ATKCO3	Encodes AtKCO3, a member of the Arabidopsis thaliana K+ channel family of AtTPK/KCO proteins. AtKCO3 is targeted to the vacuolar membrane. Forms homomeric ion channels in vivo.	2.59231	0.0416887	UP
AT4G09430	NA	NA	2.59218	0.0445948	UP
AT1G66040	NA	NA	2.59193	0.0403475	UP
AT5G19875	NA	NA	2.59046	4.14006e-19	UP
AT3G04000	NA	NA	2.58995	1.30742e-30	UP
AT4G33420	Prx47	NA	2.58726	4.5636e-22	UP
AT5G04950	ATNAS1	Encodes a nicotianamide synthase.	2.58095	1.03731e-17	UP
AT1G19210	ERF017	encodes a member of the DREB subfamily A-5 of ERF/AP2 transcription factor family. The protein contains one AP2 domain. There are 15 members in this subfamily including RAP2.1, RAP2.9 and RAP2.10.	2.57701	5.46814e-05	UP
AT1G02220	ANAC003	NA	2.56709	5.95596e-35	UP
AT3G44326	NA	NA	2.56148	3.39026e-07	UP
AT5G57480	NA	NA	2.55993	5.0076e-18	UP
AT5G64530	ANAC104	NA	2.55987	6.60875e-27	UP
AT2G37870	NA	NA	2.55869	1.62736e-20	UP
AT1G17745	PGDH	encodes a 3-Phosphoglycerate dehydrogenase	2.55725	1.31386e-19	UP
AT1G13340	ISTL6	NA	2.55475	9.73102e-09	UP
AT5G11920	AtcwINV6	Encodes a protein with fructan exohydrolase (FEH) activity acting on both inulin and levan-type fructans (1- and 6-FEH). The enzyme does not have invertase activity.	2.554	4.1291e-24	UP
AT5G26660	ATMYB86	a MYB gene encodes a transcriptional repressor of the C4H gene which is involved in the biosynthesis of sinapate esters.	2.55349	1.65459e-08	UP
AT1G52900	NA	NA	2.55126	0.000141137	UP
AT2G17500	PILS5	NA	2.54974	2.89081e-16	UP
AT4G15610	CASPL1D1	NA	2.54547	1.21863e-07	UP
AT1G51850	SIF2	NA	2.54513	5.22994e-54	UP
AT2G29480	ATGSTU2	Encodes glutathione transferase belonging to the tau class of GSTs. Naming convention according to Wagner et al. (2002).	2.53882	5.60089e-06	UP
AT4G06744	NA	NA	2.53753	8.21875e-21	UP
AT4G03480	NA	NA	2.53706	0.0019472	UP
AT5G64570	ATBXL4	Encodes a beta-d-xylosidase that belongs to family 3 of glycoside hydrolases.	2.52502	1.58509e-56	UP
AT1G74080	ATMYB122	Encodes a putative transcription factor, member of the R2R3 factor gene family (MYB122).	2.52302	1.62817e-12	UP
AT1G35910	AtTPPD	NA	2.52004	1.14087e-10	UP
AT1G74020	SS2	Encodes AtSS-2 strictosidine synthase.	2.51779	8.41091e-30	UP
AT4G30230	NA	NA	2.507	4.06522e-18	UP
AT4G40020	NA	NA	2.50474	9.41158e-15	UP
AT5G26690	HIPP02	NA	2.50256	1.78103e-22	UP
AT4G01870	NA	NA	2.50025	1.85764e-26	UP
AT5G66400	ATDI8	Belongs to the dehydrin protein family, which contains highly conserved stretches of 7-17 residues that are repetitively scattered in their sequences, the K-, S-, Y- and lysine rich segments. ABA- and drought-induced glycine-rice dehydrin protein. The ABA-induced expression of RAB18 was reduced following ACC application, indicating that ethylene inhibits the ABA signaling pathway. RAB18 is also e…	2.49997	1.18584e-37	UP
AT5G45080	AtPP2-A6	NA	2.49934	5.11951e-05	UP
AT1G59740	AtNPF4.3	NA	2.49651	2.89171e-19	UP
AT1G21740	NA	NA	2.49603	1.11813e-20	UP
AT1G79450	ALIS5	NA	2.49499	5.69773e-36	UP
AT3G13130	NA	NA	2.49359	4.04189e-15	UP
AT5G65130	WIND4	encodes a member of the DREB subfamily A-6 of ERF/AP2 transcription factor family. The protein contains one AP2 domain. There are 8 members in this subfamily including RAP2.4.	2.49346	0.0420256	UP
AT4G18170	ATWRKY28	member of WRKY Transcription Factor; Group II-c	2.49144	3.07605e-06	UP
AT1G32950	NA	NA	2.48806	1.28215e-11	UP
AT1G68940	NA	NA	2.48634	0.0484819	UP
AT1G26390	AtBBE4	NA	2.4789	2.37689e-26	UP
AT1G13530	NA	NA	2.47703	5.82375e-09	UP
AT5G11210	ATGLR2.5	member of Putative ligand-gated ion channel subunit family	2.47432	8.14899e-13	UP
AT3G60470	NA	NA	2.47337	2.24103e-13	UP
AT1G78380	ATGSTU19	Encodes a glutathione transferase that is a member of Tau GST gene family. Expression is induced by drought stress, oxidative stress, and high doses of auxin and cytokinin. naming convention according to Wagner et al. (2002) The expression of this gene is upregulated by herbicide safeners such as benoxacor and fenclorim.	2.46986	6.77041e-108	UP
AT1G68360	GIS3	NA	2.46707	3.804e-05	UP
AT3G60415	NA	NA	2.467	5.00397e-32	UP
AT1G63840	NA	NA	2.46543	8.34432e-26	UP
AT1G60830	NA	NA	2.46543	0.00246038	UP
AT1G13830	NA	NA	2.46537	7.93673e-12	UP
AT1G77380	AAP3	Amino acid permease which transports basic amino acids.	2.46287	1.19272e-23	UP
AT3G28210	PMZ	Encodes a putative zinc finger protein (PMZ).	2.45451	0.0010095	UP
AT1G30220	ATINT2	Inositol transporter presenting conserved extracellular loop domains homologs of plexins/semaphorin/integrin (PSI) domains from animal type I receptors.	2.45027	6.63381e-13	UP
AT4G18430	AtRABA1e	NA	2.45019	2.67213e-13	UP
AT4G25433	NA	NA	2.44882	0.0153126	UP
AT3G08040	ATFRD3	Encodes a member of the MATE (multidrug and toxin efflux family), expressed in roots but not shoots. Mutants accumulate excess iron, manganese and zinc, and express root Fe(III) chelatase activity even under iron sufficiency conditions. FRD3 is likely to function in root xylem loading of an iron chelator or other factor necessary for efficient iron uptake out of the xylem or apoplastic space and …	2.4473	0.00136814	UP
AT1G04490	NA	NA	2.4453	6.1066e-09	UP
AT5G40730	AGP24	Encodes an arabinogalactan-protein (AGP24).	2.44287	2.25541e-16	UP
AT2G25625	CV	NA	2.44035	9.26497e-33	UP
AT4G09030	AGP10	Encodes arabinogalactan protein (AGP10).	2.43995	6.2693e-39	UP
AT2G28400	NA	NA	2.43865	3.16098e-12	UP
AT5G62480	ATGSTU9	Encodes glutathione transferase belonging to the tau class of GSTs. Naming convention according to Wagner et al. (2002).	2.43829	2.33664e-07	UP
AT1G09240	ATNAS3	Encodes a nicotianamine synthase.	2.43646	3.88108e-27	UP
AT5G49700	AHL17	NA	2.4336	2.59476e-09	UP
AT3G47780	ABCA7	member of ATH subfamily	2.42974	5.17709e-39	UP
AT1G22440	NA	NA	2.42715	1.50122e-06	UP
AT4G12080	AHL1	NA	2.42468	1.70542e-21	UP
AT2G38340	DREB19	encodes a member of the DREB subfamily A-2 of ERF/AP2 transcription factor family. The protein contains one AP2 domain. There are eight members in this subfamily including DREB2A AND DREB2B that are involved in response to drought.	2.42408	1.14465e-09	UP
AT3G07365	NA	NA	2.42281	0.0108799	UP
AT1G75000	ELO3	NA	2.42249	3.644e-22	UP
AT1G79180	ATMYB63	Member of the R2R3 factor gene family.	2.4216	0.00499512	UP
AT5G16080	AtCXE17	NA	2.41889	1.30123e-20	UP
AT5G45090	AtPP2-A7	NA	2.41734	3.80638e-10	UP
AT3G60966	NA	NA	2.41578	6.30156e-17	UP
AT4G30290	ATXTH19	Encodes a xyloglucan endotransglucosylase/hydrolase with only only the endotransglucosylase (XET; EC 2.4.1.207) activity towards xyloglucan and non-detectable endohydrolytic (XEH; EC 3.2.1.151) activity. Expressed throughout both the main and the lateral root, with intensive expression at the dividing and elongating regions. Is expressed in lateral root primordia but expression ceases after later…	2.41222	5.04907e-11	UP
AT4G31970	NA	NA	2.40726	0.00319205	UP
AT5G54510	DFL1	Encodes an IAA-amido synthase that conjugates Ala, Asp, Phe, and Trp to auxin. Lines overexpressing this gene accumulate IAA-ASP and are hypersensitive to several auxins. Identified as a dominant mutation that displays shorter hypocotyls in light grown plants when compared to wild type siblings. Protein is similar to auxin inducible gene from pea (GH3).	2.40278	1.78744e-18	UP
AT3G53160	UGT73C7	NA	2.40113	0.000351468	UP
AT2G15780	NA	NA	2.40051	0.00110168	UP
AT2G20470	NA	NA	2.40049	0.0481735	UP
AT5G38344	NA	NA	2.39933	0.0109176	UP
AT2G37970	AtHBP2	NA	2.39932	6.82608e-24	UP
AT2G01610	NA	NA	2.39823	2.71899e-20	UP
AT4G37390	NA	NA	2.39757	4.53198e-11	UP
AT1G26410	NA	NA	2.39742	2.12695e-06	UP
AT1G14540	PER4	NA	2.39652	1.3996e-05	UP
AT5G59820	AtZAT12	Encodes a zinc finger protein involved in high light and cold acclimation. Overexpression of this putative transcription factor increases the expression level of 9 cold-responsive genes and represses the expression level of 15 cold-responsive genes, including CBF genes. Also, lines overexpressing this gene exhibits a small but reproducible increase in freeze tolerance. Because of the repression o…	2.39408	1.45281e-13	UP
AT4G09300	NA	NA	2.39143	0.000137731	UP
AT5G13080	ATWRKY75	WRKY75 is one of several transcription factors induced during Pi deprivation. It is nuclear localized and regulated differentially during Pi starvation. RNAi mediated suppression of WRKY75 made the plants more susceptible to Pi stress as indicated by the higher accumulation of anthocyanin during Pi starvation.	2.39074	1.58309e-14	UP
AT1G52890	ANAC019	encodes a NAC transcription factor whose expression is induced by drought, high salt, and abscisic acid. This gene binds to ERD1 promoter in vitro.	2.38944	0.000699084	UP
AT2G38490	CIPK22	member of AtCIPKs	2.38871	2.3392e-07	UP
AT3G49780	ATPSK3	Phytosulfokine 3 precursor, coding for a unique plant peptide growth factor. Plants overexpressing this gene (under a 35S promoter), develop normal cotyledons and hypocotyls but their growth, in particular that of their roots, was faster than that of wildtype.	2.38781	3.67604e-14	UP
AT4G01540	ANAC068	Encodes a membrane-bound NAC (for NAM, ATAF1/2, CUC2) transcription factor, designated NTM1 (for NAC with transmembrane motif1). NTM1 regulates cell division in Arabidopsis.	2.38758	7.9434e-16	UP
AT5G36970	NA	NA	2.38615	3.69867e-06	UP
AT1G57650	NA	NA	2.38611	4.66511e-15	UP
AT5G49690	NA	NA	2.38597	3.16244e-07	UP
AT2G43570	CHI	NA	2.385	2.22577e-25	UP
AT5G39970	NA	NA	2.38493	0.0357262	UP
AT3G11580	NGAL2	NA	2.37735	2.42137e-21	UP
AT1G51890	NA	NA	2.37483	3.13635e-22	UP
AT5G63130	NA	NA	2.37341	4.53575e-08	UP
AT5G24140	SQP2	Encodes a protein with similarity to squalene monoxygenases.	2.37331	5.74883e-05	UP
AT5G50560	NA	NA	2.37193	7.09776e-06	UP
AT5G50660	NA	NA	2.37193	7.09776e-06	UP
AT3G11570	TBL8	Encodes a member of the TBL (TRICHOME BIREFRINGENCE-LIKE) gene family containing a plant-specific DUF231 (domain of unknown function) domain. TBL gene family has 46 members, two of which (TBR/AT5G06700 and TBL3/AT5G01360) have been shown to be involved in the synthesis and deposition of secondary wall cellulose, presumably by influencing the esterification state of pectic polymers. A nomenclature…	2.37065	9.49457e-13	UP
AT5G24080	NA	NA	2.36905	0.00459093	UP
AT4G05110	ATENT6	NA	2.36876	1.42438e-06	UP
AT2G30770	CYP71A13	putative cytochrome P450	2.36842	3.33339e-08	UP
AT5G38900	PDI	NA	2.36735	9.07105e-22	UP
AT3G26470	NA	NA	2.36377	2.15296e-22	UP
AT1G74590	ATGSTU10	Encodes glutathione transferase belonging to the tau class of GSTs. Naming convention according to Wagner et al. (2002).	2.36337	2.99574e-16	UP
AT5G44390	AtBBE25	NA	2.36004	1.04827e-35	UP
AT2G04430	atnudt5	NA	2.35777	1.26434e-35	UP
AT1G26930	NA	NA	2.35611	3.29321e-26	UP
AT3G21230	4CL5	The gene encodes a 4-coumarate coenzyme A ligase being able to use sinapate as substrate. The catalytic efficiency was in the following (descending) order: p-coumaric acid, caffeic acid, 5-OH-ferulic acid, ferulic acid and sinapic acid. At4CL5 was unable to use cinnamic acid as substrate. Knockout of At4CL5 (4cl5) revealed no effect on syringyl lignin content indicating that the activity observed…	2.35395	2.83503e-06	UP
AT3G46090	ZAT7	NA	2.35273	6.33411e-14	UP
AT1G71140	DTX14	NA	2.35065	7.7444e-57	UP
AT1G65690	NHL6	NA	2.34429	6.93878e-17	UP
AT3G15500	ANAC055	Encodes an ATAF-like NAC-domain transcription factor that doesn't contain C-terminal sequences shared by CUC1, CUC2 and NAM. Note: this protein (AtNAC3) is not to be confused with the protein encoded by locus AT3G29035, which, on occasion, has also been referred to as AtNAC3.	2.34403	2.29046e-14	UP
AT5G12340	NA	NA	2.34308	5.59867e-06	UP
AT5G46130	NA	NA	2.3411	3.38726e-06	UP
AT5G60630	NA	NA	2.33796	1.80119e-08	UP
AT3G21670	AtNPF6.4	NA	2.33637	1.63893e-65	UP
AT5G48180	AtNSP5	Encodes a nitrile-specifier protein NSP5. NSP5 is one out of five (At3g16400/NSP1, At2g33070/NSP2, At3g16390/NSP3, At3g16410/NSP4 and At5g48180/NSP5) A. thaliana epithiospecifier protein (ESP) homologues that promote simple nitrile, but not epithionitrile or thiocyanate formation.	2.33407	2.21596e-66	UP
AT3G51330	NA	NA	2.33088	6.64809e-22	UP
AT4G29570	NA	NA	2.32961	0.0192892	UP
AT1G52565	NA	NA	2.32953	3.53568e-07	UP
AT4G06410	NA	NA	2.32775	0.00332637	UP
AT3G24170	ATGR1	Encodes a cytosolic glutathione reductase.	2.32346	7.31677e-76	UP
AT4G30460	NA	NA	2.32252	2.84155e-17	UP
AT5G16360	NA	NA	2.32154	6.5019e-06	UP
AT5G64890	NA	NA	2.31884	2.74872e-07	UP
AT1G79520	NA	NA	2.31857	1.14871e-25	UP
AT4G39320	NA	NA	2.31748	6.3652e-09	UP
AT4G28556	RIC7	Encodes RIC7, the downstream effector of active Rop2 GTPase.	2.315	3.42683e-05	UP
AT4G39670	GLTP	NA	2.31374	7.68437e-05	UP
AT2G25470	AtRLP21	NA	2.31033	3.81065e-12	UP
AT2G34070	TBL37	Encodes a member of the TBL (TRICHOME BIREFRINGENCE-LIKE) gene family containing a plant-specific DUF231 (domain of unknown function) domain. TBL gene family has 46 members, two of which (TBR/AT5G06700 and TBL3/AT5G01360) have been shown to be involved in the synthesis and deposition of secondary wall cellulose, presumably by influencing the esterification state of pectic polymers. A nomenclature…	2.30928	2.62366e-20	UP
AT1G34060	TAR4	NA	2.30658	3.15298e-08	UP
AT1G80820	ATCCR2	Encodes an cinnamoyl CoA reductase isoform. Involved in lignin biosynthesis.	2.30294	1.25251e-10	UP
AT5G67600	AthCYSTM13	NA	2.30284	3.23194e-66	UP
AT1G49900	NA	NA	2.30165	0.0171761	UP
AT3G29810	COBL2	NA	2.29827	2.19647e-17	UP
AT3G25250	AGC2	Arabidopsis protein kinase	2.29651	1.08569e-06	UP
AT1G72770	AtHAB1	mutant has ABA hypersensitive inhibition of seed germination; Protein Phosphatase 2C; regulates the activation of the Snf1-related kinase OST1 by abscisic acid.	2.29399	5.12094e-17	UP
AT4G13395	DVL10	NA	2.29281	1.20356e-09	UP
AT3G51660	NA	NA	2.29182	2.9161e-46	UP
AT1G04500	NA	NA	2.29012	0.00027096	UP
AT5G05390	LAC12	putative laccase, a member of laccase family of genes (17 members in Arabidopsis).	2.28741	0.0186794	UP
AT5G53870	AtENODL1	NA	2.28645	1.11527e-21	UP
AT1G72860	NA	NA	2.28629	0.0232871	UP
AT1G67520	NA	NA	2.28307	9.83602e-29	UP
AT1G05000	AtPFA-DSP1	NA	2.28047	2.26522e-17	UP
AT5G36907	NA	NA	2.27945	0.0026284	UP
AT1G77880	NA	NA	2.27678	0.0160026	UP
AT1G62620	NA	NA	2.2758	1.38035e-05	UP
AT4G03450	NA	NA	2.2751	7.75581e-27	UP
AT1G69050	NA	NA	2.27431	8.59567e-05	UP
AT2G21188	NA	NA	2.27309	5.59888e-07	UP
AT3G49210	WSD6	NA	2.27118	7.57007e-18	UP
AT3G60940	NA	NA	2.27044	0.0450495	UP
AT2G04100	NA	NA	2.26924	2.49717e-31	UP
AT4G11230	RbohI	NA	2.26911	0.0379621	UP
AT4G18630	NA	NA	2.26347	7.67714e-37	UP
AT2G34810	AtBBE16	NA	2.26261	2.23429e-06	UP
AT5G20960	AAO1	Encodes aldehyde oxidase AA01.	2.26114	5.27711e-30	UP
AT5G53120	ATSPDS3	encodes a novel spermine synthase and is a paralog of previously characterized spermidine synthases, SPDS1 and SPDS2. SPDS3 forms heterodimers with SDPS2, which in turn forms heterodimers with SDPS1 in vivo. The gene does not complement speDelta3 deficiency of spermidine synthase in yeast but DOES complement speDelta4 deficiency.	2.26011	3.46435e-28	UP
AT4G20110	BP80-3;1	NA	2.25864	3.78026e-36	UP
AT4G34230	ATCAD5	Encodes a catalytically active cinnamyl alcohol dehydrogenase which uses p-coumaryl aldehyde as a preferred substrate. It can also use sinapyl, caffeyl, coniferyl and d-hydroxyconiferyl aldehydes as substrates.	2.25454	1.019e-07	UP
AT2G36950	NA	NA	2.25215	4.06684e-41	UP
AT5G01820	ATCIPK14	Encodes a CBL-interacting serine/threonine protein kinase.	2.25109	1.64412e-61	UP
AT1G07430	AIP1	NA	2.25103	2.34865e-08	UP
AT5G58770	AtcPT4	NA	2.25095	9.53912e-35	UP
AT3G07390	AIR12	isolated from differential screening of a cDNA library from auxin-treated root culture. sequence does not show homology to any known proteins and is predicted to be extracellular.	2.25027	3.53652e-65	UP
AT2G22470	AGP2	Encodes arabinogalactan-protein (AGP2).	2.25027	0.000401978	UP
AT4G34200	EDA9	NA	2.2498	4.0902e-35	UP
AT1G30760	AtBBE-like	NA	2.24732	0.0175808	UP
AT4G09750	NA	NA	2.24635	1.09184e-63	UP
AT4G05540	NA	NA	2.24614	1.90891e-11	UP
AT3G22100	NA	NA	2.24521	0.0124437	UP
AT3G53600	ZAT18	NA	2.24439	0.0352107	UP
AT1G13970	NA	NA	2.24387	9.26206e-24	UP
AT3G03700	NA	NA	2.24058	1.49854e-07	UP
AT5G44990	NA	NA	2.23935	9.95407e-08	UP
AT1G17615	NA	NA	2.23717	7.26916e-08	UP
AT4G11350	NA	NA	2.23632	5.72994e-15	UP
AT5G47050	NA	NA	2.23423	6.3372e-47	UP
AT3G62590	PLIP3	NA	2.23172	3.48145e-30	UP
AT2G24100	ASG1	NA	2.23149	5.1975e-13	UP
AT1G61930	NA	NA	2.23026	0.0445972	UP
AT5G61490	NA	NA	2.23006	5.67506e-11	UP
AT2G47190	ATMYB2	Encodes a MYB transcription factor that possesses an R2R3 MYB DNA binding domain and is known to regulate the expression of salt- and dehydration-responsive genes. Has been shown to bind calmodulin.	2.22899	6.45676e-19	UP
AT4G19230	CYP707A1	Encodes a protein with ABA 8'-hydroxylase activity, involved in ABA catabolism. Member of the CYP707A gene family. CYP707A1 appears to play an important role in determining the ABA levels in dry seeds. Gene involved in postgermination growth. Overexpression of CYP707A1 leads to a decrease in ABA levels and a reduction in after-ripening period to break dormancy.	2.22848	2.30394e-07	UP
AT5G09440	EXL4	NA	2.22646	2.79525e-16	UP
AT2G03505	NA	NA	2.22534	2.67775e-13	UP
AT5G51060	ATRBOHC	RHD2 (along with RHD3 and RHD4) is required for normal root hair elongation. Has NADPH oxidase activity. Gene is expressed in the elongation and differention zone in trichoblasts and elongating root hairs. RDH2 is localized to the growing tips of root hair cells. It is required for the production of reactive oxygen species in response to extracellular ATP stimulus. The increase in ROS production …	2.22418	0.00267935	UP
AT4G19420	PAE8	NA	2.22403	7.86723e-43	UP
AT3G10815	NA	NA	2.22349	6.08085e-09	UP
AT2G37040	ATPAL1	Encodes PAL1, a phenylalanine ammonia-lyase. Arabidopsis has four PALs: AT2G37040 (PAL1), AT3G53260 (PAL2), AT5G04230 (PAL3) and AT3G10340 (PAL4).	2.21539	1.6375e-26	UP
AT2G25000	ATWRKY60	Pathogen-induced transcription factor. Forms protein complexes with itself and with WRKY40. Coexpression with WRKY18 or WRKY40 made plants more susceptible to both P. syringae and B. cinerea. WRKY18, WRKY40, and WRKY60 have partially redundant roles in response to the hemibiotrophic bacterial pathogen Pseudomonas syringae and the necrotrophic fungal pathogen Botrytis cinerea, with WRKY18 playing …	2.21163	3.72578e-30	UP
AT1G07610	MT1C	one of the five metallothioneins (MTs) genes identified in Arabidopsis. MTs are cysteine-rich proteins required for heavy metal tolerance.	2.20626	1.41784e-25	UP
AT3G15340	PPI2	Hypothetical protein similar to PPI1, a protein that interacts with the plasma membrane H+ ATPase AHA1	2.20324	2.70872e-09	UP
AT1G14080	ATFUT6	member of Xyloglucan fucosyltransferase family	2.20175	9.65523e-08	UP
AT1G66160	ATCMPG1	NA	2.20152	1.62952e-16	UP
AT3G05820	A/N-InvH	Encodes a putative plastid-targeted alkaline/neutral invertase.	2.20036	0.0192206	UP
AT3G52820	ATPAP22	NA	2.19199	0.000425498	UP
AT3G04060	anac046	NA	2.18949	3.0959e-10	UP
AT4G07820	NA	NA	2.18883	1.39296e-05	UP
AT5G17390	NA	NA	2.1879	0.00981699	UP
AT5G06330	NA	NA	2.18746	1.51174e-12	UP
AT2G40113	NA	NA	2.18508	8.41451e-05	UP
AT2G15220	NA	NA	2.18468	2.27479e-11	UP
AT1G62710	AEP2	Encodes a vacuolar processing enzyme belonging to a novel group of cysteine proteases that is expressed specifically in seeds and is essential for the proper processing of storage proteins.	2.18306	1.33241e-23	UP
AT1G31820	PUT1	NA	2.1803	7.16847e-24	UP
AT1G62760	AtPMEI10	NA	2.17887	0.0368307	UP
AT4G36990	NA	NA	2.17794	1.90377e-17	UP
AT3G63010	ATGID1B	Encodes a gibberellin (GA) receptor ortholog of the rice GA receptor gene (OsGID1). Has GA-binding activity, showing higher affinity to GA4. Interacts with DELLA proteins in vivo in the presence of GA4.	2.17776	1.08238e-19	UP
AT1G52342	NA	NA	2.17691	4.3375e-24	UP
ATMG01090	NA	NA	2.1764	0.0395817	UP
AT5G66690	UGT72E2	UGT72E2 is an UDPG:coniferyl alcohol glucosyltransferase which glucosylates sinapyl- and coniferyl aldehydes as well as sinapyl- and coniferyl alcohol. The enzyme is thought to be involved in lignin metabolism. A knockdown mutant line (72E2KD) was obtained using RNAi silencing. A twofold reduction in coniferyl alcohol 4-<i>O</i>-glucoside and sinapyl alcohol 4-<i>O</i>-glucoside was detected in t…	2.17635	1.5628e-10	UP
AT5G58350	WNK4	Encodes a member of the WNK family (9 members in all) of protein kinases, the structural design of which is clearly distinct from those of other known protein kinases, such as receptor-like kinases and mitogen-activated protein kinases. Its transcription is under the control of circadian rhythms.	2.17458	5.10984e-26	UP
AT2G39030	NATA1	NA	2.17269	0.0035257	UP
AT3G28100	UMAMIT45	NA	2.17149	2.33211e-32	UP
AT2G21320	BBX18	NA	2.17052	5.52558e-31	UP
AT5G52300	LTI65	encodes a protein that is induced in expression in response to water deprivation such as cold, high-salt, and dessication. The response appears to be via abscisic acid. The promoter region contains two ABA-responsive elements (ABREs) that are required for the dehydration-responsive expression of rd29B as cis-acting elements. Protein is a member of a gene family with other members found plants, an…	2.16903	3.02097e-09	UP
AT3G09520	ATEXO70H4	A member of EXO70 gene family, putative exocyst subunits, conserved in land plants. Arabidopsis thaliana contains 23 putative EXO70 genes, which can be classified into eight clusters on the phylogenetic tree.	2.16752	2.66242e-15	UP
AT1G05100	MAPKKK18	member of MEKK subfamily	2.16751	0.00867279	UP
AT1G54100	ALDH7B4	Aldehyde dehydrogenase	2.16539	8.86601e-26	UP
AT4G08290	UMAMIT20	NA	2.16529	3.62059e-25	UP
AT1G17860	AtKTI5	NA	2.16338	0.000366882	UP
AT2G36800	DOGT1	Encodes a DON-Glucosyltransferase. The UGT73C5 glucosylates both brassinolide and castasterone in the 23-O position. The enzyme is presumably involved in the homeostasis of those steroid hormones hence regulating BR activity. Transgenic plants overexpressing UGT73C5 show a typical BR-deficient phenotype.	2.16281	7.85326e-29	UP
AT4G32650	ATKC1	Encodes KAT3, a member of the Shaker family of voltage-gated potassium channel subunits. Does not form functional potassium channel on its own. Involved in down-regulating AKT1 and KAT1 channel activity by forming heteromers with AKT1 or KAT1. The Shaker family K+ ion channels include five groups based on phylogenetic analysis (FEBS Letters (2007) 581: 2357): I (inwardly rectifying conductance): …	2.15807	4.05968e-19	UP
AT1G04570	NA	NA	2.15752	2.28665e-09	UP
AT5G52810	SARD4	NA	2.15362	5.13337e-27	UP
AT4G26470	NA	NA	2.14994	1.82478e-10	UP
AT4G28460	NA	NA	2.1469	1.09018e-07	UP
AT5G07880	ATSNAP29	member of mammalian SNAP25 Gene Family, a type of SNARE proteins with two chains. There are three members in Arabidopsis: SNAP30, SNAP29, and SNAP33.	2.14461	0.0495044	UP
AT2G22880	VQ12	NA	2.1436	0.0491012	UP
AT1G18980	NA	NA	2.14292	0.0232345	UP
AT4G04540	CRK39	Encodes a cysteine-rich receptor-like protein kinase.	2.14064	7.38814e-10	UP
AT5G02230	NA	NA	2.13984	1.14989e-29	UP
AT2G05910	NA	NA	2.13673	0.000362211	UP
AT3G17420	GPK1	serine/threonine protein kinase-like protein	2.13536	1.13487e-21	UP
AT5G46590	anac096	NA	2.13475	0.00122976	UP
AT1G76240	NA	NA	2.13246	3.38448e-11	UP
AT1G70140	ATFH8	Encodes a group I formin. Binds to F-actin barbed ends. Has severing actin filaments activity. Binds profilin. Involved in the initiation and tip growth of root hairs through regulation of actin cytoskeleton.	2.13152	1.87321e-22	UP
AT1G14860	NA	NA	2.12797	0.000211001	UP
AT1G21410	SKP2A	AtSKP2;1 is a homolog of human SKP2, the human F-box protein that recruits E2F1. Contains an F-box motif at the N-terminal region and a C-terminal Leu-rich repeat domain. Forms part of an E3-ubiquitin-ligase SCF (Skp1, cullin, F-box) complex and recruits phosphorylated AtE2Fc, a transcriptional factor that might play a role in cell division and during the transition from skotomorphogenesis to pho…	2.1257	1.00995e-34	UP
AT1G67070	DIN9	Encodes a protein with phosphomannose isomerase activity that is involved in synthesis of ascorbic acid. Expression is induced after 24 hours of dark treatment, in senescing leaves and treatment with exogenous photosynthesis inhibitor. Induction of gene expression was suppressed in excised leaves supplied with sugar. The authors suggest that the gene's expression pattern is responding to the leve…	2.12529	1.402e-21	UP
AT1G11540	NA	NA	2.12339	0.0171272	UP
AT5G01640	PRA1.B5	NA	2.12203	3.74173e-14	UP
AT1G19490	NA	NA	2.12067	5.97401e-09	UP
AT5G27060	AtRLP53	NA	2.12047	0.000141781	UP
AT5G39660	CDF2	Dof-type zinc finger domain-containing protein, identical to H-protein promoter binding factor-2a GI:3386546 from (Arabidopsis thaliana). Interacts with LKP2 and FKF1, but its overexpression does not change flowering time under short or long day conditions.	2.11916	9.17466e-22	UP
AT1G65481	NA	NA	2.1174	2.21645e-07	UP
AT3G22072	NA	NA	2.1155	0.0163993	UP
AT5G01540	LecRK-VI.2	Encodes LecRKA4.1, a member of the lectin receptor kinase subfamily A4 (LecRKA4.1 At5g01540; LecRKA4.2 At5g01550; LecRKA4.3 At5g01560). Together with other members of the subfamily, functions redundantly in the negative regulation of ABA response in seed germination.	2.11518	2.91307e-17	UP
AT1G70000	MYBD	NA	2.11411	4.19707e-20	UP
AT1G72680	ATCAD1	NA	2.11358	2.24655e-52	UP
AT5G38650	NA	NA	2.1135	7.30151e-27	UP
AT2G21780	NA	NA	2.11082	0.0134664	UP
AT1G64970	G-TMT	gamma-tocopherol methyltransferase (g-TMT) mRNA, nuclear; mutant has Deficient in alpha and beta tocopherol; Accumulates gamma tocopherol in leaves	2.10854	1.35387e-38	UP
AT1G62570	FMO	belongs to the flavin-monooxygenase (FMO) family, encodes a glucosinolate S-oxygenase that catalyzes the conversion of methylthioalkyl glucosinolates to methylsulfinylalkyl glucosinolates	2.1074	2.01304e-16	UP
AT1G19610	LCR78	Predicted to encode a PR (pathogenesis-related) protein. Belongs to the plant defensin (PDF) family with the following members: At1g75830/PDF1.1, At5g44420/PDF1.2a, At2g26020/PDF1.2b, At5g44430/PDF1.2c, At2g26010/PDF1.3, At1g19610/PDF1.4, At1g55010/PDF1.5, At2g02120/PDF2.1, At2g02100/PDF2.2, At2g02130/PDF2.3, At1g61070/PDF2.4, At5g63660/PDF2.5, At2g02140/PDF2.6, At5g38330/PDF3.1 and At4g30070/PDF…	2.10719	1.67674e-07	UP
AT1G22220	NA	NA	2.10633	0.022445	UP
AT1G30040	ATGA2OX2	Encodes a gibberellin 2-oxidase that acts on C-19 gibberellins. AtGA2OX2 expression is responsive to cytokinin and KNOX activities.	2.10173	3.87078e-17	UP
AT5G22300	AtNIT4	encodes a nitrilase isomer. The purified enzyme shows a strong substrate specificity for beta-cyano-L-alanine, a intermediate product of the cyanide detoxification pathway.	2.09705	1.75344e-21	UP
AT1G36622	NA	NA	2.09062	4.50934e-11	UP
AT5G59780	ATMYB59	Encodes a putative transcription factor (MYB59).	2.08965	5.72443e-33	UP
AT3G03341	NA	NA	2.08947	1.62842e-06	UP
AT3G47480	CML47	NA	2.08808	1.08556e-18	UP
AT1G37130	ATNR2	Identified as a mutant resistant to chlorate. Encodes nitrate reductase structural gene. Involved in nitrate assimilation. Has nitrate reductase activity. Up-regulated by the fungus P. indica. Binds transcription factor At2g35940.	2.08638	8.27629e-74	UP
AT3G14225	GLIP4	Contains lipase signature motif and GDSL domain.	2.08501	0.00168923	UP
AT4G10040	CYTC-2	Encodes cytochrome c. Promoter directs preferential expression in vascular tissues of cotyledons, leaves, roots, and hypocotyls, and in anthers.	2.08452	1.59969e-27	UP
AT4G14640	AtCML8	encodes a divergent member of calmodulin, which is an EF-hand family of Ca2+-binding proteins. This gene is expressed in leaves, flowers and siliques. The gene functionally complements yeast calmodulin 1 (CAM1). Also the protein does not form formed a complex with a basic amphiphilic helical peptide in the presence of Ca2+ in vitro. Authors suggest that this gene may represent a Ca2+-binding sens…	2.08345	2.21145e-07	UP
AT4G02330	AtPME41	NA	2.08188	9.12676e-21	UP
AT2G07695	NA	NA	2.07752	0.0462349	UP
AT1G44130	NA	NA	2.07584	3.35278e-13	UP
AT1G13540	NA	NA	2.07531	1.43882e-06	UP
AT1G29290	NA	NA	2.07312	5.90452e-12	UP
AT2G31380	BBX25	a B-box zinc finger protein that interacts with COP1. contains a novel 11 amino acid motif at the C-terminus (also found at the N-terminus of HY5) that is involved in the COP1 interaction.	2.07093	4.25527e-25	UP
AT3G21240	4CL2	encodes an isoform of 4-coumarate:CoA ligase (4CL), which is involved in the last step of the general phenylpropanoid pathway. The catalytic efficiency was in the following (descending) order: p-coumaric acid, caffeic acid, ferulic acid, 5-OH-ferulic acid and cinnamic acid. At4CL2 was unable to use sinapic acid as substrate.	2.07089	2.09292e-23	UP
AT3G15510	ANAC056	Note of caution: not to be confused with another protein (AtNAC6 locus AT5G39610) which on occasion has also been referred to as AtNAC2.	2.06771	4.75948e-35	UP
AT5G44460	CML43	NA	2.06471	1.00955e-10	UP
AT1G06570	HPD	Mutation of the PDS1 locus disrupts the activity of p-hydroxyphenylpyruvate dioxygenase (HPPDase), the first committed step in the synthesis of both plastoquinone and tocopherols in plants.	2.064	5.282e-27	UP
AT5G64120	AtPRX71	encodes a cell wall bound peroxidase that is induced by hypo-osmolarity	2.06169	1.87213e-31	UP
AT2G29750	UGT71C1	NA	2.0614	5.54184e-07	UP
AT3G12580	ATHSP70	NA	2.05995	1.44119e-12	UP
AT1G01520	ASG4	NA	2.05907	0.0248203	UP
AT3G11340	UGT76B1	NA	2.05838	0.00118844	UP
AT1G61490	NA	NA	2.05668	2.55157e-25	UP
AT3G10930	IDL7	NA	2.05535	1.41121e-07	UP
AT2G33590	AtCRL1	NA	2.0517	6.16013e-36	UP
AT1G53980	NA	NA	2.0474	0.00688596	UP
AT3G13520	AGP12	Encodes a GPI-anchored arabinogalactan (AG) peptide with a short 'classical' backbone of 10 amino acids, seven of which are conserved among the 4 other Arabidopsis AG peptides. These peptides may be involved in cell signaling.	2.0451	2.07337e-44	UP
AT5G24120	ATSIG5	Encodes a specialized sigma factor that functions in regulation of plastid genes and is responsible for the light-dependent transcription at the psbD LRP. Activation of SIG5 is dependent upon blue light and mediated by cryptochromes.	2.03777	2.6185e-18	UP
AT1G45145	ATH5	encodes a cytosolic thioredoxin that reduces disulfide bridges of target proteins by the reversible formation of a disulfide bridge between two neighboring Cys residues present in the active site. Thioredoxins have been found to regulate a variety of biological reactions in prokaryotic and eukaryotic cells.	2.03611	1.44932e-15	UP
AT1G13520	NA	NA	2.03538	4.81673e-08	UP
AT5G17760	NA	NA	2.03537	4.82556e-37	UP
AT4G24026	NA	NA	2.03392	1.72538e-09	UP
AT4G37770	ACS8	Encodes an auxin inducible ACC synthase.	2.0301	1.79163e-09	UP
AT2G16720	ATMYB7	Encodes a member of MYB3R- and R2R3- type MYB- encoding genes	2.02989	5.47604e-12	UP
AT5G17860	CAX7	NA	2.02849	3.6355e-13	UP
AT1G56010	anac021	Encodes a transcription factor involved in shoot apical meristem formation and auxin-mediated lateral root formation. The gene is thought not to be involved in stress responses (NaCl, auxins, ethylene). NAC1 (NAC1)	2.02793	1.36174e-44	UP
AT4G05100	AtMYB74	Member of the R2R3 factor gene family.	2.02726	0.0146353	UP
AT4G29850	NA	NA	2.02697	3.77721e-17	UP
AT1G24575	NA	NA	2.0252	1.24493e-30	UP
AT5G60440	AGL62	AGL62 encodes a Type I MADS domain protein that likely functions as a transcription factor. It is expressed AGL62 is expressed exclusively in the endosperm. AGL62 supresses suppresses cellularization during the syncytial phase of endosperm development.	2.02369	0.000102959	UP
AT5G64905	PROPEP3	NA	2.02207	2.17679e-06	UP
AT5G39670	CML46	NA	2.02102	2.23186e-14	UP
AT2G43000	ANAC042	NA	2.01944	1.40832e-16	UP
AT4G38830	CRK26	Encodes a cysteine-rich receptor-like protein kinase.	2.0177	0.00116163	UP
AT2G16790	NA	NA	2.01699	9.67569e-16	UP
AT2G43150	NA	NA	2.01424	2.10061e-76	UP
AT5G26920	CBP60G	Encodes a calmodulin-binding protein CBP60g (calmodulin binding protein 60-like.g). The calmodulin-binding domain is located near the N-terminus; calmodulin binding is dependent on Ca(2+). Inducible by both bacterial pathogen and MAMP (microbe-associated molecular pattern) treatments. Bacterial growth is enhanced in cbp60g mutants. cbp60g mutants also show defects in salicylic acid (SA) accumulat…	2.01388	6.08752e-14	UP
AT1G78410	NA	NA	2.01346	1.16619e-18	UP
AT2G37130	NA	NA	2.01067	2.92213e-13	UP
AT1G68390	NA	NA	2.00994	6.92646e-12	UP
AT2G30490	ATC4H	Encodes a cinnamate-4-hydroxylase. Mutations in this gene impact phenylpropanoid metabolism, growth and development.	2.00896	2.52268e-20	UP
AT2G31570	ATGPX2	glutathione peroxidase GPx	2.00837	3.85948e-46	UP
AT2G44910	ATHB-4	Encodes a homeodomain protein whose expression displays a dependence on phyB for both red and far-red light response. Also involved in the shade avoidance syndrome.	2.00751	3.49904e-06	UP
AT3G24460	NA	NA	2.00713	1.30413e-05	UP
AT5G11230	UAFT2	NA	2.0061	5.16035e-15	UP
AT3G45130	LAS1	NA	2.00161	2.11213e-08	UP
AT3G49570	LSU3	NA	1.99849	1.01468e-08	UP
AT4G14630	GLP9	germin-like protein with N-terminal signal sequence that may target it to the vacuole, plasma membrane and/or outside the cell.	1.99764	1.62931e-09	UP
AT5G47590	NA	NA	1.99686	2.42002e-05	UP
AT4G20860	AtBBE22	NA	1.99651	9.8654e-06	UP
AT3G14680	CYP72A14	putative cytochrome P450	1.99439	4.69174e-14	UP
AT5G14640	ATSK13	NA	1.99381	9.33022e-45	UP
AT1G14330	NA	NA	1.99221	1.29284e-57	UP
AT1G78000	SEL1	Encodes a sulfate transporter that can restore sulfate uptake capacity of a yeast mutant lacking sulfate transporter genes.	1.98845	2.7631e-11	UP
AT1G08940	NA	NA	1.98843	2.04134e-18	UP
AT2G05540	NA	NA	1.98805	5.94563e-28	UP
AT1G52855	NA	NA	1.9843	2.53496e-14	UP
AT1G06520	ATGPAT1	Encodes a membrane associated mitochondrial localized protein with glycerol-3-phosphate acyltransferase activity.Expressed in flower buds and siliques. Homozygous mutant plants are male sterile and have abnormal glycerolipid levels.	1.98307	3.82695e-06	UP
AT2G42360	NA	NA	1.98106	0.000213782	UP
AT4G21920	NA	NA	1.9797	0.00437493	UP
AT2G35950	EDA12	NA	1.97935	0.00458983	UP
AT3G23510	NA	NA	1.97767	7.11675e-12	UP
AT2G26170	CYP711A1	Encodes a protein with similarity to thromboxane-A synthase, member of the CYP711A cytochrome P450 family. MAX1 is a specific repressor of vegetative axillary buds generated by the axillary meristem. Expressed in vascular traces in the rosette stem and axillary buds throughout plant development. Mutants have increased axillary branches. Along with MAX3,4 thought to mediate control of shoot branch…	1.97738	2.53839e-26	UP
AT1G66173	NA	NA	1.97552	0.0146973	UP
AT4G39610	NA	NA	1.97407	7.20646e-10	UP
AT1G07620	ATOBGM	NA	1.97344	2.50742e-19	UP
AT1G51800	IOS1	NA	1.97326	2.22915e-19	UP
AT1G01340	ACBK1	member of Cyclic nucleotide gated channel family	1.97135	3.59115e-25	UP
AT5G67340	PUB2	NA	1.96646	8.08405e-12	UP
AT1G58340	ABS4	NA	1.96511	1.31051e-08	UP
AT4G12410	SAUR35	NA	1.96399	0.0237958	UP
AT3G21150	AtBBX32	Encodes a protein with a B-box domain predicted to act as a transcription factor. Expression of the BBX32 gene is affected by monochromatic red light.	1.96238	9.66639e-08	UP
AT3G51895	AST12	Encodes a sulfate transporter.	1.96011	2.91568e-39	UP
AT1G66600	ABO3	A member of WRKY Transcription Factor; Group III. Involved in the regulation of plant responses to ABA and drought stress.	1.9597	7.51853e-09	UP
AT4G10960	UGE5	Encodes a protein with UDP-D-glucose 4-epimerase activity.	1.9592	1.69091e-23	UP
AT1G21310	ATEXT3	Encodes extensin 3.	1.95879	3.48177e-16	UP
AT4G26260	MIOX4	Encodes a myo-inositol oxygenase.	1.95472	0.0314829	UP
AT5G18661	NA	NA	1.95417	0.0386486	UP
AT3G03640	BGLU25	Encodes beta-glucosidase (GLUC).	1.95314	1.50813e-36	UP
AT1G62300	ATWRKY6	Encodes a transcription factor WRKY6. Regulates Phosphate1 (Pho1) expression in response to low phosphate (Pi) stress.	1.95283	1.26e-15	UP
AT1G12672	NA	NA	1.94963	0.010543	UP
AT1G63440	HMA5	The Arabidopsis P-type ATPase HMA5 is involved in Cu detoxification. hma5 mutant plants exhibit Cu hypersensitivity, which is especially dramatic in roots where HMA5 is mostly expressed.	1.94853	3.16988e-13	UP
AT5G18180	NA	NA	1.94686	0.00695186	UP
AT4G39955	NA	NA	1.94644	1.38873e-19	UP
AT3G63060	EDL3	NA	1.94606	3.8648e-05	UP
AT2G16900	NA	NA	1.94454	1.04637e-20	UP
AT1G33110	NA	NA	1.94302	1.3277e-19	UP
AT1G69570	CDF5	NA	1.94061	6.16365e-16	UP
AT3G05360	AtRLP30	NA	1.94045	9.47444e-12	UP
AT1G28130	GH3.17	encodes an IAA-amido synthase that conjugates Asp and other amino acids to auxin in vitro. Lines carrying insertions in this gene are hypersensitive to auxin.	1.93809	3.7439e-06	UP
AT5G55410	NA	NA	1.93697	0.0340835	UP
AT3G60961	NA	NA	1.93686	0.000323859	UP
AT1G76760	ATY1	Encodes a y-type thioredoxin (Trx-y1) localized in chloroplast stroma.	1.93569	8.11341e-08	UP
AT1G56170	ATHAP5B	Encodes a protein with similarity to a subunit of the CCAAT promoter motif binding complex of yeast.One of two members of this class (HAP5B) and expressed in vegetative and reproductive tissues	1.9354	1.42669e-12	UP
AT1G06180	ATMYB13	member of MYB3R- and R2R3- type MYB- encoding genes	1.93453	1.01025e-07	UP
AT2G41190	NA	NA	1.93368	2.0473e-11	UP
AT2G38860	DJ-1e	Encodes protease I (pfpI)-like protein YLS5.	1.93316	1.06045e-26	UP
AT2G19650	NA	NA	1.93212	3.51562e-19	UP
AT1G09537	NA	NA	1.93154	0.013898	UP
AT5G44610	MAP18	Encodes a protein with seven repeated VEEKK motifs. RNAi and overexpression experiments suggest that the gene is not involved in cell division but might be consequential for cell shape of epidermal and cortical cells. The protein encoded by this gene binds to cortical microtubules and inhibits tubulin polymerization. Associates to the plasma membrane and interacts with calmodulin and phosphatidyl…	1.93012	0.000303637	UP
AT5G02490	AtHsp70-2	NA	1.93004	5.01619e-15	UP
AT1G60960	ATIRT3	Encodes a plasma membrane localized zinc/iron transporter.	1.92858	3.63792e-24	UP
AT1G57590	AtPAE2	NA	1.92811	1.28477e-09	UP
AT2G35000	ATL2G	E3 ligase-like protein induced by chitin oligomers.	1.9272	2.49734e-07	UP
AT4G33540	NA	NA	1.92699	1.3856e-35	UP
AT5G46871	NA	Encodes a defensin-like (DEFL) family protein.	1.92627	1.51588e-18	UP
AT5G62130	NA	NA	1.92578	1.16937e-29	UP
AT3G48300	CYP71A23	putative cytochrome P450	1.92567	0.0384536	UP
AT4G23280	CRK20	Encodes a cysteine-rich receptor-like protein kinase.	1.92167	4.89681e-11	UP
AT3G11080	AtRLP35	NA	1.92137	1.81209e-13	UP
AT4G03320	AtTic20-IV	NA	1.92021	3.81856e-12	UP
AT2G23620	ATMES1	Encodes a protein shown to have carboxylesterase activity, methyl salicylate esterase activity, methyl jasmonate esterase activity, and methyl IAA esterase activity in vitro. MES1 appears to be involved in MeSA hydrolysis in planta. Expression of MES1 can restore systemic acquired resistance in SAR-deficient tobacco plants. This protein does not act on MeGA4, or MEGA9 in vitro.	1.92005	0.00396289	UP
AT1G05340	AthCYSTM1	NA	1.91677	3.96333e-06	UP
AT3G28580	NA	NA	1.91597	3.36245e-17	UP
AT2G28510	DOF2.1	NA	1.91467	1.0609e-31	UP
AT3G04420	anac048	NA	1.91338	0.0023456	UP
AT2G33710	NA	encodes a member of the ERF (ethylene response factor) subfamily B-4 of ERF/AP2 transcription factor family. The protein contains one AP2 domain. There are 7 members in this subfamily.	1.91216	0.000168159	UP
AT2G41010	ATCAMBP25	Encodes a novel calmodulin binding protein whose gene expression is induced by dehydration and ionic (salt) and non-ionic (mannitol) osmotic stress. Lines over-expressing this gene are more sensitive and anti-sense lines are more tolerant to osmotic stress, suggesting this gene may be a negative regulator of response to osmotic stress.	1.90914	1.01712e-12	UP
AT3G23250	ATMYB15	Member of the R2R3 factor gene family.	1.90827	0.00293795	UP
AT1G02310	MAN1	NA	1.90624	0.0155662	UP
AT5G42010	NA	NA	1.90604	8.7326e-19	UP
AT3G63050	NA	NA	1.90453	9.0065e-06	UP
AT4G04960	LecRK-VII.1	NA	1.9044	7.01258e-37	UP
AT1G12940	ATNRT2.5	member of High affinity nitrate transporter family	1.90198	1.87736e-08	UP
AT2G02390	ATGSTZ1	Encodes glutathione transferase belonging to the zeta class of GSTs. Naming convention according to Wagner et al. (2002). The protein undergoes spontaneous thiolation following treatment with the oxidant tert-butylhydroperoxide.	1.90091	1.46612e-40	UP
AT1G66725	NA	NA	1.89992	8.87895e-10	UP
AT1G78290	SNRK2-8	NA	1.89933	8.43643e-26	UP
AT5G46050	AtNPF5.2	Encodes a di- and tri-peptide transporter involved in responses to wounding, virulent bacterial pathogens, and high NaCl concentrations. The protein is predicted to have 12 transmembrane helicies.	1.89891	3.87533e-13	UP
AT1G74710	ATICS1	Encodes a protein with isochorismate synthase activity. Mutants fail to accumulate salicylic acid. Its function may be redundant with that of ICS2 (AT1G18870).	1.89384	1.6867e-14	UP
AT2G47550	NA	NA	1.89361	0.0122267	UP
AT1G10410	NA	NA	1.89144	1.4295e-39	UP
AT1G10540	ATNAT8	NA	1.88751	0.0152588	UP
AT1G02360	NA	NA	1.88511	5.50257e-21	UP
AT5G39050	PMAT1	NA	1.88387	7.81735e-14	UP
AT2G36780	NA	NA	1.88303	9.57462e-11	UP
AT2G23150	ATNRAMP3	Encodes a member of the Nramp2 metal transporter family; like its homolog Atnramp4, localized in vacuolar membrane. Seedlings of double mutant, atnramp3-1 atnramp4-1, were arrested at early germination.	1.88262	1.06458e-20	UP
AT2G44380	NA	NA	1.88235	4.64528e-12	UP
AT4G20460	NA	NA	1.88125	7.1727e-11	UP
AT1G27980	ATDPL1	NA	1.8797	4.66596e-29	UP
AT4G19975	NA	NA	1.87773	7.61266e-09	UP
AT5G65870	ATPSK5	Probable phytosulfokines 5 precursor, coding for a unique plant peptide growth factor.	1.87703	2.13973e-08	UP
AT1G67360	LDAP1	NA	1.87656	5.13621e-20	UP
AT1G68290	AtBFN2	Encodes a putative endonuclease but no demonstrable endonuclease activity, either towards single stranded DNA or mismatches, has been seen in vitro.	1.87492	0.00247221	UP
AT5G17350	NA	NA	1.87098	2.66322e-06	UP
AT2G27660	NA	NA	1.86977	4.08303e-12	UP
AT2G38870	NA	Predicted to encode a PR (pathogenesis-related) peptide that belongs to the PR-6 proteinase inhibitor family. Six putative PR-6-type protein encoding genes are found in Arabidopsis: At2g38900, At2g38870, At5g43570, At5g43580, At3g50020 and At3g46860.	1.86736	7.84487e-23	UP
AT3G13435	NA	NA	1.86546	0.0285866	UP
AT3G28540	NA	NA	1.86503	3.26039e-26	UP
AT1G76130	AMY2	alpha-amylase, putative / 1,4-alpha-D-glucan glucanohydrolase, putative, strong similarity to alpha-amylase GI:7532799 from (Malus x domestica);contains Pfam profile PF00128: Alpha amylase, catalytic domain. Predicted to be secreted based on SignalP analysis.	1.86427	2.84579e-16	UP
AT3G44720	ADT4	Encodes a plastid-localized arogenate dehydratase involved in phenylalanine biosynthesis. Not less than six genes encoding ADT were identi&#64257;ed in the Arabidopsis genome: ADT1 [At1g11790]; ADT2 [At3g07630]; ADT3 [At2g27820]; ADT4 [At3g44720]; ADT5 [At5g22630]; and ADT6 [At1g08250].	1.86411	9.125e-17	UP
AT2G24850	TAT	Encodes a tyrosine aminotransferase that is responsive to treatment with jasmonic acid.	1.86392	0.000329918	UP
AT5G47960	ATRABA4C	Encodes a small molecular weight g-protein.	1.86347	3.16248e-05	UP
AT5G06530	ABCG22	NA	1.86278	4.09762e-64	UP
AT3G20660	AtOCT4	NA	1.86224	5.36749e-11	UP
AT5G46230	NA	NA	1.86105	8.86345e-21	UP
AT5G35580	PBL13	NA	1.86043	1.83356e-06	UP
AT3G57020	NA	NA	1.86013	3.72262e-38	UP
AT3G13433	NA	NA	1.86002	3.17835e-06	UP
AT4G27850	NA	NA	1.85887	0.000137351	UP
AT4G21390	B120	NA	1.85782	1.06449e-11	UP
AT5G67140	NA	NA	1.85773	6.49356e-18	UP
AT5G43860	ATCLH2	Encodes a chlorophyllase, the first enzyme in chlorophyll degradation. It catalyzes the hydrolysis of the ester bond to chlorophyllide and phytol. AtCLH2 has a typical signal sequence for the chloroplast. Gene expression does not respond to methyljasmonate, a known promoter of senescence and chlorophyll degradation.	1.8576	6.74944e-12	UP
AT4G04510	CRK38	Encodes a cysteine-rich receptor-like protein kinase.	1.85589	5.16905e-13	UP
AT2G06185	NA	NA	1.85574	0.0229348	UP
AT3G63380	ACA12	NA	1.8519	1.64747e-10	UP
AT4G25390	NA	NA	1.85006	1.16497e-16	UP
AT5G48560	CIB2	NA	1.84441	1.27717e-14	UP
AT1G51670	HTT5	NA	1.8443	0.0267634	UP
AT1G21240	WAK3	encodes a wall-associated kinase	1.8422	1.23786e-14	UP
AT5G24870	NA	NA	1.84185	3.48409e-23	UP
AT2G30750	CYP71A12	putative cytochrome P450	1.84018	7.19143e-16	UP
AT2G39410	MAGL7	NA	1.83941	0.000178942	UP
AT1G69310	ATWRKY57	member of WRKY Transcription Factor; Group II-c	1.83706	1.635e-10	UP
AT5G45630	NA	NA	1.83647	0.000366966	UP
AT2G40435	NA	NA	1.83529	7.92424e-08	UP
AT4G35380	BIG4	NA	1.83472	8.31564e-07	UP
AT1G80450	NA	NA	1.83456	8.99302e-19	UP
AT1G21400	NA	NA	1.83444	2.52315e-31	UP
AT5G25920	NA	NA	1.83224	0.0406945	UP
AT5G60250	NA	NA	1.83159	0.000586762	UP
AT2G32140	NA	NA	1.82996	6.68952e-12	UP
AT3G15990	SULTR3;4	Encodes sulfate transporter Sultr3;4.	1.82986	1.63624e-06	UP
AT4G18990	XTH29	NA	1.82878	3.14647e-08	UP
AT4G26990	NA	NA	1.8283	5.48468e-20	UP
AT3G09795	NA	NA	1.82807	0.011057	UP
AT3G13900	ALA7	NA	1.82731	0.00405352	UP
AT1G23120	NA	NA	1.82673	0.00599693	UP
AT3G14280	NA	NA	1.82571	2.14652e-22	UP
AT3G07600	NA	NA	1.82535	1.1202e-05	UP
AT2G29090	CYP707A2	Encodes a protein with ABA 8'-hydroxylase activity, involved in ABA catabolism. Member of the CYP707A gene family. This gene predominantly accumulates in dry seeds and is up-regulated immediately following imbibition. CYP707A2 appears to play a major role in the rapid decrease in ABA levels during early seed imbibition.	1.82463	7.42781e-21	UP
AT3G61990	OMTF3	NA	1.82367	2.91266e-08	UP
AT5G25140	CYP71B13	putative cytochrome P450	1.82364	2.27038e-23	UP
AT2G20560	DNAJ	NA	1.82216	5.35417e-18	UP
AT3G03310	ATLCAT3	NA	1.82172	8.7106e-28	UP
AT3G04220	NA	NA	1.82076	2.11303e-13	UP
AT1G14780	NA	NA	1.82026	3.1022e-14	UP
AT4G01700	NA	NA	1.81665	4.57703e-23	UP
AT1G66700	NA	NA	1.81627	1.44101e-09	UP
AT5G64790	NA	NA	1.81433	0.0201487	UP
AT5G25820	NA	NA	1.81425	3.39375e-16	UP
AT1G07590	NA	NA	1.81174	6.97185e-65	UP
AT2G29440	ATGSTU6	Encodes glutathione transferase belonging to the tau class of GSTs. Naming convention according to Wagner et al. (2002).	1.80901	6.78204e-05	UP
AT1G65870	NA	NA	1.80899	1.49098e-08	UP
AT1G74290	NA	NA	1.80791	3.33071e-10	UP
AT3G19660	NA	NA	1.80595	1.10036e-19	UP
AT5G36925	ARACIN1	NA	1.80559	8.69694e-06	UP
AT5G09800	NA	NA	1.80415	2.842e-08	UP
AT3G25640	NA	NA	1.80054	1.20584e-05	UP
AT3G21690	NA	NA	1.79978	8.69607e-26	UP
AT4G00700	MCTP9	NA	1.79461	4.44979e-15	UP
AT5G05995	NA	NA	1.79385	0.00189177	UP
AT2G39050	ArathEULS3	NA	1.79343	6.09345e-16	UP
AT5G05730	AMT1	ASA1 encodes the alpha subunit of anthranilate synthase, which catalyzes the rate-limiting step of tryptophan synthesis. ASA1 is induced by ethylene, and forms a link between ethylene signalling and auxin synthesis in roots.	1.79195	9.53401e-28	UP
AT1G74930	ORA47	encodes a member of the DREB subfamily A-5 of ERF/AP2 transcription factor family. The protein contains one AP2 domain. There are 15 members in this subfamily including RAP2.1, RAP2.9 and RAP2.10.	1.79054	0.00721543	UP
AT4G01070	GT72B1	the glycosyltransferase (UGT72B1) is involved in metabolizing xenobiotica (chloroaniline and chlorophenole). Comparison between wild type and knock-out mutant demonstrates the central role of this gene for metabolizing chloroaniline but significantly less for chlorophenole. The glucosyltransferase preferred UDP-xylose over UDP-glucose indicating its (additional) functioning as a xylosyltransferas…	1.78822	1.48585e-24	UP
AT5G07150	NA	NA	1.78582	5.02092e-06	UP
AT1G59590	ZCF37	ZCF37 mRNA, complete cds	1.78526	1.10083e-11	UP
AT5G52570	B2	Converts &#946;-carotene to zeaxanthin via cryptoxanthin.	1.78486	5.59972e-09	UP
AT5G54160	AtCOMT	A caffeic acid/5-hydroxyferulic acid O-methyltransferase. Interacts with 14-4-3 proteins in yeast 2 hybrid assay. AtOMT1 (At5g54160) encodes a flavonol 3-O-methyltransferase that is highly active towards quercetin and myricetin. The substrate specificity identifies the enzyme as flavonol 3-methyltransferase which replaces the former annotation of the gene to encode a caffeic acid/5-hydroxyferulic…	1.78434	8.32551e-16	UP
AT2G35930	AtPUB23	Encodes a cytoplasmically localized U-box domain containing E3 ubiquitin ligase that is involved in the response to water stress and acts as a negative regulator of PAMP-triggered immunity.	1.78399	2.33959e-11	UP
AT1G48745	NA	NA	1.78288	3.69586e-11	UP
AT4G22920	ATNYE1	Similar to the tomato senescence-inducible chloroplast stay-green protein 1. It is upregulated during maximal senescence in the Arabidopsis life cycle, especially in senescent leaves.	1.7827	3.20384e-33	UP
AT1G68200	AtC3H15	NA	1.78223	2.91987e-05	UP
AT5G46180	DELTA-OAT	Encodes an ornithine delta-aminotransferase that is transcriptionally up-regulated in young seedlings and in response to salt stress. It is unlikely to play a role in salt-stress-induced proline accumulation, however, it appears to participate in arginine and ornithine catabolism.	1.78046	2.93987e-38	UP
AT4G20000	NA	NA	1.77742	1.78951e-10	UP
AT2G19570	AT-CDA1	Encodes a cytidine deaminase that deaminates cytidine and deoxycytidine and is competitively inhibited by cytosine-containing compounds.	1.77504	6.95916e-30	UP
AT5G64810	ATWRKY51	member of WRKY Transcription Factor; Group II-c	1.77495	4.83509e-11	UP
AT5G07440	GDH2	Encodes the beta-subunit of the glutamate dehydrogenase. The enzyme is almost exclusively found in the mitochondria of stem and leaf companion cells.	1.77483	9.4996e-25	UP
AT5G37550	NA	NA	1.77444	0.0148244	UP
AT1G01070	UMAMIT28	NA	1.77392	1.46506e-10	UP
AT1G31885	NA	NA	1.7728	0.0170069	UP
AT3G62260	NA	NA	1.77225	5.57952e-13	UP
AT4G25070	NA	NA	1.77216	2.73635e-14	UP
AT1G03220	SAP2	NA	1.77141	2.65595e-37	UP
AT1G16730	UP6	NA	1.77044	1.35093e-16	UP
AT5G54470	BBX29	NA	1.76989	5.03027e-09	UP
AT3G04040	NA	NA	1.76961	1.30008e-05	UP
AT2G18950	ATHPT	Encodes homogentisate phytyltransferase involved in tocopherol biosynthesis. Has impact on seed longevity and plays a role in the adaptation to low temperature stress, notably phloem loading.	1.76921	7.38702e-42	UP
AT4G19370	MWL-2	NA	1.76814	1.97939e-09	UP
AT3G55700	NA	NA	1.76601	8.7943e-07	UP
AT3G23630	ATIPT7	Encodes an isopentenyl transferase involved in cytokinin biosynthesis.	1.76397	0.00391736	UP
AT5G22550	NA	NA	1.76238	0.000994211	UP
AT2G35910	NA	NA	1.76224	7.0142e-07	UP
AT4G29740	ATCKX4	It encodes a protein whose sequence is similar to cytokinin oxidase/dehydrogenase, which catalyzes the degradation of cytokinins.	1.7611	4.54401e-17	UP
AT4G01985	NA	NA	1.76011	0.00145673	UP
AT3G56170	CAN	Encodes a calcium-dependent nuclease with similarity to staphylococcal nuclease.	1.76007	2.51988e-50	UP
AT4G34860	A/N-InvB	NA	1.75825	2.69182e-14	UP
AT1G03840	IDD3	MGP is a nuclear-localized putative transcription factor with three zinc finger domains. MGP can interact with three proteins implicated in root patterning: SCR, SHR, and JKD in Y2H assays, and these interactions depend on the first zinc finger in MGP. MGP appears to be a direct transcriptional target of SHR and SCR, based on promoter binding assays, though it is not expressed in the QC, based on…	1.75789	0.0226598	UP
AT3G10420	SPD1	NA	1.75681	1.12134e-52	UP
AT2G04070	NA	NA	1.75612	4.72467e-15	UP
AT2G05940	RIPK	NA	1.75552	2.02593e-20	UP
AT3G51440	NA	NA	1.75417	3.46737e-15	UP
AT5G12930	NA	NA	1.75151	2.57761e-12	UP
AT3G51430	SSL5	Although this enzyme is predicted to encode a strictosidine synthase (SS), it lacks a conserved catalytic glutamate residue found in active SS enzymes and it is not expected to have SS activity.	1.75038	9.68684e-20	UP
AT2G32530	ATCSLB03	encodes a gene similar to cellulose synthase	1.75027	3.81464e-27	UP
AT1G69810	ATWRKY36	member of WRKY Transcription Factor; Group II-b	1.74863	4.14234e-08	UP
AT3G03440	NA	NA	1.74791	4.53746e-17	UP
AT2G41640	NA	NA	1.74771	8.29028e-19	UP
AT1G08050	NA	NA	1.74503	2.63273e-20	UP
AT2G04050	NA	NA	1.74388	2.35191e-05	UP
AT5G61820	NA	NA	1.74334	5.21734e-23	UP
AT2G29100	ATGLR2.9	member of Putative ligand-gated ion channel subunit family	1.74263	1.64542e-07	UP
AT2G02060	NA	NA	1.74212	6.1477e-11	UP
AT1G14880	AtPCR1	NA	1.74173	2.5784e-17	UP
AT4G07165	NA	NA	1.73982	1.07664e-05	UP
AT5G61900	BON	Encodes a plasma-membrane localized, copine-like protein, which is a member of a newly identified class of calcium-dependent, phospholipid binding proteins that are present in a wide range of organisms. Mutants exhibit temperature-sensitive growth defects and increased hypersensitive response where permissive conditions are low temperature (22 degrees Celsius) and low humidity. Gene is expressed …	1.73895	7.92514e-14	UP
AT1G13550	NA	NA	1.73775	2.38393e-06	UP
AT3G13790	ATBFRUCT1	Encodes a protein with invertase activity.	1.73735	2.73378e-13	UP
AT5G54610	ANK	Induced in response to Salicylic acid. Belongs to the ankyrin repeat protein family.	1.73675	9.39721e-27	UP
AT4G18870	NA	NA	1.73632	0.000231317	UP
AT1G10155	ATPP2-A10	NA	1.73466	0.00803327	UP
AT4G33070	AtPDC1	NA	1.73443	0.0393724	UP
AT3G12220	scpl16	NA	1.73431	3.41223e-19	UP
AT5G15860	ATPCME	Encodes a protein with prenylcysteine methylesterase activity.	1.73413	1.61347e-21	UP
AT4G23200	CRK12	Encodes a cysteine-rich receptor-like protein kinase.	1.73308	2.62405e-13	UP
AT4G15120	NA	NA	1.73241	3.84793e-05	UP
AT3G53150	UGT73D1	NA	1.73193	6.16794e-09	UP
AT5G44572	NA	NA	1.73146	4.05559e-22	UP
AT1G30620	HSR8	encodes a type-II membrane protein that catalyzes 4-epimerization of UDP-D-Xylose to UDP-L-Arabinose in vitro, the nucleotide sugar used by glycosyltransferases in the arabinosylation of cell wall polysaccharides and wall-resident proteoglycans.	1.73121	3.94054e-14	UP
AT2G03450	ATPAP9	NA	1.73068	3.2062e-22	UP
AT1G65850	NA	NA	1.72988	0.0390299	UP
AT4G04490	CRK36	Encodes a cysteine-rich receptor-like protein kinase.	1.72954	2.93267e-14	UP
AT1G78190	AtTRM112a	NA	1.72889	2.12105e-06	UP
AT5G46080	NA	NA	1.72831	6.00993e-12	UP
AT4G12120	ATSEC1B	member of KEULE Gene Family	1.7277	1.15961e-17	UP
AT5G47130	NA	NA	1.72671	1.36417e-17	UP
AT4G12735	NA	NA	1.72586	0.00349607	UP
AT4G17670	NA	NA	1.72497	1.65498e-14	UP
AT1G02920	ATGST11	Encodes glutathione transferase belonging to the phi class of GSTs. Naming convention according to Wagner et al. (2002).	1.72389	2.8153e-11	UP
AT5G35370	NA	NA	1.72274	9.77907e-23	UP
AT5G42830	NA	NA	1.72126	5.267e-12	UP
AT5G48820	ICK6	Kip-related protein (KRP) gene, encodes CDK (cyclin-dependent kinase) inhibitor (CKI), negative regulator of cell division. Binds to D type and CDC2A cyclins and may inhibit cell cycle. Seven KRP genes were found in Arabidopsis thaliana. Differential expression patterns for distinct KRPs were revealed by in situ hybridization.	1.72118	0.00894834	UP
AT2G32190	AthCYSTM4	NA	1.72115	1.2009e-06	UP
AT3G15534	NA	NA	1.72073	1.23026e-05	UP
AT5G06320	NHL3	encodes a protein whose sequence is similar to tobacco hairpin-induced gene (HIN1) and Arabidopsis non-race specific disease resistance gene (NDR1). Expression of this gene is induced by cucumber mosaic virus, spermine and Pseudomonas syringae pv. tomato DC3000. The gene product is localized to the plasma membrane.	1.71962	9.15068e-17	UP
AT1G03055	AtD27	NA	1.71853	3.35881e-08	UP
AT3G54150	EFD	NA	1.71563	2.3332e-06	UP
AT4G04972	NA	NA	1.71484	0.0167708	UP
AT4G27940	ATMTM1	NA	1.71463	2.26681e-16	UP
AT5G41080	AtGDPD2	NA	1.71431	0.0176245	UP
AT5G48530	NA	NA	1.71392	3.61646e-10	UP
AT5G15950	SAMDC2	NA	1.71319	2.01995e-20	UP
AT4G20970	NA	NA	1.71202	3.26447e-05	UP
AT3G05390	NA	NA	1.71128	7.53576e-05	UP
AT3G29034	NA	NA	1.71119	6.15578e-14	UP
AT4G39950	CYP79B2	Belongs to cytochrome P450 and is involved in tryptophan metabolism. Converts Trp to indo-3-acetaldoxime (IAOx), a precursor to IAA and indole glucosinolates.	1.71081	3.69207e-16	UP
AT5G23730	EFO2	NA	1.71028	2.05873e-11	UP
AT5G55050	NA	NA	1.70678	2.56495e-08	UP
AT2G41660	MIZ1	Essential for hydrotropism in roots. Mutant roots are defective in hydrotropism, and have slightly reduced phototropism and modified wavy growth response. Has normal gravitropism and root elongation.	1.70418	4.67487e-06	UP
AT3G43250	NA	NA	1.70401	0.0458584	UP
AT2G40180	ATHPP2C5	Encodes PP2C5, a member of the PP2C family phosphatases. PP2C5 acts as a MAPK phosphatase that positively regulates seed germination, stomatal closure and ABA-inducible gene expression.	1.70365	2.92541e-06	UP
AT3G02230	ATRGP1	reversibly glycosylated polypeptide possibly involved in plant cell wall synthesis	1.70278	1.13393e-26	UP
AT1G05710	NA	NA	1.70237	1.21287e-12	UP
AT1G03850	ATGRXS13	NA	1.70205	6.97091e-14	UP
AT5G24030	SLAH3	Encodes a protein with ten predicted transmembrane helices. The SLAH3 protein has similarity to the SLAC1 protein involved in ion homeostasis in guard cells. Although it is not expressed in guard cells, it can complement an slac1-2 mutant suggesting that it performs a similar function. SLAH3:GFP localizes to the plasma membrane.	1.70095	8.61491e-17	UP
AT1G23060	MDP40	NA	1.70071	2.10375e-05	UP
AT1G62660	VI1	NA	1.7002	1.17049e-09	UP
AT5G05365	NA	NA	1.6978	0.00740316	UP
AT4G08555	NA	NA	1.69689	4.76577e-05	UP
AT1G48260	CIPK17	Encodes a member of the SNF1-related kinase (SnRK) gene family (SnRK3.21), which has also been reported as a member of the CBL-interacting protein kinases (CIPK17).	1.69602	4.0235e-06	UP
AT2G47270	UPB1	NA	1.69506	0.00324174	UP
AT5G11520	ASP3	Encodes the chloroplastic isozyme of aspartate aminotransferase. Involved in aspartate biosynthesis and nitrogen metabolism. mRNA is expressed in senescing leaves.	1.69398	7.45543e-61	UP
AT3G50480	HR4	Homolog of RPW8	1.69194	1.18703e-21	UP
AT5G25770	NA	NA	1.68838	6.53392e-21	UP
AT1G76070	NA	NA	1.68802	4.50695e-10	UP
AT1G22930	NA	NA	1.68797	6.44317e-44	UP
AT1G07890	APX1	Encodes a cytosolic ascorbate peroxidase APX1. Ascorbate peroxidases are enzymes that scavenge hydrogen peroxide in plant cells. Eight types of APX have been described for Arabidopsis: three cytosolic (APX1, APX2, APX6), two chloroplastic types (stromal sAPX, thylakoid tAPX), and three microsomal (APX3, APX4, APX5) isoforms. At least part of the induction of heat shock proteins during light stres…	1.68674	1.01583e-34	UP
AT4G35180	LHT7	NA	1.6865	2.46276e-09	UP
AT2G30550	DALL3	Encodes a lipase that hydrolyzes phosphatidylcholine, glycolipids as well as triacylglycerols.	1.68581	6.39862e-10	UP
AT3G21700	ATSGP2	Monomeric G protein. Expressed in root epidermal cells that are destined to become atrichoblasts. Also expressed during pollen development and in the pollen tube tip.	1.6856	5.13159e-14	UP
AT1G55610	BRL1	mutant has Altered vascular cell differentiation; LRR Receptor Kinase	1.68213	9.27124e-29	UP
AT2G25440	AtRLP20	NA	1.68116	2.07642e-07	UP
AT3G17810	PYD1	Encodes a protein predicted to have dihydropyrimidine dehydrogenase activity. Its activity has not been demonstrated in vivo, but, it is required for efficient uracil catabolism in Arabidopsis. It localizes to the plastid.	1.68072	1.67433e-27	UP
AT3G45330	LecRK-I.1	NA	1.68005	2.7492e-09	UP
AT3G50770	CML41	NA	1.67832	9.02545e-14	UP
AT5G15870	NA	NA	1.67828	2.46572e-20	UP
AT5G46295	NA	NA	1.67769	0.0059707	UP
AT2G46150	NA	NA	1.67587	5.09901e-06	UP
AT1G61560	ATMLO6	A member of a large family of seven-transmembrane domain proteins specific to plants, homologs of the barley mildew resistance locus o (MLO) protein. The Arabidopsis genome contains 15 genes encoding MLO proteins, with localization in plasma membrane. Phylogenetic analysis revealed four clades of closely-related AtMLO genes. ATMLO6 belongs to the clade IV, with AtMLO2, AtMLO3 and AtMLO12. The gen…	1.6752	7.74465e-11	UP
AT1G20310	NA	NA	1.67516	0.000493734	UP
AT5G03210	AtDIP2	NA	1.67497	0.0268145	UP
AT3G17690	ATCNGC19	member of Cyclic nucleotide gated channel family	1.67461	3.16376e-06	UP
AT5G06980	LNK4	NA	1.67388	3.75452e-23	UP
AT2G41905	NA	NA	1.67275	3.40466e-07	UP
AT5G09290	NA	NA	1.67196	1.27871e-14	UP
AT1G72120	AtNPF5.14	NA	1.67115	9.25306e-09	UP
AT1G19200	NA	NA	1.67063	1.94486e-05	UP
AT1G52315	ISTL9	NA	1.66895	3.98569e-05	UP
AT2G16430	ATPAP10	NA	1.6685	1.90312e-55	UP
AT5G40210	UMAMIT42	NA	1.66746	0.00228465	UP
AT1G68740	PHO1;H1	Encodes PHO1;H1, a member of the PHO1 family. Involved in inorganic phosphate (Pi) transport and homeostasis. Complements pho1 mutation.	1.66432	1.14592e-11	UP
AT3G27330	NA	NA	1.66375	6.1264e-12	UP
AT1G55265	NA	NA	1.66353	4.50435e-28	UP
AT5G16230	AAD3	NA	1.66203	8.16767e-10	UP
AT5G07680	ANAC079	NA	1.66158	0.00752479	UP
AT1G29300	UNE1	NA	1.66082	1.13477e-13	UP
AT1G02390	ATGPAT2	Encodes a member of a family of proteins with glycerol-3-phosphate acyltransferase activity.	1.65802	5.35121e-17	UP
AT1G55920	AtSAT1	Encodes a chloroplast/cytosol localized serine O-acetyltransferase involved in sulfur assimilation and cysteine biosynthesis. Expressed in the vascular system.	1.65573	6.19792e-37	UP
AT1G68710	NA	NA	1.65532	7.66721e-29	UP
AT5G02270	ABCI20	member of NAP subfamily	1.65486	6.58706e-25	UP
AT5G65380	NA	NA	1.65411	1.64864e-21	UP
AT4G24120	ATYSL1	Member of a small family of oligopeptide transporters similar to the yellow stripe locus of maize (ZmYS1).	1.65078	3.59649e-21	UP
AT1G73870	BBX16	NA	1.64989	5.08368e-18	UP
AT2G21185	NA	NA	1.64875	8.12071e-33	UP
AT4G04500	CRK37	Encodes a cysteine-rich receptor-like protein kinase.	1.64579	2.40008e-13	UP
AT4G27652	NA	NA	1.64454	3.19841e-06	UP
AT2G15490	UGT73B4	NA	1.64309	0.000750615	UP
AT2G36770	NA	NA	1.64307	0.000110365	UP
AT2G23830	PVA31	NA	1.64272	1.93613e-06	UP
AT1G03820	NA	NA	1.64237	2.46052e-13	UP
AT2G43820	ATSAGT1	Induced by Salicylic acid, virus, fungus and bacteria.Involved in the tryptophan synthesis pathway. Independent of NPR1 for their induction by salicylic acid. UGT74F1 transfers UDP:glucose to salicylic acid (forming a glucoside (SAG) and a glucose ester (SGE)), benzoic acid, and athranilate in vitro. UGT74F2 shows a weak ability to catalyze the formation of the p-aminobenzoate-glucose ester in vi…	1.64178	3.07875e-18	UP
AT5G25250	FLOT1	NA	1.63937	1.42583e-12	UP
AT4G30190	AHA2	belongs to the P-type ATPase superfamily of cation-transporting ATPases, pumps protons out of the cell, generating a proton gradient that drives the active transport of nutrients by proton symport. has two autoinhibitory regions within the C-terminal dom	1.63828	3.8237e-108	UP
AT4G08300	UMAMIT17	NA	1.63752	4.91711e-10	UP
AT2G28710	NA	NA	1.63694	2.91677e-05	UP
AT1G21390	emb2170	NA	1.63469	4.1668e-16	UP
AT1G49000	NA	NA	1.63415	3.25389e-12	UP
AT2G28350	ARF10	Involved in root cap cell differentiation.	1.63205	4.0413e-15	UP
AT3G19450	ATCAD4	Encodes a catalytically active cinnamyl alcohol dehydrogenase which uses p-coumaryl aldehyde as a preferred substrate. It can also use caffeyl, coniferyl and d-hydroxyconiferyl aldehydes as substrates.	1.63088	3.12845e-55	UP
AT1G72200	NA	NA	1.63085	0.00345395	UP
AT4G31800	ATWRKY18	Pathogen-induced transcription factor. Binds W-box sequences in vitro. Forms protein complexes with itself and with WRKY40 and WRKY60. Constitutive expression of WRKY18 enhanced resistance to P. syringae, but its coexpression with WRKY40 or WRKY60 made plants more susceptible to both P. syringae and B. cinerea. WRKY18, WRKY40, and WRKY60 have partially redundant roles in response to the hemibiotr…	1.62993	4.53998e-10	UP
AT1G62180	2022-04-02	encodes a adenosine 5'-phosphosulfate reductase, involved in sulfate assimilation. Is a major effect locus for natural variation of shoot sulfate content in Arabidopsis.	1.62901	1.17555e-51	UP
AT5G62180	AtCXE20	NA	1.62518	1.93867e-12	UP
AT2G47140	AtSDR5	NA	1.62422	5.38968e-06	UP
AT4G14450	PH1	NA	1.62412	8.33321e-05	UP
AT5G20000	NA	NA	1.62388	4.58088e-29	UP
AT4G11280	ACS6	encodes a a member of the 1-aminocyclopropane-1-carboxylate (ACC) synthase (S-adenosyl-L-methionine methylthioadenosine-lyase, EC 4.4.1.14) gene family	1.62309	3.94117e-14	UP
AT1G63720	NA	NA	1.62031	1.35452e-11	UP
AT4G26220	CCoAOMT7	NA	1.61831	0.00790831	UP
AT3G02040	AtGDPD1	NA	1.6152	9.99991e-11	UP
AT3G13910	NA	NA	1.61511	2.94258e-29	UP
AT1G08477	NA	NA	1.6147	2.45721e-26	UP
AT2G31160	LSH3	NA	1.61447	0.0311276	UP
AT1G27300	NA	NA	1.61301	6.71018e-15	UP
AT1G70170	At2-MMP	mutant has Late flowering; Early senescence; Matrix Metalloproteinase	1.6105	0.00232838	UP
AT4G39780	NA	encodes a member of the DREB subfamily A-6 of ERF/AP2 transcription factor family. The protein contains one AP2 domain. There are 8 members in this subfamily including RAP2.4.	1.61049	7.04147e-11	UP
AT1G11100	FRG5	NA	1.60884	5.7513e-05	UP
AT5G51465	NA	NA	1.60793	1.42122e-07	UP
AT4G21840	ATMSRB8	NA	1.60634	7.02345e-10	UP
AT1G27720	TAF4	NA	1.60434	0.00526381	UP
AT3G44350	anac061	NA	1.60301	1.41732e-06	UP
AT1G02850	BGLU11	NA	1.60288	2.49851e-12	UP
AT3G26590	NA	NA	1.60285	6.55016e-46	UP
AT1G74360	GRACE	NA	1.60193	6.78812e-12	UP
AT5G11110	ATSPS2F	Encodes a protein with putative sucrose-phosphate synthase activity.Involved in pollen exine formation.	1.60093	3.72385e-12	UP
AT3G22060	NA	contains Pfam profile: PF01657 Domain of unknown function that is usually associated with protein kinase domain Pfam:PF00069, however this protein does not have the protein kinase domain	1.60087	4.3009e-24	UP
AT1G32928	NA	NA	1.59983	2.17139e-05	UP
AT1G62960	ACS10	Encodes an aminotransferase with broad specificity for aspartate and aromatic amino aids such as tyrosine and phenylalanine. It does not act on branched chain amino acids and does not have ACC synthase activity.	1.59894	2.96713e-40	UP
AT4G34131	UGT73B3	NA	1.59728	5.29002e-08	UP
AT2G34600	JAZ7	NA	1.59584	0.00112711	UP
AT3G04720	AtPR4	Encodes a protein similar to the antifungal chitin-binding protein hevein from rubber tree latex. mRNA levels increase in response to ethylene and turnip crinkle virus infection.	1.5948	5.76992e-21	UP
AT1G71040	LPR2	Encodes LPR2. Function together with LPR1 (AT1G23010) and a P5-type ATPase (At5g23630/PDR2) in a common pathway that adjusts root meristem activity to Pi (inorganic phosphate) availability.	1.59436	4.91731e-31	UP
AT4G36640	NA	NA	1.59424	2.93661e-12	UP
AT2G15310	ARFB1A	A member of ARF GTPase family. A thaliana has 21 members of this family, known to be essential for vesicle coating and uncoating and functions in GTP-binding. Gene encoding ADP-ribosylation factor and similar to ADP-ribosylation factor (GI:861205) (Chlamydomonas reinhardtii), other ARFs and ARF-like proteins.	1.59285	2.99833e-08	UP
AT1G77760	GNR1	Encodes the cytosolic minor isoform of nitrate reductase (NR). Involved in the first step of nitrate assimilation, it contributes about 15% of the nitrate reductase activity in shoots. Similar to molybdopterin oxidoreductases at the N-terminus, and to FAD/NAD-binding cytochrome reductases at the C-terminus. Cofactors: FAD, heme iron (cytochrome B-557), and molybdenum-pterin.	1.59278	2.76414e-24	UP
AT3G06490	AtMYB108	putative transcription factor MYB108 (MYB108) mRNA,	1.59231	0.00576292	UP
AT4G36830	ELO4	NA	1.59225	0.00020862	UP
AT5G38280	PR5K	putative receptor serine/threonine kinase PR5K (PR5K) mRNA, PR5-like receptor kinase	1.5922	0.00741131	UP
AT4G33550	NA	NA	1.59211	8.27909e-08	UP
AT5G39610	ANAC092	Encodes a NAC-domain transcription factor. Positively regulates aging-induced cell death and senescence in leaves. This gene is upregulated in response to salt stress in wildtype as well as NTHK1 transgenic lines although in the latter case the induction was drastically reduced. It was also upregulated by ABA, ACC and NAA treatment, although in the latter two cases, the induction occurred relativ…	1.5919	2.5585e-08	UP
AT1G18300	atnudt4	NA	1.59169	8.28545e-06	UP
AT2G44890	NA	NA	1.59154	0.0206108	UP
AT2G30400	ATOFP2	NA	1.5907	0.045595	UP
AT3G15760	NA	NA	1.58812	3.29258e-12	UP
AT2G18690	NA	NA	1.58801	0.000153783	UP
AT1G61610	NA	NA	1.58767	6.79714e-06	UP
AT1G33260	NA	NA	1.58755	2.45233e-05	UP
AT1G28190	NA	NA	1.58745	2.19569e-14	UP
AT5G16200	NA	NA	1.58578	0.000262375	UP
AT4G18210	ATPUP10	Member of a family of proteins related to PUP1, a purine transporter. May be involved in the transport of purine and purine derivatives such as cytokinins, across the plasma membrane.	1.58565	1.76247e-18	UP
AT3G56200	NA	Encodes a putative amino acid transporter.	1.58427	4.87507e-12	UP
AT3G11402	NA	NA	1.5842	2.19562e-18	UP
AT3G14440	ATNCED3	Encodes 9-<i>cis</i>-epoxycarotenoid dioxygenase, a key enzyme in the biosynthesis of abscisic acid. Regulated in response to drought and salinity. Expressed in roots, flowers and seeds. Localized to the chloroplast stroma and thylakoid membrane.	1.58362	0.0127117	UP
AT3G54420	ATCHITIV	encodes an EP3 chitinase that is expressed during somatic embryogenesis in 'nursing' cells surrounding the embryos but not in embryos themselves. The gene is also expressed in mature pollen and growing pollen tubes until they enter the receptive synergid, but not in endosperm and integuments as in carrot. Post-embryonically, expression is found in hydathodes, stipules, root epidermis and emerging…	1.58194	4.8656e-08	UP
AT2G41220	GLU2	Encodes a gene whose sequence is similar to ferredoxin dependent glutamate synthase (Fd-GOGAT). Expression is most abundant in root.	1.58089	6.71261e-46	UP
AT5G66760	SDH1-1	One of two genes in Arabidopsis that encode a flavoprotein subunit of the mitochondrial succinate dehydrogenase complex.	1.58019	5.75231e-60	UP
AT1G05213	NA	NA	1.57976	0.00439822	UP
AT5G64990	AtRABH1a	NA	1.57895	0.000498642	UP
AT1G64065	NA	NA	1.57704	2.45351e-08	UP
AT1G78050	PGM	NA	1.57501	2.90089e-05	UP
AT1G09740	NA	NA	1.57479	6.33238e-38	UP
AT3G52400	ATSYP122	syntaxin protein, involved in the negative regulation of defense pathways such as programmed cell death, salicylic acid signalling pathway, jasmonic acid signalling pathway	1.57455	5.46052e-09	UP
AT1G28390	NA	NA	1.57431	7.37916e-09	UP
AT3G52430	ATPAD4	Encodes a lipase-like gene that is important for salicylic acid signaling and function in resistance (R) gene-mediated and basal plant disease resistance. PAD4 can interact directly with EDS1, another disease resistance signaling protein. Expressed at elevated level in response to green peach aphid (GPA) feeding, and modulates the GPA feeding-induced leaf senescence through a mechanism that doesn…	1.57374	4.41202e-18	UP
AT4G21580	NA	NA	1.57278	6.76662e-31	UP
AT1G33030	NA	NA	1.57088	7.52059e-07	UP
AT1G73540	atnudt21	NA	1.57034	4.15796e-07	UP
AT2G35658	NA	NA	1.57032	0.00126994	UP
AT4G04125	NA	NA	1.57028	0.000220327	UP
AT3G10910	NA	NA	1.56935	0.0404828	UP
AT1G29050	TBL38	Encodes a member of the TBL (TRICHOME BIREFRINGENCE-LIKE) gene family containing a plant-specific DUF231 (domain of unknown function) domain. TBL gene family has 46 members, two of which (TBR/AT5G06700 and TBL3/AT5G01360) have been shown to be involved in the synthesis and deposition of secondary wall cellulose, presumably by influencing the esterification state of pectic polymers. A nomenclature…	1.56899	4.82195e-12	UP
AT5G24230	NA	NA	1.56767	1.01377e-06	UP
AT1G67850	NA	NA	1.56669	1.31529e-22	UP
AT3G51860	ATCAX3	NA	1.56599	7.57478e-22	UP
AT5G67245	NA	NA	1.56369	0.000620154	UP
AT4G34180	CYCLASE1	NA	1.56317	6.34653e-31	UP
AT1G70300	KUP6	potassium transporter	1.56255	1.84366e-12	UP
AT5G52640	ATHS83	Encodes a cytosolic heat shock protein AtHSP90.1. AtHSP90.1 interacts with disease resistance signaling components SGT1b and RAR1 and is required for RPS2-mediated resistance.	1.56205	6.0684e-16	UP
AT1G75170	NA	NA	1.56192	4.32878e-15	UP
AT1G21090	NA	NA	1.56189	0.000202858	UP
AT4G21610	LOL2	Contains the same novel zinc finger motif with LSD1, a negative regulator of cell death and defense response. Due to differential splicing, it encodes two different proteins, one of which contains an additional, putative DNA binding motif. Northern analysis demonstrated that LOL2 transcripts containing the additional DNA binding motif are predominantly upregulated after treatment with both virule…	1.56138	2.47366e-12	UP
AT5G10520	RBK1	NA	1.56112	2.13171e-06	UP
AT3G06860	ATMFP2	Encodes a multifunctional protein. Involved in peroxisomal fatty acid beta oxidation. Loss-of-function mutant lacks hydroxyacyl-CoA dehydrogenase activity and have reduced levels of long-chain enoyl-CoA hydratase activity. The mutant has fewer but larger peroxisomes.	1.55699	1.44778e-35	UP
AT5G25450	NA	NA	1.55469	0.00208938	UP
AT4G18050	ABCB9	NA	1.55435	6.17129e-18	UP
AT4G05020	NDB2	NA	1.55428	7.76969e-12	UP
AT2G23810	TET8	Member of TETRASPANIN family	1.55342	2.50189e-12	UP
AT5G24210	NA	NA	1.55299	1.42919e-19	UP
AT5G03555	AtNCS1	NA	1.55182	1.38831e-22	UP
AT1G58190	AtRLP9	NA	1.55146	7.86948e-16	UP
AT1G56550	RGXT3	Encodes a rhamnogalacturonan II specific xylosyltransferase.	1.55127	3.41614e-22	UP
AT3G53810	LecRK-IV.2	NA	1.55098	4.50008e-16	UP
AT5G05600	JAO2	NA	1.55003	0.00440343	UP
AT5G47140	GATA27	Encodes a member of the GATA factor family of zinc finger transcription factors.	1.54937	1.63366e-29	UP
AT1G72890	NA	NA	1.54717	3.67336e-32	UP
AT1G67856	NA	NA	1.54599	4.48162e-05	UP
AT1G59640	BPE	A basic helix-loop-helix encoding gene (BIGPETAL, BPE) involved in the control of petal size. BPE is expressed via two mRNAs derived from an alternative splicing event. The BPEub (AT1G59640.1)transcript is expressed ubiquitously, whereas the BPEp (AT1G59640.2) transcript is preferentially expressed in petals. Plants that lack the petal-expressed variant BPEp have larger petals as a result of incr…	1.54493	1.23723e-06	UP
AT4G37900	AtGRDP2	NA	1.54359	3.36993e-15	UP
AT3G18950	NA	NA	1.54353	4.13399e-17	UP
AT1G77120	ADH	Catalyzes the reduction of acetaldehyde using NADH as reductant. Requires zinc for activity. Dimer. Anaerobic response polypeptide (ANP). Fermentation. The protein undergoes thiolation following treatment with the oxidant tert-butylhydroperoxide.	1.54304	1.82022e-11	UP
AT4G27830	AtBGLU10	NA	1.54262	1.53219e-15	UP
AT2G25297	NA	NA	1.54194	2.35503e-08	UP
AT5G13420	TRA2	NA	1.54035	2.23691e-29	UP
AT2G45360	NA	NA	1.54024	0.00381627	UP
AT3G59068	NA	NA	1.53648	0.00458255	UP
AT4G35630	PSAT1	Encodes a phosphoserine aminotransferase which is involved in serine biosynthesis in the chloroplast which operates via the phosphorylated pathway.	1.53497	4.13577e-15	UP
AT3G52460	NA	NA	1.53348	0.00240519	UP
AT2G31020	ORP1A	NA	1.5333	6.11534e-10	UP
AT5G56960	NA	NA	1.53221	0.000105174	UP
AT5G22540	NA	NA	1.53204	4.22686e-09	UP
AT3G03610	NA	NA	1.53153	3.83576e-35	UP
AT1G07900	NA	NA	1.53148	3.0298e-10	UP
AT4G23010	ATUTR2	NA	1.53143	3.6026e-23	UP
AT1G79270	ECT8	NA	1.53091	1.07534e-14	UP
AT5G53370	ATPMEPCRF	NA	1.53065	1.49508e-47	UP
AT5G51070	CLPD	ATP-dependent Clp protease regulatory subunit	1.53036	3.86014e-20	UP
AT2G28200	NA	NA	1.53003	1.35721e-06	UP
AT4G01895	NA	NA	1.52688	0.000787563	UP
AT3G59700	ATHLECRK	member of Receptor kinase-like protein family	1.52583	2.73333e-12	UP
AT5G26170	ATWRKY50	member of WRKY Transcription Factor; Group II-c	1.52562	9.34016e-10	UP
AT3G19970	NA	NA	1.52555	8.43327e-07	UP
AT4G28290	NA	NA	1.52398	2.05398e-09	UP
AT3G14050	AT-RSH2	NA	1.52375	1.5459e-09	UP
AT2G37430	ZAT11	NA	1.5236	0.00744536	UP
AT5G51640	TBL17	Encodes leaf-senescence-related protein. A member of the TBL (TRICHOME BIREFRINGENCE-LIKE) gene family containing a plant-specific DUF231 (domain of unknown function) domain. TBL gene family has 46 members, two of which (TBR/AT5G06700 and TBL3/AT5G01360) have been shown to be involved in the synthesis and deposition of secondary wall cellulose, presumably by influencing the esterification state o…	1.52332	2.42134e-17	UP
AT1G26420	AtBBE7	NA	1.52276	2.93284e-10	UP
AT5G48485	DIR1	encodes a putative apoplastic lipid transfer protein that is involved in systemic acquired resistance. Mutants in this gene exhibit wild-type local resistance to avirulent and virulent Pseudomonas syringae, but pathogenesis-related gene expression is abolished in uninoculated distant leaves and fail to develop SAR to virulent Pseudomonas or Peronospora parasitica.	1.5209	2.57574e-14	UP
AT3G05165	NA	NA	1.51983	2.53589e-16	UP
AT4G17500	AtERF#100	Encodes a member of the ERF (ethylene response factor) subfamily B-3 of ERF/AP2 transcription factor family (ATERF-1). The protein contains one AP2 domain. There are 18 members in this subfamily including ATERF-1, ATERF-2, AND ATERF-5.	1.5198	9.50139e-14	UP
AT3G22550	NA	NA	1.51883	5.10663e-14	UP
AT3G19580	AZF2	Encodes zinc finger protein. mRNA levels are upregulated in response to ABA, high salt, and mild dessication. The protein is localized to the nucleus and acts as a transcriptional repressor.	1.51849	1.95328e-07	UP
AT1G22110	NA	NA	1.51736	0.0017941	UP
AT5G06860	ATPGIP1	Encodes a polygalacturonase inhibiting protein involved in defense response. PGIPs inhibit the function of cell wall pectin degrading enzymes such as those produced by fungal pathogens. PGIP1 is induced by fungal infection.	1.51652	2.80993e-13	UP
AT3G61490	NA	NA	1.5151	1.25542e-09	UP
AT4G26950	NA	NA	1.51439	0.00547047	UP
AT5G54110	ATMAMI	Encodes a highly polar protein with more than 60% hydrophilic amino acid residues that is associated with the plasma membrane. It has limited secondary structure similarity to VAP-33 from Aplysia, which may be involved in membrane trafficking.	1.51434	7.02403e-22	UP
AT3G12910	NA	NA	1.51423	0.000592239	UP
AT1G02670	NA	NA	1.51391	0.00380091	UP
AT3G18260	RTNLB9	NA	1.51386	3.26763e-06	UP
AT5G49520	ATWRKY48	Encodes WRKY48, a member of the WRKY Transcription Factor. WRKY48 is a stress- and pathogen-induced transcriptional activator that represses plant basal defense.	1.51026	2.83067e-08	UP
AT2G39110	NA	NA	1.51022	0.00747818	UP
AT3G28600	NA	NA	1.50981	0.025676	UP
AT4G01250	AtWRKY22	member of WRKY Transcription Factor; Group II-e	1.50976	4.10847e-13	UP
AT5G22460	NA	NA	1.50909	1.63067e-06	UP
AT4G29950	NA	NA	1.50662	5.69338e-20	UP
AT3G25610	ALA10	NA	1.50583	1.07352e-12	UP
AT5G11650	MAGL13	NA	1.5056	5.4171e-14	UP
AT5G63680	NA	NA	1.5048	1.64095e-18	UP
AT5G51630	NA	NA	1.50284	3.64626e-14	UP
AT1G47560	SEC3B	Encodes a member of the exocyst complex gene family. The exocyst is a protein complex involved in tethering vesicles to the plasma membrane during regulated or polarized secretion.	1.50223	1.18244e-09	UP
AT2G38640	NA	NA	1.50127	1.10058e-16	UP
AT4G02520	ATGSTF2	Encodes glutathione transferase belonging to the phi class of GSTs. Naming convention according to Wagner et al. (2002). The expression of this gene is upregulated by herbicide safeners such as benoxacor and fenclorim.	1.49946	7.99734e-12	UP
AT2G24195	NA	NA	1.49892	0.0263524	UP
AT3G02150	A-PTF-1	a chloroplast trans-acting factor of the psbD light-responsive promoter.TCP gene involved in heterochronic control of leaf differentiation.	1.4986	1.73242e-13	UP
AT2G04400	IGPS	NA	1.49844	1.32056e-15	UP
AT5G65210	TGA1	Encodes TGA1, a redox-controlled regulator of systemic acquired resistance. TGA1 targets the activation sequence-1 (as-1) element of the promoter region of defense proteins. TGA1 are S-nitrosylated.	1.49632	1.69439e-22	UP
AT1G15790	NA	NA	1.4961	1.54728e-16	UP
AT1G47890	AtRLP7	NA	1.4959	5.69702e-07	UP
AT5G24240	AtPI4Kgamma3	NA	1.49521	3.48958e-06	UP
AT1G24140	AT3-MMP	NA	1.49398	5.28732e-07	UP
AT2G06255	EFL3	NA	1.49347	8.50054e-07	UP
AT2G24180	CYP71B6	cytochrome P450 monooxygenase	1.49339	4.53899e-27	UP
AT4G32870	NA	NA	1.49089	1.15765e-11	UP
AT1G23710	NA	NA	1.4907	4.74651e-08	UP
AT3G44450	BIC2	NA	1.48983	1.29195e-24	UP
AT5G45000	NA	NA	1.48905	2.23331e-14	UP
AT1G76390	AtPUB43	NA	1.48866	9.14392e-15	UP
AT1G32170	XTH30	xyloglucan endotransglycosylase-related protein (XTR4)	1.48854	5.47335e-17	UP
AT5G09420	AtmtOM64	NA	1.48843	1.07413e-10	UP
AT1G69260	AFP1	NA	1.48754	0.00248938	UP
AT4G35090	CAT2	Encodes a peroxisomal catalase, highly expressed in bolts and leaves. mRNA expression patterns show circadian regulation with mRNA levels being high in the subjective early morning. Loss of function mutations have increased H2O2 levels and increased H2O2 sensitivity. Mutants accumulate more toxic ions yet show decreased sensitivity to Li+. This decreased sensitivity is most likely due to an insen…	1.48711	1.10934e-94	UP
AT3G26500	PIRL2	Encodes PIRL2, a member of the Plant Intracellular Ras-group-related LRRs (Leucine rich repeat proteins). PIRLs are a distinct, plant-specific class of intracellular LRRs that likely mediate protein interactions, possibly in the context of signal transduction.	1.48659	3.60141e-11	UP
AT5G20230	ATBCB	Al-stress-induced gene	1.48316	2.10477e-07	UP
AT1G68690	AtPERK9	NA	1.47789	5.72116e-10	UP
AT4G19045	MOB1B	NA	1.47786	2.35065e-10	UP
AT1G07390	AtRLP1	NA	1.47774	8.11502e-08	UP
AT5G44567	NA	NA	1.47663	3.79766e-08	UP
AT1G21550	NA	NA	1.4759	2.00699e-06	UP
AT5G63850	AAP4	Amino acid transporter whose expression is downregulated by dehydration.	1.47478	9.14392e-09	UP
AT5G63970	RGLG3	NA	1.4736	1.21509e-11	UP
AT3G08870	LecRK-VI.1	NA	1.47328	6.51838e-20	UP
AT4G00955	NA	NA	1.47277	2.96721e-24	UP
AT1G75100	AUXILIN-LIKE6	Contains a J-domain at the C-terminus which is similar to the J-domain of auxilin, a clathrin-uncoating factor in cow, yeast and worm. Arabidopsis contains 6 other proteins similar to auxilin. Expressed in leaves and stems, but not in roots. Localized in the cytoplasm. Required for the chloroplast accumulation response, but not for the avoidance response. No molecular function known.	1.47201	2.84215e-30	UP
AT2G04040	ATDTX1	AtDTX1 (At2g04040) has been identified as a detoxifying efflux carrier for plant-derived antibiotics and other toxic compounds, including CD2+.	1.46989	0.00010161	UP
AT2G17760	NA	NA	1.46733	2.55023e-33	UP
AT1G21140	AtVTL1	NA	1.46723	0.000582982	UP
AT3G05500	LDAP3	NA	1.46707	4.12085e-11	UP
AT5G59490	NA	NA	1.46662	0.0379947	UP
AT3G52540	ATOFP18	NA	1.46638	0.000209179	UP
AT3G59880	NA	NA	1.46609	7.53542e-08	UP
AT1G19850	ARF5	Encodes a transcription factor (IAA24) mediating embryo axis formation and vascular development. Similar to AUXIN RESPONSIVE FACTOR 1 (ARF1) shown to bind to auxin responsive elements (AREs), and to the maize transcriptional activator VIVIPAROUS 1( VP1). In situ hybridization shows expression in provascular tissue of embryos, the emerging shoot primordia, then is restricted to provascular tissue,…	1.46581	3.7097e-19	UP
AT5G04340	AtZAT6	putative c2h2 zinc finger transcription factor mRNA,	1.46575	1.08414e-06	UP
AT3G24090	GFAT	NA	1.46539	5.32164e-08	UP
AT5G06190	NA	NA	1.46406	0.00432698	UP
AT2G16530	PPRD2	NA	1.46192	1.79378e-21	UP
AT1G10140	NA	NA	1.46182	1.68023e-11	UP
AT5G47120	ATBI-1	Encodes BI-1, a homolog of mammalian Bax inhibitor 1. Functions as an attenuator of biotic and abiotic types of cell death. Bax-induced cell death can be downregulated by ectopically expressing AtBI in planta.	1.46177	8.51568e-18	UP
AT2G04515	NA	NA	1.46155	0.000317835	UP
AT1G70500	NA	NA	1.45959	0.000249534	UP
AT5G67160	EPS1	Encodes a member of the BAHD acyltransferase superfamily. Mutants have enhanced susceptibility to virulent and avirulent pathogens and are defective in pathogen induced SA biosynthesis. EPS1 may act upstream of SA biosynthesis as application of SA can rescue the mutant phenotype.	1.4595	1.74134e-07	UP
AT4G12350	AtMYB42	Encodes a putative transcription factor (MYB42).	1.45924	0.0404216	UP
AT5G55560	NA	NA	1.45853	3.58824e-10	UP
AT1G61420	NA	NA	1.45627	9.08283e-12	UP
AT3G51670	PATL6	NA	1.45623	1.31497e-23	UP
AT5G56350	NA	NA	1.45462	3.71017e-34	UP
AT5G46500	NA	NA	1.45311	5.30453e-07	UP
AT2G36080	ABS2	Encodes a plant-specific B3 DNA-binding domain transcription factor. Has transcription repressor activity.	1.45303	1.079e-13	UP
AT2G17720	P4H5	NA	1.45297	1.45619e-16	UP
AT5G45380	ATDUR3	NA	1.45084	4.37506e-16	UP
AT4G23885	NA	NA	1.44951	1.07859e-11	UP
AT5G48657	NA	NA	1.44941	6.67467e-09	UP
AT4G21980	APG8A	Encodes APG8, a component of autophagy conjugation pathway. Delivered to the lumens of vacuole under nitrogen-starvation condition. Highest expression in flowers. mRNA abundance increased during dark-induced carbon starvation. Predominantly cytoplasmic with or without N starvation. Upon concanamycin A the protein accumulates in the central vacuole as punctuate structures that resemble autophagic …	1.44908	2.50717e-27	UP
AT1G70920	ATHB18	NA	1.44872	0.0132907	UP
AT5G57910	NA	NA	1.44856	2.58121e-11	UP
AT4G25900	NA	NA	1.44813	7.98352e-21	UP
AT3G28340	GATL10	Encodes a protein with putative galacturonosyltransferase activity.	1.44763	7.66901e-06	UP
AT2G02310	AtPP2-B6	NA	1.44546	0.0177052	UP
AT4G39190	NA	NA	1.44445	8.18321e-12	UP
AT2G26310	AtFAP2	NA	1.44435	0.00145253	UP
AT3G25882	NIMIN-2	encodes a kinase that physically interacts with NPR1/NIM1	1.44413	1.9716e-09	UP
AT1G56060	AthCYSTM3	NA	1.44371	3.76701e-06	UP
AT1G73650	NA	NA	1.44355	2.52567e-36	UP
AT3G51350	NA	NA	1.44225	0.000322638	UP
AT3G24929	NA	NA	1.44194	1.25921e-06	UP
AT2G29990	NDA2	NA	1.44085	8.73458e-14	UP
AT3G44310	ATNIT1	Mutants are resistant to indole-3-acetonitrile (IAN). NIT1 catalyzes the terminal activation step in indole-acetic acid biosynthesis. Predominantly expressed isoform of nitrilase isoenzyme family. Aggregation of NIT1 in cells directly abutting wound sites is one of the earliest events associated with wound and herbicide-induced cell death. The protein undergoes thiolation following treatment with…	1.44049	4.24262e-22	UP
AT4G02380	AtLEA5	Encodes AtLEA5 (late embryogenesis abundant like protein). Also known as SENESCENCE-ASSOCIATED GENE 21 (SAG21). Has a role on oxidative stress tolerance. mRNA levels are elevated in response to various stresses.	1.44047	2.85825e-10	UP
AT1G75750	GASA1	GA-responsive GAST1 protein homolog regulated by BR and GA antagonistically. Possibly involved in cell elongation based on expression data	1.44013	3.5438e-20	UP
AT3G48310	CYP71A22	putative cytochrome P450	1.43993	1.88861e-17	UP
AT4G13890	EDA36	NA	1.43972	1.46468e-06	UP
AT4G14390	NA	NA	1.43941	7.38152e-06	UP
AT4G20930	HDH1	NA	1.43856	1.82559e-11	UP
AT1G30135	JAZ8	NA	1.43841	0.00342658	UP
AT5G47880	AteRF1-1	Encodes a eukaryotic release factor 1 homolog. Cosuppression of the gene's expression results affects cell elongation of the inflorescence stem, specifically the internodes, and radial cell division. Expression of the protein is primarily observed in the vascular system and in actively growing and elongating zones.	1.43798	1.76199e-55	UP
AT1G64170	ATCHX16	member of Putative Na+/H+ antiporter family	1.43619	3.9001e-26	UP
AT4G23150	CRK7	Encodes a cysteine-rich receptor-like protein kinase.	1.4357	2.12027e-12	UP
AT1G73810	NA	NA	1.43509	6.14414e-08	UP
AT1G67650	NA	NA	1.43468	3.31209e-07	UP
AT4G25000	AMY1	Predicted to be secreted protein based on signalP prediction. Involved in starch mobilization. Mutants are defective in alpha-amylase activity. (Note: AMY1 has been found in the literature to be referred to as AMY3, which is not to be confused with AMY3/At1g69830).	1.43421	2.75127e-09	UP
AT4G15430	NA	NA	1.43378	0.00573697	UP
AT1G65240	A39	NA	1.43352	4.69832e-06	UP
AT3G25870	NA	NA	1.43312	1.29981e-16	UP
AT4G12720	AtNUDT7	Encodes a protein with ADP-ribose hydrolase activity. Negatively regulates EDS1-conditioned plant defense and programmed cell death.	1.43294	1.4666e-10	UP
AT3G27270	NA	NA	1.43274	6.96773e-07	UP
AT4G29230	anac075	NA	1.43064	0.000144919	UP
AT5G12300	NA	NA	1.43035	4.88259e-11	UP
AT3G12830	SAUR72	NA	1.43002	1.52896e-07	UP
AT2G32960	AtPFA-DSP2	NA	1.42976	7.21613e-05	UP
AT4G21903	NA	NA	1.42932	1.59842e-06	UP
AT2G47800	ABCC4	Encodes a plasma membrane localized ATPase transporter involved in multidrug transport. The expression of this gene is upregulated by herbicide safeners such as benoxacor, fluxofenim and fenclorim.	1.42896	4.26584e-16	UP
AT3G26440	NA	NA	1.42852	1.50824e-17	UP
AT2G44500	NA	NA	1.42845	5.23351e-19	UP
AT5G58620	TZF9	NA	1.42784	1.80517e-14	UP
AT5G43910	NA	NA	1.4271	2.86805e-14	UP
AT5G40760	G6PD6	Encodes a cytosolic glucose-6-phosphate dehydrogenase that is insensitive to reduction by DTT and whose mRNA is expressed ubiquitously.	1.42522	3.0842e-11	UP
AT5G24760	NA	NA	1.42469	1.07904e-10	UP
AT1G77500	NA	NA	1.42339	8.36399e-18	UP
AT2G12190	NA	NA	1.42187	9.00427e-34	UP
AT4G30450	NA	NA	1.42129	1.63001e-07	UP
AT1G66090	NA	NA	1.41959	0.00417699	UP
AT4G19950	NA	NA	1.41923	1.88095e-06	UP
AT5G62020	AT-HSFB2A	member of Heat Stress Transcription Factor (Hsf) family	1.41808	5.1949e-13	UP
AT3G07700	abc1k7	NA	1.41804	3.19874e-24	UP
AT5G19240	NA	NA	1.41749	1.63539e-09	UP
AT3G15518	NA	NA	1.41717	8.31865e-07	UP
AT5G61560	NA	NA	1.41657	2.1133e-16	UP
AT5G39720	NA	NA	1.41599	0.0037651	UP
AT3G60690	SAUR59	NA	1.41596	5.6195e-11	UP
AT2G31865	atPARG2	NA	1.41511	1.33037e-08	UP
AT5G64110	NA	NA	1.41483	8.9744e-05	UP
AT1G65820	NA	NA	1.41382	1.03209e-19	UP
AT2G30040	MAPKKK14	member of MEKK subfamily	1.41354	1.66421e-06	UP
AT5G26860	LON1	Encodes a member of the Lon protease-like proteins (Lon1/At5g26860, Lon2/At5g47040, Lon3/At3g05780, Lon4/At3g05790). Lon is a multifunctional ATP-dependent protease which exists in bacteria, archaea and within organelles in eukaryotic cells. Lon proteases are responsible for the degradation of abnormal, damaged and unstable proteins.	1.41111	2.11249e-18	UP
AT3G54640	TRP3	Catalyzes the conversion of indole-3-glycerolphosphate to indole, the penultimate reaction in the biosynthesis of tryptophan. Functions as a heterocomplex with tryptophan synthase beta subunit (TSA2).	1.41105	5.73483e-12	UP
AT1G14870	AtPCR2	NA	1.41072	2.89106e-08	UP
AT3G10450	SCPL7	NA	1.4095	3.78114e-08	UP
AT3G52190	AtPHF1	Encodes a plant specific protein structurally related to the SEC12 proteins of the early secretory pathway. Mutation of PHF1 impairs Pi transport. Expression was detected in all tissues, and was induced by Pi starvation. Localized in endoplasmic reticulum (ER), and mutation of PHF1 resulted in ER retention and reduced accumulation of the plasma membrane PHT1;1 transporter.	1.40885	4.24433e-22	UP
AT3G53232	DVL20	NA	1.40867	0.00120156	UP
AT1G68765	IDA	Encodes a small protein of 77 amino acids. Loss of function mutations are defective in the process of ethylene independent floral organ abscission. Although the mutants have a normal appearing abscission zone, the floral organs do not abscisce. The peptide appears to be secreted and may function as a ligand. Arabidopsis 35S:IDA lines constitutively overexpressing IDA exhibit earlier abscission of…	1.40418	0.00253547	UP
AT4G27657	NA	NA	1.40406	0.00322308	UP
AT5G17380	NA	NA	1.40324	3.40008e-21	UP
AT1G79610	ATNHX6	NA	1.40284	1.62844e-27	UP
AT1G33560	ADR1	Encodes a NBS-LRR disease resistance protein that possesses N-terminal kinase subdomains. Activation tagged mutant of ADR1 showed elevated levels of SA and reactive oxygen species in addition to number of defense gene transcripts. Exhibits resistance to number of microbial pathogens.	1.40025	1.40363e-17	UP
AT4G18253	NA	NA	1.39843	4.99543e-12	UP
AT1G78310	VQ9	NA	1.3983	1.00274e-10	UP
AT3G18280	AtTED4	NA	1.39797	1.55235e-13	UP
AT2G44290	NA	NA	1.39715	7.45314e-13	UP
AT1G24145	NA	NA	1.39653	1.21384e-09	UP
AT5G25120	CYP71B11	putative cytochrome P450	1.39512	2.21453e-42	UP
AT3G19030	NA	NA	1.39506	3.37276e-12	UP
AT2G46400	ATWRKY46	member of WRKY Transcription Factor; Group III	1.39438	5.58878e-07	UP
AT4G01010	ATCNGC13	member of Cyclic nucleotide gated channel family	1.39397	5.85379e-10	UP
AT1G34180	anac016	NA	1.39283	8.38459e-13	UP
AT1G16510	SAUR41	NA	1.39276	1.30023e-07	UP
AT3G55890	NA	NA	1.39174	0.000486653	UP
AT1G27730	STZ	Related to Cys2/His2-type zinc-finger proteins found in higher plants. Compensated for a subset of calcineurin deficiency in yeast. Salt tolerance produced by ZAT10 appeared to be partially dependent on ENA1/PMR2, a P-type ATPase required for Li+ and Na+ efflux in yeast. The protein is localized to the nucleus, acts as a transcriptional repressor and is responsive to chitin oligomers. Also involv…	1.38909	1.73779e-06	UP
AT1G32450	AtNPF7.3	Transmembrane nitrate transporter. Involved in xylem transport of nitrate from root to shoot. Induced in response to nitrate. Not involved in nitrate uptake. expressed in root pericycle cells.	1.38907	9.02185e-16	UP
AT3G23170	PRP	NA	1.38771	5.33445e-12	UP
AT5G41860	NA	NA	1.3872	0.00208086	UP
AT3G44880	ACD1	Encodes a pheide a oxygenase (PAO). Accelerated cell death (acd1) mutants show rapid, spreading necrotic responses to both virulent and avirulent Pseudomonas syringae pv. maculicola or pv. tomato pathogens and to ethylene.	1.38664	1.48933e-50	UP
AT1G51920	NA	NA	1.38606	1.94055e-05	UP
AT2G18660	AtPNP-A	Encodes PNP-A (Plant Natriuretic Peptide A). PNPs are a class of systemically mobile molecules distantly related to expansins; their biological role has remained elusive. PNP-A contains a signal peptide domain and is secreted into the extracellular space. Co-expression analyses using microarray data suggest that PNP-A may function as a component of plant defence response and SAR in particular, an…	1.38556	2.66452e-14	UP
AT1G51620	NA	NA	1.3853	3.94001e-09	UP
AT2G18000	TAF14	NA	1.38505	6.19755e-06	UP
AT1G13080	CYP71B2	cytochrome P450 monooxygenase	1.38495	9.2133e-27	UP
AT1G16900	EBS3	curculin-like (mannose-binding) lectin family protein, very low similarity to Ser Thr protein kinase GI:2598067 from (Zea mays); contains Pfam lectin (probable mannose binding) domain PF01453 but not the protein kinase domain of the Z. mays protein	1.38477	2.87208e-20	UP
AT5G37490	NA	NA	1.38473	0.0416417	UP
AT1G50420	SCL-3	Encodes a scarecrow-like protein (SCL3) Putative transcription factors interacting with the gene product of VHA-B1 (vacuolar ATPase subunit B1; as shown through yeast two-hybrid assay).	1.38449	9.23964e-13	UP
AT2G37460	UMAMIT12	NA	1.3843	5.03393e-16	UP
AT1G60420	AtNRX1	Reduce transmission through pollen.	1.38398	1.96577e-26	UP
AT1G18940	NA	NA	1.3819	0.000537644	UP
AT1G09210	AtCRT1b	Encodes one of three Arabidopsis calreticulins.	1.38186	1.72233e-14	UP
AT1G30370	DLAH	NA	1.37936	0.00217566	UP
AT5G53550	ATYSL3	NA	1.37763	6.36249e-20	UP
AT3G28890	AtRLP43	NA	1.37691	2.61365e-13	UP
AT2G41835	NA	NA	1.37683	3.37567e-09	UP
AT2G30020	AP2C1	Encodes AP2C1. Belongs to the clade B of the PP2C-superfamily. Acts as a MAPK phosphatase that negatively regulates MPK4 and MPK6.	1.37525	1.44458e-05	UP
AT1G48320	DHNAT1	NA	1.37517	2.91114e-13	UP
AT2G35060	KUP11	potassium transporter	1.37493	1.70391e-42	UP
AT5G42020	BIP	Luminal binding protein (BiP2) involved in polar nuclei fusion during proliferation of endosperm nuclei.	1.37409	7.56729e-10	UP
AT3G49320	NA	NA	1.37287	1.26195e-06	UP
AT1G65845	NA	NA	1.37264	5.15989e-11	UP
AT5G13190	AtGILP	NA	1.37179	3.04331e-10	UP
AT1G21000	NA	NA	1.37172	1.12314e-10	UP
AT5G40240	UMAMIT40	NA	1.37154	2.02814e-16	UP
AT3G27350	NA	NA	1.3687	7.62223e-12	UP
AT1G71890	ATSUC5	Encodes a sucrose transporter that is expressed in the endosperm. Mutants have delayed accumulation of fatty acids and embryo maturation.	1.36846	0.00620499	UP
AT4G16760	ACX1	Encodes a medium to long-chain acyl-CoA oxidase. Catalyzes the first step of fatty acid beta-oxidation. Involved in jasmonate biosynthesis. Gene expression is induced by wounding, drought stress, abscisic acid, and jasmonate.	1.36806	1.4555e-09	UP
AT2G08780	NA	NA	1.36793	0.00596084	UP
AT3G17611	ATRBL10	NA	1.36738	2.56299e-08	UP
AT3G13330	PA200	Encodes a protein that interacts with the 26S proteasome. Mutants are phenotypically indistinguishable from wild type plants under a variety of growth conditions. Protein levels increase upon exposure of seedlings to MG132, a specific, potent, reversible, and cell-permeable proteasome inhibitor.	1.36396	1.38194e-24	UP
AT3G23530	NA	NA	1.36153	2.84178e-30	UP
AT5G25910	AtRLP52	putative disease resistance protein induced by chitin oligomers.	1.36142	1.47418e-06	UP
AT5G53110	NA	NA	1.36122	2.4112e-07	UP
AT3G57630	ExAD	NA	1.3612	6.13267e-14	UP
AT5G42050	NRP	NA	1.36039	1.93163e-11	UP
AT4G18010	5PTASE2	Encodes an inositol polyphosphate 5-phosphatase that appears to have Type I activity. It can dephosphorylate IP3(inositol(1,4,5)P3) and IP4 (inositol(1,3,4,5)P4), but it does not appear to be active against phosphatidylinositol 4,5 bisphosphate. Overexpression of this gene renders plants insensitive to ABA in germination and growth assays.	1.35931	1.21709e-09	UP
AT3G18830	ATPLT5	This gene encodes a plasma membrane-localized polyol/cyclitol/monosaccharide-H+-symporter. The symporter is able to catalyze the energy-dependent membrane passage of a wide range of linear polyols (three to six carbon backbone), of cyclic polyols (<i>myo</i>-inositol), and of numerous monosaccharides, including pyranose ring-forming and furanose ring-forming hexoses and pentoses. This gene belong…	1.3584	4.17872e-20	UP
AT1G50180	NA	NA	1.35812	5.98192e-11	UP
AT4G04620	ATG8B	NA	1.35627	3.22613e-12	UP
AT5G62680	AtNPF2.11	NA	1.35601	1.30427e-30	UP
AT3G02520	GF14	Encodes GF14 &#957;, a 14-3-3 protein isoform (14-3-3&#957;).	1.35552	4.40852e-21	UP
AT1G09100	RPT5B	Encodes RPT5b (Regulatory Particle 5b), one of the six AAA-ATPases of the proteasome regulatory particle. Essential for gametophyte development. In Arabidopsis, the RPT5 subunit is encoded by two highly homologous genes, RPT5a and RPT5b. RPT5a and RPT5b show accession-dependent functional redundancy. In Wassilewskija (Ws) accession: mutant alleles of RPT5a displayed 50% pollen lethality, indicati…	1.3554	6.93006e-29	UP
AT1G20120	NA	NA	1.35505	0.0332522	UP
AT5G41400	NA	NA	1.35504	1.32768e-14	UP
AT1G15670	KFB01	NA	1.35461	1.3656e-08	UP
AT3G27410	NA	NA	1.35279	0.00247528	UP
AT5G01600	ATFER1	Encodes a ferretin protein that is targeted to the chloroplast. Member of a Ferritin gene family. Gene expression is induced in response to iron overload and by nitric oxide. Expression of the gene is downregulated in the presence of paraquat, an inducer of photoxidative stress.	1.34952	5.3487e-17	UP
AT1G80300	ATNTT1	NA	1.3466	9.69902e-29	UP
AT5G26700	NA	NA	1.34635	0.00799839	UP
AT1G31290	AGO3	NA	1.34623	0.00084688	UP
AT2G31390	FRK1	NA	1.34483	2.08132e-24	UP
AT3G13090	ABCC6	member of MRP subfamily	1.34471	5.76926e-06	UP
AT1G80830	ATNRAMP1	Thought to be involved in iron homeostasis. Induced in leaves in response to iron deficiency. Transgenic plants accumulate toxic levels of iron. Gene complements yeast iron uptake mutants.	1.34449	1.06421e-10	UP
AT4G25880	APUM6	Encodes a member of the Arabidopsis Pumilio (APUM) proteins containing PUF domain (eight repeats of approximately 36 amino acids each). PUF proteins regulate both mRNA stability and translation through sequence-specific binding to the 3' UTR of target mRNA transcripts.	1.3443	1.39938e-28	UP
AT5G17640	ASG1	NA	1.34393	2.42765e-24	UP
AT3G24840	NA	NA	1.34374	6.3866e-07	UP
AT1G79530	GAPCP-1	Encodes one of the chloroplast/plastid localized GAPDH isoforms (GAPCp1/At1g79530 and GAPCp2/At1g16300). gapcp double mutants display a drastic phenotype of arrested root development, dwarfism and sterility. GAPCps are important for the synthesis of serine in roots.	1.34293	2.07881e-17	UP
AT3G02875	ILR1	Hydrolyzes amino acid conjugates of the plant growth regulator indole-3-acetic acid (IAA), including IAA-Leu and IAA-Phe. Uses Mg and Co ions as cofactors.	1.34284	2.8798e-09	UP
AT4G21930	NA	NA	1.34143	3.03002e-06	UP
AT3G52748	NA	NA	1.34134	0.00039094	UP
AT2G31200	ADF6	Encodes actin depolymerizing factor 6 (ADF6).	1.34118	4.92913e-21	UP
AT1G69610	NA	NA	1.34097	2.67637e-07	UP
AT3G60540	NA	NA	1.34043	2.97286e-11	UP
AT2G02810	ATUTR1	Encodes a multitransmembrane hydrophobic protein that functions as transporter of UDP-galactose and UDP-glucose into the Golgi. Localized in the ER. Involved in the unfolded protein response, a mechanism that controls proper protein folding in the ER.	1.34006	6.82217e-08	UP
AT5G27420	ATL31	Encodes CNI1 (Carbon/Nitrogen Insensitive1) (also named as ATL31), a RING type ubiquitin ligase that functions in the Carbon/Nitrogen response for growth phase transition in Arabidopsis seedlings.	1.33968	3.92534e-07	UP
AT4G37310	CYP81H1	member of CYP81H	1.33953	1.25685e-41	UP
AT5G19230	NA	NA	1.33866	1.83561e-05	UP
AT4G16670	FL7	NA	1.33824	1.50573e-19	UP
AT3G23560	ALF5	Member of the multidrug and toxic compound extrusion (MATE) family, protects roots from inhibitory compounds.	1.3369	1.64815e-12	UP
AT1G30900	BP80-3;3	NA	1.33434	2.07888e-12	UP
AT1G13360	NA	NA	1.33371	3.32022e-20	UP
AT4G27410	ANAC072	Encodes a NAC transcription factor induced in response to dessication. It is localized to the nucleus and acts as a transcriptional activator in ABA-mediated dehydration response.	1.33196	0.0141074	UP
AT2G39210	NA	NA	1.33086	3.07882e-11	UP
AT5G01815	NA	NA	1.33034	9.88292e-06	UP
AT1G21750	ATPDI5	Encodes a protein disulfide isomerase-like (PDIL) protein, a member of a multigene family within the thioredoxin (TRX) superfamily; isoform contains non-consensus GA donor splice site at intron 9. Transcript levels for this gene are up-regulated in response to three different chemical inducers of ER stress (dithiothreitol, beta-mercaptoethanol, and tunicamycin). Neither AtIRE1-2 nor AtbZIP60 appe…	1.33013	2.74303e-14	UP
AT4G17215	NA	NA	1.32951	0.00232942	UP
AT1G12290	NA	NA	1.32902	8.76832e-10	UP
AT3G10500	AIF	NA	1.32825	6.33655e-11	UP
AT1G10340	NA	NA	1.3271	1.25428e-10	UP
AT5G64930	CPR5	Regulator of expression of pathogenesis-related (PR) genes. Participates in signal transduction pathways involved in plant defense (systemic acquired resistance -SAR).	1.32697	1.00478e-18	UP
AT4G28390	AAC3	Encodes a mitochondrial ADP/ATP carrier protein. Shown in heterologous systems to be located in the plasma membrane. Has comparable affinity for ADP and ATP (in E.coli).	1.32293	5.68795e-11	UP
AT5G24380	ATYSL2	closest Arabidopsis homolog of Zea maize metal-phytosiderophore/metal-nicotianamine transporter ZmYS1	1.32293	4.46344e-09	UP
AT3G21780	UGT71B6	Encodes a protein with UDP-glucosyl transferase activity that was shown to preferentially glucosylates abscisic acid (ABA), and not its catabolites. Moreover, UGT71B6 was shown to have a strict preference for the naturally-occurring ABA enantiomer, (+)-ABA, and not its 'unnatural' relative, (-)-ABA. This is in contrast to the other identified UGT genes catalyzing the glucosylation of ABA which we…	1.32202	2.87029e-07	UP
AT3G21781	NA	NA	1.32202	2.87029e-07	UP
AT3G48390	MRF4	NA	1.32121	4.91949e-05	UP
AT5G12880	NA	NA	1.32101	0.038932	UP
AT2G44240	NA	NA	1.32049	0.00802122	UP
AT1G26380	AtBBE3	NA	1.31918	3.40324e-08	UP
AT4G14800	PBD2	Encodes 20S proteasome beta subunit PBD2 (PBD2).	1.31897	1.45362e-35	UP
AT4G02075	PIT1	NA	1.31863	4.74908e-09	UP
AT4G35110	PEARLI	NA	1.31777	2.5109e-08	UP
AT5G45800	MEE62	NA	1.31721	8.97899e-16	UP
AT3G26910	NA	NA	1.31692	3.30492e-19	UP
AT4G27070	TSB2	Tryptophan synthase beta. Expressed at low levels in all tissues.	1.31692	2.02625e-07	UP
AT4G28085	NA	NA	1.31654	4.7485e-05	UP
AT1G04980	ATPDI10	Encodes a protein disulfide isomerase-like (PDIL) protein, a member of a multigene family within the thioredoxin (TRX) superfamily. Transcript levels for this gene are up-regulated in response to three different chemical inducers of ER stress (dithiothreitol, beta-mercaptoethanol, and tunicamycin). AtIRE1-2 does not appear to be required for this response, but the atbzip60 mutant has a diminished…	1.31587	6.03573e-07	UP
AT3G56290	NA	NA	1.3156	1.49724e-28	UP
AT3G44100	NA	NA	1.31555	1.97578e-28	UP
AT3G48890	ATMAPR3	putative progesterone-binding protein homolog (Atmp2) mRNA,	1.31516	3.30474e-14	UP
AT1G66580	RPL10C	NA	1.3148	5.01401e-20	UP
AT2G18680	NA	NA	1.31429	0.000243247	UP
AT3G18560	NA	NA	1.31416	3.63185e-08	UP
AT4G32250	KOC1	NA	1.31369	1.03692e-26	UP
AT3G61960	NA	NA	1.31312	1.6772e-30	UP
AT1G60610	NA	NA	1.31043	3.61018e-08	UP
AT1G52200	NA	NA	1.31029	1.61653e-10	UP
AT2G32540	ATCSLB04	encodes a gene similar to cellulose synthase	1.31029	2.18967e-17	UP
AT1G62540	FMO	belongs to the flavin-monooxygenase (FMO) family, encodes a glucosinolate S-oxygenase that catalyzes the conversion of methylthioalkyl glucosinolates to methylsulfinylalkyl glucosinolates	1.30938	1.16076e-07	UP
AT2G38740	NA	NA	1.3093	2.33459e-20	UP
AT4G15236	ABCG43	NA	1.30747	0.00207546	UP
AT4G00960	NA	NA	1.30581	0.00189444	UP
AT3G29575	AFP3	NA	1.30562	2.2467e-08	UP
AT1G29195	NA	NA	1.30519	0.00737409	UP
AT5G59890	ADF4	actin depolymerizing factor 4 (ADF4) mRNA, complete cds	1.30501	1.10175e-37	UP
AT3G61760	ADL1B	NA	1.3023	0.000234747	UP
AT2G25450	GSL-OH	encodes a protein whose sequence is similar to ACC oxidase	1.30215	8.13971e-15	UP
AT1G69520	NA	NA	1.3018	1.14856e-06	UP
AT3G23920	AtBAM1	Encodes a chloroplast beta-amylase. Is necessary for leaf starch breakdown in the absence of BAM3.	1.30168	1.04861e-12	UP
AT4G19960	ATKUP9	Encodes a potassium ion transmembrane transporter. Also mediates cesium uptake when expressed in E. coli.	1.30102	6.03277e-18	UP
AT5G52450	NA	NA	1.30032	1.47e-16	UP
AT2G48090	NA	NA	1.29855	0.00856689	UP
AT3G60080	NA	NA	1.29846	8.99909e-18	UP
AT5G20830	ASUS1	Encodes a protein with sucrose synthase activity (SUS1).	1.29815	5.36297e-15	UP
AT1G19020	NA	NA	1.29787	7.25272e-05	UP
AT1G77510	ATPDI6	Encodes a protein disulfide isomerase-like (PDIL) protein, a member of a multigene family within the thioredoxin (TRX) superfamily. Transcript levels for this gene are up-regulated in response to three different chemical inducers of ER stress (dithiothreitol, beta-mercaptoethanol, and tunicamycin). AtIRE1-2 does not appear to be required for this response, but the atbzip60 mutant has a diminished…	1.29694	4.42699e-10	UP
AT3G46900	COPT2	encodes a member of copper transporter family and functionally complements a high affinity copper transporter mutant in yeast	1.29624	8.27885e-07	UP
AT2G26440	PME12	NA	1.29613	8.95624e-18	UP
AT2G38690	NA	NA	1.29473	0.028064	UP
AT5G17990	pat1	Encodes the tryptophan biosynthetic enzyme phosphoribosylanthranilate transferase (PAT1, called trpD in bacteria). Converts anthranilate and phosphoribosylpyrophosphate into phosphoribosylanthranilate and inorganic pyrophosphate.	1.29424	7.94568e-15	UP
AT1G51760	IAR3	encodes a member of the six Arabidopsis IAA-amino acid conjugate hydrolase subfamily and conjugates and conjugates IAA-Ala in vitro. Gene is expressed most strongly in roots, stems, and flowers.	1.29301	0.00479195	UP
AT3G54950	PLA	NA	1.29269	8.02358e-11	UP
AT3G50910	NA	NA	1.29155	7.89917e-11	UP
AT5G16970	AER	encodes a 2-alkenal reductase (EC 1.3.1.74), plays a key role in the detoxification of reactive carbonyls	1.29131	1.44202e-39	UP
AT1G71100	RSW10	Encodes a ribose 5-phosphate isomerase involved in the formation of uridine used for the synthesis of UDP-sugars. Mutants of this gene are affected in cellulose biosynthesis.	1.29131	6.97798e-17	UP
AT1G18890	ATCDPK1	encodes a calcium-dependent protein kinase whose gene expression is induced by dehydration and high salt. Kinase activity could not be detected in vitro.	1.2913	6.30326e-12	UP
AT1G79680	ATWAKL10	NA	1.29118	1.76925e-05	UP
AT2G02870	NA	NA	1.29058	2.26936e-30	UP
AT1G51790	NA	NA	1.29058	3.56477e-16	UP
AT4G14020	NA	NA	1.29052	5.70162e-20	UP
AT5G04860	NA	NA	1.29048	2.0871e-16	UP
AT2G47130	AtSDR3	NA	1.29042	3.12198e-14	UP
AT1G02820	AtLEA3	NA	1.28998	3.77357e-08	UP
AT5G66890	NRG1.3	NA	1.28993	0.0014394	UP
AT1G51680	4CL.1	encodes an isoform of 4-coumarate:CoA ligase (4CL), which is involved in the last step of the general phenylpropanoid pathway. In addition to 4-coumarate, it also converts ferulate. The catalytic efficiency was in the following (descending) order: p-coumaric acid, ferulic acid, caffeic acid and 5-OH-ferulic acid. At4CL1 was unable to use sinapic acid as substrate.	1.28959	1.65816e-21	UP
AT1G16300	GAPCP-2	Encodes one of the chloroplast/plastid localized GAPDH isoforms (GAPCp1/At1g79530 and GAPCp2/At1g16300). gapcp double mutants display a drastic phenotype of arrested root development, dwarfism and sterility. GAPCps are important for the synthesis of serine in roots.	1.28941	1.63125e-06	UP
AT5G40780	AtLHT1	Encodes LHT1 (lysine histidine transporter), a high-affinity transporter for cellular amino acid uptake in both root epidermis and leaf mesophyll.	1.28773	5.48651e-11	UP
AT5G15845	NA	NA	1.28606	0.0346332	UP
AT3G53260	ATPAL2	Encodes phenylalanine lyase. Arabidopsis has four PALs: AT2G37040 (PAL1), AT3G53260 (PAL2), AT5G04230 (PAL3) and AT3G10340 (PAL4).	1.28585	3.03256e-20	UP
AT1G22840	ATCYTC-A	Encodes cytochrome c. Contains two site II (TGGGCC/T) elements, which interact with a TCP-domain transcription factor, and a downstream internal telomeric repeat, and are required for expression of the Cytc-1 gene. Promoter directs preferential expression in root and shoot meristems and in anthers.	1.28513	2.06993e-33	UP
AT3G11690	NA	NA	1.28505	2.69673e-07	UP
AT5G62820	CASPL4A2	NA	1.28487	7.38355e-06	UP
AT2G42350	NA	NA	1.28326	5.68925e-05	UP
AT5G22630	ADT5	Encodes a plastid-localized arogenate dehydratase involved in phenylalanine biosynthesis. Not less than six genes encoding ADT were identi&#64257;ed in the Arabidopsis genome: ADT1 [At1g11790]; ADT2 [At3g07630]; ADT3 [At2g27820]; ADT4 [At3g44720]; ADT5 [At5g22630]; and ADT6 [At1g08250].	1.28157	4.271e-11	UP
AT1G07160	NA	NA	1.28154	0.0368692	UP
AT5G54840	ATSGP1	Monomeric G protein. Expressed in the root quiescent center, flowers, and leaf guard cells and hydathodes.	1.28115	1.67924e-09	UP
AT5G38250	NA	NA	1.28115	2.7885e-06	UP
AT1G25400	NA	NA	1.28088	3.83017e-09	UP
AT1G61415	NA	NA	1.28081	0.000931564	UP
AT2G17730	NIP2	Intrinsic thylakoid membrane protein that fixes RPOTmp on the stromal side of the thylakoid membrane.	1.28049	4.53183e-18	UP
AT1G23010	LPR1	Encodes a protein with multicopper oxidase activity. Located in ER. Function together with LPR2 (AT1G71040) and a P5-type ATPase (At5g23630/PDR2) in a common pathway that adjusts root meristem activity to Pi (inorganic phosphate) availability.	1.27993	4.82583e-07	UP
AT5G27600	ATLACS7	Encode peroxisomal long-chain acyl-CoA synthetase. Activates fatty acids for further metabolism. Interacts with PEX5.	1.27944	9.38195e-13	UP
AT5G40580	PBB2	Encodes 20S proteasome beta subunit PBB2 (PBB2).	1.27888	7.3776e-33	UP
AT5G10695	NA	NA	1.27884	3.91639e-06	UP
AT5G28540	BIP1	Encodes the luminal binding protein BiP, an ER-localized member of the HSP70 family. BiP is composed of an N-terminal ATP binding domain and a C-terminal domain that binds to hydrophobic patches on improperly/incompletely folded proteins in an ATP-dependent manner. Involved in polar nuclei fusion during proliferation of endosperm nuclei.	1.27805	1.18564e-10	UP
AT3G58600	NA	NA	1.27733	1.32488e-14	UP
AT2G40095	NA	NA	1.27719	5.62143e-08	UP
AT4G16260	NA	NA	1.27718	3.10934e-05	UP
AT4G27730	ATOPT6	oligopeptide transporter	1.27707	3.59559e-09	UP
AT4G33040	ROXY21	NA	1.2769	8.78468e-12	UP
AT3G17800	NA	mRNA level of the MEB5.2 gene (At3g17800) remains unchanged after cutting the inflorescence stem	1.27669	6.37216e-17	UP
AT3G24500	ATMBF1C	One of three genes in A. thaliana encoding multiprotein bridging factor 1, a highly conserved transcriptional coactivator. May serve as a bridging factor between a bZIP factor and TBP. Its expression is specifically elevated in response to pathogen infection, salinity, drought, heat, hydrogen peroxide, and application of abscisic acid or salicylic acid. Constitutive expression enhances the tolera…	1.2765	2.54936e-10	UP
AT2G19710	ISTL5	NA	1.27538	7.48734e-10	UP
AT1G61140	EDA16	NA	1.27485	8.3896e-27	UP
AT1G10070	ATBCAT-2	Encodes a chloroplast branched-chain amino acid aminotransferase. Complements the yeast leu/iso-leu/val auxotrophy mutant.	1.27475	4.26839e-06	UP
AT5G54500	FQR1	Encodes a flavin mononucleotide-binding flavodoxin-like quinone reductase that is a primary auxin-response gene.	1.27428	1.86292e-18	UP
AT1G72900	NA	NA	1.27381	1.6096e-07	UP
AT4G38540	NA	NA	1.2737	8.15021e-08	UP
AT5G59580	UGT76E1	NA	1.27355	0.000341304	UP
AT4G34000	ABF3	Encodes an ABA-responsive element-binding protein with similarity to transcription factors that is expressed in response to stress and abscisic acid.	1.27332	1.31578e-23	UP
AT2G38710	NA	NA	1.27316	2.35011e-27	UP
AT5G39785	NA	NA	1.27047	1.77164e-10	UP
AT5G42380	AtCML37	NA	1.26919	0.00090618	UP
AT2G21350	NA	NA	1.26911	0.00246143	UP
AT4G18580	NA	NA	1.26901	2.81865e-08	UP
AT4G36220	CYP84A1	encodes ferulate 5-hydroxylase (F5H). Involved in lignin biosynthesis.	1.2689	1.46906e-27	UP
AT1G30640	NA	NA	1.26807	2.38773e-15	UP
AT4G28550	NA	NA	1.26788	5.16376e-08	UP
AT5G02100	ORP3A	Encodes a protein that binds to beta-sitosterol and localizes to the ER. The WFDE motif in ORP3a appears to be important for a direct interaction with PVA12 [Plant VAMP-Associated protein 12]. Mutation of this motif causes ORP3a to relocalize to the Golgi and cytosol. The interaction between PVA12 and ORP3a does not appear to be sterol-dependent.	1.26751	2.04336e-09	UP
AT3G57550	AGK2	guanylate kinase	1.26751	2.36214e-12	UP
AT4G11890	ARCK1	NA	1.26749	1.16265e-10	UP
AT4G27852	NA	NA	1.26552	0.00785364	UP
AT4G26850	GGP	Encodes a novel protein involved in ascorbate biosynthesis, which was shown to catalyze the transfer of GMP from GDP-galactose to a variety of hexose-1-phosphate acceptors. Recessive mutation has a reduced amount of vitamin C, lower level of non-photochemical quenching, and reduced rate of conversion of violaxanthin to zeaxanthin in high light.	1.26542	2.3827e-35	UP
AT5G50350	NA	NA	1.26436	1.98743e-23	UP
AT5G67450	AZF1	Encodes zinc-finger protein. mRNA levels are elevated in response to low temperature, cold temperatures and high salt. The protein is localized to the nucleus and acts as a transcriptional repressor.	1.26419	9.14222e-05	UP
AT1G62790	NA	NA	1.2628	1.60385e-24	UP
AT2G30840	NA	encodes a protein whose sequence is similar to 2-oxoglutarate-dependent dioxygenase	1.2625	0.0017362	UP
AT4G28420	NA	NA	1.26103	0.000380449	UP
AT3G09010	NA	NA	1.26054	1.00366e-07	UP
AT1G70810	CAR7	NA	1.26016	1.27458e-14	UP
AT5G01340	AtmSFC1	NA	1.25993	1.14815e-06	UP
AT2G27080	NHL13	NA	1.25936	0.00293735	UP
AT3G59150	NA	NA	1.25933	4.21478e-07	UP
AT1G67810	SUFE2	Encodes a protein capable of stimulating the cysteine desulfurase activity of CpNifS (AT1G08490) in vitro. SufE2:GFP localizes to the chloroplasts where it is likely to play a role in iron-sulfur cluster assembly. Transcript levels for this gene are high in the pollen relative to other organs based on RT-PCR analysis.	1.25905	0.000128206	UP
AT3G45620	NA	This gene is predicted to encode a protein with a DWD motif. It can bind to DDB1a in Y2H assays, and DDB1b in co-IP assays, and may be involved in the formation of a CUL4-based E3 ubiquitin ligase	1.25806	5.5731e-17	UP
AT1G52080	AR791	unknown function	1.25793	1.66616e-09	UP
AT1G02460	NA	NA	1.2572	2.79843e-11	UP
AT4G18250	NA	NA	1.25662	1.99462e-08	UP
AT4G38960	BBX19	NA	1.25476	0.000521728	UP
AT3G13080	ABCC3	encodes an ATP-dependent MRP-like ABC transporter able to transport glutathione-conjugates as well as chlorophyll catabolites. The expression of this gene is upregulated by herbicide safeners such as benoxacor and fenclorim.	1.25469	2.99485e-13	UP
AT5G54300	NA	NA	1.25328	2.10962e-05	UP
AT5G13200	GER5	NA	1.25309	4.36235e-07	UP
AT3G26290	CYP71B26	putative cytochrome P450	1.25072	6.6527e-24	UP
AT4G33565	NA	NA	1.25025	2.27834e-20	UP
AT4G23300	CRK22	Encodes a cysteine-rich receptor-like protein kinase.	1.24972	9.50072e-24	UP
AT1G25520	NA	NA	1.24907	2.46891e-16	UP
AT1G25220	ASB1	Catalyzes the first step of tryptophan biosynthesis: Chorismate L-Glutamine = Anthranilate Pyruvate L-Glutamate. Functions as a heterocomplex with anthranilate synthase alpha subunit (ASA1 or ASA2).	1.24892	4.65452e-09	UP
AT3G01175	NA	NA	1.24884	0.0316974	UP
AT2G39660	BIK1	Encodes a plasma membrane-localized ser/thr protein kinase that is a crucial component of host response signaling required to activate the resistance responses to Botrytis and A. brassicicola infection. It is likely a negative regulator of salicylic acid accumulation and basal defense against virulent bacterial pathogens.	1.24831	1.41256e-13	UP
AT1G16470	PAB1	Encodes 20S proteasome subunit PAB1 (PAB1).	1.24782	1.01749e-23	UP
AT3G11270	IRP4	NA	1.24765	1.50234e-15	UP
AT3G54680	NA	NA	1.24763	4.83756e-11	UP
AT3G30775	AT-POX	Encodes a proline oxidase that is predicted to localize to the inner mitochondrial membrane, its mRNA expression induced by high levels of Al and by osmotic stress. The promoter contains an L-proline-inducible element.	1.24486	7.01114e-12	UP
AT3G57100	NA	NA	1.24476	0.0158765	UP
AT5G04830	NA	NA	1.24264	1.69525e-34	UP
AT3G60110	NA	NA	1.24251	1.859e-11	UP
AT1G07870	NA	NA	1.24205	5.09996e-07	UP
AT4G11070	AtWRKY41	member of WRKY Transcription Factor; Group III	1.24187	0.00129151	UP
AT5G57070	NA	NA	1.24172	7.41656e-17	UP
AT5G53590	SAUR30	NA	1.24157	9.35539e-10	UP
AT3G12740	ALIS1	Physically interacts with ALA3, and is required for the phospholipid translocase activity of ALA3.	1.24083	9.40791e-13	UP
AT2G37250	ADK	encodes adenylate kinase that is located in the chloroplast involved in the coordination of metabolism and growth	1.24056	9.9107e-26	UP
AT4G08390	SAPX	Encodes a chloroplastic stromal ascorbate peroxidase sAPX. Ascorbate peroxidases are enzymes that scavenge hydrogen peroxide in plant cells. Eight types of APX have been described for Arabidopsis: three cytosolic (APX1, APX2, APX6), two chloroplastic types (stromal sAPX, thylakoid tAPX), and three microsomal (APX3, APX4, APX5) isoforms.	1.23883	3.05208e-32	UP
AT1G78510	AtSPS1	Encodes a protein with solanesyl diphosphate synthase activity.	1.23841	4.48074e-25	UP
AT5G63030	GRXC1	NA	1.23817	1.85445e-31	UP
AT2G31990	NA	NA	1.238	5.63298e-08	UP
AT1G25150	NA	NA	1.23799	0.0376078	UP
AT4G16000	NA	NA	1.23784	3.06286e-07	UP
AT5G58940	CRCK1	Arabidopsis thaliana calmodulin-binding receptor-like kinase mRNA	1.23666	2.07916e-07	UP
AT1G65500	STMP6	NA	1.23665	6.16814e-26	UP
AT1G26690	NA	NA	1.23663	4.63922e-17	UP
AT4G03960	AtPFA-DSP4	NA	1.23654	2.51863e-09	UP
AT2G42280	AKS3	NA	1.23653	5.214e-10	UP
AT5G62260	AHL6	NA	1.23614	0.0159262	UP
AT5G06960	OBF5	Encodes a basic leucine zipper (B-ZIP) containing protein that interacts with NPR1 to promote expression of salicylic acid induced genes. Binds the ocs-element.	1.23612	8.02798e-10	UP
AT1G05300	ZIP5	member of Fe(II) transporter isolog family	1.23575	1.4629e-13	UP
AT5G14780	AtFDH1	Encodes a NAD-dependent formate dehydrogenase.	1.23446	1.95854e-38	UP
AT2G29070	NA	NA	1.23397	5.32504e-10	UP
AT2G44980	ASG3	NA	1.23395	9.47502e-13	UP
AT2G43290	AtCML5	Encodes calmodulin-like MSS3.	1.23369	6.82564e-09	UP
AT1G61550	NA	NA	1.23349	0.0161466	UP
AT2G31060	EMB2785	NA	1.23266	2.29182e-15	UP
AT4G28570	NA	NA	1.23205	1.05348e-29	UP
AT5G23540	NA	NA	1.23176	4.59803e-30	UP
AT5G08380	AGAL1	NA	1.23169	2.7736e-18	UP
AT3G23240	AtERF#092	encodes a member of the ERF (ethylene response factor) subfamily B-3 of ERF/AP2 transcription factor family (ERF1). The protein contains one AP2 domain. There are 18 members in this subfamily including ATERF-1, ATERF-2, AND ATERF-5. EREBP like protein that binds GCC box of ethylene regulated promoters such as basic chitinases. Constitutive expression of ERF1 phenocopies ethylene over production. …	1.23166	0.000410761	UP
AT2G37710	LecRK-IV.1	Induced in response to Salicylic acid.	1.23128	4.41605e-15	UP
AT3G09810	IDH-VI	Encodes a catalytic subunit of the mitochondrially-localized NAD+- dependent isocitrate dehydrogenase	1.23117	9.70828e-30	UP
AT2G46450	ATCNGC12	Member of Cyclic nucleotide gated channel family.Positive regulator of resistance against avirulent fungal pathogen.Suppresses the phenotype conferred by cpr22 in a dosage-dependent manner.	1.23086	6.18255e-18	UP
AT2G39220	PLA	NA	1.22997	2.95454e-13	UP
AT1G30475	NA	NA	1.22991	0.000156759	UP
AT2G38830	NA	NA	1.22872	7.78878e-06	UP
AT1G76620	NA	NA	1.22857	1.55763e-10	UP
AT3G10640	VPS60.1	NA	1.22825	2.99656e-20	UP
AT5G16450	NA	NA	1.22819	1.92602e-10	UP
AT5G62770	NA	NA	1.227	3.37877e-11	UP
AT5G03245	NA	NA	1.22682	0.0285252	UP
AT3G16860	COBL8	NA	1.22663	0.000569559	UP
AT2G44350	ATCS	encodes a mitochrondrion targeted citrate synthase, the first enzyme of the tricarboxylic acid cycle, catalyzing the condensation of acetyl-CoA and oxaloacetate, finally yielding citrate and CoA.	1.22654	7.41079e-43	UP
AT2G24040	NA	NA	1.22602	3.642e-11	UP
AT3G48000	ALDH2	Encodes a putative (NAD+) aldehyde dehydrogenase.	1.22592	6.51178e-33	UP
AT1G24095	NA	NA	1.22539	0.0010643	UP
AT1G28400	NA	NA	1.2251	3.95916e-19	UP
AT1G32690	NA	NA	1.22492	0.00147871	UP
AT5G52900	MAKR6	NA	1.22405	2.71841e-13	UP
AT2G01650	PUX2	encodes a peripheral membrane protein that contains UBX domain and interacts with AtCDC48 in vitro and co-fractionates with membrane-associated but not soluble AtCDC48 in vivo.	1.22375	4.4779e-16	UP
AT5G11260	HY5	Basic leucine zipper (bZIP) transcription factor. Nuclear localization. Involved in light-regulated transcriptional activation of G-box-containing promoters. Negatively regulated by Cop1. Although cytokinins do not appear to affect the gene's promoter activity, they appear to stabilize the protein. HY5 plays a role in anthocyanin accumulation in far-red light and blue light, but not in red light …	1.22368	0.000237426	UP
AT4G15280	NA	NA	1.2233	0.018941	UP
AT1G17360	NA	NA	1.22164	8.19632e-27	UP
AT4G02940	ALKBH10B	NA	1.22144	8.26662e-43	UP
AT5G20910	AIP2	NA	1.21914	3.24665e-16	UP
AT5G02020	SIS	Encodes a protein involved in salt tolerance, names SIS (Salt Induced Serine rich).	1.21883	1.53211e-07	UP
AT2G29950	EFL1	NA	1.2187	0.000673796	UP
AT1G53750	RPT1A	26S proteasome AAA-ATPase subunit RPT1a (RPT1a) mRNA,	1.21666	4.97457e-33	UP
AT4G26270	PFK3	NA	1.21604	3.13747e-17	UP
AT2G41780	NA	NA	1.21591	4.36807e-05	UP
AT1G64950	CYP89A5	member of CYP89A	1.21553	1.16558e-33	UP
AT1G18390	LRK10L1.1	NA	1.21525	3.37709e-12	UP
AT2G31750	UGT74D1	NA	1.21496	5.67481e-10	UP
AT1G06430	FTSH8	encodes a FtsH protease that is localized to the chloroplast	1.21471	6.34704e-42	UP
AT5G33290	XGD1	Acts as a xylogalacturonan xylosyltransferase within the XGA biosynthesis pathway. Involved in pectin biosynthesis.	1.21438	2.59294e-13	UP
AT5G18670	BAM9	putative beta-amylase BMY3 (BMY3)	1.21393	1.88871e-05	UP
AT3G50260	ATERF#011	Encodes a member of the DREB subfamily A-5 of ERF/AP2 transcription factor family. The protein contains one AP2 domain. Involved in defense and freezing stress responses. There are 16 members in this subfamily including RAP2.1, RAP2.9 and RAP2.10.	1.21345	6.79631e-05	UP
AT4G17900	NA	NA	1.21292	8.38953e-12	UP
AT4G36110	SAUR9	NA	1.21288	2.80828e-06	UP
AT5G03630	MDAR2	NA	1.21208	1.33173e-12	UP
AT4G23610	NA	NA	1.21205	1.12144e-05	UP
AT3G29035	ANAC059	Encodes a protein with transcription factor activity. Note: this protein (AT3G29035) on occasion has also been referred to as AtNAC3, not to be confused with the AtNAC3 found at locus AT3G15500.	1.21154	0.00210174	UP
AT5G54140	ILL3	encodes a protein similar to IAA amino acid conjugate hydrolase	1.21145	8.2725e-10	UP
AT5G21482	ATCKX5	This gene used to be called AtCKX5. It encodes a protein whose sequence is similar to cytokinin oxidase/dehydrogenase, which catalyzes the degradation of cytokinins.	1.21081	6.45913e-20	UP
AT4G27450	NA	NA	1.21027	1.82438e-13	UP
AT1G70250	NA	Encodes a Protease inhibitor/seed storage/LTP family protein	1.20991	1.2877e-19	UP
AT5G01732	NA	NA	1.20819	0.0289471	UP
AT3G05830	AtNEAP1	Encodes alpha-helical IF (intermediate filament)-like protein.	1.20589	7.02838e-11	UP
AT1G08230	NA	NA	1.2046	2.54107e-12	UP
AT5G64510	TIN1	NA	1.20452	3.41674e-05	UP
AT3G22160	JAV1	NA	1.20443	3.96869e-10	UP
AT5G22060	ATJ2	Co-chaperonin similar to E. coli DnaJ	1.20318	4.66612e-15	UP
AT3G45300	ATIVD	Encodes isovaleryl-coenzyme a dehydrogenase. Mutants have increases in 12 seed free amino acids, accumulation of seed homomethionine and 3-isovaleroyloxypropyl-glucosinolate, with a concomitant decrease in seed 3-benzoyloxypropyl-glucosinolate.	1.20281	4.35711e-27	UP
AT2G21620	RD2	Encodes gene that is induced in response to dessication; mRNA expression is seen 10 and 24 hrs after start of dessication treatment.	1.20194	7.25409e-23	UP
AT2G39270	NA	NA	1.20102	4.22606e-28	UP
AT3G13380	BRL3	Similar to BRI, brassinosteroid receptor protein.	1.2007	3.35076e-18	UP
AT5G11090	NA	NA	1.19971	1.26091e-17	UP
AT5G44820	NA	NA	1.19938	1.7218e-13	UP
AT4G34150	NA	NA	1.19897	8.57886e-08	UP
AT3G11840	PUB24	Encodes a U-box-domain-containing E3 ubiquitin ligase that acts as a negative regulator of PAMP-triggered immunity.	1.19867	8.50338e-08	UP
AT3G44320	AtNIT3	This enzyme catalyzes the hydrolysis of indole-3-acetonitrile (IAN) to indole-3-acetic acid (IAA) (EC 3.5.5.1) and IAN to indole-3-acetamide (IAM) at lower levels. It is the only one of the four Arabidopsis nitrilases whose mRNA levels are strongly induced when plants experience sulphur deprivation. This enzyme likely participates in other non-auxin-related metabolic pathways.	1.1986	3.48423e-12	UP
AT3G06810	IBR3	Encodes a protein with similarity to acyl-CoA dehydrogenases. Mutations in IBR3 render plants resistant to indole-3-butryic acid, a putative storage form of the biologically active auxin IAA (indole-3-acetic acid). IBR3 is hypothesized to carry out the second step in a &#946;-oxidation-like process of IBA metabolism in Arabidopsis. Though its subcellular location has not been determined, IBR3 has…	1.19719	5.81425e-35	UP
AT2G02230	AtPP2-B1	NA	1.19662	3.95563e-13	UP
AT2G47470	ATPDI11	Encodes a protein disulfide isomerase-like (PDIL) protein, a member of a multigene family within the thioredoxin (TRX) superfamily. Transcript levels for this gene are up-regulated in response to three different chemical inducers of ER stress (dithiothreitol, beta-mercaptoethanol, and tunicamycin). AtIRE1-2 does not appear to be required for this response, but the atbzip60 mutant has a diminished…	1.19653	2.29061e-11	UP
AT3G17000	UBC32	NA	1.19638	6.21123e-20	UP
AT3G56080	NA	NA	1.1961	1.06228e-19	UP
AT5G53830	MVQ3	NA	1.19596	7.30289e-08	UP
AT4G33050	AtIQM1	NA	1.19516	3.12763e-07	UP
AT5G60270	LecRK-I.7	NA	1.19494	9.45087e-15	UP
AT2G40000	ATHSPRO2	NA	1.19355	1.51362e-08	UP
AT2G22800	HAT9	Encodes homeobox protein HAT9.	1.19243	0.000384572	UP
AT5G60730	AtGET3c	NA	1.19198	0.0129784	UP
AT2G42890	AML2	A member of mei2-like gene family, predominantly plant-based family of genes encoding RNA binding proteins with characteristic presence of a highly conserved RNA binding motif first described in the mei2 gene of the fission yeast S. pombe. In silico analyses reveal nine mei2 -like genes in A. thaliana. They were grouped into four distinct clades, based on overall sequence similarity and subfamily…	1.19147	3.36507e-18	UP
AT4G32480	NA	NA	1.19118	1.88473e-07	UP
AT2G29460	ATGSTU4	Encodes glutathione transferase belonging to the tau class of GSTs. Naming convention according to Wagner et al. (2002).	1.19026	0.000162488	UP
AT3G53120	VPS37-1	NA	1.19016	4.71301e-15	UP
AT1G02930	ATGST1	Encodes glutathione transferase belonging to the phi class of GSTs. Naming convention according to Wagner et al. (2002).	1.18806	5.07512e-07	UP
AT2G26695	NA	NA	1.18784	0.0356871	UP
AT1G50740	NA	NA	1.18617	3.76924e-16	UP
AT1G10417	NA	Encodes protein with unknown function whose expression is repressed by inoculation with Agrobacterium tumerifaciens.	1.18608	0.00457616	UP
AT3G55690	NA	NA	1.186	0.00367243	UP
AT5G16980	NA	NA	1.1852	0.00371988	UP
AT5G02550	NA	NA	1.18365	0.0442605	UP
AT4G13540	NA	NA	1.18364	0.0274791	UP
AT4G14365	XBAT34	NA	1.18342	2.32605e-06	UP
AT2G15390	atfut4	Predicted fucosyltransferase, based on similarity to FUT1, but not functionally redundant with FUT1.	1.18266	4.03071e-08	UP
AT3G15810	NA	NA	1.18241	3.03675e-22	UP
AT5G56150	UBC30	NA	1.18164	1.35424e-25	UP
AT4G36710	AtHAM4	NA	1.18153	1.47552e-18	UP
AT5G05110	NA	NA	1.18122	6.49899e-17	UP
AT4G21470	ATFMN/FHY	Bifunctional enzyme that catalyzes hydrolysis of FMN to riboflavin, and phosphorylation of riboflavin to FMN.	1.18033	6.1179e-21	UP
AT2G43320	NA	NA	1.18027	3.03901e-10	UP
AT1G69450	NA	NA	1.18026	9.67796e-17	UP
AT2G21430	NA	NA	1.17971	0.000892694	UP
AT5G40230	UMAMIT37	NA	1.17964	5.43407e-07	UP
AT5G34930	NA	NA	1.17923	2.83293e-18	UP
AT2G46270	GBF3	encodes a bZIP G-box binding protein whose expression is induced by ABA. It has been shown to bind to Adh that contains the G-box and is induced by cold and water deprivation. GBF3 has been shown to be expressed mostly in the root and dark-grown leaves. GBF3 can act as homodimers and as heterodimers with GFB1, GBF2 and GBF4. In addition, GBF3s DNA binding activity is enhanced by GIP1, GPRI1 and G…	1.17822	1.49374e-06	UP
AT2G02370	NA	NA	1.17762	3.08766e-09	UP
AT1G05570	ATGSL06	Encodes a callose synthase 1 catalytic subunit . Member of Glycosyltransferase Family- 48.	1.17611	2.50382e-15	UP
AT1G60890	NA	NA	1.17414	2.47466e-29	UP
AT1G51140	AKS1	NA	1.17414	3.03305e-15	UP
AT4G17070	NA	NA	1.17343	1.45305e-15	UP
AT3G17510	CIPK1	Encodes a CBL-interacting protein kinase. Specifically interacts with ECT1 and ECT2.	1.17343	2.41236e-19	UP
AT3G48180	NA	NA	1.17259	0.0148389	UP
AT1G76960	NA	NA	1.17259	6.02146e-11	UP
AT5G18130	NA	NA	1.1723	2.76068e-10	UP
AT4G27480	NA	NA	1.17211	2.47786e-07	UP
AT4G33360	FLDH	Encodes an NAD+-dependent dehydrogenase that oxidizes farnesol more efficiently than other prenyl alcohol substrates.	1.1719	6.93467e-31	UP
AT2G02220	ATPSKR1	Encodes a protein interacting with phytosulfokine, a five amino acid sulfated peptide (YIYTQ).	1.17186	2.85045e-16	UP
AT1G69410	ATELF5A-3	Encodes eIF5A-2, a putative eukaryotic translation initiation factor. There are three eIF5A coding genes in Arabidopsis: eIF5A-1/At1g13950, eIF5A-2/At1g26630 and eIF5A-3/At1g69410.	1.17183	1.90479e-26	UP
AT5G39950	ATH2	encodes a cytosolic thioredoxin that reduces disulfide bridges of target proteins by the reversible formation of a disulfide bridge between two neighboring Cys residues present in the active site. Thioredoxins have been found to regulate a variety of biological reactions in prokaryotic and eukaryotic cells.	1.17152	4.2754e-24	UP
AT5G03560	NA	NA	1.17137	1.22792e-15	UP
AT2G27360	NA	NA	1.17113	8.88727e-10	UP
AT5G01610	NA	NA	1.1702	5.44535e-08	UP
AT2G34940	BP80-3;2	NA	1.17012	6.65431e-10	UP
AT1G67940	ABCI17	member of NAP subfamily	1.16911	1.51173e-19	UP
AT3G08760	ATSIK	Encodes an osmotic stress-inducible kinase that functions as a negative regulator of osmotic stress signaling in plants.	1.1691	2.45515e-24	UP
AT4G03550	ATGSL05	Encodes a callose synthase that is required for wound and papillary callose formation in response to fungal pathogens Erysiphe and Blumeria. Mutants are resistant to P. parasitica and exhibit an exaggerated PR1 response.Contributes to PAMP-induced basal defense.	1.16844	3.40286e-40	UP
AT2G32160	NA	NA	1.16802	5.18555e-14	UP
AT4G24920	NA	NA	1.16737	6.94843e-11	UP
AT5G58730	Mik	NA	1.1669	3.84031e-08	UP
[truncated: 6,901 more rows]
