# Supplementary material for: The tRNA thiolation-mediated translational control is essential for plant immunity
Source: eLife. 2024 Jan 29;13:e93517. doi: 10.7554/eLife.93517 (PMC10863982; doi:10.7554/eLife.93517)
Supplement: Figure 4—source data 6. [file elife-93517-fig4-data6.xlsx]

## Sheet: attenuated proteins
The enriched GO terms of attenuated proteins.
GO_ID	Description	GeneRatio	BgRatio	pvalue	TAIR_Locus	Count
GO:0009404	toxin metabolic process	14/315	61/22094	1.32481e-13	AT1G02930/AT4G02520/AT1G02920/AT3G26830/AT2G30770/AT1G78380/AT3G52430/AT2G02390/AT2G29490/AT2G29460/AT3G09270/AT1G17170/AT2G29470/AT1G74590	14
GO:0042742	defense response to bacterium	30/315	455/22094	3.6833e-12	AT1G02930/AT4G02520/AT1G02920/AT3G54640/AT2G30770/AT4G23150/AT3G49120/AT2G47130/AT4G11850/AT5G24530/AT1G51890/AT2G37710/AT5G48380/AT2G45220/AT2G25110/AT2G19190/AT3G52430/AT3G46510/AT5G06320/AT4G39090/AT5G14930/AT1G64280/AT4G23210/AT3G04720/AT4G23270/AT4G23200/AT4G39030/AT2G23810/AT1G73805/AT1G19250	30
GO:0001666	response to hypoxia	22/315	266/22094	4.16223e-11	AT5G19550/AT5G25250/AT2G26560/AT5G24530/AT2G41100/AT1G66880/AT4G26270/AT3G52430/AT5G06320/AT1G09070/AT5G58070/AT1G26380/AT4G34150/AT5G20230/AT1G64280/AT1G74310/AT1G67360/AT1G02360/AT1G19020/AT5G19240/AT1G19250/AT5G13190	22
GO:0036293	response to decreased oxygen levels	22/315	270/22094	5.56616e-11	AT5G19550/AT5G25250/AT2G26560/AT5G24530/AT2G41100/AT1G66880/AT4G26270/AT3G52430/AT5G06320/AT1G09070/AT5G58070/AT1G26380/AT4G34150/AT5G20230/AT1G64280/AT1G74310/AT1G67360/AT1G02360/AT1G19020/AT5G19240/AT1G19250/AT5G13190	22
GO:0070482	response to oxygen levels	22/315	271/22094	5.98073e-11	AT5G19550/AT5G25250/AT2G26560/AT5G24530/AT2G41100/AT1G66880/AT4G26270/AT3G52430/AT5G06320/AT1G09070/AT5G58070/AT1G26380/AT4G34150/AT5G20230/AT1G64280/AT1G74310/AT1G67360/AT1G02360/AT1G19020/AT5G19240/AT1G19250/AT5G13190	22
GO:0002376	immune system process	27/315	429/22094	1.32389e-10	AT1G02920/AT3G26830/AT2G43570/AT2G30770/AT5G52810/AT2G26560/AT4G11850/AT2G14610/AT3G50930/AT5G38900/AT3G52400/AT3G52430/AT3G46510/AT2G33580/AT5G06320/AT5G14930/AT1G64280/AT4G23210/AT3G04720/AT2G18660/AT4G39030/AT4G04920/AT1G73805/AT2G35980/AT1G19250/AT5G13190/AT3G23780	27
GO:0009751	response to salicylic acid	16/315	170/22094	3.09992e-09	AT1G21250/AT3G50930/AT5G24530/AT2G37710/AT2G04450/AT3G52400/AT1G15520/AT3G52430/AT4G10500/AT5G06320/AT4G04695/AT1G64280/AT4G23270/AT4G32940/AT4G39030/AT1G79680	16
GO:0006979	response to oxidative stress	25/315	468/22094	1.80318e-08	AT1G02930/AT4G37530/AT4G23150/AT3G49120/AT1G78380/AT4G11850/AT4G37520/AT1G15520/AT1G45145/AT3G13610/AT2G37130/AT5G58070/AT5G05340/AT5G20230/AT1G65970/AT5G63030/AT5G27830/AT5G19880/AT1G19020/AT4G21850/AT2G40880/AT1G13340/AT3G17800/AT1G05680/AT1G21520	25
GO:0008219	cell death	14/315	187/22094	5.24091e-07	AT1G21750/AT2G26560/AT3G50930/AT5G48380/AT3G52400/AT4G34180/AT3G13610/AT3G52430/AT3G46510/AT1G64280/AT4G23210/AT2G38530/AT1G19250/AT5G13190	14
GO:0007568	aging	12/315	174/22094	7.97294e-06	AT5G37600/AT2G43570/AT5G24530/AT2G29350/AT3G52430/AT4G10500/AT5G62000/AT5G14930/AT4G30270/AT4G32940/AT2G35980/AT3G25010	12
GO:0046686	response to cadmium ion	15/315	320/22094	6.13594e-05	AT5G02490/AT1G77510/AT1G02930/AT4G02520/AT5G13420/AT1G02920/AT2G37760/AT1G78380/AT2G26560/AT1G75950/AT5G64250/AT1G45145/AT5G51830/AT2G41380/AT3G09270	15
GO:0015914	phospholipid transport	4/315	20/22094	0.000163987	AT3G25610/AT5G04930/AT3G12740/AT2G38530	4
GO:0034976	response to endoplasmic reticulum stress	7/315	97/22094	0.00048093	AT5G28540/AT1G21750/AT1G77510/AT1G09080/AT1G52260/AT4G04180/AT2G29070	7
GO:0006623	protein targeting to vacuole	5/315	48/22094	0.000591372	AT4G20110/AT1G30900/AT1G09070/AT2G34940/AT4G23700	5
GO:0007034	vacuolar transport	7/315	110/22094	0.0010184	AT4G20110/AT1G30900/AT1G09070/AT5G63880/AT1G03950/AT2G34940/AT4G23700	7
GO:0002221	pattern recognition receptor signaling pathway	3/315	16/22094	0.00140066	AT3G62600/AT3G49120/AT2G25110	3
GO:0030433	ubiquitin-dependent ERAD pathway	4/315	43/22094	0.00322938	AT5G28540/AT1G09080/AT4G04180/AT2G29070	4
GO:1901616	organic hydroxy compound catabolic process	4/315	45/22094	0.00381314	AT5G24530/AT4G10500/AT2G02390/AT5G64000	4
