# Supplementary material for: The tRNA thiolation-mediated translational control is essential for plant immunity
Source: eLife. 2024 Jan 29;13:e93517. doi: 10.7554/eLife.93517 (PMC10863982; doi:10.7554/eLife.93517)
Supplement: Figure 5—source data 4. [file elife-93517-fig5-data4.xlsx]

## Sheet: Figure 5C-Source Data
Fraction	Position	Absorbance(Abs)	Sample
0	0	1.33847	COM
0	0.04	4.88425	COM
0	0.08	2.14299	COM
0	0.12	4.07102	COM
0	0.16	1.13821	COM
0	0.2	0.910756	COM
0	0.24	0.828657	COM
0	0.28	0.807414	COM
0	0.32	0.828032	COM
0	0.36	0.84811	COM
0	0.4	0.816857	COM
0	0.44	0.808313	COM
0	0.47	0.815926	COM
0	0.51	0.808928	COM
0	0.55	0.805715	COM
0	0.59	0.803903	COM
0	0.63	0.816481	COM
0	0.67	0.790377	COM
0	0.71	0.809513	COM
0	0.75	0.790533	COM
0	0.79	0.804351	COM
0	0.83	0.787695	COM
0	0.87	0.791158	COM
0	0.91	0.793166	COM
0	0.95	0.783483	COM
0	0.99	0.783831	COM
0	1.03	0.784472	COM
0	1.07	0.779175	COM
0	1.11	0.783748	COM
0	1.15	0.779739	COM
0	1.19	0.772159	COM
0	1.23	0.776444	COM
0	1.27	0.771003	COM
0	1.3	0.772179	COM
0	1.35	0.772791	COM
0	1.38	0.766009	COM
0	1.43	0.767499	COM
0	1.47	0.768368	COM
0	1.51	0.760093	COM
0	1.55	0.766522	COM
0	1.59	0.758579	COM
0	1.63	0.759521	COM
0	1.67	0.757632	COM
0	1.71	0.773463	COM
0	1.74	0.862116	COM
0	1.78	0.974925	COM
0	1.82	1.06167	COM
0	1.86	1.06215	COM
0	1.9	1.44773	COM
0	1.94	5.68914	COM
0	1.98	4.91306	COM
0	2.02	5.046	COM
0	2.06	5.29001	COM
0	2.1	5.46055	COM
0	2.14	5.58629	COM
0	2.18	5.74883	COM
0	2.22	5.90992	COM
0	2.26	6.0514	COM
0	2.3	6.15622	COM
0	2.34	6.26914	COM
0	2.38	6.46926	COM
0	2.42	6.63429	COM
0	2.46	6.74958	COM
0	2.5	6.89974	COM
0	2.54	7.08864	COM
0	2.58	7.2058	COM
0	2.61	7.36864	COM
0	2.65	7.46652	COM
0	2.69	7.57313	COM
0	2.73	7.71844	COM
0	2.77	7.90247	COM
0	2.81	8.05338	COM
0	2.86	8.19136	COM
0	2.89	8.30591	COM
0	2.93	8.42652	COM
0	2.97	8.50964	COM
0	3.01	8.58763	COM
0	3.05	8.72338	COM
0	3.09	8.83564	COM
0	3.13	8.92132	COM
0	3.17	9.034	COM
0	3.21	9.11645	COM
0	3.25	9.15748	COM
0	3.29	9.23057	COM
0	3.33	9.23142	COM
0	3.37	9.26368	COM
0	3.41	9.28426	COM
0	3.45	9.32127	COM
0	3.49	9.34269	COM
0	3.53	9.39594	COM
0	3.57	9.45088	COM
0	3.61	9.45345	COM
0	3.65	9.48031	COM
0	3.69	9.47533	COM
0	3.73	9.5113	COM
0	3.77	9.53595	COM
0	3.8	9.56298	COM
0	3.85	9.58532	COM
0	3.88	9.62675	COM
0	3.93	9.65025	COM
0	3.96	9.67997	COM
0	4	9.70522	COM
0	4.04	9.7078	COM
0	4.08	9.74016	COM
0	4.12	9.76895	COM
0	4.16	9.77056	COM
0	4.2	9.77576	COM
0	4.24	9.80934	COM
0	4.28	9.82177	COM
0	4.32	9.8478	COM
0	4.36	9.83013	COM
0	4.4	9.83328	COM
0	4.44	9.82491	COM
0	4.48	9.79548	COM
0	4.52	9.79107	COM
0	4.56	9.78037	COM
0	4.6	9.77989	COM
0	4.64	9.78934	COM
0	4.68	9.77104	COM
0	4.72	9.73984	COM
0	4.76	9.74111	COM
0	4.8	9.74415	COM
0	4.84	9.78059	COM
0	4.88	9.7806	COM
0	4.92	9.7824	COM
0	4.96	9.81325	COM
0	5	9.83287	COM
0	5.03	9.87393	COM
0	5.07	9.92213	COM
0	5.11	9.92694	COM
0	5.15	9.96191	COM
0	5.19	10.0089	COM
0	5.23	10.0498	COM
0	5.27	10.0783	COM
0	5.31	10.1169	COM
0	5.35	10.1874	COM
0	5.39	10.1836	COM
0	5.43	10.2015	COM
0	5.47	10.2089	COM
0	5.51	10.2144	COM
0	5.55	10.2755	COM
0	5.59	10.3185	COM
0	5.63	10.3994	COM
0	5.67	10.4061	COM
0	5.71	10.4207	COM
0	5.75	10.4981	COM
0	5.79	10.6125	COM
0	5.83	10.5721	COM
0	5.87	10.624	COM
0	5.91	10.7369	COM
0	5.95	10.803	COM
0	5.99	10.8268	COM
0	6.03	10.8827	COM
0	6.07	10.949	COM
0	6.11	10.9355	COM
0	6.14	10.9032	COM
0	6.18	10.9593	COM
0	6.22	11.0159	COM
0	6.26	10.9478	COM
0	6.3	10.9179	COM
0	6.34	10.9048	COM
0	6.38	10.8359	COM
0	6.42	10.8407	COM
0	6.46	10.725	COM
0	6.5	10.6533	COM
0	6.54	10.5736	COM
0	6.58	10.5255	COM
0	6.62	10.4432	COM
0	6.66	10.3479	COM
0	6.7	10.2529	COM
0	6.74	10.1788	COM
0	6.78	10.054	COM
0	6.82	9.95681	COM
0	6.86	9.84624	COM
0	6.9	9.70946	COM
0	6.94	9.58206	COM
0	6.98	9.47255	COM
0	7.02	9.32588	COM
0	7.06	9.15242	COM
0	7.1	8.97706	COM
0	7.14	8.8514	COM
0	7.18	8.67327	COM
0	7.21	8.48315	COM
0	7.26	8.31396	COM
0	7.29	8.13199	COM
0	7.34	7.94633	COM
0	7.37	7.76086	COM
0	7.41	7.56623	COM
0	7.45	7.37341	COM
0	7.5	7.1869	COM
0	7.54	6.98956	COM
0	7.57	6.80502	COM
0	7.61	6.60198	COM
0	7.65	6.40892	COM
0	7.69	6.22024	COM
0	7.73	6.04856	COM
0	7.77	5.88408	COM
0	7.81	5.71982	COM
0	7.85	5.55837	COM
0	7.89	5.4101	COM
0	7.93	5.26437	COM
0	7.97	5.12206	COM
0	8.01	4.9839	COM
0	8.05	4.84073	COM
0	8.09	4.71559	COM
0	8.13	4.59935	COM
0	8.17	4.48152	COM
0	8.21	4.35942	COM
0	8.25	4.2473	COM
0	8.29	4.15541	COM
0	8.33	4.05104	COM
0	8.37	3.95414	COM
0	8.4	3.85796	COM
0	8.45	3.76096	COM
0	8.49	3.67177	COM
0	8.52	3.58412	COM
0	8.56	3.50064	COM
0	8.6	3.41482	COM
0	8.64	3.33571	COM
0	8.68	3.26373	COM
0	8.72	3.19423	COM
0	8.76	3.12499	COM
0	8.8	3.06222	COM
0	8.84	3.00227	COM
0	8.88	2.9381	COM
0	8.92	2.87583	COM
0	8.96	2.82115	COM
0	9	2.7645	COM
0	9.04	2.70464	COM
0	9.08	2.65126	COM
0	9.12	2.59826	COM
0	9.16	2.54681	COM
0	9.2	2.49472	COM
0	9.24	2.44258	COM
0	9.28	2.39237	COM
0	9.32	2.35263	COM
0	9.36	2.30226	COM
0	9.4	2.25266	COM
0	9.44	2.2296	COM
0	9.48	2.16637	COM
0	9.52	2.11871	COM
0	9.56	2.07114	COM
0	9.59	2.03233	COM
0	9.64	1.99145	COM
0	9.68	1.93877	COM
0	9.72	1.89537	COM
0	9.76	1.84997	COM
0	9.79	1.81115	COM
0	9.83	1.77741	COM
0	9.87	1.73577	COM
0	9.91	1.70175	COM
0	9.95	1.66299	COM
0	9.99	1.62799	COM
0	10.03	1.59679	COM
0	10.07	1.56519	COM
0	10.11	1.53382	COM
0	10.15	1.50504	COM
0	10.19	1.47589	COM
0	10.23	1.4469	COM
0	10.27	1.42167	COM
0	10.31	1.39336	COM
0	10.35	1.36633	COM
0	10.39	1.34076	COM
0	10.43	1.31659	COM
0	10.47	1.2956	COM
0	10.51	1.27134	COM
0	10.55	1.24771	COM
0	10.59	1.22607	COM
0	10.63	1.20556	COM
0	10.66	1.18695	COM
0	10.7	1.16878	COM
0	10.75	1.15258	COM
0	10.78	1.13535	COM
0	10.82	1.12254	COM
0	10.86	1.10797	COM
0	10.91	1.09783	COM
0	10.94	1.08858	COM
0	10.99	1.07954	COM
0	11.02	1.07215	COM
0	11.06	1.06475	COM
0	11.1	1.05941	COM
0	11.14	1.05197	COM
0	11.18	1.04516	COM
0	11.22	1.04193	COM
0	11.26	1.03858	COM
0	11.3	1.03334	COM
0	11.34	1.02779	COM
0	11.38	1.02517	COM
0	11.42	1.02186	COM
0	11.46	1.01522	COM
0	11.5	1.00918	COM
0	11.54	0.999873	COM
0	11.58	0.990345	COM
0	11.62	0.983115	COM
0	11.66	0.973943	COM
0	11.7	0.962792	COM
0	11.74	0.952147	COM
0	11.78	0.941663	COM
0	11.82	0.933569	COM
0	11.86	0.921811	COM
0	11.89	0.912692	COM
0	11.93	0.909922	COM
0	11.97	0.890034	COM
0	12.01	0.877257	COM
0	12.05	0.864114	COM
0	12.09	0.852942	COM
0	12.13	0.861221	COM
0	12.17	0.86092	COM
0	12.21	0.889874	COM
0	12.25	0.844371	COM
0	12.29	0.830106	COM
0	12.33	0.817183	COM
0	12.37	0.807424	COM
0	12.41	0.796327	COM
0	12.45	0.778929	COM
0	12.49	0.763117	COM
0	12.53	0.7494	COM
0	12.57	0.734059	COM
0	12.61	0.720289	COM
0	12.65	0.707232	COM
0	12.69	0.693825	COM
0	12.73	0.683928	COM
0	12.77	0.671346	COM
0	12.81	0.662364	COM
0	12.85	0.650108	COM
0	12.89	0.638692	COM
0	12.93	0.628614	COM
0	12.97	0.619497	COM
0	13.01	0.610436	COM
0	13.05	0.601169	COM
0	13.09	0.59192	COM
0	13.12	0.584117	COM
0	13.17	0.576664	COM
0	13.2	0.568307	COM
0	13.24	0.562323	COM
0	13.28	0.557091	COM
0	13.32	0.552231	COM
0	13.36	0.546418	COM
0	13.4	0.541421	COM
0	13.44	0.53655	COM
0	13.48	0.530082	COM
0	13.52	0.528022	COM
0	13.56	0.524321	COM
0	13.6	0.520717	COM
0	13.64	0.515668	COM
0	13.68	0.510577	COM
0	13.72	0.508166	COM
0	13.76	0.503493	COM
0	13.8	0.49974	COM
0	13.84	0.495741	COM
0	13.88	0.487745	COM
0	13.92	0.481702	COM
0	13.96	0.4778	COM
0	14	0.474089	COM
0	14.04	0.472361	COM
0	14.08	0.471904	COM
0	14.11	0.466167	COM
0	14.16	0.463761	COM
0	14.2	0.462578	COM
0	14.24	0.459767	COM
0	14.28	0.457292	COM
0	14.32	0.453261	COM
0	14.36	0.452041	COM
0	14.4	0.449682	COM
0	14.43	0.447326	COM
0	14.47	0.444961	COM
0	14.51	0.444243	COM
0	14.55	0.441686	COM
0	14.59	0.438987	COM
0	14.63	0.437928	COM
0	14.67	0.434851	COM
0	14.71	0.433779	COM
0	14.75	0.432413	COM
0	14.79	0.429319	COM
0	14.83	0.427389	COM
0	14.87	0.425572	COM
0	14.91	0.425271	COM
0	14.95	0.423109	COM
0	14.99	0.419106	COM
0	15.03	0.418565	COM
0	15.07	0.416689	COM
0	15.11	0.41405	COM
0	15.15	0.412865	COM
0	15.19	0.410092	COM
0	15.23	0.409235	COM
0	15.27	0.407781	COM
0	15.31	0.406733	COM
0	15.35	0.406564	COM
0	15.39	0.404897	COM
0	15.43	0.403475	COM
0	15.47	0.404082	COM
0	15.5	0.403979	COM
0	15.55	0.403985	COM
0	15.58	0.407087	COM
0	15.62	0.407051	COM
0	15.66	0.407193	COM
0	15.7	0.407372	COM
0	15.74	0.408433	COM
0	15.78	0.409497	COM
0	15.82	0.410755	COM
0	15.86	0.410411	COM
0	15.9	0.410716	COM
0	15.94	0.411286	COM
0	15.98	0.411407	COM
0	16.02	0.41234	COM
0	16.06	0.413538	COM
0	16.1	0.413743	COM
0	16.14	0.414542	COM
0	16.18	0.414632	COM
0	16.22	0.417557	COM
0	16.26	0.417341	COM
0	16.3	0.418494	COM
0	16.34	0.419903	COM
0	16.38	0.422814	COM
0	16.41	0.424274	COM
0	16.45	0.425298	COM
0	16.49	0.425901	COM
0	16.54	0.426908	COM
0	16.58	0.428808	COM
0	16.61	0.431741	COM
0	16.65	0.432868	COM
0	16.69	0.433475	COM
0	16.73	0.435205	COM
0	16.77	0.436571	COM
0	16.81	0.438738	COM
0	16.85	0.441979	COM
0	16.89	0.442661	COM
0	16.93	0.443361	COM
0	16.97	0.446089	COM
0	17.01	0.448012	COM
0	17.05	0.449084	COM
0	17.09	0.450813	COM
0	17.13	0.456721	COM
0	17.17	0.457258	COM
0	17.21	0.459382	COM
0	17.25	0.460622	COM
0	17.29	0.4596	COM
0	17.33	0.464223	COM
0	17.37	0.464478	COM
0	17.41	0.466006	COM
0	17.45	0.466927	COM
0	17.49	0.467675	COM
0	17.53	0.468113	COM
0	17.57	0.468799	COM
0	17.6	0.46852	COM
0	17.64	0.46547	COM
0	17.69	0.466783	COM
0	17.72	0.466517	COM
0	17.77	0.466013	COM
0	17.8	0.464348	COM
0	17.84	0.461549	COM
0	17.89	0.459927	COM
0	17.92	0.458218	COM
0	17.97	0.455282	COM
0	18	0.45028	COM
0	18.04	0.449515	COM
0	18.08	0.442765	COM
0	18.12	0.438331	COM
0	18.16	0.437081	COM
0	18.2	0.433889	COM
0	18.24	0.427786	COM
0	18.28	0.423594	COM
0	18.32	0.419019	COM
0	18.36	0.412698	COM
0	18.4	0.40907	COM
0	18.44	0.402503	COM
0	18.48	0.397838	COM
0	18.52	0.39234	COM
0	18.56	0.387165	COM
0	18.6	0.381348	COM
0	18.64	0.376048	COM
0	18.68	0.371549	COM
0	18.71	0.367312	COM
0	18.76	0.361685	COM
0	18.8	0.357112	COM
0	18.83	0.351247	COM
0	18.87	0.346672	COM
0	18.91	0.345426	COM
0	18.95	0.341077	COM
0	18.99	0.336727	COM
0	19.04	0.333443	COM
0	19.08	0.328851	COM
0	19.11	0.32759	COM
0	19.15	0.323267	COM
0	19.19	0.32134	COM
0	19.23	0.31859	COM
0	19.27	0.316586	COM
0	19.31	0.312307	COM
0	19.35	0.309505	COM
0	19.39	0.305571	COM
0	19.43	0.306074	COM
0	19.47	0.305506	COM
0	19.51	0.303675	COM
0	19.55	0.302098	COM
0	19.59	0.301433	COM
0	19.63	0.300807	COM
0	19.67	0.300287	COM
0	19.71	0.297804	COM
0	19.75	0.296435	COM
0	19.79	0.29695	COM
0	19.83	0.295983	COM
0	19.87	0.297774	COM
0	19.91	0.296991	COM
0	19.94	0.297079	COM
0	19.99	0.297763	COM
0	20.02	0.297891	COM
0	20.06	0.298968	COM
0	20.1	0.299104	COM
0	20.14	0.299703	COM
0	20.19	0.300947	COM
0	20.23	0.301836	COM
0	20.27	0.304316	COM
0	20.3	0.306192	COM
0	20.34	0.31092	COM
0	20.38	0.309485	COM
0	20.42	0.308373	COM
0	20.46	0.309525	COM
0	20.5	0.311199	COM
0	20.54	0.314582	COM
0	20.58	0.314	COM
0	20.62	0.317527	COM
0	20.66	0.318368	COM
0	20.7	0.318611	COM
0	20.74	0.317984	COM
0	20.78	0.320655	COM
0	20.82	0.322349	COM
0	20.86	0.324025	COM
0	20.9	0.325573	COM
0	20.94	0.327018	COM
0	20.98	0.326845	COM
0	21.02	0.326497	COM
0	21.06	0.327185	COM
0	21.1	0.32817	COM
0	21.13	0.329436	COM
0	21.17	0.329629	COM
0	21.21	0.329103	COM
0	21.25	0.329439	COM
0	21.29	0.327375	COM
0	21.34	0.325895	COM
0	21.38	0.326395	COM
0	21.41	0.324473	COM
0	21.45	0.323781	COM
0	21.49	0.322547	COM
0	21.53	0.321195	COM
0	21.57	0.319743	COM
0	21.61	0.319335	COM
0	21.65	0.317237	COM
0	21.69	0.313796	COM
0	21.73	0.311708	COM
0	21.77	0.308366	COM
0	21.81	0.308366	COM
0	21.85	0.306442	COM
0	21.89	0.306776	COM
0	21.93	0.306302	COM
0	21.97	0.306122	COM
0	22.01	0.305063	COM
0	22.05	0.306037	COM
0	22.09	0.306447	COM
0	22.13	0.309515	COM
0	22.17	0.31382	COM
0	22.21	0.316802	COM
0	22.25	0.321917	COM
0	22.29	0.326074	COM
0	22.32	0.329628	COM
0	22.36	0.33586	COM
0	22.4	0.340941	COM
0	22.44	0.347179	COM
0	22.48	0.354492	COM
0	22.52	0.36182	COM
0	22.56	0.371399	COM
0	22.6	0.376759	COM
0	22.64	0.385484	COM
0	22.68	0.394258	COM
0	22.72	0.404468	COM
0	22.76	0.415817	COM
0	22.8	0.425399	COM
0	22.84	0.435711	COM
0	22.88	0.447261	COM
0	22.92	0.456392	COM
0	22.96	0.465599	COM
0	23	0.474649	COM
0	23.04	0.483607	COM
0	23.08	0.493014	COM
0	23.12	0.499136	COM
0	23.16	0.508044	COM
0	23.2	0.514173	COM
0	23.24	0.520088	COM
0	23.28	0.525517	COM
0	23.32	0.530309	COM
0	23.35	0.536273	COM
0	23.39	0.541547	COM
0	23.44	0.54367	COM
0	23.48	0.54704	COM
0	23.51	0.548271	COM
0	23.55	0.550434	COM
0	23.6	0.552256	COM
0	23.63	0.551582	COM
0	23.67	0.54955	COM
0	23.71	0.548314	COM
0	23.75	0.546358	COM
0	23.79	0.543612	COM
0	23.83	0.539858	COM
0	23.87	0.535367	COM
0	23.91	0.530662	COM
0	23.95	0.525349	COM
0	23.99	0.519836	COM
0	24.03	0.514335	COM
0	24.07	0.507305	COM
0	24.11	0.501874	COM
0	24.15	0.496976	COM
0	24.19	0.492074	COM
0	24.23	0.487921	COM
0	24.27	0.48401	COM
0	24.31	0.481572	COM
0	24.35	0.479819	COM
0	24.39	0.478813	COM
0	24.43	0.478489	COM
0	24.47	0.479066	COM
0	24.5	0.479999	COM
0	24.55	0.481341	COM
0	24.59	0.486727	COM
0	24.63	0.491838	COM
0	24.66	0.496412	COM
0	24.7	0.499978	COM
0	24.75	0.505005	COM
0	24.78	0.512664	COM
0	24.83	0.518763	COM
0	24.86	0.525493	COM
0	24.9	0.533252	COM
0	24.94	0.541243	COM
0	24.98	0.547207	COM
0	25.02	0.55411	COM
0	25.06	0.559532	COM
0	25.1	0.565035	COM
0	25.14	0.570212	COM
0	25.18	0.575197	COM
0	25.22	0.576996	COM
0	25.26	0.580702	COM
0	25.3	0.583936	COM
0	25.34	0.586522	COM
0	25.38	0.586858	COM
0	25.42	0.587688	COM
0	25.46	0.588169	COM
0	25.5	0.589854	COM
0	25.54	0.588267	COM
0	25.58	0.586486	COM
0	25.62	0.586497	COM
0	25.66	0.583418	COM
0	25.7	0.580684	COM
0	25.73	0.577295	COM
0	25.77	0.572369	COM
0	25.82	0.566951	COM
0	25.85	0.562729	COM
0	25.89	0.556472	COM
0	25.93	0.549571	COM
0	25.97	0.543838	COM
0	26.01	0.53538	COM
0	26.05	0.526563	COM
0	26.09	0.520847	COM
0	26.13	0.512597	COM
0	26.17	0.505425	COM
0	26.21	0.498148	COM
0	26.25	0.491214	COM
0	26.29	0.48298	COM
0	26.33	0.474791	COM
0	26.37	0.46716	COM
0	26.41	0.461505	COM
0	26.45	0.456119	COM
0	26.49	0.44986	COM
0	26.53	0.444793	COM
0	26.57	0.438639	COM
0	26.61	0.43419	COM
0	26.65	0.428302	COM
0	26.69	0.423549	COM
0	26.73	0.419159	COM
0	26.77	0.415868	COM
0	26.81	0.413458	COM
0	26.84	0.410367	COM
0	26.89	0.40801	COM
0	26.93	0.406697	COM
0	26.97	0.404524	COM
0	27.01	0.404477	COM
0	27.04	0.404184	COM
0	27.09	0.404399	COM
0	27.12	0.405696	COM
0	27.16	0.407297	COM
0	27.2	0.410062	COM
0	27.24	0.412489	COM
0	27.28	0.4154	COM
0	27.32	0.420669	COM
0	27.36	0.427448	COM
0	27.4	0.432452	COM
0	27.44	0.440418	COM
0	27.48	0.446976	COM
0	27.52	0.455734	COM
0	27.56	0.466163	COM
0	27.6	0.476009	COM
0	27.64	0.4886	COM
0	27.68	0.496984	COM
0	27.72	0.510063	COM
0	27.76	0.522476	COM
0	27.8	0.536008	COM
0	27.84	0.548697	COM
0	27.88	0.559361	COM
0	27.92	0.57236	COM
0	27.96	0.585834	COM
0	28	0.597198	COM
0	28.03	0.609109	COM
0	28.08	0.619142	COM
0	28.12	0.627759	COM
0	28.16	0.637919	COM
0	28.2	0.646505	COM
0	28.24	0.654106	COM
0	28.27	0.66016	COM
0	28.31	0.665435	COM
0	28.35	0.670569	COM
0	28.39	0.674544	COM
0	28.43	0.678552	COM
0	28.47	0.681053	COM
1	28.51	0.682083	COM
1	28.55	0.682877	COM
1	28.59	0.679885	COM
1	28.63	0.677756	COM
1	28.67	0.672593	COM
1	28.71	0.667581	COM
1	28.75	0.660859	COM
1	28.79	0.654155	COM
1	28.83	0.644817	COM
1	28.87	0.634846	COM
1	28.91	0.623468	COM
1	28.95	0.612195	COM
1	28.99	0.60209	COM
1	29.03	0.58826	COM
1	29.07	0.57572	COM
1	29.1	0.563956	COM
1	29.15	0.549937	COM
1	29.19	0.536877	COM
1	29.23	0.524378	COM
1	29.27	0.511076	COM
1	29.31	0.497196	COM
1	29.35	0.485991	COM
1	29.38	0.471312	COM
1	29.43	0.4566	COM
1	29.46	0.444418	COM
1	29.5	0.432981	COM
1	29.54	0.418484	COM
1	29.58	0.408218	COM
1	29.62	0.397391	COM
1	29.66	0.386121	COM
1	29.7	0.376691	COM
1	29.74	0.366289	COM
1	29.78	0.356696	COM
1	29.82	0.34879	COM
1	29.86	0.339478	COM
1	29.9	0.331611	COM
1	29.94	0.323492	COM
1	29.98	0.315564	COM
1	30.02	0.310125	COM
1	30.06	0.302722	COM
1	30.1	0.294625	COM
1	30.14	0.288963	COM
1	30.18	0.286046	COM
1	30.22	0.280933	COM
1	30.26	0.273955	COM
1	30.29	0.269951	COM
1	30.33	0.26574	COM
1	30.38	0.263055	COM
1	30.42	0.258916	COM
1	30.45	0.255234	COM
1	30.5	0.25098	COM
1	30.54	0.247351	COM
1	30.58	0.243931	COM
1	30.62	0.240459	COM
1	30.66	0.236424	COM
1	30.7	0.233814	COM
1	30.73	0.231246	COM
1	30.77	0.229055	COM
1	30.81	0.227434	COM
1	30.85	0.224159	COM
1	30.89	0.221853	COM
1	30.93	0.219596	COM
1	30.97	0.218115	COM
1	31.01	0.214157	COM
1	31.05	0.214241	COM
1	31.09	0.213256	COM
1	31.13	0.209801	COM
1	31.17	0.209018	COM
1	31.21	0.20513	COM
1	31.25	0.203804	COM
1	31.29	0.201338	COM
1	31.33	0.200266	COM
1	31.37	0.197473	COM
1	31.4	0.197029	COM
1	31.45	0.194897	COM
1	31.48	0.192896	COM
1	31.53	0.193114	COM
1	31.56	0.190036	COM
1	31.61	0.189901	COM
1	31.65	0.189171	COM
1	31.68	0.184929	COM
1	31.72	0.184681	COM
1	31.77	0.183944	COM
1	31.8	0.181023	COM
1	31.84	0.179805	COM
1	31.88	0.178348	COM
1	31.92	0.177503	COM
1	31.96	0.176105	COM
1	32	0.175057	COM
1	32.04	0.172609	COM
1	32.08	0.171717	COM
1	32.12	0.172162	COM
1	32.16	0.169806	COM
1	32.2	0.169847	COM
1	32.24	0.171276	COM
1	32.28	0.166968	COM
1	32.32	0.165891	COM
1	32.36	0.163898	COM
1	32.4	0.163508	COM
1	32.44	0.161495	COM
1	32.48	0.159813	COM
1	32.52	0.158593	COM
1	32.56	0.158806	COM
1	32.6	0.156945	COM
1	32.64	0.156714	COM
1	32.68	0.153576	COM
1	32.72	0.152886	COM
1	32.76	0.151008	COM
1	32.8	0.150841	COM
1	32.84	0.150559	COM
1	32.87	0.151462	COM
1	32.91	0.152468	COM
1	32.95	0.152331	COM
1	32.99	0.151682	COM
1	33.04	0.15123	COM
1	33.07	0.151804	COM
1	33.11	0.150662	COM
1	33.15	0.151638	COM
1	33.19	0.159093	COM
1	33.23	0.153838	COM
1	33.27	0.152204	COM
1	33.31	0.152677	COM
1	33.35	0.150297	COM
1	33.39	0.151506	COM
1	33.43	0.150233	COM
1	33.47	0.15154	COM
1	33.51	0.150614	COM
1	33.55	0.151821	COM
1	33.59	0.151049	COM
1	33.63	0.150874	COM
1	33.67	0.151158	COM
1	33.7	0.148814	COM
1	33.75	0.150201	COM
1	33.79	0.148115	COM
1	33.83	0.148413	COM
1	33.86	0.147679	COM
1	33.91	0.146176	COM
1	33.95	0.146232	COM
1	33.99	0.146005	COM
1	34.03	0.143314	COM
1	34.06	0.142442	COM
1	34.1	0.147001	COM
1	34.14	0.144957	COM
1	34.18	0.145116	COM
1	34.22	0.143159	COM
1	34.26	0.143948	COM
1	34.3	0.143267	COM
1	34.34	0.14272	COM
1	34.38	0.143212	COM
1	34.42	0.14139	COM
1	34.46	0.140189	COM
1	34.5	0.142228	COM
1	34.54	0.139681	COM
1	34.58	0.140133	COM
1	34.62	0.139222	COM
1	34.66	0.137878	COM
1	34.7	0.136545	COM
1	34.74	0.136676	COM
1	34.78	0.136119	COM
1	34.82	0.134775	COM
1	34.86	0.134832	COM
1	34.89	0.133035	COM
1	34.93	0.132326	COM
1	34.98	0.133684	COM
1	35.01	0.132052	COM
1	35.06	0.131964	COM
1	35.1	0.131587	COM
1	35.14	0.129802	COM
1	35.18	0.13108	COM
1	35.22	0.130133	COM
1	35.26	0.129815	COM
1	35.29	0.129684	COM
1	35.33	0.129341	COM
1	35.37	0.128798	COM
1	35.41	0.128293	COM
1	35.45	0.128068	COM
1	35.49	0.127475	COM
1	35.53	0.127369	COM
1	35.57	0.126864	COM
2	35.61	0.127095	COM
2	35.65	0.12676	COM
2	35.69	0.125049	COM
2	35.73	0.125806	COM
2	35.77	0.126617	COM
2	35.81	0.127591	COM
2	35.85	0.125996	COM
2	35.89	0.127536	COM
2	35.93	0.12772	COM
2	35.97	0.126239	COM
2	36.01	0.127255	COM
2	36.04	0.128733	COM
2	36.08	0.130248	COM
2	36.13	0.129731	COM
2	36.17	0.131022	COM
2	36.2	0.133702	COM
2	36.24	0.134275	COM
2	36.28	0.139129	COM
2	36.32	0.140522	COM
2	36.37	0.143156	COM
2	36.41	0.14519	COM
2	36.44	0.150782	COM
2	36.48	0.164545	COM
2	36.52	0.15437	COM
2	36.56	0.158455	COM
2	36.6	0.161169	COM
2	36.64	0.165542	COM
2	36.68	0.168001	COM
2	36.72	0.170806	COM
2	36.76	0.172266	COM
2	36.8	0.17794	COM
2	36.84	0.18264	COM
2	36.88	0.183882	COM
2	36.92	0.188358	COM
2	36.96	0.190802	COM
2	37	0.194169	COM
2	37.04	0.199275	COM
2	37.08	0.202431	COM
2	37.12	0.20538	COM
2	37.16	0.211407	COM
2	37.2	0.211536	COM
2	37.24	0.21156	COM
2	37.28	0.215297	COM
2	37.32	0.219708	COM
2	37.36	0.21955	COM
2	37.4	0.220652	COM
2	37.43	0.226307	COM
2	37.47	0.22476	COM
2	37.51	0.223081	COM
2	37.55	0.223232	COM
2	37.59	0.224936	COM
2	37.63	0.225415	COM
2	37.67	0.223791	COM
2	37.71	0.22267	COM
2	37.75	0.221779	COM
2	37.79	0.220786	COM
2	37.83	0.219281	COM
2	37.87	0.216734	COM
2	37.91	0.213619	COM
2	37.95	0.210549	COM
2	37.99	0.209744	COM
2	38.03	0.219086	COM
2	38.07	0.203426	COM
2	38.11	0.200049	COM
2	38.15	0.196767	COM
2	38.19	0.200843	COM
2	38.23	0.191841	COM
2	38.27	0.188811	COM
2	38.31	0.186731	COM
2	38.35	0.183711	COM
2	38.39	0.180454	COM
2	38.42	0.180088	COM
2	38.46	0.175505	COM
2	38.51	0.173548	COM
2	38.54	0.171467	COM
2	38.59	0.179108	COM
2	38.62	0.169734	COM
2	38.67	0.163579	COM
2	38.71	0.162369	COM
2	38.74	0.161682	COM
2	38.79	0.160449	COM
2	38.82	0.158094	COM
2	38.86	0.155963	COM
2	38.9	0.155427	COM
2	38.94	0.154854	COM
2	38.98	0.151628	COM
2	39.02	0.150779	COM
2	39.06	0.150749	COM
2	39.1	0.149701	COM
2	39.14	0.149567	COM
2	39.18	0.149307	COM
2	39.22	0.146921	COM
2	39.26	0.147301	COM
2	39.3	0.145725	COM
2	39.34	0.145871	COM
2	39.38	0.145972	COM
2	39.42	0.145172	COM
2	39.46	0.145034	COM
2	39.5	0.144922	COM
2	39.54	0.144507	COM
2	39.58	0.143886	COM
2	39.62	0.142424	COM
2	39.65	0.142258	COM
2	39.7	0.143054	COM
2	39.73	0.140755	COM
2	39.77	0.140645	COM
2	39.81	0.139154	COM
2	39.85	0.137696	COM
2	39.89	0.137107	COM
2	39.94	0.139234	COM
2	39.97	0.138412	COM
2	40.01	0.135762	COM
2	40.05	0.135107	COM
2	40.09	0.140363	COM
2	40.13	0.134253	COM
2	40.17	0.132504	COM
2	40.21	0.132755	COM
2	40.25	0.137568	COM
2	40.29	0.133663	COM
2	40.33	0.130479	COM
2	40.37	0.130802	COM
2	40.41	0.129474	COM
2	40.45	0.127462	COM
2	40.49	0.126485	COM
2	40.53	0.125567	COM
2	40.57	0.124852	COM
2	40.61	0.124119	COM
2	40.65	0.123981	COM
2	40.69	0.124843	COM
2	40.73	0.122697	COM
2	40.76	0.121968	COM
2	40.8	0.121997	COM
2	40.85	0.11945	COM
2	40.88	0.120323	COM
2	40.92	0.122442	COM
2	40.96	0.123501	COM
2	41	0.118547	COM
2	41.05	0.118009	COM
2	41.08	0.117052	COM
2	41.12	0.116755	COM
2	41.16	0.116306	COM
2	41.2	0.115777	COM
2	41.24	0.114808	COM
2	41.28	0.114644	COM
2	41.32	0.114879	COM
2	41.36	0.114462	COM
2	41.4	0.113229	COM
2	41.44	0.112281	COM
2	41.48	0.111688	COM
2	41.52	0.111023	COM
2	41.56	0.110643	COM
2	41.6	0.111135	COM
2	41.64	0.109184	COM
2	41.68	0.110927	COM
2	41.72	0.128897	COM
2	41.76	0.110052	COM
2	41.8	0.12866	COM
2	41.84	0.11136	COM
2	41.88	0.114828	COM
2	41.92	0.108815	COM
2	41.96	0.10841	COM
2	41.99	0.108521	COM
2	42.04	0.105781	COM
2	42.07	0.106408	COM
2	42.11	0.108622	COM
2	42.16	0.107233	COM
2	42.2	0.109534	COM
2	42.23	0.105993	COM
2	42.27	0.106462	COM
2	42.31	0.121501	COM
2	42.35	0.111334	COM
2	42.39	0.110146	COM
2	42.43	0.106344	COM
2	42.47	0.105547	COM
2	42.51	0.106893	COM
2	42.55	0.106803	COM
2	42.59	0.107426	COM
2	42.63	0.108287	COM
2	42.67	0.108357	COM
2	42.71	0.108164	COM
3	42.75	0.108281	COM
3	42.79	0.109302	COM
3	42.83	0.109702	COM
3	42.87	0.110425	COM
3	42.91	0.111925	COM
3	42.95	0.113647	COM
3	42.98	0.114482	COM
3	43.02	0.11859	COM
3	43.07	0.118664	COM
3	43.1	0.121574	COM
3	43.14	0.124141	COM
3	43.19	0.125875	COM
3	43.23	0.128076	COM
3	43.26	0.129332	COM
3	43.31	0.131877	COM
3	43.34	0.134577	COM
3	43.38	0.137167	COM
3	43.42	0.139572	COM
3	43.46	0.142427	COM
3	43.5	0.147439	COM
3	43.54	0.162381	COM
3	43.58	0.154395	COM
3	43.62	0.159491	COM
3	43.66	0.160121	COM
3	43.7	0.161631	COM
3	43.74	0.164788	COM
3	43.78	0.166684	COM
3	43.82	0.168564	COM
3	43.86	0.172976	COM
3	43.9	0.176456	COM
3	43.94	0.176914	COM
3	43.98	0.176979	COM
3	44.02	0.199203	COM
3	44.06	0.181905	COM
3	44.1	0.184204	COM
3	44.14	0.210815	COM
3	44.18	0.189103	COM
3	44.22	0.19296	COM
3	44.26	0.190427	COM
3	44.3	0.186443	COM
3	44.33	0.186162	COM
3	44.37	0.189111	COM
3	44.41	0.18493	COM
3	44.45	0.184519	COM
3	44.49	0.183041	COM
3	44.53	0.182382	COM
3	44.58	0.180451	COM
3	44.61	0.179251	COM
3	44.65	0.176962	COM
3	44.69	0.176685	COM
3	44.73	0.17507	COM
3	44.77	0.174376	COM
3	44.81	0.170992	COM
3	44.85	0.168055	COM
3	44.89	0.167573	COM
3	44.93	0.165243	COM
3	44.97	0.164886	COM
3	45.01	0.162467	COM
3	45.05	0.159348	COM
3	45.09	0.158351	COM
3	45.13	0.167977	COM
3	45.17	0.154771	COM
3	45.21	0.151917	COM
3	45.25	0.149051	COM
3	45.29	0.148448	COM
3	45.33	0.148001	COM
3	45.36	0.144741	COM
3	45.41	0.144514	COM
3	45.44	0.141739	COM
3	45.48	0.140983	COM
3	45.52	0.15232	COM
3	45.56	0.144475	COM
3	45.61	0.138518	COM
3	45.65	0.137037	COM
3	45.69	0.13461	COM
3	45.72	0.134058	COM
3	45.76	0.13309	COM
3	45.81	0.137418	COM
3	45.84	0.136916	COM
3	45.88	0.142279	COM
3	45.92	0.134751	COM
3	45.96	0.128088	COM
3	46	0.127291	COM
3	46.04	0.126813	COM
3	46.08	0.126244	COM
3	46.12	0.125664	COM
3	46.16	0.123534	COM
3	46.2	0.123198	COM
3	46.24	0.122794	COM
3	46.28	0.121167	COM
3	46.32	0.121541	COM
3	46.36	0.120319	COM
3	46.4	0.120432	COM
3	46.44	0.119078	COM
3	46.47	0.118372	COM
3	46.52	0.119629	COM
3	46.55	0.116314	COM
3	46.59	0.115858	COM
3	46.63	0.114444	COM
3	46.68	0.113854	COM
3	46.72	0.11349	COM
3	46.75	0.111239	COM
3	46.8	0.111122	COM
3	46.84	0.110239	COM
3	46.87	0.109816	COM
3	46.91	0.109551	COM
3	46.95	0.108653	COM
3	46.99	0.109288	COM
3	47.03	0.10686	COM
3	47.07	0.106325	COM
3	47.11	0.105741	COM
3	47.15	0.109573	COM
3	47.19	0.104641	COM
3	47.23	0.105758	COM
3	47.27	0.104233	COM
3	47.31	0.106466	COM
3	47.35	0.103261	COM
3	47.39	0.103416	COM
3	47.43	0.103924	COM
3	47.47	0.102439	COM
3	47.51	0.102779	COM
3	47.55	0.103136	COM
3	47.59	0.102262	COM
3	47.62	0.102626	COM
3	47.67	0.102094	COM
3	47.7	0.102491	COM
3	47.74	0.101997	COM
3	47.79	0.101027	COM
3	47.83	0.101155	COM
3	47.87	0.102373	COM
3	47.91	0.104369	COM
3	47.94	0.104072	COM
3	47.99	0.112065	COM
3	48.03	0.104401	COM
3	48.06	0.103596	COM
3	48.1	0.102327	COM
3	48.14	0.104131	COM
3	48.18	0.10543	COM
3	48.22	0.105975	COM
3	48.26	0.106021	COM
3	48.3	0.107458	COM
3	48.34	0.108515	COM
3	48.38	0.109906	COM
3	48.42	0.112285	COM
3	48.46	0.114855	COM
3	48.5	0.115474	COM
3	48.54	0.11713	COM
3	48.58	0.119008	COM
3	48.62	0.120362	COM
3	48.66	0.123708	COM
3	48.7	0.125487	COM
3	48.74	0.127337	COM
3	48.78	0.129696	COM
3	48.82	0.131673	COM
3	48.85	0.134928	COM
3	48.9	0.137341	COM
3	48.94	0.140183	COM
3	48.97	0.143745	COM
3	49.01	0.145028	COM
3	49.05	0.14639	COM
3	49.09	0.149298	COM
3	49.13	0.150708	COM
3	49.17	0.152856	COM
3	49.21	0.155218	COM
3	49.25	0.157729	COM
3	49.29	0.157685	COM
3	49.33	0.160173	COM
3	49.37	0.161148	COM
3	49.41	0.162798	COM
3	49.45	0.164254	COM
3	49.49	0.164652	COM
3	49.53	0.165734	COM
3	49.57	0.165614	COM
3	49.61	0.165392	COM
3	49.65	0.16697	COM
3	49.69	0.166194	COM
3	49.73	0.166103	COM
3	49.77	0.16709	COM
3	49.81	0.164502	COM
4	49.85	0.162763	COM
4	49.89	0.161406	COM
4	49.93	0.159928	COM
4	49.97	0.159395	COM
4	50.01	0.159451	COM
4	50.05	0.158238	COM
4	50.09	0.156264	COM
4	50.12	0.154659	COM
4	50.16	0.153441	COM
4	50.21	0.151024	COM
4	50.24	0.148535	COM
4	50.28	0.151975	COM
4	50.32	0.145683	COM
4	50.36	0.144352	COM
4	50.4	0.142233	COM
4	50.44	0.141426	COM
4	50.48	0.142918	COM
4	50.52	0.141075	COM
4	50.56	0.138479	COM
4	50.6	0.136676	COM
4	50.64	0.134621	COM
4	50.68	0.132664	COM
4	50.72	0.131046	COM
4	50.76	0.130018	COM
4	50.8	0.128647	COM
4	50.84	0.128172	COM
4	50.88	0.126805	COM
4	50.92	0.125497	COM
4	50.96	0.123727	COM
4	51	0.122952	COM
4	51.04	0.120907	COM
4	51.08	0.118715	COM
4	51.12	0.118251	COM
4	51.16	0.121372	COM
4	51.2	0.118212	COM
4	51.24	0.118822	COM
4	51.28	0.11625	COM
4	51.31	0.114387	COM
4	51.36	0.11133	COM
4	51.4	0.109986	COM
4	51.44	0.109431	COM
4	51.47	0.109457	COM
4	51.51	0.107427	COM
4	51.55	0.109181	COM
4	51.59	0.106352	COM
4	51.63	0.106231	COM
4	51.67	0.103291	COM
4	51.71	0.10461	COM
4	51.75	0.104186	COM
4	51.79	0.10368	COM
4	51.83	0.112752	COM
4	51.87	0.103953	COM
4	51.91	0.103402	COM
4	51.95	0.107197	COM
4	51.99	0.103229	COM
4	52.03	0.10395	COM
4	52.07	0.10672	COM
4	52.11	0.104323	COM
4	52.15	0.10508	COM
4	52.18	0.104789	COM
4	52.23	0.10679	COM
4	52.27	0.10764	COM
4	52.31	0.107793	COM
4	52.35	0.109786	COM
4	52.39	0.109587	COM
4	52.43	0.113321	COM
4	52.47	0.111429	COM
4	52.5	0.113816	COM
4	52.54	0.115914	COM
4	52.58	0.115858	COM
4	52.62	0.118778	COM
4	52.66	0.117487	COM
4	52.7	0.119914	COM
4	52.74	0.123251	COM
4	52.78	0.125492	COM
4	52.82	0.125933	COM
4	52.86	0.126254	COM
4	52.9	0.132166	COM
4	52.94	0.129846	COM
4	52.98	0.132942	COM
4	53.02	0.137717	COM
4	53.06	0.140133	COM
4	53.1	0.146846	COM
4	53.14	0.14505	COM
4	53.18	0.144306	COM
4	53.22	0.146052	COM
4	53.26	0.150387	COM
4	53.3	0.149573	COM
4	53.34	0.149168	COM
4	53.38	0.150978	COM
4	53.42	0.152408	COM
4	53.46	0.152946	COM
4	53.49	0.152149	COM
4	53.53	0.151154	COM
4	53.57	0.152115	COM
4	53.62	0.152167	COM
4	53.65	0.150602	COM
4	53.69	0.151444	COM
4	53.73	0.1488	COM
4	53.77	0.149786	COM
4	53.81	0.147983	COM
4	53.85	0.147516	COM
4	53.89	0.144278	COM
4	53.93	0.143413	COM
4	53.97	0.143032	COM
4	54.01	0.142273	COM
4	54.05	0.143144	COM
4	54.09	0.14071	COM
4	54.13	0.13778	COM
4	54.17	0.137364	COM
4	54.21	0.135374	COM
4	54.25	0.135608	COM
4	54.29	0.13428	COM
4	54.33	0.131943	COM
4	54.37	0.130994	COM
4	54.41	0.129013	COM
4	54.45	0.130493	COM
4	54.49	0.128187	COM
4	54.53	0.125101	COM
4	54.57	0.124849	COM
4	54.61	0.125327	COM
4	54.65	0.123269	COM
4	54.68	0.123745	COM
4	54.73	0.121552	COM
4	54.76	0.121927	COM
4	54.8	0.120017	COM
4	54.84	0.118967	COM
4	54.88	0.127293	COM
4	54.93	0.124523	COM
4	54.96	0.115723	COM
4	55	0.119327	COM
4	55.04	0.116177	COM
4	55.08	0.117282	COM
4	55.12	0.115959	COM
4	55.16	0.114433	COM
4	55.2	0.115021	COM
4	55.24	0.114771	COM
4	55.28	0.115475	COM
4	55.32	0.115086	COM
4	55.36	0.116301	COM
4	55.4	0.116564	COM
4	55.44	0.117164	COM
4	55.48	0.119917	COM
4	55.52	0.118024	COM
4	55.56	0.119458	COM
4	55.6	0.120984	COM
4	55.64	0.121078	COM
4	55.68	0.123332	COM
4	55.72	0.125646	COM
4	55.76	0.125546	COM
4	55.8	0.127955	COM
4	55.84	0.127476	COM
4	55.87	0.13267	COM
4	55.91	0.132488	COM
4	55.95	0.131277	COM
4	55.99	0.133967	COM
4	56.03	0.134199	COM
4	56.07	0.136052	COM
4	56.12	0.137211	COM
4	56.16	0.137266	COM
4	56.19	0.140144	COM
4	56.23	0.138255	COM
4	56.27	0.1403	COM
4	56.31	0.140183	COM
4	56.35	0.143964	COM
4	56.39	0.142375	COM
4	56.43	0.14215	COM
4	56.47	0.14165	COM
4	56.51	0.142914	COM
4	56.55	0.141902	COM
4	56.59	0.141679	COM
4	56.63	0.140228	COM
4	56.67	0.139027	COM
4	56.71	0.137919	COM
4	56.75	0.140176	COM
4	56.79	0.137475	COM
4	56.83	0.135905	COM
4	56.87	0.136835	COM
4	56.91	0.134371	COM
4	56.95	0.133644	COM
5	56.99	0.132881	COM
5	57.02	0.130291	COM
5	57.06	0.132705	COM
5	57.1	0.130988	COM
5	57.14	0.129367	COM
5	57.18	0.129481	COM
5	57.22	0.127896	COM
5	57.26	0.126075	COM
5	57.3	0.12588	COM
5	57.34	0.125917	COM
5	57.38	0.125014	COM
5	57.42	0.124952	COM
5	57.46	0.125141	COM
5	57.5	0.124483	COM
5	57.54	0.124564	COM
5	57.58	0.123359	COM
5	57.62	0.122864	COM
5	57.66	0.123733	COM
5	57.7	0.123647	COM
5	57.74	0.122864	COM
5	57.78	0.122829	COM
5	57.82	0.124183	COM
5	57.86	0.124176	COM
5	57.9	0.12533	COM
5	57.94	0.124711	COM
5	57.98	0.125017	COM
5	58.02	0.1269	COM
5	58.06	0.127156	COM
5	58.1	0.127608	COM
5	58.14	0.131341	COM
5	58.18	0.132234	COM
5	58.22	0.134632	COM
5	58.26	0.130858	COM
5	58.29	0.133442	COM
5	58.34	0.133041	COM
5	58.37	0.13584	COM
5	58.41	0.134211	COM
5	58.45	0.135151	COM
5	58.49	0.134341	COM
5	58.53	0.133353	COM
5	58.57	0.133049	COM
5	58.61	0.136256	COM
5	58.65	0.137257	COM
5	58.69	0.136418	COM
5	58.73	0.136785	COM
5	58.77	0.137178	COM
5	58.81	0.136486	COM
5	58.85	0.136573	COM
5	58.89	0.135721	COM
5	58.93	0.135609	COM
5	58.97	0.135748	COM
5	59.01	0.13321	COM
5	59.05	0.13422	COM
5	59.09	0.134636	COM
5	59.13	0.133318	COM
5	59.17	0.132061	COM
5	59.2	0.13162	COM
5	59.24	0.129924	COM
5	59.29	0.130379	COM
5	59.33	0.129552	COM
5	59.36	0.128863	COM
5	59.41	0.127955	COM
5	59.45	0.128398	COM
5	59.48	0.127305	COM
5	59.52	0.127945	COM
5	59.57	0.128165	COM
5	59.61	0.126783	COM
5	59.64	0.129702	COM
5	59.68	0.12692	COM
5	59.72	0.127808	COM
5	59.76	0.127356	COM
5	59.8	0.126994	COM
5	59.84	0.124866	COM
5	59.88	0.12559	COM
5	59.92	0.125748	COM
5	59.96	0.126697	COM
5	60	0.126174	COM
5	60.04	0.126174	COM
5	60.08	0.126201	COM
5	60.12	0.127599	COM
5	60.16	0.128432	COM
5	60.2	0.12883	COM
5	60.24	0.128027	COM
5	60.28	0.128426	COM
5	60.32	0.127736	COM
5	60.36	0.129032	COM
5	60.39	0.130185	COM
5	60.43	0.128349	COM
5	60.47	0.128479	COM
5	60.51	0.128222	COM
5	60.55	0.128494	COM
5	60.59	0.128391	COM
5	60.63	0.128698	COM
5	60.67	0.128626	COM
5	60.71	0.128701	COM
5	60.75	0.127667	COM
5	60.79	0.126656	COM
5	60.83	0.126481	COM
5	60.87	0.127073	COM
5	60.91	0.128051	COM
5	60.95	0.13127	COM
5	60.99	0.127327	COM
5	61.03	0.125819	COM
5	61.07	0.125949	COM
5	61.11	0.125418	COM
5	61.15	0.124369	COM
5	61.19	0.123797	COM
5	61.23	0.124329	COM
5	61.27	0.124402	COM
5	61.31	0.123999	COM
5	61.35	0.123004	COM
5	61.39	0.124853	COM
5	61.43	0.125009	COM
5	61.47	0.125965	COM
5	61.51	0.126487	COM
5	61.55	0.126888	COM
5	61.59	0.127022	COM
5	61.63	0.126231	COM
5	61.66	0.126764	COM
5	61.71	0.126436	COM
5	61.74	0.126538	COM
5	61.78	0.127521	COM
5	61.82	0.126386	COM
5	61.86	0.12713	COM
5	61.9	0.125744	COM
5	61.94	0.12685	COM
5	61.98	0.12597	COM
5	62.02	0.126308	COM
5	62.06	0.124911	COM
5	62.1	0.126481	COM
5	62.14	0.127934	COM
5	62.18	0.12403	COM
5	62.22	0.125091	COM
5	62.26	0.125507	COM
5	62.3	0.124303	COM
5	62.34	0.123769	COM
5	62.38	0.125448	COM
5	62.42	0.126462	COM
5	62.46	0.123276	COM
5	62.5	0.121129	COM
5	62.54	0.122284	COM
5	62.58	0.122334	COM
5	62.62	0.12183	COM
5	62.66	0.121097	COM
5	62.7	0.121609	COM
5	62.74	0.121682	COM
5	62.77	0.120791	COM
5	62.82	0.122106	COM
5	62.85	0.119658	COM
5	62.89	0.120627	COM
5	62.93	0.119973	COM
5	62.97	0.120023	COM
5	63.01	0.121612	COM
5	63.05	0.119873	COM
5	63.09	0.120917	COM
5	63.13	0.121937	COM
5	63.17	0.120589	COM
5	63.21	0.120331	COM
5	63.25	0.120403	COM
5	63.29	0.118841	COM
5	63.33	0.11955	COM
5	63.37	0.119209	COM
5	63.41	0.118613	COM
5	63.45	0.118655	COM
5	63.49	0.117228	COM
5	63.53	0.118382	COM
5	63.57	0.118303	COM
5	63.61	0.118052	COM
5	63.65	0.117399	COM
5	63.69	0.118583	COM
5	63.73	0.117747	COM
5	63.77	0.119666	COM
5	63.81	0.11804	COM
5	63.84	0.11703	COM
5	63.89	0.116767	COM
5	63.93	0.115631	COM
5	63.96	0.115055	COM
5	64.01	0.114948	COM
5	64.04	0.115686	COM
6	64.09	0.115868	COM
6	64.13	0.115515	COM
6	64.17	0.114155	COM
6	64.21	0.114103	COM
6	64.24	0.114632	COM
6	64.28	0.114265	COM
6	64.32	0.114382	COM
6	64.36	0.114942	COM
6	64.4	0.113594	COM
6	64.44	0.114027	COM
6	64.48	0.114576	COM
6	64.52	0.114448	COM
6	64.56	0.112811	COM
6	64.6	0.114187	COM
6	64.64	0.113267	COM
6	64.68	0.113048	COM
6	64.72	0.113305	COM
6	64.76	0.115324	COM
6	64.8	0.114176	COM
6	64.84	0.112446	COM
6	64.88	0.113311	COM
6	64.92	0.112484	COM
6	64.96	0.113046	COM
6	65	0.111779	COM
6	65.03	0.110351	COM
6	65.07	0.109923	COM
6	65.11	0.111208	COM
6	65.15	0.111141	COM
6	65.19	0.110182	COM
6	65.23	0.109222	COM
6	65.27	0.110427	COM
6	65.31	0.109569	COM
6	65.35	0.109016	COM
6	65.4	0.10848	COM
6	65.43	0.109545	COM
6	65.47	0.10846	COM
6	65.51	0.10767	COM
6	65.55	0.107521	COM
6	65.59	0.10723	COM
6	65.63	0.107401	COM
6	65.67	0.108593	COM
6	65.71	0.108336	COM
6	65.75	0.107163	COM
6	65.79	0.106787	COM
6	65.83	0.10642	COM
6	65.87	0.106357	COM
6	65.91	0.105548	COM
6	65.95	0.10584	COM
6	65.99	0.105315	COM
6	66.03	0.105981	COM
6	66.07	0.104595	COM
6	66.11	0.105344	COM
6	66.14	0.10873	COM
6	66.18	0.105998	COM
6	66.22	0.104928	COM
6	66.26	0.105193	COM
6	66.31	0.104109	COM
6	66.34	0.102699	COM
6	66.39	0.101682	COM
6	66.43	0.102141	COM
6	66.47	0.10223	COM
6	66.51	0.104037	COM
6	66.54	0.103699	COM
6	66.58	0.103017	COM
6	66.62	0.10228	COM
6	66.66	0.102778	COM
6	66.7	0.101833	COM
6	66.74	0.102427	COM
6	66.78	0.100655	COM
6	66.82	0.100313	COM
6	66.86	0.102454	COM
6	66.9	0.101444	COM
6	66.94	0.10147	COM
6	66.98	0.10178	COM
6	67.02	0.104666	COM
6	67.06	0.101308	COM
6	67.1	0.101954	COM
6	67.14	0.099334	COM
6	67.18	0.099496	COM
6	67.22	0.098628	COM
6	67.26	0.100908	COM
6	67.3	0.099605	COM
6	67.34	0.099279	COM
6	67.38	0.099198	COM
6	67.42	0.100216	COM
6	67.46	0.099182	COM
6	67.5	0.097491	COM
6	67.54	0.097461	COM
6	67.57	0.098416	COM
6	67.62	0.097002	COM
6	67.66	0.096908	COM
6	67.69	0.096297	COM
6	67.73	0.096829	COM
6	67.77	0.096475	COM
6	67.81	0.096883	COM
6	67.85	0.094759	COM
6	67.89	0.094294	COM
6	67.93	0.094603	COM
6	67.97	0.094212	COM
6	68.01	0.093579	COM
6	68.05	0.093026	COM
6	68.09	0.094206	COM
6	68.13	0.091321	COM
6	68.17	0.09211	COM
6	68.21	0.09105	COM
6	68.25	0.092443	COM
6	68.29	0.091851	COM
6	68.33	0.092152	COM
6	68.37	0.091073	COM
6	68.4	0.089983	COM
6	68.45	0.091937	COM
6	68.49	0.089737	COM
6	68.53	0.088822	COM
6	68.56	0.089015	COM
6	68.6	0.090093	COM
6	68.65	0.091141	COM
6	68.69	0.08968	COM
6	68.72	0.089652	COM
6	68.76	0.086647	COM
6	68.8	0.087592	COM
6	68.84	0.08934	COM
6	68.88	0.090587	COM
6	68.92	0.087908	COM
6	68.96	0.088006	COM
6	69	0.088523	COM
6	69.04	0.087362	COM
6	69.08	0.087476	COM
6	69.12	0.086115	COM
6	69.16	0.086697	COM
6	69.2	0.085081	COM
6	69.24	0.085859	COM
6	69.28	0.087431	COM
6	69.32	0.086826	COM
6	69.36	0.085776	COM
6	69.4	0.085223	COM
6	69.44	0.085227	COM
6	69.48	0.084495	COM
6	69.52	0.086268	COM
6	69.56	0.084626	COM
6	69.6	0.084571	COM
6	69.63	0.084476	COM
6	69.67	0.084127	COM
6	69.71	0.084527	COM
6	69.76	0.082912	COM
6	69.79	0.082916	COM
6	69.83	0.084391	COM
6	69.88	0.082668	COM
6	69.91	0.083772	COM
6	69.96	0.082759	COM
6	69.99	0.082638	COM
6	70.03	0.081616	COM
6	70.07	0.083212	COM
6	70.11	0.082095	COM
6	70.15	0.081917	COM
6	70.19	0.08415	COM
6	70.23	0.083122	COM
6	70.27	0.081068	COM
6	70.31	0.082475	COM
6	70.35	0.082567	COM
6	70.39	0.082995	COM
6	70.43	0.083391	COM
6	70.47	0.082159	COM
6	70.51	0.080234	COM
6	70.55	0.080807	COM
6	70.59	0.080879	COM
6	70.63	0.080838	COM
6	70.67	0.081172	COM
6	70.71	0.080957	COM
6	70.75	0.081769	COM
6	70.79	0.080511	COM
6	70.83	0.080774	COM
6	70.86	0.080154	COM
6	70.91	0.080942	COM
6	70.95	0.079072	COM
6	70.99	0.077833	COM
6	71.03	0.078428	COM
6	71.06	0.077551	COM
6	71.1	0.07748	COM
6	71.14	0.076589	COM
6	71.18	0.078291	COM
7	71.22	0.079001	COM
7	71.26	0.077128	COM
7	71.3	0.076991	COM
7	71.34	0.075763	COM
7	71.38	0.075586	COM
7	71.42	0.076249	COM
7	71.46	0.075532	COM
7	71.5	0.076406	COM
7	71.54	0.076716	COM
7	71.58	0.076101	COM
7	71.62	0.07568	COM
7	71.66	0.075638	COM
7	71.7	0.076944	COM
7	71.74	0.075263	COM
7	71.78	0.075883	COM
7	71.82	0.075186	COM
7	71.86	0.073788	COM
7	71.9	0.073789	COM
7	71.94	0.075649	COM
7	71.98	0.074841	COM
7	72.01	0.074594	COM
7	72.05	0.07449	COM
7	72.09	0.074874	COM
7	72.14	0.073415	COM
7	72.17	0.072979	COM
7	72.21	0.072962	COM
7	72.25	0.0731	COM
7	72.29	0.071095	COM
7	72.33	0.072318	COM
7	72.37	0.072705	COM
7	72.41	0.073291	COM
7	72.45	0.073811	COM
7	72.49	0.07371	COM
7	72.53	0.073103	COM
7	72.57	0.072024	COM
7	72.61	0.073191	COM
7	72.65	0.07347	COM
7	72.69	0.072135	COM
7	72.73	0.072837	COM
7	72.77	0.07105	COM
7	72.81	0.071729	COM
7	72.85	0.070986	COM
7	72.89	0.070812	COM
7	72.93	0.071726	COM
7	72.97	0.07122	COM
7	73.01	0.070864	COM
7	73.05	0.069708	COM
7	73.09	0.07065	COM
7	73.13	0.071244	COM
7	73.17	0.070786	COM
7	73.21	0.069491	COM
7	73.25	0.068024	COM
7	73.29	0.067273	COM
7	73.33	0.069642	COM
7	73.37	0.068772	COM
7	73.41	0.069176	COM
7	73.45	0.070176	COM
7	73.49	0.06903	COM
7	73.53	0.070184	COM
7	73.57	0.071528	COM
7	73.61	0.070986	COM
7	73.65	0.072313	COM
7	73.69	0.069563	COM
7	73.73	0.070311	COM
7	73.77	0.070202	COM
7	73.81	0.069154	COM
7	73.85	0.068275	COM
7	73.89	0.070172	COM
7	73.92	0.070065	COM
7	73.96	0.070136	COM
7	74	0.07252	COM
7	74.04	0.069618	COM
7	74.08	0.069521	COM
7	74.12	0.069931	COM
7	74.16	0.069466	COM
7	74.2	0.068987	COM
7	74.24	0.069349	COM
7	74.28	0.069621	COM
7	74.32	0.068558	COM
7	74.36	0.06921	COM
7	74.4	0.06867	COM
7	74.44	0.069975	COM
7	74.48	0.069735	COM
7	74.52	0.067976	COM
7	74.56	0.068324	COM
7	74.6	0.068688	COM
7	74.64	0.068462	COM
7	74.68	0.067196	COM
7	74.72	0.067798	COM
7	74.76	0.067429	COM
7	74.8	0.066817	COM
7	74.84	0.068029	COM
7	74.88	0.068265	COM
7	74.92	0.067226	COM
7	74.96	0.067544	COM
7	75	0.067786	COM
7	75.04	0.067197	COM
7	75.08	0.067891	COM
7	75.11	0.066771	COM
7	75.15	0.06704	COM
7	75.19	0.06867	COM
7	75.23	0.067037	COM
7	75.27	0.068009	COM
7	75.31	0.067346	COM
7	75.35	0.067865	COM
7	75.39	0.067918	COM
7	75.43	0.067263	COM
7	75.47	0.067111	COM
7	75.51	0.066711	COM
7	75.55	0.0661	COM
8	75.59	0.065521	COM
8	75.63	0.066007	COM
8	75.67	0.066463	COM
8	75.71	0.067072	COM
8	75.75	0.065247	COM
8	75.79	0.068756	COM
8	75.83	0.065701	COM
8	75.87	0.066369	COM
8	75.91	0.065628	COM
8	75.95	0.06593	COM
8	75.99	0.067402	COM
8	76.03	0.066822	COM
8	76.07	0.068474	COM
8	76.11	0.066425	COM
8	76.15	0.065758	COM
8	76.19	0.06685	COM
8	76.23	0.066948	COM
8	76.27	0.064993	COM
8	76.31	0.065798	COM
8	76.34	0.06473	COM
8	76.39	0.065337	COM
8	76.42	0.065232	COM
8	76.46	0.063141	COM
8	76.5	0.063862	COM
8	76.54	0.062481	COM
8	76.58	0.063315	COM
8	76.62	0.062657	COM
8	76.66	0.063297	COM
8	76.7	0.065768	COM
8	76.74	0.064278	COM
8	76.78	0.063738	COM
8	76.82	0.063664	COM
8	76.86	0.063529	COM
8	76.9	0.064505	COM
8	76.94	0.064074	COM
8	76.98	0.065206	COM
8	77.02	0.064991	COM
8	77.06	0.063105	COM
8	77.1	0.064281	COM
8	79.2	0.063105	COM
0	0	0.863556	cgb
0	0.04	1.82774	cgb
0	0.07	1.20696	cgb
0	0.11	1.15525	cgb
0	0.15	1.17427	cgb
0	0.19	1.17041	cgb
0	0.23	1.19277	cgb
0	0.27	1.17564	cgb
0	0.31	1.20043	cgb
0	0.35	1.18061	cgb
0	0.39	1.19743	cgb
0	0.43	1.16928	cgb
0	0.47	1.1927	cgb
0	0.51	1.16034	cgb
0	0.55	1.17663	cgb
0	0.59	1.16663	cgb
0	0.63	1.15207	cgb
0	0.67	1.17976	cgb
0	0.71	1.14561	cgb
0	0.75	1.14377	cgb
0	0.79	1.15833	cgb
0	0.83	1.12313	cgb
0	0.87	1.13908	cgb
0	0.9	1.13836	cgb
0	0.94	1.10788	cgb
0	0.98	1.15574	cgb
0	1.02	1.08389	cgb
0	1.06	4.13249	cgb
0	1.1	3.05681	cgb
0	1.14	3.78252	cgb
0	1.18	2.12776	cgb
0	1.22	1.93932	cgb
0	1.26	1.95225	cgb
0	1.3	1.88072	cgb
0	1.34	2.21071	cgb
0	1.38	2.8093	cgb
0	1.42	1.26693	cgb
0	1.46	0.965787	cgb
0	1.5	0.902232	cgb
0	1.54	0.892539	cgb
0	1.58	0.884604	cgb
0	1.62	0.871312	cgb
0	1.66	0.857452	cgb
0	1.7	0.844937	cgb
0	1.74	0.830421	cgb
0	1.78	0.818551	cgb
0	1.82	0.80911	cgb
0	1.86	0.802653	cgb
0	1.9	0.803812	cgb
0	1.94	0.811363	cgb
0	1.98	0.797273	cgb
0	2.02	0.78959	cgb
0	2.06	0.793184	cgb
[truncated: 1,898 more rows]
