# Supplementary material for: The tRNA thiolation-mediated translational control is essential for plant immunity
Source: eLife. 2024 Jan 29;13:e93517. doi: 10.7554/eLife.93517 (PMC10863982; doi:10.7554/eLife.93517)
Supplement: Figure 5—source data 5. [file elife-93517-fig5-data5.xlsx]

## Sheet: 20220910_QPCR
Fraction	mRNA ratio mean	Se	Sample
0	1	0.07992	cgb
1	4.88285	0.42796	cgb
2	3.45312	0.29414	cgb
3	2.89423	0.05938	cgb
4	3.38365	0.18717	cgb
5	6.69498	1.3186	cgb
6	3.66646	0.22738	cgb
7	1.461	0.20726	cgb
0	1	0.03858	COM
1	6.63794	1.01552	COM
2	4.37294	0.32683	COM
3	2.92938	1.05473	COM
4	4.02733	0.46954	COM
5	9.60626	1.31822	COM
6	14.0068	2.11979	COM
7	4.60153	0.50945	COM
