# Supplementary material for: The tRNA thiolation-mediated translational control is essential for plant immunity
Source: eLife journal article supplement (doi:10.7554/elife.93517), 2024-01-29
Supplement: figures [file elife-93517-figures-v2.pdf]

---

## Figures and figure supplements

The tRNA thiolation-mediated translational control is essential for plant immunity

**Xueao Zheng and Hanchen Chen *et al.***

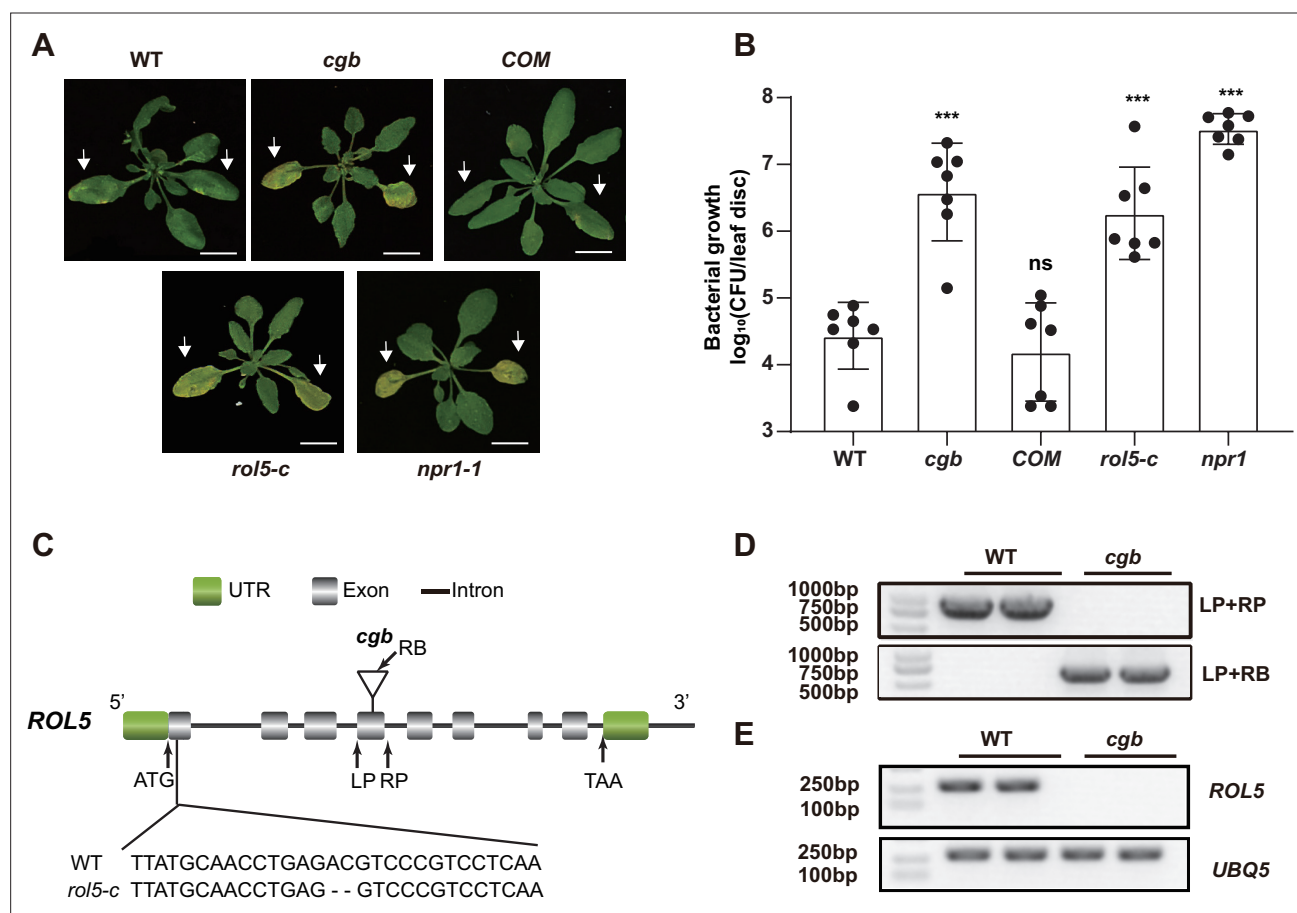

**Figure 1.** The *rol5* mutants are more susceptible to the bacterial pathogen *Psm* ES4326 than wild-type (WT). **(A)** Pictures of *Arabidopsis* 3 days after infection. The arrows indicate the leaves inoculated with *Psm* ES4326 ( $\text{OD}_{600}=0.0002$ ). *cgb* and *rol5-c* are mutants defective in *ROL5*. *COM*, the complementation line of *cgb*. *npr1-1* serves as a positive control. Bar = 1 cm. **(B)** The growth of *Psm* ES4326. CFU, colony-forming unit. Error bars represent 95% confidence intervals ( $n=7$ ). Statistical significance was determined by two-tailed Student's t-test. \*\*\*,  $p<0.001$ ; ns, not significant. **(C)** A schematic diagram showing the site of the T-DNA insertion in *cgb* and the deleted nucleotides in *rol5-c*. **(D)** The genotyping results using the primers indicated in C. **(E)** The transcript of *ROL5* is not detectable in *cgb*. *UBQ5* serves as an internal reference gene.

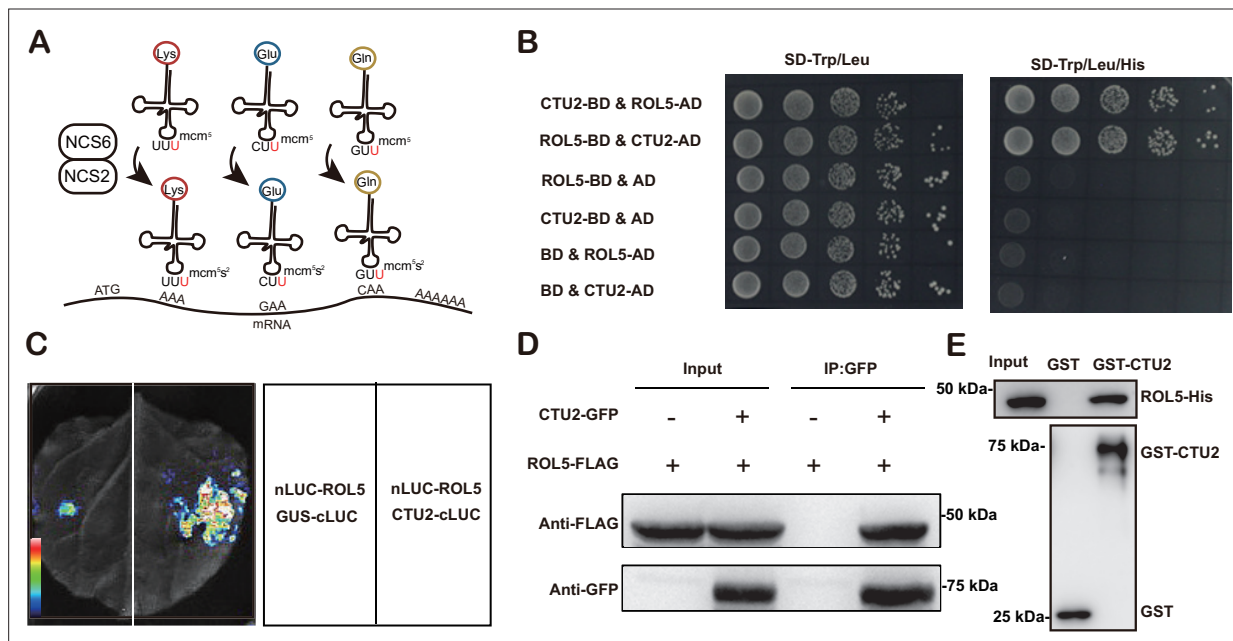

**Figure 2.** ROL5 interacts with CTU2. **(A)** A schematic diagram showing the function of ROL5 and CTU2. The ROL5 homolog NCS6 and the CTU2 homolog NCS2 form a complex to catalyze the mcm<sup>s</sup>U modification at wobble nucleotide of tRNA-Lys (UUU), tRNA-Gln (UUC), and tRNA-Glu (UUG), which pair with the AAA, GAA, and CAA codons in mRNA, respectively. **(B)** Yeast two-hybrid assays. The growth of yeast cells on the SD-Trp/Leu/His medium indicates interaction. BD, binding domain. AD, activation domain. **(C)** Split luciferase assays. The indicated proteins were fused to either the C- or N-terminal half of luciferase (cLUC or nLUC) and were transiently expressed in *N. benthamiana*. The luminescence detected by a CCD camera reports interaction. **(D)** Co-immunoprecipitation (CoIP) assays. CTU2-GFP and/or ROL5-FLAG fusion proteins were expressed in *N. benthamiana*. The protein samples were precipitated by GFP-Trap, followed by western blotting using anti-GFP or anti-FLAG antibodies. **(E)** GST pull-down assays. The recombinant GST or GST-CTU2 proteins coupled with glutathione beads were used to pull down His-ROL5, followed by western blotting using anti-His or anti-GST antibodies.

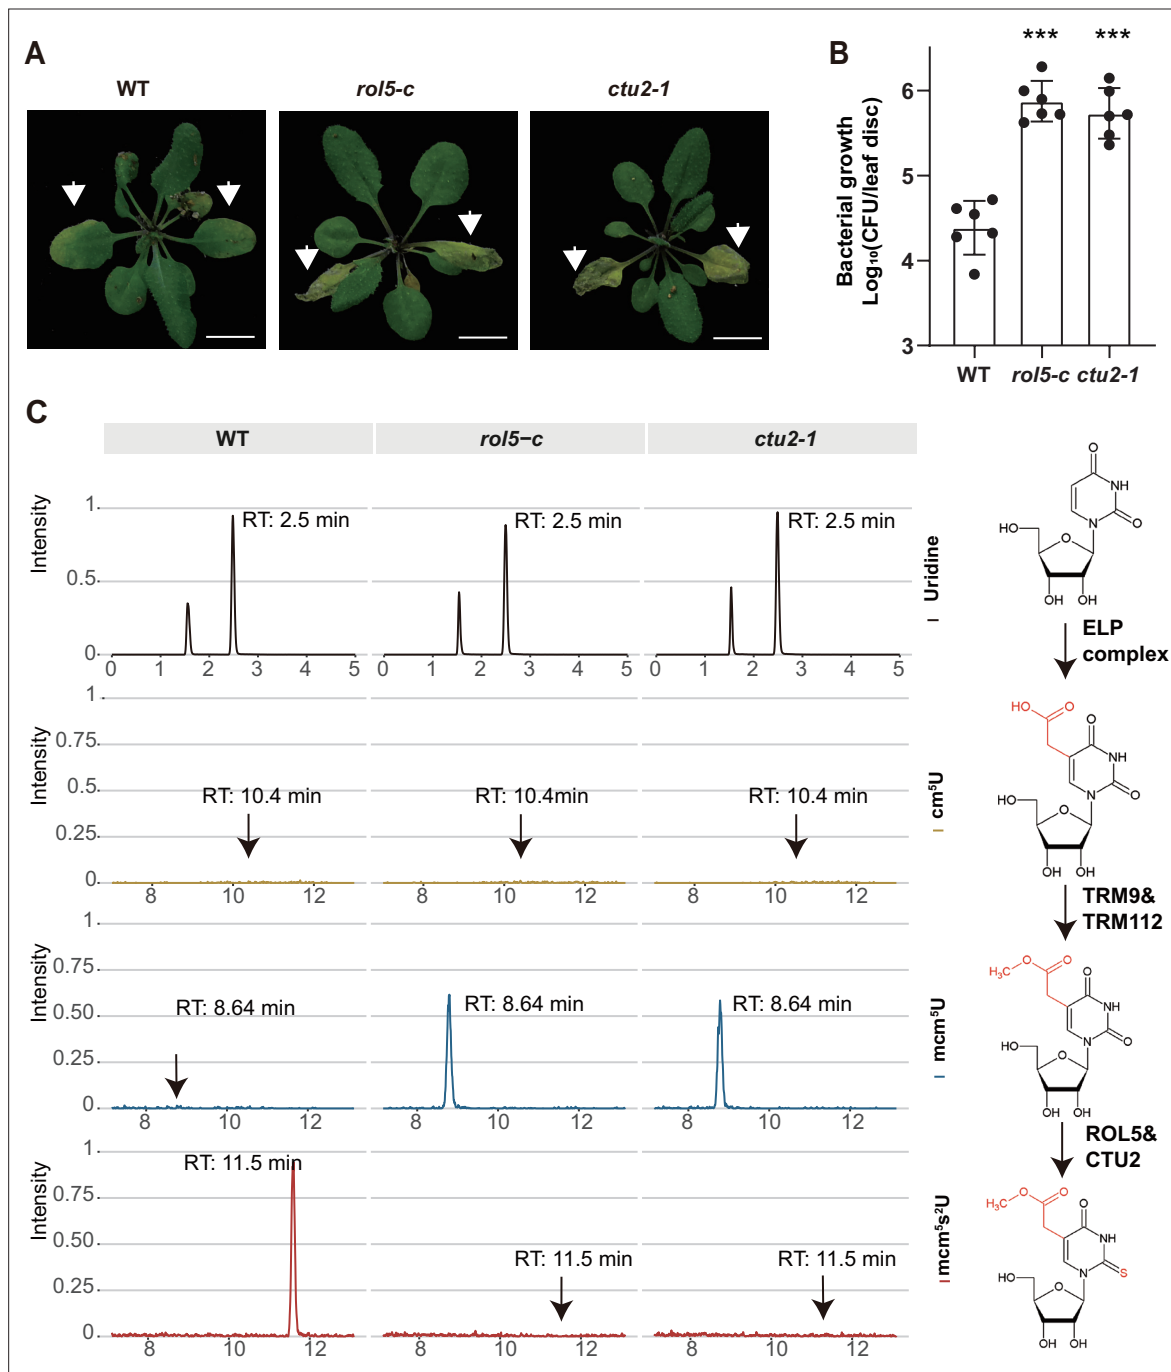

**Figure 3.** ROL5 and CTU2 are required for mcm<sup>5</sup>s<sup>2</sup>U modification and plant immunity. **(A and B)** The *rol5-c* and *ctu2-1* mutants are more susceptible to the bacterial pathogen *Psm* ES4326 than wild-type (WT). **(A)** Pictures of *Arabidopsis* plants 3 days after infection. Arrows indicate the leaves inoculated with *Psm* ES4326. Bar = 1 cm. **(B)** The growth of *Psm* ES4326. CFU, colony-forming unit. Error bars represent 95% confidence intervals (n=6). Statistical significance was determined by two-tailed Student's t-test. \*\*\*, p<0.001. **(C)** The *rol5-c* and *ctu2-1* mutants lack the mcm<sup>5</sup>s<sup>2</sup>U modification. The levels of U, cm<sup>5</sup>U, mcm<sup>5</sup>U, and mcm<sup>5</sup>s<sup>2</sup>U were quantified through high-performance liquid chromatography coupled with mass spectrometry (HPLC-MS) analyses. The intensity and the retention time of each nucleotide are shown. The structure of each nucleotide and the catalyzing enzymes are shown on the right.

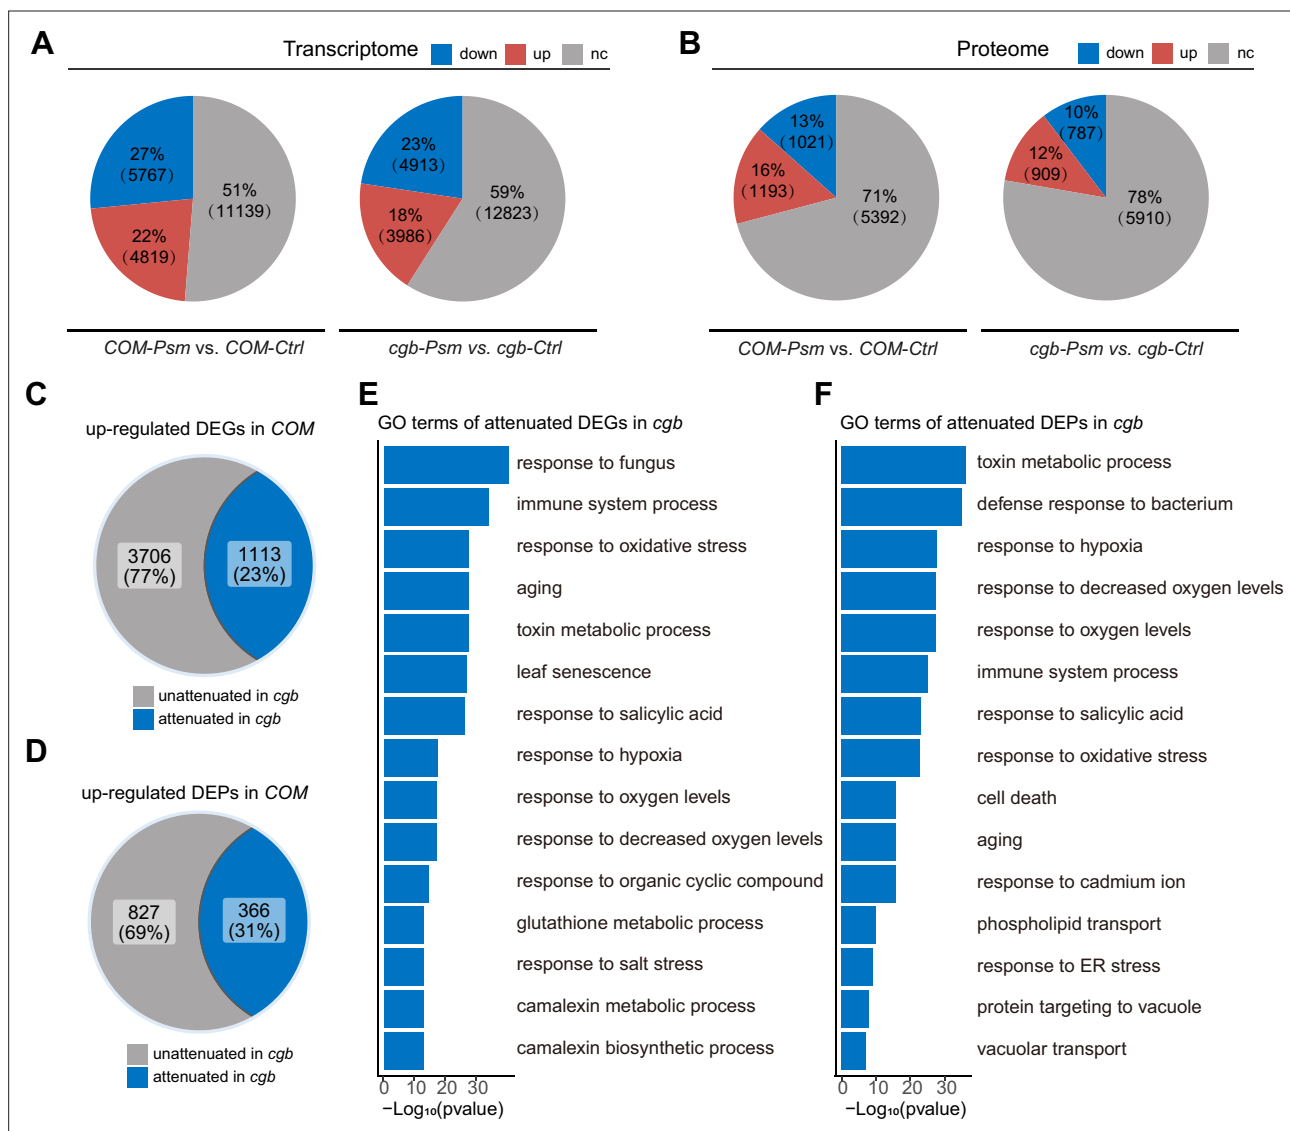

**Figure 4.** The transcriptome and proteome reprogramming are compromised in *cgb*. (**A and B**) The percentage and the number of the differentially expressed genes (DEGs,  $p$ -value  $< 0.05$ ,  $|\text{Log}_2\text{Foldchange}| > \text{Log}_2 1.5$ , (**A**)) and the differentially expressed proteins (DEPs,  $p$ -value  $< 0.05$ ,  $|\text{Log}_2\text{Foldchange}| > \text{Log}_2 1.2$ , (**B**)) after *Psm* infection in the *cgb* mutant and the complementation line (COM). Down, down-regulated. Up, up-regulated. Nc, no change. (**C and D**) The percentage and the number of the attenuated genes (**C**) and proteins (**D**) in *cgb* among the up-regulated DEGs and DEPs in COM. (**E and F**) Gene Ontology (GO) analysis of the attenuated genes (**E**) or proteins (**F**) in *cgb*. The top 15 significantly enriched GO terms are shown.

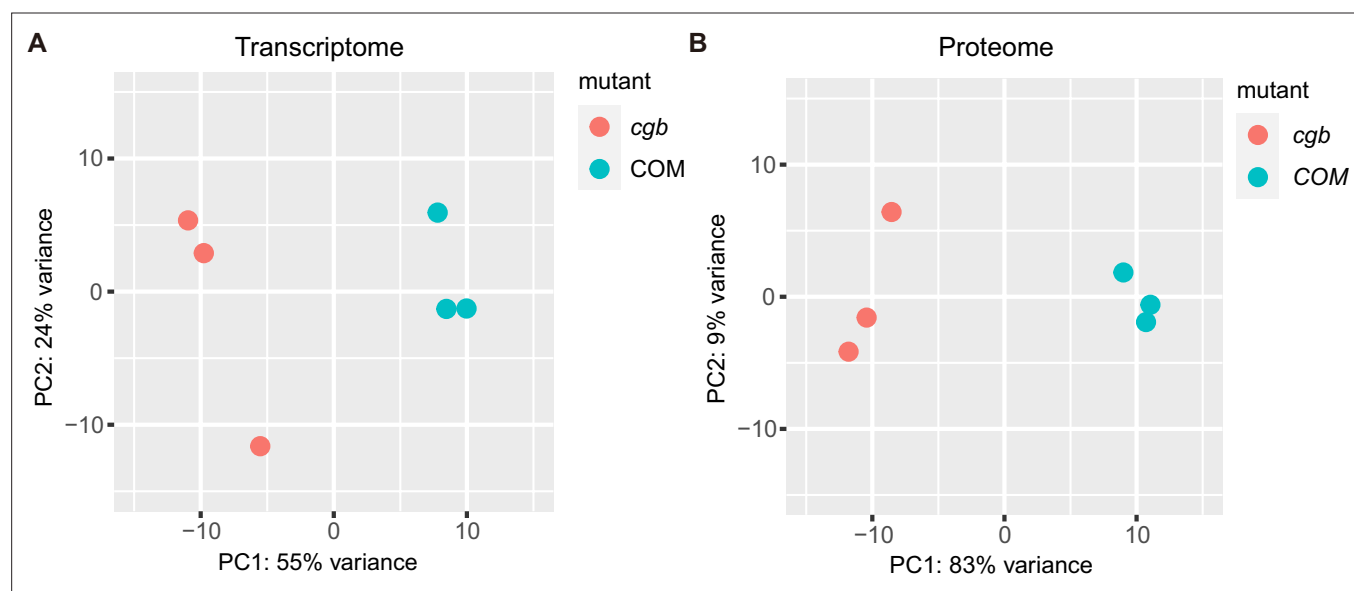

**Figure 4—figure supplement 1.** Principal component analysis (PCA) of the transcriptome (A) and proteome samples (B).

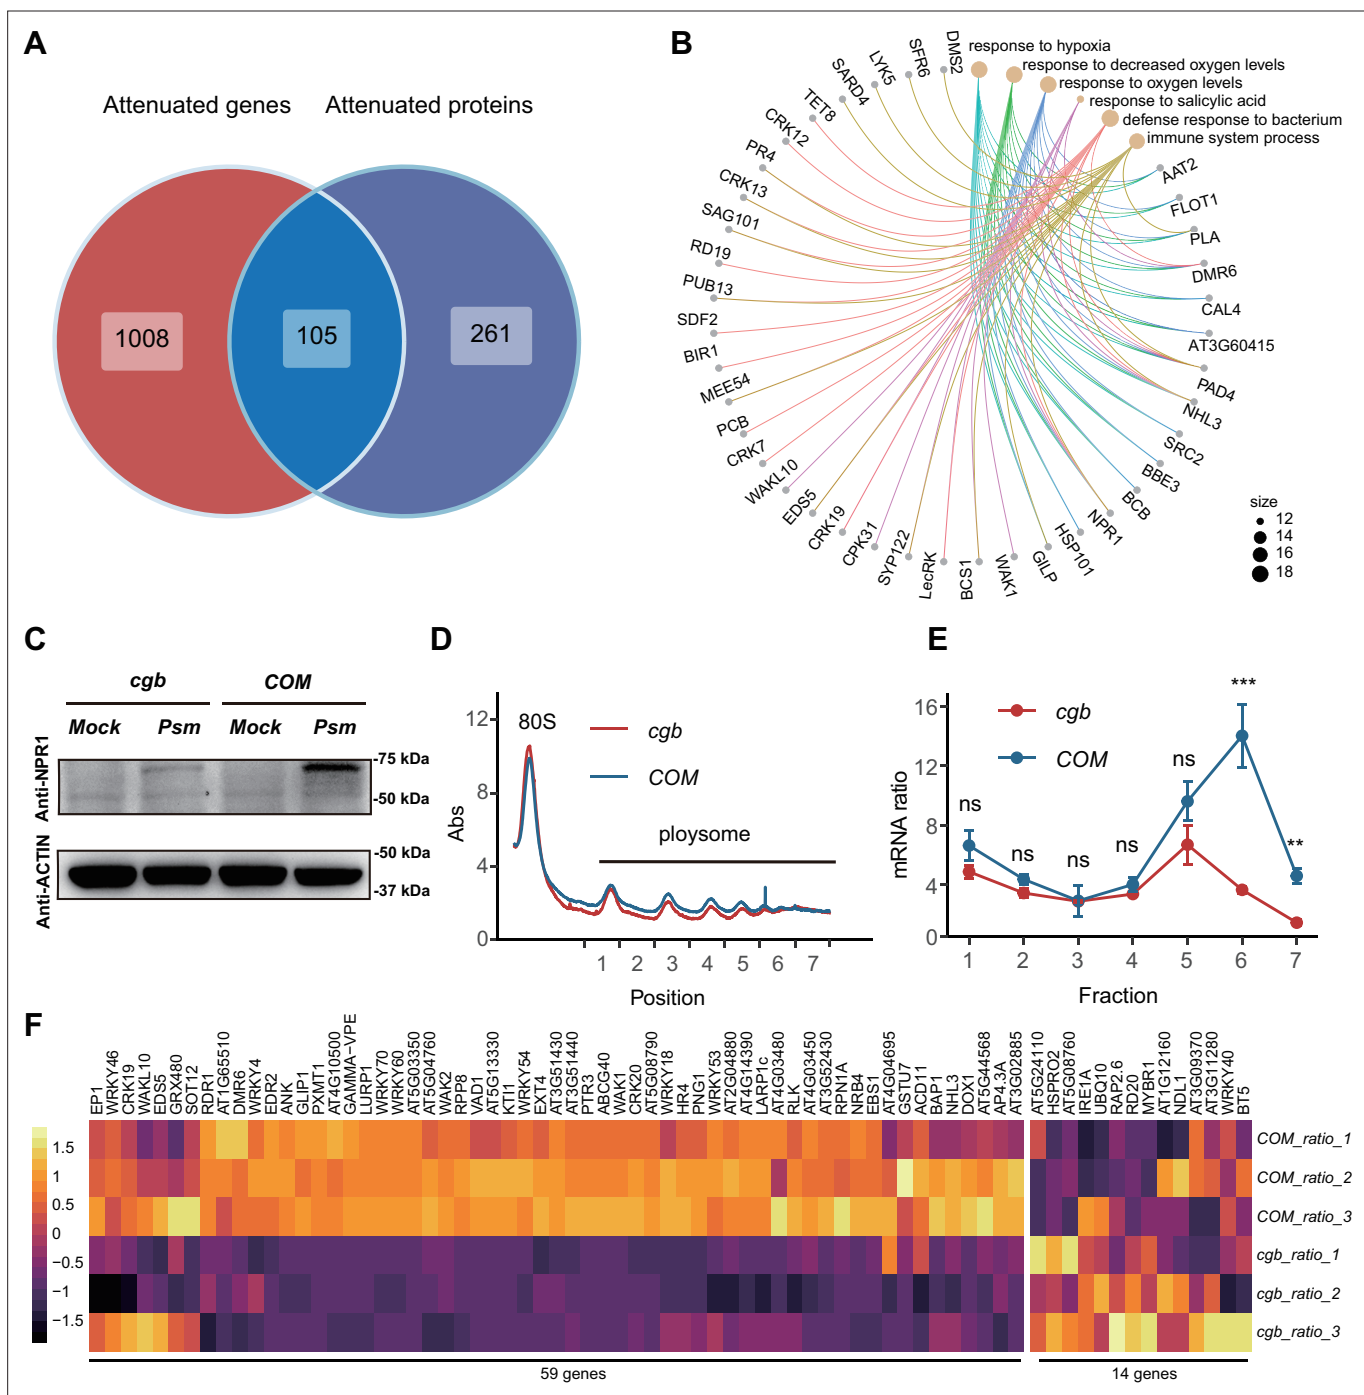

**Figure 5.** The translation of immune-related proteins is compromised in *cgb*. **(A)** Venn diagram analysis of attenuated genes and proteins. **(B)** Gene Ontology (GO) analysis of the 261 attenuated proteins. The top 6 significantly enriched GO terms are shown. **(C)** Western blot analysis of NPR1 protein levels. The 7-day-old seedlings grown on 1/2 MS medium were treated with buffer (10 mM MgCl<sub>2</sub>, pH 7.5, Mock) or *Psm* ES4326 (OD<sub>600</sub>=0.2) for 48 hr. **(D)** Polysome profiling results. Abs, the absorbance of sucrose gradient at 254 nm. The numbers on the X-axis indicate the polysomal fractions subjected to qPCR analyses. **(E)** The qPCR analyses. The relative mRNA level of *NPR1* in different fractions or in total mRNA was normalized against *UBQ5*. The ratio between the relative mRNA levels in each fraction and in total mRNA was shown (n=3). Statistical significance was determined by two-tailed Student's t-test. \*\*, p<0.01; \*\*\*, p<0.001; ns, not significant. **(F)** The heatmap showing the expression changes of salicylic acid (SA)-responsive genes after pathogen infection.

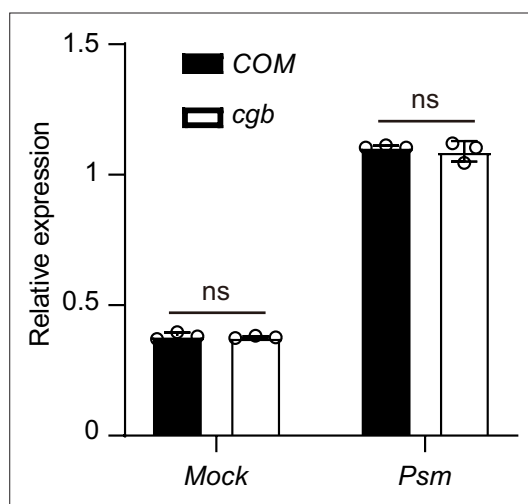

**Figure 5—figure supplement 1.** Analyses of *NPR1* transcript levels in *cgb* and *COM*. The 7-day-old seedlings grown on 1/2 MS medium were treated with buffer (10 mM  $\text{MgCl}_2$ , pH 7.5, Mock) or *Psm* ES4326 ( $\text{OD}_{600}=0.2$ ) for 48 hr. The relative mRNA level of *NPR1* was normalized against *UBQ5*. Error bars represent 95% confidence intervals ( $n=3$ ). Statistical significance was determined by two-tailed Student's t-test. ns, not significant.



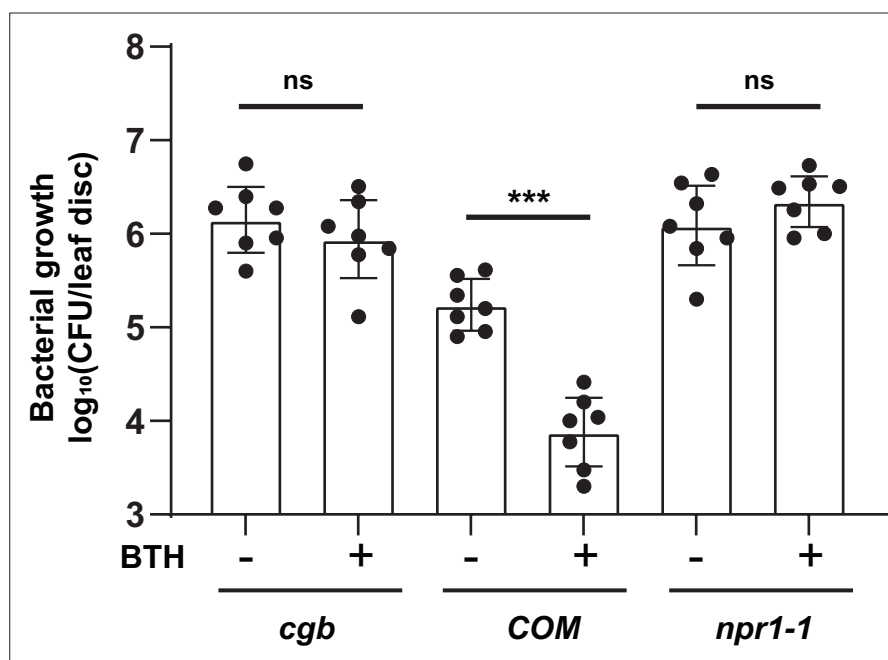

**Figure 5—figure supplement 2.** The salicylic acid (SA)-mediated protection assay. The *Arabidopsis* plants were treated with (+) or without (-) 600  $\mu$ M benzothiadiazole (BTH) for 24 hr before infection. The growth of *Psm* ES4326 was shown. CFU, colony-forming unit. Error bars represent 95% confidence intervals (n=7). Statistical significance was determined by two-tailed Student's t-test. \*\*\*,  $p < 0.001$ ; ns, not significant.

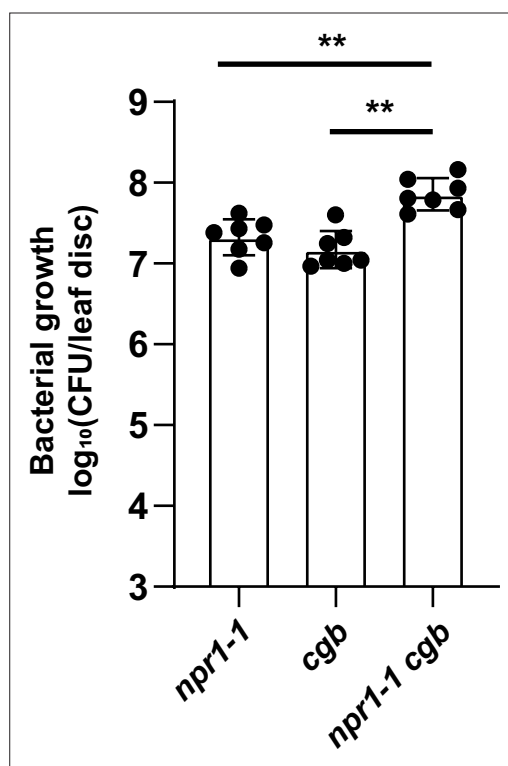

**Figure 5—figure supplement 3.** The genetic relationship between NPR1 and CGB. The *Arabidopsis* plants were infected with *Psm* ES4326 and the growth of *Psm* ES4326 was shown. CFU, colony-forming unit. Error bars represent 95% confidence intervals (n=7). Statistical significance was determined by two-tailed Student's t-test. \*\*, p<0.01.
